# Supplementary material for: H8-BINOL chiral imidodiphosphoric acid catalyzed highly enantioselective aza-Friedel–Crafts reactions of pyrroles and enamides/imines
Source: Royal Society of Chemistry journal article supplement (doi:10.1039/c5cc00685f), 2015-01-01
Supplement: c5cc00685f1.pdf [file c5cc00685f1.pdf]

# **H<sub>8</sub>-BINOL Chiral Imidodiphosphoric Acids Catalyzed Highly Enantioselective Aza-Friedel–Crafts Reactions of Pyrroles and Enamides/Imines**

**Kun Wu, Ming-Hua Zhuo, Di Sha, Yan-Sen Fan, Dong An, Yi-Jun Jiang\* and  
Suoqin Zhang\*<sup>a</sup>**

College of Chemistry, Jilin University, 2699 Qianjin Street, Changchun 130012 (P.R. China).

E-mail: [jiangyijun@jlu.edu.cn](mailto:jiangyijun@jlu.edu.cn), [suoqin@jlu.edu.cn](mailto:suoqin@jlu.edu.cn)

## **Supporting Information**

### **Contents:**

|                                                                                                 |           |
|-------------------------------------------------------------------------------------------------|-----------|
| <b>1. General information .....</b>                                                             | <b>2</b>  |
| <b>2. General Procedures and Characterization Data for Componds 4a-4l .....</b>                 | <b>2</b>  |
| <b>3. General Procedures and Characterization Data for Componds 6a-6r .....</b>                 | <b>7</b>  |
| <b>4. Supplementary Data of the Comparision of the Catalysts and Molecular<br/>Sieves .....</b> | <b>15</b> |
| <b>5. Experimental Procedures for Gram-Scale Reactions .....</b>                                | <b>17</b> |
| <b>6. Copies of NMR Spectra .....</b>                                                           | <b>18</b> |
| <b>7. Copies of HPLC Spectra .....</b>                                                          | <b>78</b> |

## 1. General information:

The solvents used were purified by distillation over the drying agents indicated and were transferred under argon: toluene (Na), 1,4-dioxane (Na). All other reagents were used without purification as commercially available. All reactions were monitored by thin layer chromatography. Purification of reaction products were carried out by flash chromatography on silica gel. Chemical yields refer to pure isolated substances. The melting point was recorded on a melting point apparatus (MPA100, Stanford Research Systems, Inc.). Optical rotations were measured using a 0.8 mL cell with a 1 cm path length on Jasco-P-2000 digital polarimeter and concentrations (c) were reported in  $\text{g} \times (100 \text{ mL})^{-1}$ .  $^1\text{H}$  NMR,  $^{13}\text{C}$  NMR and  $^{31}\text{P}$  NMR spectra were recorded on Bruker 300 MHz. Chemical shifts of  $^1\text{H}$  and  $^{13}\text{C}$  signals were given in  $\delta$  relative to the signal of tetramethylsilane (TMS). The following abbreviations are used: s, singlet, d, doublet, t, triplet, q, quartet, quint, quintuplet, m, multiplet, br, broad. IR spectra were recorded on Nicolet Avatar 360 FT-IR spectrometer. High-resolution mass spectral analysis (HRMS) data were measured on a Bruker ApexII mass spectrometer by means of the ESI technique. Analytical HPLC was recorded on a HPLC machine equipped with Agilent 1100 series quaternary pump with a UV diode array detector. The chiral stationary phase was Daicel Chiralpak AD-H, AS-H and OD-H column.

## 2. General Procedures and Characterization Data for Compounds 4a-4l

**General procedure for enamides:** Enamide **3** (0.1 mmol), imidodiphosphoric acid **1d** (2.4 mg, 0.002 mmol, 2 mol %), 5 Å molecular sieves (90 mg) and 1,4-dioxane (1 mL) were loaded into test tube, the solution was stirred for 5 minutes at room temperature and pyrrole **2** (0.11 mmol) was added. After the reaction was complete (monitored by TLC), the mixture was purified by silica gel chromatography (ethyl acetate/petroleum ether = 1/3) directly to afford the product **4**.

**(R)-N-[1-phenyl-1-(pyrrol-2-yl)ethyl]acetamide (4a)**

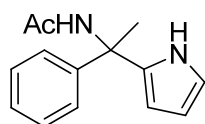

Reaction time: 2 h, white solid, 90% yield, mp: 159-160 °C,  $[\alpha]_D^{20} = 45.4$  ( $c = 1$ , Acetone), 96% *ee* [Daicel Chiralpak AS-H column, *n*-hexane/ethanol = 95 : 5, 1.0 mL/min,  $\lambda = 220$  nm,  $t(\text{major}) = 9.82$  min,  $t(\text{minor}) = 16.50$  min];  $^1\text{H NMR}$  (300 MHz,  $\text{CDCl}_3$ )  $\delta$  10.05 (br, 1H), 7.36 – 7.23 (m, 6H), 7.13 – 7.03 (m, 2H), 6.84 – 6.76 (m, 1H), 6.36 – 6.08 (m, 3H), 2.09 (s, 3H), 1.88 (s, 3H);  $^{13}\text{C NMR}$  (75 MHz,  $\text{CDCl}_3$ )  $\delta$  170.8, 145.4, 135.7, 128.1, 126.7, 125.1, 118.0, 106.3, 58.1, 30.7, 23.9. HRMS(ESI+)  $m/z$  calcd for  $\text{C}_{14}\text{H}_{17}\text{N}_2\text{O}$  ( $[\text{M}+\text{H}]^+$ ) : 229.1335, found: 229.1332.

**(R)-N-[1-(2-fluorophenyl)-1-(pyrrol-2-yl)ethyl]acetamide (4b)**

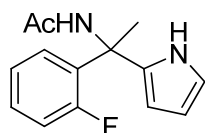

Reaction time: 8 h, white solid, 94% yield, mp: 162-163 °C,  $[\alpha]_D^{20} = 146$  ( $c = 1$ , Acetone), 94% *ee* [Daicel Chiralpak AS-H column, *n*-hexane/ethanol = 93 : 7, 1.0 mL/min,  $\lambda = 220$  nm,  $t(\text{major}) = 7.57$  min,  $t(\text{minor}) = 9.10$  min];  $^1\text{H NMR}$  (300 MHz,  $\text{CDCl}_3$ )  $\delta$  10.21 (br, 1H), 7.75 – 7.48 (m, 1H), 7.04 – 6.88 (m, 2H), 6.79 (s, 1H), 6.54 (t,  $J = 8.4$  Hz, 1H), 6.35 (d,  $J = 18.3$  Hz, 1H), 6.17 (s, 2H), 1.99 (s, 3H), 1.93 (s, 3H);  $^{13}\text{C NMR}$  (75 MHz,  $\text{CDCl}_3$ )  $\delta$  171.4, 135.2, 131.0, 129.4, 128.9, 124.0, 118.3, 116.2, 115.9, 106.6, 106.2, 56.7, 27.3, 23.7. HRMS(ESI+)  $m/z$  calcd for  $\text{C}_{14}\text{H}_{16}\text{FN}_2\text{O}$  ( $[\text{M}+\text{H}]^+$ ) : 247.1241, found: 247.1240.

**(R)-N-[1-(4-fluorophenyl)-1-(pyrrol-2-yl)ethyl]acetamide (4c)**

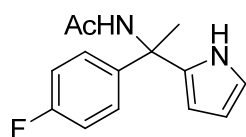

Reaction time: 8 h, white solid, 94% yield, mp: 126-127 °C,  $[\alpha]_D^{20} = 48.8$  ( $c = 1$ , Acetone), 95% *ee* [Daicel Chiralpak AS-H column, *n*-hexane/ethanol = 93 : 7, 1.0 mL/min,  $\lambda = 220$  nm,  $t(\text{major}) = 6.80$  min,  $t(\text{minor}) = 12.33$  min];  $^1\text{H NMR}$  (300 MHz,  $\text{CDCl}_3$ )  $\delta$  9.96 (br, 1H), 7.01 – 6.85 (m, 4H), 6.73 (s, 1H), 6.39 – 6.29 (m, 1H), 6.21 – 6.09 (m, 2H), 1.99 (s, 3H), 1.77 (s, 3H);  $^{13}\text{C NMR}$  (75 MHz,  $\text{CDCl}_3$ )  $\delta$  170.8, 163.2, 135.4, 126.9, 126.8, 118.3, 115.1, 114.8, 106.4, 57.8, 31.0, 24.0. HRMS(ESI+)  $m/z$  calcd for  $\text{C}_{14}\text{H}_{16}\text{FN}_2\text{O}$  ( $[\text{M}+\text{H}]^+$ ) : 247.1241, found: 247.1241.

**(R)-N-[1-(2-chlorophenyl)-1-(pyrrol-2-yl)ethyl]acetamide (4d)**

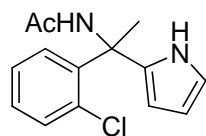

Reaction time: 8 h, white solid, 85% yield, mp: 175-176 °C,  $[\alpha]_{\text{D}}^{20} = 202.8$  ( $c = 1$ , Acetone), 93% *ee* [Daicel Chiralpak AS-H column, *n*-hexane/ethanol = 93 : 7, 1.0 mL/min,  $\lambda = 220$  nm,  $t(\text{major}) = 6.15$  min,  $t(\text{minor}) = 8.48$  min];  $^1\text{H NMR}$  (300 MHz,  $\text{CDCl}_3$ )  $\delta$  10.14 (br, 1H), 7.29 (dd,  $J = 7.8, 1.5$  Hz, 1H), 7.16 – 6.98 (m, 2H), 6.81 – 6.72 (m, 1H), 6.54 (dd,  $J = 7.8, 1.8$  Hz, 1H), 6.23 (br, 1H), 6.19 – 6.07 (m, 2H), 2.02 (s, 3H), 1.98 (s, 3H);  $^{13}\text{C NMR}$  (75 MHz,  $\text{CDCl}_3$ )  $\delta$  171.3, 141.4, 136.0, 131.5, 130.9, 130.0, 128.5, 127.0, 118.3, 106.6, 106.4, 58.6, 25.8, 23.5. HRMS(ESI+)  $m/z$  calcd for  $\text{C}_{14}\text{H}_{16}\text{ClN}_2\text{O}$  ( $[\text{M}+\text{H}]^+$ ): 263.0946, found: 263.0944.

**(R)-N-[1-(3-chlorophenyl)-1-(pyrrol-2-yl)ethyl]acetamide (4e)**

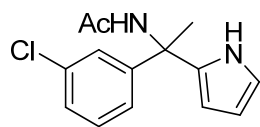

Reaction time: 8 h, white solid, 95% yield, mp: 123-124 °C,  $[\alpha]_{\text{D}}^{20} = 55.2$  ( $c = 1$ , Acetone), 96% *ee* [Daicel Chiralpak AS-H column, *n*-hexane/ethanol = 95 : 5, 1.0 mL/min,  $\lambda = 220$  nm,  $t(\text{major}) = 9.08$  min,  $t(\text{minor}) = 16.98$  min];  $^1\text{H NMR}$  (300 MHz,  $\text{CDCl}_3$ )  $\delta$  9.92 (br, 1H), 7.18 – 7.09 (m, 2H), 7.01 – 6.94 (m, 1H), 6.90 – 6.80 (m, 1H), 6.76 – 6.67 (m, 1H), 6.22 (br, 1H), 6.19 – 6.09 (m, 2H), 2.01 (s, 3H), 1.78 (s, 3H);  $^{13}\text{C NMR}$  (75 MHz,  $\text{CDCl}_3$ )  $\delta$  171.0, 139.9, 135.2, 133.1, 131.2, 130.8, 130.6, 126.8, 118.2, 106.4, 106.3, 57.9, 25.3, 23.0. HRMS(ESI+)  $m/z$  calcd for  $\text{C}_{14}\text{H}_{16}\text{ClN}_2\text{O}$  ( $[\text{M}+\text{H}]^+$ ): 263.0946, found: 263.0943.

**(R)-N-[1-(3-bromophenyl)-1-(pyrrol-2-yl)ethyl]acetamide(4f)**

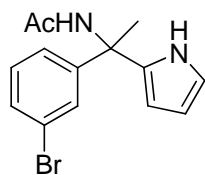

Reaction time: 5 h, white solid, 92% yield, m.p. 113-114 °C,  $[\alpha]_{\text{D}}^{20} = 63.4$  ( $c = 1$ , Acetone), 95% *ee* [Daicel Chiralpak AS-H column, *n*-hexane/ethanol = 93 : 7, 1.0 mL/min,  $\lambda = 220$  nm,  $t(\text{major}) = 7.40$  min,  $t(\text{minor}) = 13.62$  min];  $^1\text{H NMR}$  (300 MHz,  $\text{CDCl}_3$ )  $\delta$  9.94 (br, 1H), 7.39 – 7.30 (m, 1H), 7.20 – 7.07 (m, 2H), 6.97 – 6.89 (m, 1H), 6.79 – 6.73 (m, 1H), 6.27 (br, 1H),



6.23 – 6.13 (m, 2H), 2.04 (s, 3H), 1.80 (s, 3H);  $^{13}\text{C}$  NMR (75 MHz,  $\text{CDCl}_3$ )  $\delta$  171.0, 148.1, 134.9, 130.1, 129.9, 128.4, 124.1, 122.6, 118.6, 106.8, 106.6, 57.9, 30.9, 24.1. HRMS(ESI+)  $m/z$  calcd for  $\text{C}_{14}\text{H}_{16}\text{BrN}_2\text{O}$  ( $[\text{M}+\text{H}]^+$ ) : 307.0441, found: 307.0439.

**(R)-N-[1-(3-nitrophenyl)-1-(pyrrol-2-yl)ethyl]acetamide (4g)**

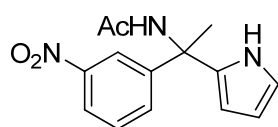

Reaction time: 8 h, yellow solid, 95% yield, mp: 135-136 °C,  $[\alpha]_{\text{D}}^{20} = 64.2$  ( $c = 1$ , Acetone), 98% *ee* [Daicel Chiralpak AS-H column, *n*-hexane/ethanol = 93 : 7, 1.0 mL/min,  $\lambda = 220$  nm,  $t(\text{major}) = 12.08$  min,  $t(\text{minor}) = 23.38$  min];  $^1\text{H}$  NMR (300 MHz,  $\text{CDCl}_3$ )  $\delta$  9.88 (br, 1H), 8.12 – 8.02 (m, 1H), 7.97 (t,  $J = 2.1$  Hz, 1H), 7.41 (t,  $J = 8.1$  Hz, 1H), 7.25 – 7.21 (m, 1H), 6.81 – 6.73 (m, 1H), 6.47 (s, 1H), 6.28 – 6.21 (m, 1H), 6.21 – 6.13 (m, 1H), 2.06 (s, 3H), 1.83 (s, 3H);  $^{13}\text{C}$  NMR (75 MHz,  $\text{CDCl}_3$ )  $\delta$  171.1, 148.3, 134.1, 131.6, 129.1, 121.8, 120.0, 118.7, 107.0, 106.7, 57.7, 30.5, 23.8. HRMS(ESI+)  $m/z$  calcd for  $\text{C}_{14}\text{H}_{16}\text{N}_3\text{O}_3$  ( $[\text{M}+\text{H}]^+$ ) : 274.1186, found: 274.1185.

**(R)-N-[1-(4-methylphenyl)-1-(pyrrol-2-yl)ethyl]acetamide (4h)**

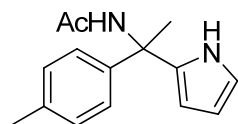

Reaction time: 5 h, white solid, 86% yield, mp: 137-138 °C,  $[\alpha]_{\text{D}}^{20} = 46.0$  ( $c = 1$ , Acetone), 91% *ee* [Daicel Chiralpak AS-H column, *n*-hexane/ethanol = 93 : 7, 1.0 mL/min,  $\lambda = 220$  nm,  $t(\text{major}) = 6.12$  min,  $t(\text{minor}) = 12.23$  min];  $^1\text{H}$  NMR (300 MHz,  $\text{CDCl}_3$ )  $\delta$  9.99 (br, 1H), 7.07 (d,  $J = 8.1$  Hz, 2H), 6.92 (d,  $J = 8.4$  Hz, 2H), 6.73 (q,  $J = 2.4$  Hz, 1H), 6.22 (br, 1H), 6.18 – 6.05 (m, 2H), 2.30 (s, 3H), 2.01 (s, 3H), 1.81 (s, 3H);  $^{13}\text{C}$  NMR (75 MHz,  $\text{CDCl}_3$ )  $\delta$  170.9, 142.6, 136.5, 136.0, 129.0, 125.2, 118.1, 106.4, 106.3, 58.2, 31.0, 24.2, 21.1. HRMS(ESI+)  $m/z$  calcd for  $\text{C}_{15}\text{H}_{19}\text{N}_2\text{O}$  ( $[\text{M}+\text{H}]^+$ ) : 243.1492, found: 243.1493.

**(R)-N-[1-(3-methoxyphenyl)-1-(pyrrol-2-yl)ethyl]acetamide (4i)**

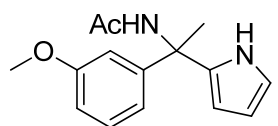

Reaction time: 5 h, white solid, 93% yield, mp: 133-134 °C,  $[\alpha]_{\text{D}}^{20} = 54.8$  ( $c = 1$ , Acetone), 93% *ee* [Daicel Chiralpak AS-H

column, *n*-hexane/ethanol = 93 : 7, 1.0 mL/min,  $\lambda = 220$  nm,  $t(\text{major}) = 8.47$  min,  $t(\text{minor}) = 13.72$  min];  $^1\text{H NMR}$  (300 MHz,  $\text{CDCl}_3$ )  $\delta$  10.01 (br, 1H), 7.19 (t,  $J = 8.1$  Hz, 1H), 6.80 – 6.71 (m, 2H), 6.65 (dd,  $J = 7.8, 1.8$  Hz, 1H), 6.60 – 6.55 (m, 1H), 6.34 – 6.24 (m, 1H), 6.22 – 6.10 (m, 2H), 3.74 (s, 3H), 2.02 (s, 3H), 1.83 (s, 3H);  $^{13}\text{C NMR}$  (75 MHz,  $\text{CDCl}_3$ )  $\delta$  170.5, 159.2, 147.1, 135.3, 128.9, 117.8, 117.5, 111.8, 111.1, 106.1, 57.9, 54.8, 30.5, 23.8. HRMS(ESI+)  $m/z$  calcd for  $\text{C}_{15}\text{H}_{19}\text{N}_2\text{O}_2$  ( $[\text{M}+\text{H}]^+$ ) : 259.1441, found: 259.1438.

**(R)-N-[1-(naphthalene-1-yl)-1-(pyrrol-2-yl)ethyl]acetamide (4j)**

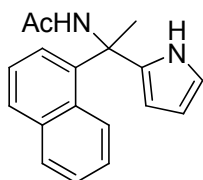

Reaction time: 8 h, white solid, 96% yield, mp: 128-129 °C,  $[\alpha]_{\text{D}}^{20} = 57.0$  ( $c = 1$ , Acetone), 94% *ee* [Daicel Chiralpak AS-H column, *n*-hexane/ethanol = 90 : 10, 1.0 mL/min,  $\lambda = 220$  nm,  $t(\text{minor}) = 5.63$  min,  $t(\text{major}) = 6.97$  min];  $^1\text{H NMR}$  (300 MHz,  $\text{CDCl}_3$ )  $\delta$  10.01 (br, 1H), 8.06 (d,  $J = 7.8$  Hz, 1H), 7.90 – 7.74 (m, 2H), 7.54 – 7.29 (m, 4H), 6.79 – 6.64 (m, 1H), 6.43 – 6.23 (m, 1H), 6.08 (q,  $J = 3.0$  Hz, 1H), 5.90 (br, 1H), 2.19 (s, 3H), 1.96 (s, 3H);  $^{13}\text{C NMR}$  (75 MHz,  $\text{CDCl}_3$ )  $\delta$  170.5, 139.2, 136.9, 134.6, 130.1, 129.3, 128.8, 128.2, 125.3, 125.2, 125.1, 124.8, 117.5, 106.5, 105.7, 59.2, 27.6, 23.7. HRMS(ESI+)  $m/z$  calcd for  $\text{C}_{18}\text{H}_{19}\text{N}_2\text{O}$  ( $[\text{M}+\text{H}]^+$ ) : 279.1492, found: 279.1492.

**(R)-N-[1-(naphthalene-1-yl)-1-(5-ethyl-1H-pyrrol-2-yl)ethyl]acetamide (4k)**

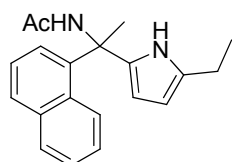

Reaction time: 12 h, white solid, 83% yield, mp: 70-71 °C,  $[\alpha]_{\text{D}}^{20} = 46.0$  ( $c = 1$ , Acetone), 91% *ee* [Daicel Chiralpak AS-H column, *n*-hexane/ethanol = 98 : 2, 1.0 mL/min,  $\lambda = 220$  nm,  $t(\text{major}) = 16.42$  min,  $t(\text{minor}) = 42.05$  min];  $^1\text{H NMR}$  (400 MHz,  $\text{CDCl}_3$ )  $\delta$  9.77 (br, 1H), 8.17 (d,  $J = 8.0$  Hz, 1H), 7.89 (d,  $J = 7.9$  Hz, 1H), 7.81 (d,  $J = 7.4$  Hz, 1H), 7.43 (dd,  $J = 21.5, 8.6$  Hz, 3H), 6.30 (s, 1H), 5.82 (s, 2H), 2.61 (q, 2H), 2.22 (s, 3H), 2.02 (s, 3H), 1.23 (t,  $J = 7.6$  Hz, 3H);  $^{13}\text{C NMR}$  (101 MHz,  $\text{CDCl}_3$ )  $\delta$  170.54, 139.61, 135.38, 134.84, 134.53, 130.48, 129.50, 128.97, 125.52, 125.45, 125.27, 125.09,

124.98, 105.97, 102.57, 59.60, 27.97, 24.14, 20.97, 13.55. HRMS(ESI+)  $m/z$  calcd for  $C_{20}H_{23}N_2O$  ( $[M+H]^+$ ) : 307.1805, found: 307.1802.

**(R)-N-[1-(naphthalene-1-yl)-1-(4-ethyl-3,5-dimethyl-1H-pyrrol-2-yl)ethyl]acetamide (4l)**

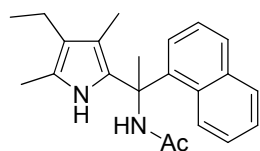

Reaction time: 12 h, white solid, 80% yield, mp: 71-72 °C,  $[\alpha]_D^{20} = 4.0$  ( $c = 1$ , Acetone), 77% *ee* [Daicel Chiralpak AS-H column, *n*-hexane/ethanol = 97 : 3, 1.0 mL/min,  $\lambda = 220$  nm,  $t(\text{major}) = 8.35$  min,  $t(\text{minor}) = 16.98$  min];  $^1\text{H}$  NMR (400 MHz,  $\text{CDCl}_3$ )  $\delta$  8.77 (br, 1H), 8.00 – 7.83 (m, 3H), 7.66 (d,  $J = 6.7$  Hz, 1H), 7.57 – 7.41 (m, 2H), 7.40 – 7.31 (m, 1H), 6.26 (s, 1H), 2.36 (s, 3H), 2.29 (q,  $J = 15.1, 8.2$  Hz, 2H), 2.13 (s, 3H), 2.00 (s, 3H), 1.40 (s, 3H), 0.97 (t,  $J = 7.2$  Hz, 3H);  $^{13}\text{C}$  NMR (101 MHz,  $\text{CDCl}_3$ )  $\delta$  170.26, 139.55, 134.92, 129.26, 129.16, 128.71, 125.65, 125.56, 125.22, 125.00, 121.09, 112.85, 60.86, 27.07, 24.61, 17.46, 15.78, 11.16, 9.80. HRMS(ESI+)  $m/z$  calcd for  $C_{22}H_{27}N_2O$  ( $[M+H]^+$ ) : 335.2118, found: 335.2115.

**3. General Procedures and Characterization Data for Compounds 6a-6r**

**General procedure for aldimines:** Aldimine **5** (0.1 mmol), imidodiphosphoric acid **1b** (100  $\mu\text{L}$  of 4.6 mg/mL solution in toluene, 0.46 mg, 0.0003 mmol, 0.3 mol %), 5Å molecular sieves (5 mg) and toluene (0.3 mL) were loaded into test tube, the solution was stirred for 15 minutes at -60 °C and pyrrole **2** (0.11 mmol) was added. After the reaction was complete (monitored by TLC), the mixture was purified by silica gel chromatography (ethyl acetate/petroleum ether = 1/3) directly to afford the product **6**.

**(R)-N-(pyrrol-2-yl-phenylmethyl)-4-methylbenzenesulfonamide (6a)**

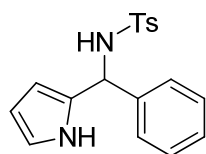

Reaction time: 9 h, white solid, 90% yield, mp: 120-121 °C,  $[\alpha]_D^{20} = -8.8$  ( $c = 1.0$ , Acetone), 99% *ee* [Daicel Chiralpak AD-H column, *n*-hexane/*i*-PrOH = 80 : 20, 1.0 mL/min,  $\lambda = 254$  nm,  $t(\text{major}) =$

13.77 min, t(minor) = 21.35 min];  $^1\text{H NMR}$  (300 MHz,  $\text{CDCl}_3$ )  $\delta$  8.55 (br, 1H), 7.58 (d,  $J = 8.4$  Hz, 1H), 7.34 – 7.03 (m, 8H), 6.79 – 6.65 (m, 1H), 6.11 – 5.98 (m, 1H), 5.65 – 5.58 (m, 1H), 5.53 (d,  $J = 7.8$  Hz, 1H), 5.21 (d,  $J = 7.5$  Hz, 1H), 2.38 (s, 3H);  $^{13}\text{C NMR}$  (75 MHz,  $\text{CDCl}_3$ )  $\delta$  143.6, 138.8, 137.1, 130.8, 129.6, 128.7, 128.1, 127.4, 127.3, 118.8, 108.4, 108.2, 56.0, 21.6. HRMS(ESI+)  $m/z$  calcd for  $\text{C}_{18}\text{H}_{19}\text{N}_2\text{O}_2\text{S}$  ( $[\text{M}+\text{H}]^+$ ) : 327.1162, found: 327.1161.

**(R)-N-[pyrrol-2-yl-(2-methylphenyl)methyl]-4-methylbenzenesulfonamide (6b)**

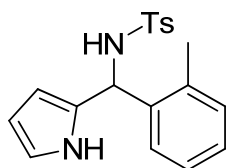

Reaction time: 24 h, colorless gum, 94% yield,  $[\alpha]_{\text{D}}^{20} = -13.6$  ( $c$  1.0, Acetone), 98% *ee* [Daicel Chiralpak AD-H column, *n*-hexane/*i*-PrOH = 60 : 40, 1.0 mL/min,  $\lambda = 254$  nm, t(major) = 7.65 min, t(minor) = 14.12 min];  $^1\text{H NMR}$  (300 MHz,  $\text{CDCl}_3$ )  $\delta$  8.53 (br, 1H), 7.58 (d,  $J = 8.4$  Hz, 2H), 7.19 – 7.00 (m, 6H), 6.76 – 6.66 (m, 1H), 6.05 – 5.93 (m, 1H), 5.72 (d,  $J = 7.5$  Hz, 1H), 5.54 – 5.46 (m, 1H), 5.22 – 5.09 (m, 1H), 2.37 (s, 3H), 2.05 (s, 3H);  $^{13}\text{C NMR}$  (75 MHz,  $\text{CDCl}_3$ )  $\delta$  143.5, 137.1, 136.9, 135.5, 130.5, 130.2, 129.5, 127.8, 127.1, 127.0, 126.3, 118.7, 108.3, 108.1, 52.4, 21.6, 19.1. HRMS(ESI+)  $m/z$  calcd for  $\text{C}_{19}\text{H}_{21}\text{N}_2\text{O}_2\text{S}$  ( $[\text{M}+\text{H}]^+$ ) : 341.1318, found: 341.1316.

**(R)-N-[pyrrol-2-yl-(3-methylphenyl)methyl]-4-methylbenzenesulfonamide (6c)**

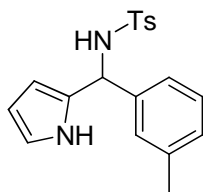

Reaction time: 24 h, colorless gum, 97% yield,  $[\alpha]_{\text{D}}^{20} = -8.3$  ( $c$  1.0, Acetone), 98% *ee* [Daicel Chiralpak AD-H column, *n*-hexane/*i*-PrOH = 60 : 40, 1.0 mL/min,  $\lambda = 254$  nm, t(major) = 7.13 min, t(minor) = 9.27 min];  $^1\text{H NMR}$  (300 MHz,  $\text{CDCl}_3$ )  $\delta$  8.52 (br, 1H), 7.57 (d,  $J = 8.2$  Hz, 2H), 7.16 (d,  $J = 8.1$  Hz, 2H), 7.10 (d,  $J = 7.5$  Hz, 1H), 7.03 (d,  $J = 7.3$  Hz, 1H), 6.91 (d,  $J = 7.4$  Hz, 1H), 6.84 (s, 1H), 6.72 (s, 1H), 6.04 (dd,  $J = 5.7, 2.8$  Hz, 1H), 5.63 (s, 1H), 5.49 (d,  $J = 7.8$  Hz, 1H), 5.17 (d,  $J = 7.4$  Hz, 1H), 2.38 (s, 3H), 2.21 (s, 3H);  $^{13}\text{C NMR}$  (75 MHz,  $\text{CDCl}_3$ )  $\delta$  143.14, 138.43, 137.99, 137.08, 130.64, 129.28, 128.46, 128.31, 127.99, 127.07, 124.41, 118.51, 108.10, 107.89, 55.86, 21.41, 21.17. HRMS(ESI+)  $m/z$  calcd for  $\text{C}_{19}\text{H}_{21}\text{N}_2\text{O}_2\text{S}$  ( $[\text{M}+\text{H}]^+$ ) : 341.1318, found: 341.1316.

**(R)-N-[pyrrol-2-yl-(4-methylphenyl)methyl]-4-methylbenzenesulfonamide (6d)**

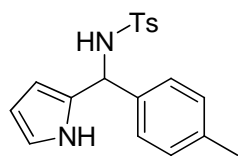

Reaction time: 5 h, colorless gum, 96% yield,  $[\alpha]_D^{20} = -6.6$  (*c* 1.0, Acetone), >99% *ee* [Daicel Chiralpak AD-H column, *n*-hexane/*i*-PrOH = 90 : 10, 1.0 mL/min,  $\lambda = 254$  nm,  $t(\text{major}) = 23.90$  min,  $t(\text{minor}) = 27.05$  min];  $^1\text{H NMR}$  (300 MHz,  $\text{CDCl}_3$ )  $\delta$  8.55 (br, 1H), 7.59 (d,  $J = 8.4$  Hz, 2H), 7.18 (d,  $J = 8.4$  Hz, 2H), 7.08 – 6.91 (m, 4H), 6.76 – 6.62 (m, 1H), 6.08 – 5.98 (m, 1H), 5.67 – 5.54 (m, 1H), 5.47 (d,  $J = 7.8$  Hz, 1H), 5.08 (d,  $J = 7.8$  Hz, 1H), 2.39 (s, 3H), 2.31 (s, 3H);  $^{13}\text{C NMR}$  (75 MHz,  $\text{CDCl}_3$ )  $\delta$  143.4, 137.7, 137.2, 135.8, 130.9, 129.5, 129.2, 127.3, 127.2, 118.6, 108.3, 108.0, 55.7, 21.6, 21.2. HRMS(ESI+)  $m/z$  calcd for  $\text{C}_{19}\text{H}_{21}\text{N}_2\text{O}_2\text{S}$  ( $[\text{M}+\text{H}]^+$ ) : 341.1318, found: 341.1318.

**(R)-N-[pyrrol-2-yl-(2-methoxyphenyl)methyl]-4-methylbenzenesulfonamide (6e)**

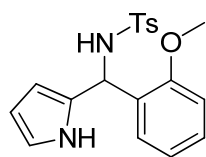

Reaction time: 24 h, white solid, 90% yield, mp: 150-151 °C,  $[\alpha]_D^{20} = -22.0$  (*c* 1.0, Acetone), 97% *ee* [Daicel Chiralpak AD-H column, *n*-hexane/*i*-PrOH = 60 : 40, 1.0 mL/min,  $\lambda = 254$  nm,  $t(\text{major}) = 11.47$  min,  $t(\text{minor}) = 22.18$  min];  $^1\text{H NMR}$  (300 MHz,  $\text{CDCl}_3$ )  $\delta$  8.66 (br, 1H), 7.52 (d,  $J = 8.4$  Hz, 2H), 7.18 (td,  $J = 7.8, 1.8$  Hz, 1H), 7.07 (d,  $J = 8.1$  Hz, 2H), 6.98 (dd,  $J = 7.5, 1.8$  Hz, 1H), 6.80 (td,  $J = 7.5, 1.1$  Hz, 1H), 6.74 – 6.66 (m, 2H), 6.04 – 5.98 (m, 1H), 5.95 – 5.85 (m, 1H), 5.64 (d,  $J = 9.3$  Hz, 1H), 5.60 – 5.54 (m, 1H), 3.66 (s, 3H), 2.33 (s, 3H);  $^{13}\text{C NMR}$  (75 MHz,  $\text{CDCl}_3$ )  $\delta$  156.6, 143.0, 137.3, 130.7, 129.6, 129.2, 129.2, 127.1, 126.3, 120.9, 118.1, 111.2, 108.1, 106.9, 55.5, 54.1, 21.5. HRMS(ESI+)  $m/z$  calcd for  $\text{C}_{19}\text{H}_{21}\text{N}_2\text{O}_3\text{S}$  ( $[\text{M}+\text{H}]^+$ ) : 357.1267, found: 357.1267.

**(R)-N-[pyrrol-2-yl-(3-methoxyphenyl)methyl]-4-methylbenzenesulfonamide(6f)**

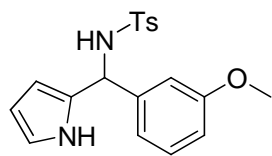

Reaction time: 24 h, white solid, 98% yield, mp: 126-127 °C,  $[\alpha]_D^{20} = -13.6$  (*c* 1.0, Acetone), 99% *ee* [Daicel Chiralpak AD-H column, *n*-hexane/*i*-PrOH = 60 : 40, 1.0 mL/min,  $\lambda = 254$  nm,  $t(\text{major}) = 8.98$  min,  $t(\text{minor}) = 11.57$  min];  $^1\text{H NMR}$  (300 MHz,  $\text{CDCl}_3$ )  $\delta$  8.53 (br,

1H), 7.59 (d,  $J = 8.4$  Hz, 2H), 7.20 – 7.09 (m, 3H), 6.80 – 6.67 (m, 3H), 6.63 – 6.58 (m, 1H), 6.07 – 5.98 (m, 1H), 5.68 – 5.60 (m, 1H), 5.51 (d,  $J = 8.1$  Hz, 1H), 5.23 – 5.10 (m, 1H), 3.69 (s, 3H), 2.39 (s, 3H);  $^{13}\text{C}$  NMR (75 MHz,  $\text{CDCl}_3$ )  $\delta$  159.6, 143.3, 140.2, 137.1, 130.5, 129.5, 129.4, 127.2, 119.8, 118.7, 113.7, 112.7, 108.2, 108.1, 55.9, 55.1, 21.5. HRMS(ESI+)  $m/z$  calcd for  $\text{C}_{19}\text{H}_{21}\text{N}_2\text{O}_3\text{S}$  ( $[\text{M}+\text{H}]^+$ ) : 357.1267, found: 357.1266.

**(R)-N-[pyrrol-2-yl-(4-methoxyphenyl)methyl]-4-methylbenzenesulfonamide (6g)**

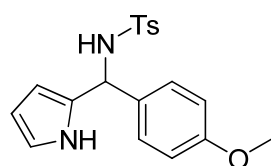

Reaction time: 15 h, white solid, 85% yield, mp: 161-162 °C,  $[\alpha]_{\text{D}}^{20} = -3.2$  ( $c$  1.0, Acetone), 98% *ee* [Daicel Chiralpak AD-H column, *n*-hexane/*i*-PrOH = 60 : 40, 1.0 mL/min,  $\lambda = 254$  nm,  $t(\text{minor}) = 9.62$  min,  $t(\text{major}) = 10.78$  min];  $^1\text{H}$  NMR (300 MHz,  $\text{CDCl}_3$ )  $\delta$  8.58 (br, 1H), 7.56 (d,  $J = 8.4$  Hz, 2H), 7.16 (d,  $J = 8.1$  Hz, 2H), 7.00 (d,  $J = 8.7$  Hz, 2H), 6.76 – 6.63 (m, 3H), 6.06 – 5.93 (m, 1H), 5.63 – 5.56 (m, 1H), 5.47 (d,  $J = 7.8$  Hz, 1H), 5.25 (d,  $J = 7.8$  Hz, 1H), 3.76 (s, 3H), 2.38 (s, 3H);  $^{13}\text{C}$  NMR (75 MHz,  $\text{CDCl}_3$ )  $\delta$  159.3, 143.4, 137.2, 131.1, 131.0, 129.6, 128.7, 127.3, 118.6, 113.9, 108.3, 108.0, 55.5, 55.4, 21.6. HRMS(ESI+)  $m/z$  calcd for  $\text{C}_{19}\text{H}_{21}\text{N}_2\text{O}_3\text{S}$  ( $[\text{M}+\text{H}]^+$ ) : 357.1267, found: 357.1266.

**(R)-N-[pyrrol-2-yl-(2,3-dimethoxyphenyl)methyl]-4-methylbenzenesulfonamide(6h)**

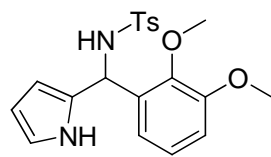

Reaction time: 15 h, white solid, 98% yield, m.p. 139-140 °C,  $[\alpha]_{\text{D}}^{20} = -12.2$  ( $c$  1.0, Acetone), 97% *ee* [Daicel Chiralpak AD-H column, *n*-hexane/*i*-PrOH = 60 : 40, 1.0 mL/min,  $\lambda = 254$  nm,  $t(\text{major}) = 7.52$  min,  $t(\text{minor}) = 10.95$  min];  $^1\text{H}$  NMR (300 MHz,  $\text{CDCl}_3$ )  $\delta$  8.72 (br, 1H), 7.58 (d,  $J = 8.4$  Hz, 2H), 7.13 – 7.04 (m, 2H), 6.91 – 6.82 (m, 1H), 6.78 (dd,  $J = 8.4, 1.5$  Hz, 1H), 6.73 – 6.66 (m, 1H), 6.59 (dd,  $J = 7.5, 1.8$  Hz, 1H), 6.05 – 5.94 (m, 2H), 5.63 – 5.48 (m, 2H), 3.81 (s, 3H), 3.53 (s, 3H), 2.33 (s, 3H);  $^{13}\text{C}$  NMR (75 MHz,  $\text{CDCl}_3$ )  $\delta$  152.6, 146.2, 143.0, 137.0, 132.4, 131.0, 129.2, 127.0, 123.9, 120.7, 117.8, 112.2, 108.1, 106.7, 60.4, 55.7, 53.5, 21.4. HRMS(ESI+)  $m/z$  calcd for  $\text{C}_{20}\text{H}_{23}\text{N}_2\text{O}_4\text{S}$  ( $[\text{M}+\text{H}]^+$ ) : 387.1373, found: 387.1370.

**(R)-N-[pyrrol-2-yl-(3,5-dimethoxyphenyl)methyl]-4-methylbenzenesulfonamide(6i)**

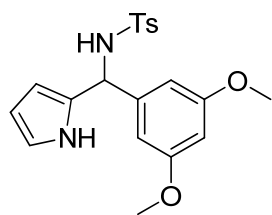

Reaction time: 48 h, colorless gum, 67% yield,  $[\alpha]_D^{20} = -8.0$  (*c* 1.0, Acetone), >99% *ee* [Daicel Chiralpak AD-H column, *n*-hexane/*i*-PrOH = 60 : 40, 1.0 mL/min,  $\lambda = 254$  nm,  $t(\text{major}) = 8.52$  min,  $t(\text{minor}) = 20.10$  min];  $^1\text{H NMR}$  (300 MHz,  $\text{CDCl}_3$ )

$\delta$  8.52 (br, 1H), 7.59 (d,  $J = 8.4$  Hz, 2H), 7.18 (d,  $J = 8.1$  Hz, 2H), 6.78 – 6.66 (m, 1H), 6.31 (t,  $J = 2.1$  Hz, 1H), 6.24 (d,  $J = 2.1$  Hz, 2H), 6.10 – 5.99 (m, 1H), 5.76 – 5.65 (m, 1H), 5.46 (d,  $J = 7.8$  Hz, 1H), 5.29 – 5.11 (m, 1H), 3.67 (s, 3H), 2.39 (s, 3H);  $^{13}\text{C NMR}$  (75 MHz,  $\text{CDCl}_3$ )  $\delta$  160.8, 143.4, 140.8, 137.2, 130.3, 129.5, 127.2, 118.7, 108.3, 108.0, 105.4, 100.2, 56.1, 55.3, 21.5. HRMS(ESI+)  $m/z$  calcd for  $\text{C}_{20}\text{H}_{23}\text{N}_2\text{O}_4\text{S}$  ( $[\text{M}+\text{H}]^+$ ) : 387.1373, found: 387.1371.

**(R)-N-[pyrrol-2-yl-(4-isopropylphenyl)methyl]-4-methylbenzenesulfonamide (6j)**

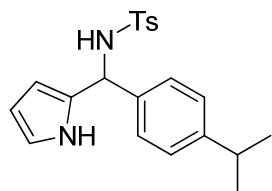

Reaction time: 15 h, colorless gum, 99% yield,  $[\alpha]_D^{20} = -5.0$  (*c* 1.0, Acetone), 99% *ee* [Daicel Chiralpak OD-H column, *n*-hexane/*i*-PrOH = 90 : 10, 1.0 mL/min,  $\lambda = 254$  nm,  $t(\text{major}) = 6.45$  min,  $t(\text{minor}) = 9.67$  min];  $^1\text{H NMR}$  (300 MHz,  $\text{CDCl}_3$ )

$\delta$  8.50 (br, 1H), 7.57 (d,  $J = 8.4$  Hz, 2H), 7.15 (d,  $J = 7.8$  Hz, 2H), 7.09 – 6.93 (m, 4H), 6.77 – 6.68 (m, 1H), 6.07 – 5.99 (m, 1H), 5.65 (s, 1H), 5.52 (d,  $J = 7.8$  Hz, 1H), 5.17 – 5.01 (m, 1H), 2.85 (p,  $J = 7.2, 6.6$  Hz, 1H), 2.38 (s, 3H), 1.22 (d,  $J = 6.9$  Hz, 6H);  $^{13}\text{C NMR}$  (75 MHz,  $\text{CDCl}_3$ )  $\delta$  148.7, 143.3, 137.2, 136.0, 130.9, 129.5, 127.4, 127.3, 126.6, 118.6, 108.3, 108.1, 55.9, 33.9, 24.1, 21.6. HRMS(ESI+)  $m/z$  calcd for  $\text{C}_{21}\text{H}_{25}\text{N}_2\text{O}_2\text{S}$  ( $[\text{M}+\text{H}]^+$ ) : 369.1631, found: 369.1631.

**(R)-N-[pyrrol-2-yl-(2-fluorophenyl)methyl]-4-methylbenzenesulfonamide (6k)**

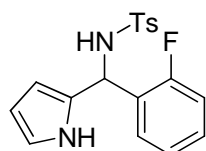

Reaction time: 48 h, Pale yellow solid, 65% yield, mp: 124-125 °C,  $[\alpha]_D^{20} = -12.2$  (*c* 1.0, Acetone), 96% *ee* [Daicel Chiralpak AD-H

column, *n*-hexane/*i*-PrOH = 60 : 40, 1.0 mL/min,  $\lambda$  = 254 nm,  $t(\text{major})$  = 8.22 min,  $t(\text{minor})$  = 17.20 min];  $^1\text{H NMR}$  (300 MHz,  $\text{CDCl}_3$ )  $\delta$  8.61 (br, 1H), 7.58 (d,  $J$  = 8.4 Hz, 2H), 7.25 – 7.16 (m, 1H), 7.15 – 7.08 (m, 3H), 7.05 – 6.97 (m, 1H), 6.94 – 6.84 (m, 1H), 6.79 – 6.68 (m, 1H), 6.08 – 5.97 (m, 1H), 5.75 (d,  $J$  = 9.0 Hz, 1H), 5.63 – 5.53 (m, 1H), 5.44 – 5.25 (m, 1H), 2.35 (s, 3H);  $^{13}\text{C NMR}$  (75 MHz,  $\text{CDCl}_3$ )  $\delta$  143.3, 136.7, 129.6, 129.5, 129.3, 129.2, 129.2, 127.0, 124.2, 118.8, 115.7, 115.4, 108.2, 107.6, 51.1, 21.4. HRMS(ESI+)  $m/z$  calcd for  $\text{C}_{18}\text{H}_{18}\text{FN}_2\text{O}_2\text{S}$  ( $[\text{M}+\text{H}]^+$ ) : 345.1068, found: 345.1066.

**(*R*)-*N*-[pyrrol-2-yl-(3-fluorophenyl)methyl]-4-methylbenzenesulfonamide (6l)**

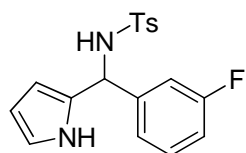

Reaction time: 24 h, white solid, 75% yield, mp: 127-128 °C,  $[\alpha]_{\text{D}}^{20}$  = -37.8 (*c* 1.0, Acetone), 99% *ee* [Daicel Chiralpak AD-H column, *n*-hexane/*i*-PrOH = 60 : 40, 1.0 mL/min,  $\lambda$  = 254 nm,  $t(\text{major})$  = 6.60 min,  $t(\text{minor})$  = 7.38 min];  $^1\text{H NMR}$  (300 MHz,  $\text{CDCl}_3$ )  $\delta$  8.54 (br, 1H), 7.57 (d,  $J$  = 8.1 Hz, 2H), 7.23 – 7.10 (m, 3H), 6.97 – 6.87 (m, 2H), 6.80 (dt,  $J$  = 9.6, 2.1 Hz, 1H), 6.74 – 6.68 (m, 1H), 6.03 (q,  $J$  = 3.0 Hz, 1H), 5.68 – 5.49 (m, 2H), 5.45 – 5.31 (m, 1H), 2.38 (s, 3H);  $^{13}\text{C NMR}$  (75 MHz,  $\text{CDCl}_3$ )  $\delta$  143.7, 141.3, 137.0, 130.2, 130.1, 130.0, 129.6, 127.2, 123.1, 119.1, 115.0, 114.7, 114.4, 108.3, 55.5, 21.6. HRMS(ESI+)  $m/z$  calcd for  $\text{C}_{18}\text{H}_{18}\text{FN}_2\text{O}_2\text{S}$  ( $[\text{M}+\text{H}]^+$ ) : 345.1068, found: 345.1067.

**(*R*)-*N*-[pyrrol-2-yl-(2-chlorophenyl)methyl]-4-methylbenzenesulfonamide(6m)**

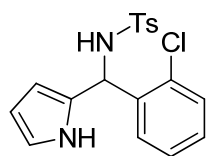

Reaction time: 48 h, white solid, 60% yield, mp: 132-133 °C,  $[\alpha]_{\text{D}}^{20}$  = -39.0 (*c* 1.0, Acetone), 99% *ee* [Daicel Chiralpak AD-H column, *n*-hexane/*i*-PrOH = 60 : 40, 1.0 mL/min,  $\lambda$  = 254 nm,  $t(\text{major})$  = 7.72 min,  $t(\text{minor})$  = 23.83 min];  $^1\text{H NMR}$  (300 MHz,  $\text{CDCl}_3$ )  $\delta$  8.50 (br, 1H), 7.60 (d,  $J$  = 8.1 Hz, 2H), 7.25 – 7.09 (m, 6H), 6.78 – 6.63 (m, 1H), 6.03 (q,  $J$  = 3.0 Hz, 1H), 5.95 (d,  $J$  = 8.4 Hz, 1H), 5.57 – 5.47 (m, 1H), 5.40 (d,  $J$  = 8.4 Hz, 1H), 2.36 (s, 3H);  $^{13}\text{C NMR}$  (75 MHz,  $\text{DMSO-d}_6$ )  $\delta$  142.1, 138.3, 137.5, 131.5, 129.4, 129.0, 128.9, 128.7, 128.4, 126.9, 126.2, 118.3, 107.2, 51.8, 20.9. HRMS(ESI+)  $m/z$  calcd for



$C_{18}H_{18}ClN_2O_2S$  ( $[M+H]^+$ ) : 361.0772, found: 361.0773.

**(R)-N-[pyrrol-2-yl-(3-chlorophenyl)methyl]-4-methylbenzenesulfonamide (6n)**

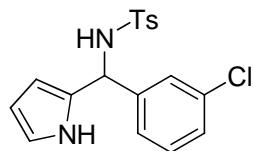

Reaction time: 10 h, pale yellow gum, 98% yield,  $[\alpha]_D^{20} = -5.4$  ( $c$  1.0, Acetone), 98% *ee* [Daicel Chiralpak AD-H column, *n*-hexane/*i*-PrOH = 60 : 40, 1.0 mL/min,  $\lambda = 254$  nm,  $t(\text{major}) = 6.15$  min,  $t(\text{minor}) = 7.18$  min];  $^1H$  NMR (300 MHz,  $CDCl_3$ )  $\delta$  8.57 (br, 1H), 7.54 (dd,  $J = 8.4, 2.1$  Hz, 2H), 7.23 – 7.09 (m, 4H), 7.08 – 6.96 (m, 2H), 6.76 – 6.69 (m, 1H), 6.07 – 5.99 (m, 1H), 5.65 – 5.58 (m, 1H), 5.55 (d,  $J = 8.1$  Hz, 1H), 5.50 – 5.32 (m, 1H), 2.39 (s, 3H);  $^{13}C$  NMR (75 MHz,  $CDCl_3$ )  $\delta$  143.6, 140.4, 136.7, 134.2, 129.7, 129.7, 129.4, 127.8, 127.5, 127.0, 125.6, 118.9, 108.3, 55.4, 21.4. HRMS(ESI+)  $m/z$  calcd for  $C_{18}H_{18}ClN_2O_2S$  ( $[M+H]^+$ ) : 361.0772, found: 361.0772.

**(R)-N-[pyrrol-2-yl-(2-bromophenyl)methyl]-4-methylbenzenesulfonamide(6o)**

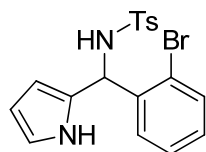

Reaction time: 48 h, white solid, 80% yield, mp: 135-136 °C,  $[\alpha]_D^{20} = -2.8$  ( $c$  1.0, Acetone), 96% *ee* [Daicel Chiralpak AD-H column, *n*-hexane/*i*-PrOH = 60 : 40, 1.0 mL/min,  $\lambda = 254$  nm,  $t(\text{major}) = 7.82$  min,  $t(\text{minor}) = 26.15$  min];  $^1H$  NMR (300 MHz,  $CDCl_3$ )  $\delta$  8.57 (br, 1H), 7.60 (d,  $J = 8.3$  Hz, 2H), 7.40 (d,  $J = 7.9$  Hz, 1H), 7.34 – 7.02 (m, 5H), 6.72 (s, 1H), 6.19 – 5.84 (m, 2H), 5.77 – 5.49 (m, 2H), 2.34 (s, 3H);  $^{13}C$  NMR (75 MHz,  $CDCl_3$ )  $\delta$  143.45, 137.88, 136.64, 132.88, 129.42, 129.17, 129.11, 127.58, 127.14, 122.98, 118.79, 108.34, 107.96, 55.18, 21.44. HRMS(ESI+)  $m/z$  calcd for  $C_{18}H_{18}BrN_2O_2S$  ( $[M+H]^+$ ) : 405.0267, found: 405.0266.

**(R)-N-[pyrrol-2-yl-(3-bromophenyl)methyl]-4-methylbenzenesulfonamide(6p)**

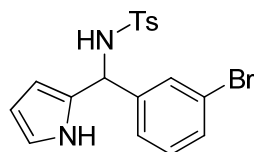

Reaction time: 20 h, pale yellow solid, 93% yield, mp: 126-127 °C,  $[\alpha]_D^{20} = -2.8$  ( $c$  1.0, Acetone), 97% *ee* [Daicel Chiralpak AD-H column, *n*-hexane/*i*-PrOH = 60 : 40, 1.0

mL/min,  $\lambda = 254$  nm,  $t(\text{major}) = 6.25$  min,  $t(\text{minor}) = 7.48$  min];  $^1\text{H NMR}$  (300 MHz,  $\text{CDCl}_3$ )  $\delta$  8.59 (br, 1H), 7.53 (d,  $J = 8.4$  Hz, 2H), 7.36 – 7.28 (m, 1H), 7.18 – 6.99 (m, 5H), 6.77 – 6.65 (m, 1H), 6.03 (q,  $J = 3.0$  Hz, 1H), 5.63 – 5.57 (m, 1H), 5.54 (d,  $J = 8.4$  Hz, 1H), 5.45 (d,  $J = 8.1$  Hz, 1H), 2.39 (s, 3H);  $^{13}\text{C NMR}$  (75 MHz,  $\text{CDCl}_3$ )  $\delta$  143.8, 140.8, 136.9, 130.9, 130.5, 130.1, 129.9, 129.6, 127.1, 126.2, 122.5, 119.1, 108.4, 55.5, 21.7. HRMS(ESI+)  $m/z$  calcd for  $\text{C}_{18}\text{H}_{18}\text{BrN}_2\text{O}_2\text{S}$  ( $[\text{M}+\text{H}]^+$ ) : 405.0267, found: 405.0267.

**(R)-N-[pyrrol-2-yl-(2-nitrophenyl)methyl]-4-methylbenzenesulfonamide(6q)**

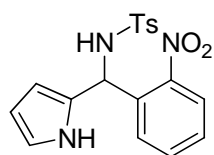

Reaction time: 48 h, white solid, 70% yield, mp: 122-123 °C,  $[\alpha]_{\text{D}}^{20} = -38.0$  ( $c$  1.0, Acetone), 97% *ee* [Daicel Chiralpak AD-H column, *n*-hexane/*i*-PrOH = 60 : 40, 1.0 mL/min,  $\lambda = 254$  nm,  $t(\text{major}) = 10.08$  min,  $t(\text{minor}) = 30.13$  min];  $^1\text{H NMR}$  (300 MHz,  $\text{CDCl}_3$ )  $\delta$  8.48 (br, 1H), 7.84 (dd,  $J = 8.1, 1.3$  Hz, 1H), 7.62 (d,  $J = 8.3$  Hz, 2H), 7.58 – 7.45 (m, 2H), 7.42 – 7.35 (m, 1H), 7.19 (d,  $J = 8.1$  Hz, 2H), 6.67 (dd,  $J = 4.1, 2.6$  Hz, 1H), 6.22 (d,  $J = 7.6$  Hz, 1H), 5.98 (dd,  $J = 5.9, 2.8$  Hz, 1H), 5.75 (d,  $J = 7.8$  Hz, 1H), 5.54 (dd,  $J = 3.4, 2.7$  Hz, 1H), 2.38 (s, 3H);  $^{13}\text{C NMR}$  (75 MHz,  $\text{DMSO-d}_6$ )  $\delta$  142.79, 138.59, 131.37, 129.30, 128.22, 124.85, 124.50, 123.71, 123.41, 121.86, 119.67, 113.69, 103.22, 101.93, 46.66, 16.28. HRMS(ESI+)  $m/z$  calcd for  $\text{C}_{18}\text{H}_{18}\text{N}_3\text{O}_4\text{S}$  ( $[\text{M}+\text{H}]^+$ ) : 372.1013, found: 372.1011.

**(R)-N-[pyrrol-2-yl-(2-naphthyl)methyl]-4-methylbenzenesulfonamide (6r)**

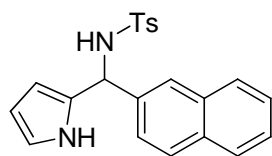

Reaction time: 12 h, yellow solid, 93% yield, mp: 114-115 °C,  $[\alpha]_{\text{D}}^{20} = -10.6$  ( $c$  1.0, Acetone), 98% *ee* [Daicel Chiralpak AD-H column, *n*-hexane/ethanol = 90 : 10, 1.0 mL/min,  $\lambda = 254$  nm,  $t(\text{major}) = 37.03$  min,  $t(\text{minor}) = 40.42$  min];  $^1\text{H NMR}$  (300 MHz,  $\text{CDCl}_3$ )  $\delta$  8.53 (br, 1H), 7.83 – 7.73 (m, 1H), 7.74 – 7.62 (m, 2H), 7.59 – 7.52 (m, 2H), 7.51 – 7.43 (m, 3H), 7.22 (dd,  $J = 8.4, 1.8$  Hz, 1H), 7.03 (d,  $J = 8.1$  Hz, 2H), 6.78 – 6.70 (m, 1H), 6.06 (q,  $J = 3.0$  Hz, 1H), 5.71 (d,  $J = 8.1$  Hz, 1H), 5.67 – 5.61 (m, 1H), 5.25 – 5.10 (m, 1H), 2.25 (s, 3H);  $^{13}\text{C NMR}$  (75 MHz,  $\text{CDCl}_3$ )  $\delta$  143.4, 137.1, 135.8, 133.1, 132.9, 130.5, 129.4,

128.5, 128.1, 127.6, 127.2, 126.6, 126.3, 125.2, 118.8, 108.4, 108.3, 56.2, 21.4.  
 HRMS(ESI+)  $m/z$  calcd for  $C_{22}H_{21}N_2O_2S$  ( $[M+H]^+$ ) : 377.1318, found: 377.1317.

#### 4. Supplementary Data of the Comparison of the Catalysts and Molecular Sieves

**Supplementary Table 1.** The comparison of the catalysts

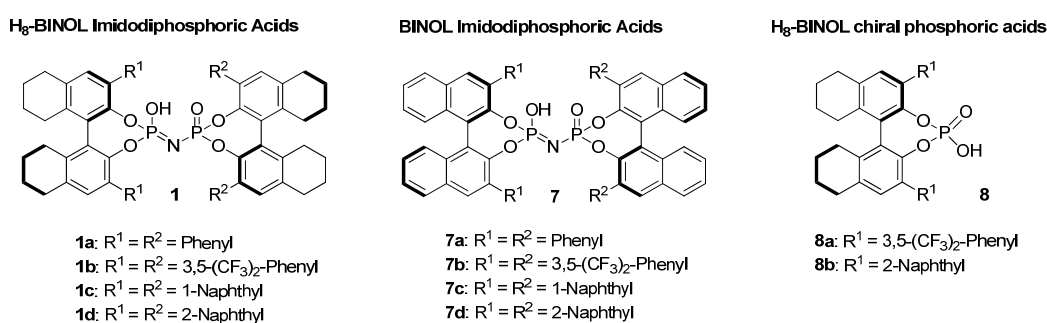

#### Part 1: Aza-Friedel–Crafts reaction of pyrrole **2a** and enamide **3a**

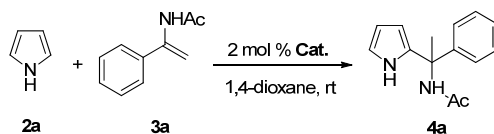

| Entry | Cat.      | Time [h] | Yield [%] <sup>b</sup> | ee[%] <sup>c</sup> |
|-------|-----------|----------|------------------------|--------------------|
| 1     | <b>1c</b> | 1        | 60                     | 87                 |
| 2     | <b>1d</b> | 1        | 65                     | 93                 |
| 3     | <b>7c</b> | 1        | 63                     | 20                 |
| 4     | <b>7d</b> | 1        | 60                     | 70                 |
| 5     | <b>8a</b> | 12       | 65                     | 7                  |
| 6     | <b>8b</b> | 5        | 60                     | 17                 |

<sup>a</sup> Reaction conditions: **3a** (0.1 mmol), **2a** (0.11 mmol), 1,4-dioxane (1 mL). <sup>b</sup> Isolated yield. <sup>c</sup> Determined by HPLC analysis on Chiralpak AS-H column.

#### Part 2: Aza-Friedel–Crafts reaction of pyrrole **2a** and imine **5a**

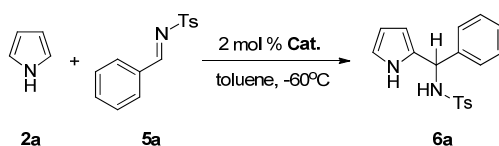

| Entry | Cat.      | Time [h] | Yield [%] <sup>b</sup> | ee [%] <sup>c</sup> |
|-------|-----------|----------|------------------------|---------------------|
| 1     | <b>1a</b> | 32       | 58                     | 57                  |
| 2     | <b>1b</b> | 11       | 82                     | 82                  |
| 3     | <b>1c</b> | 20       | 45                     | 81                  |
| 4     | <b>7a</b> | 5        | 42                     | 25                  |
| 5     | <b>7b</b> | 1        | 80                     | 30                  |
| 6     | <b>7c</b> | 7        | 55                     | 67                  |
| 7     | <b>8a</b> | 6        | 65                     | 4                   |
| 8     | <b>8b</b> | 8        | 60                     | 51                  |

<sup>a</sup> Reaction conditions: **5a** (0.1 mmol), **2a** (0.11 mmol), solvent (1 mL). <sup>b</sup> Isolated yield. <sup>c</sup> Determined by HPLC analysis on Chiralpak AD-H column.

**Supplementary Table 2.** The comparison of the effect of the molecular sieves

Part 1: Aza-Friedel–Crafts reaction of pyrrole **2a** and enamide **3a**

| Entry | M.S. | Time [h] | Yield [%] <sup>b</sup> | ee [%] <sup>c</sup> |
|-------|------|----------|------------------------|---------------------|
| 1     | 3Å   | 2        | 90                     | 95                  |
| 2     | 4Å   | 2        | 89                     | 95                  |
| 3     | 5Å   | 2        | 90                     | 96                  |

<sup>a</sup> Reaction conditions: **3a** (0.1 mmol), **2a** (0.11 mmol), 90 mg M.S., 1,4-dioxane (1 mL). <sup>b</sup> Isolated yield. <sup>c</sup> Determined by HPLC analysis on Chiralpak AS-H column.

Part 2: Aza-Friedel–Crafts reaction of pyrrole **2a** and imine **5a**

| Entry | Cat. | Time [h] | Yield [%] <sup>b</sup> | ee [%] <sup>c</sup> |
|-------|------|----------|------------------------|---------------------|
| 1     | 3Å   | 3        | 92                     | 97                  |
| 2     | 4Å   | 3        | 91                     | 95                  |
| 3     | 5Å   | 3        | 90                     | 98                  |

<sup>a</sup> Reaction conditions: **5a** (0.1 mmol), **2a** (0.11 mmol), 5 mg M.S., toluene (1 mL). <sup>b</sup> Isolated yield. <sup>c</sup> Determined by HPLC analysis on Chiralpak AD-H column.

## 5. Experimental Procedures for Gram-Scale Reactions

**Gram-scale Aza-Friedel-Crafts reaction of 3f and 2a:** Enamide **3f** (1.20 g, 5 mmol), imidodiphosphoric acid **1d** (120 mg, 0.1 mmol, 2 mol %), 5Å molecular sieves (4.5 g) and 1,4-dioxane (50 mL) were loaded into test tube, the solution was stirred for 5 minutes at room temperature and pyrrole **2a** (0.11 mmol) was added. The reaction was complete in 8 hours. The resulting mixture was purified by silica gel chromatography (ethyl acetate/petroleum ether = 1/3) directly to afford the product **4f** (1.32 g, 88 % yield, 97% ee).

**Gram-scale Aza-Friedel-Crafts reaction of 5d and 2a:** Aldimine **5d** (1.37 g, 5 mmol), imidodiphosphoric acid **1b** (23 mg, 0.015 mmol, 0.3 mol %), 5Å molecular sieves (250 mg) and toluene (15 mL) were loaded into test tube, the solution was stirred for 15 minutes at -60 °C and pyrrole **2a** (0.55 mmol) was added. The reaction was complete in 6 hours. The resulting mixture was purified by silica gel chromatography (ethyl acetate/petroleum ether = 1/3) directly to afford the product **6d** (1.70 g, 93 % yield, 98% ee).

The synthesis of enamide **3** and aldimine **5** has been previously reported in literature<sup>1,2</sup>.

### References:

- [1] Reeves, J. T.; Tan, Z.; Han, Z. S.; Li, G.; Zhang, Y.; Xu, Y.; Reeves, D. C.; Gonnella, N. C.; Ma, S.; Lee, H.; Lu, B. Z.; Senanayake, C. H. *Angew. Chem., Int. Ed.* 2012, **51**, 1400-1404
- [2] Chemla, F.; Hebbe, V.; Normant, J.-F. *Synthesis* 2000, 75-77

6. Copies of NMR Spectra

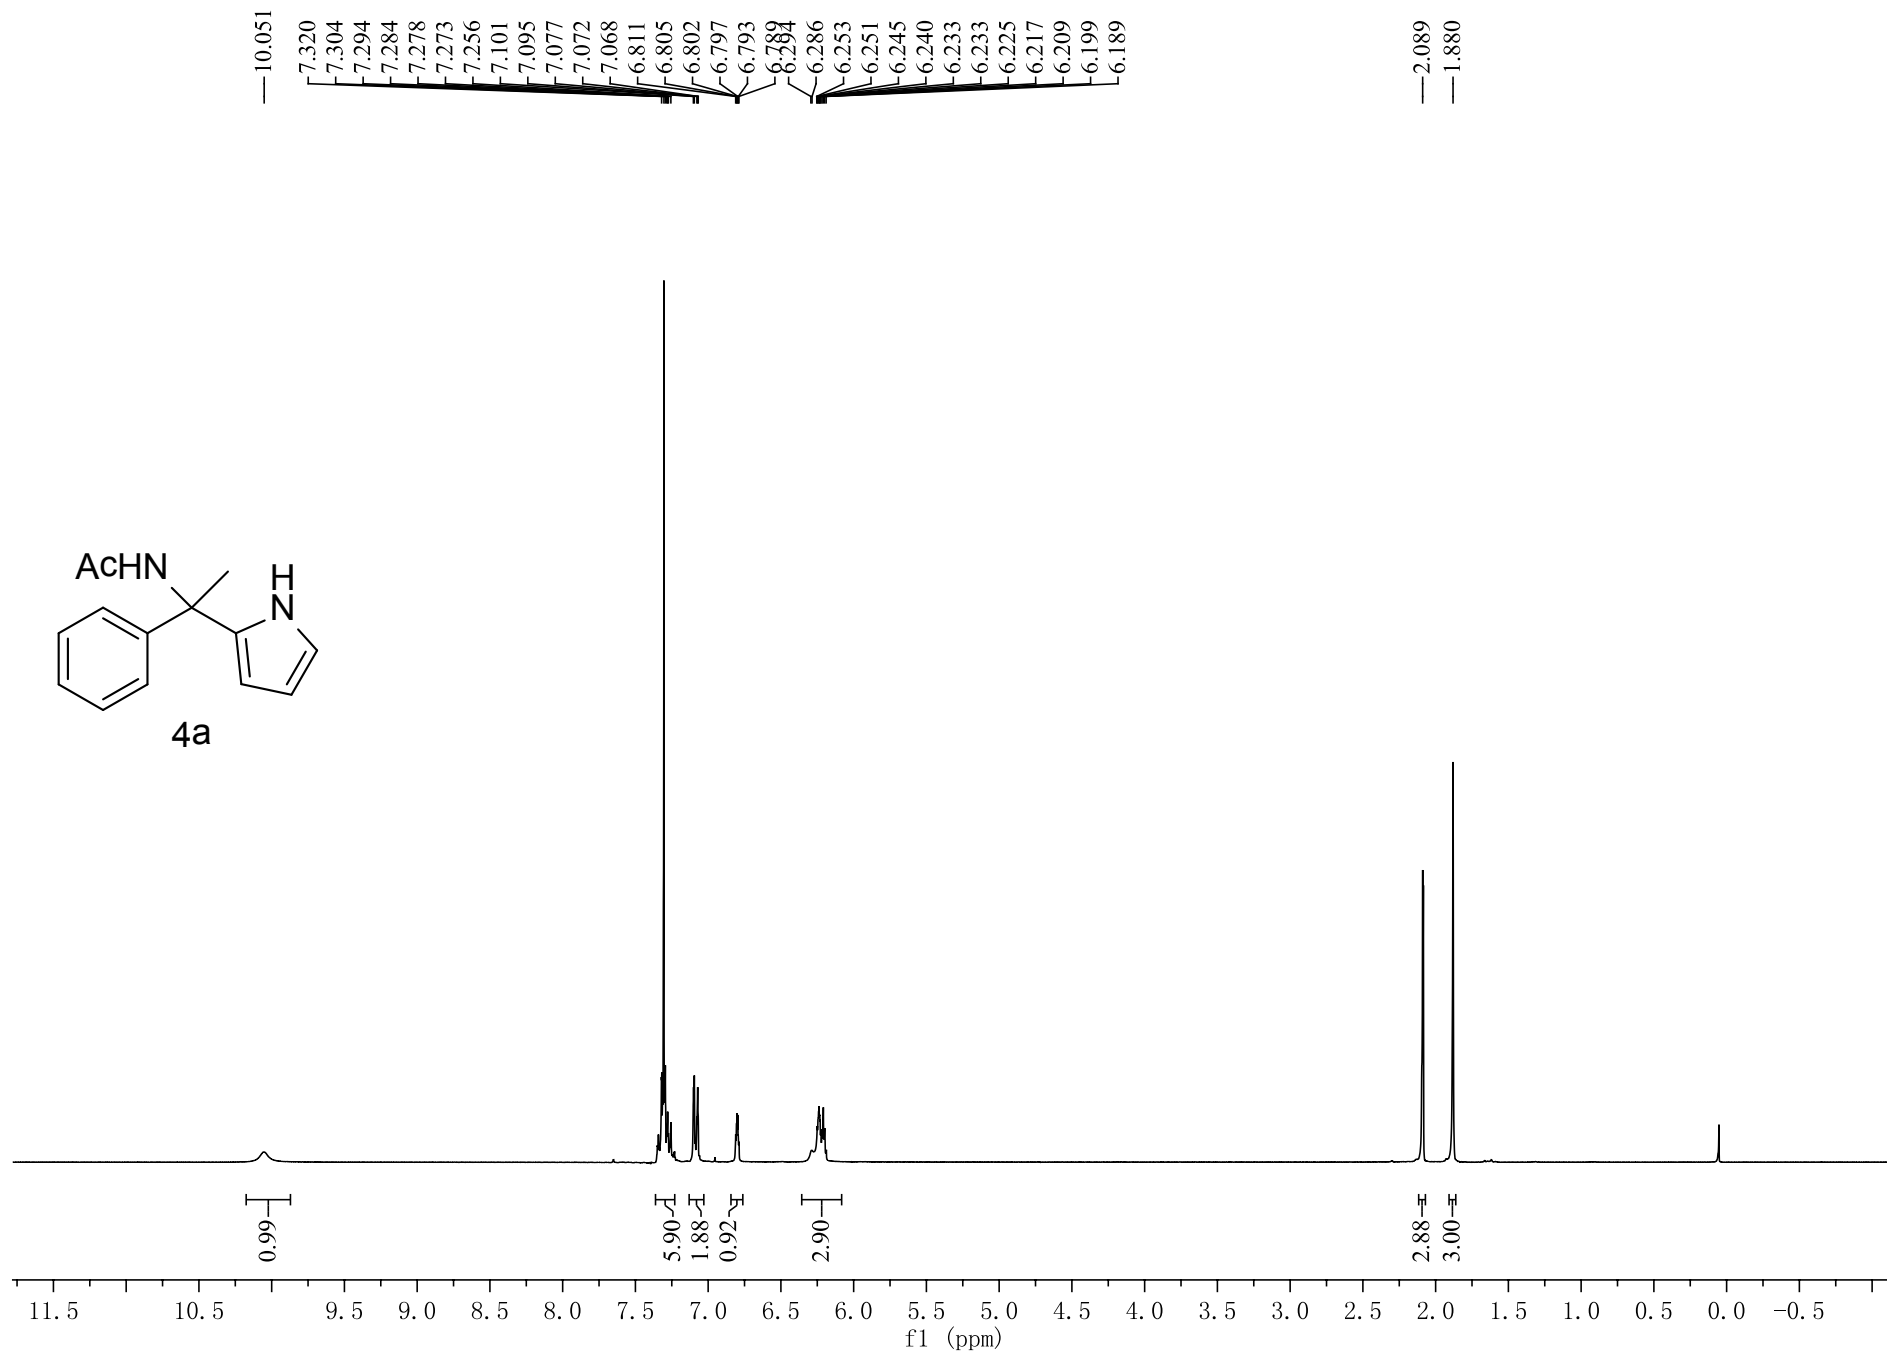

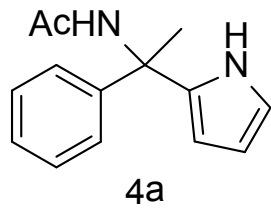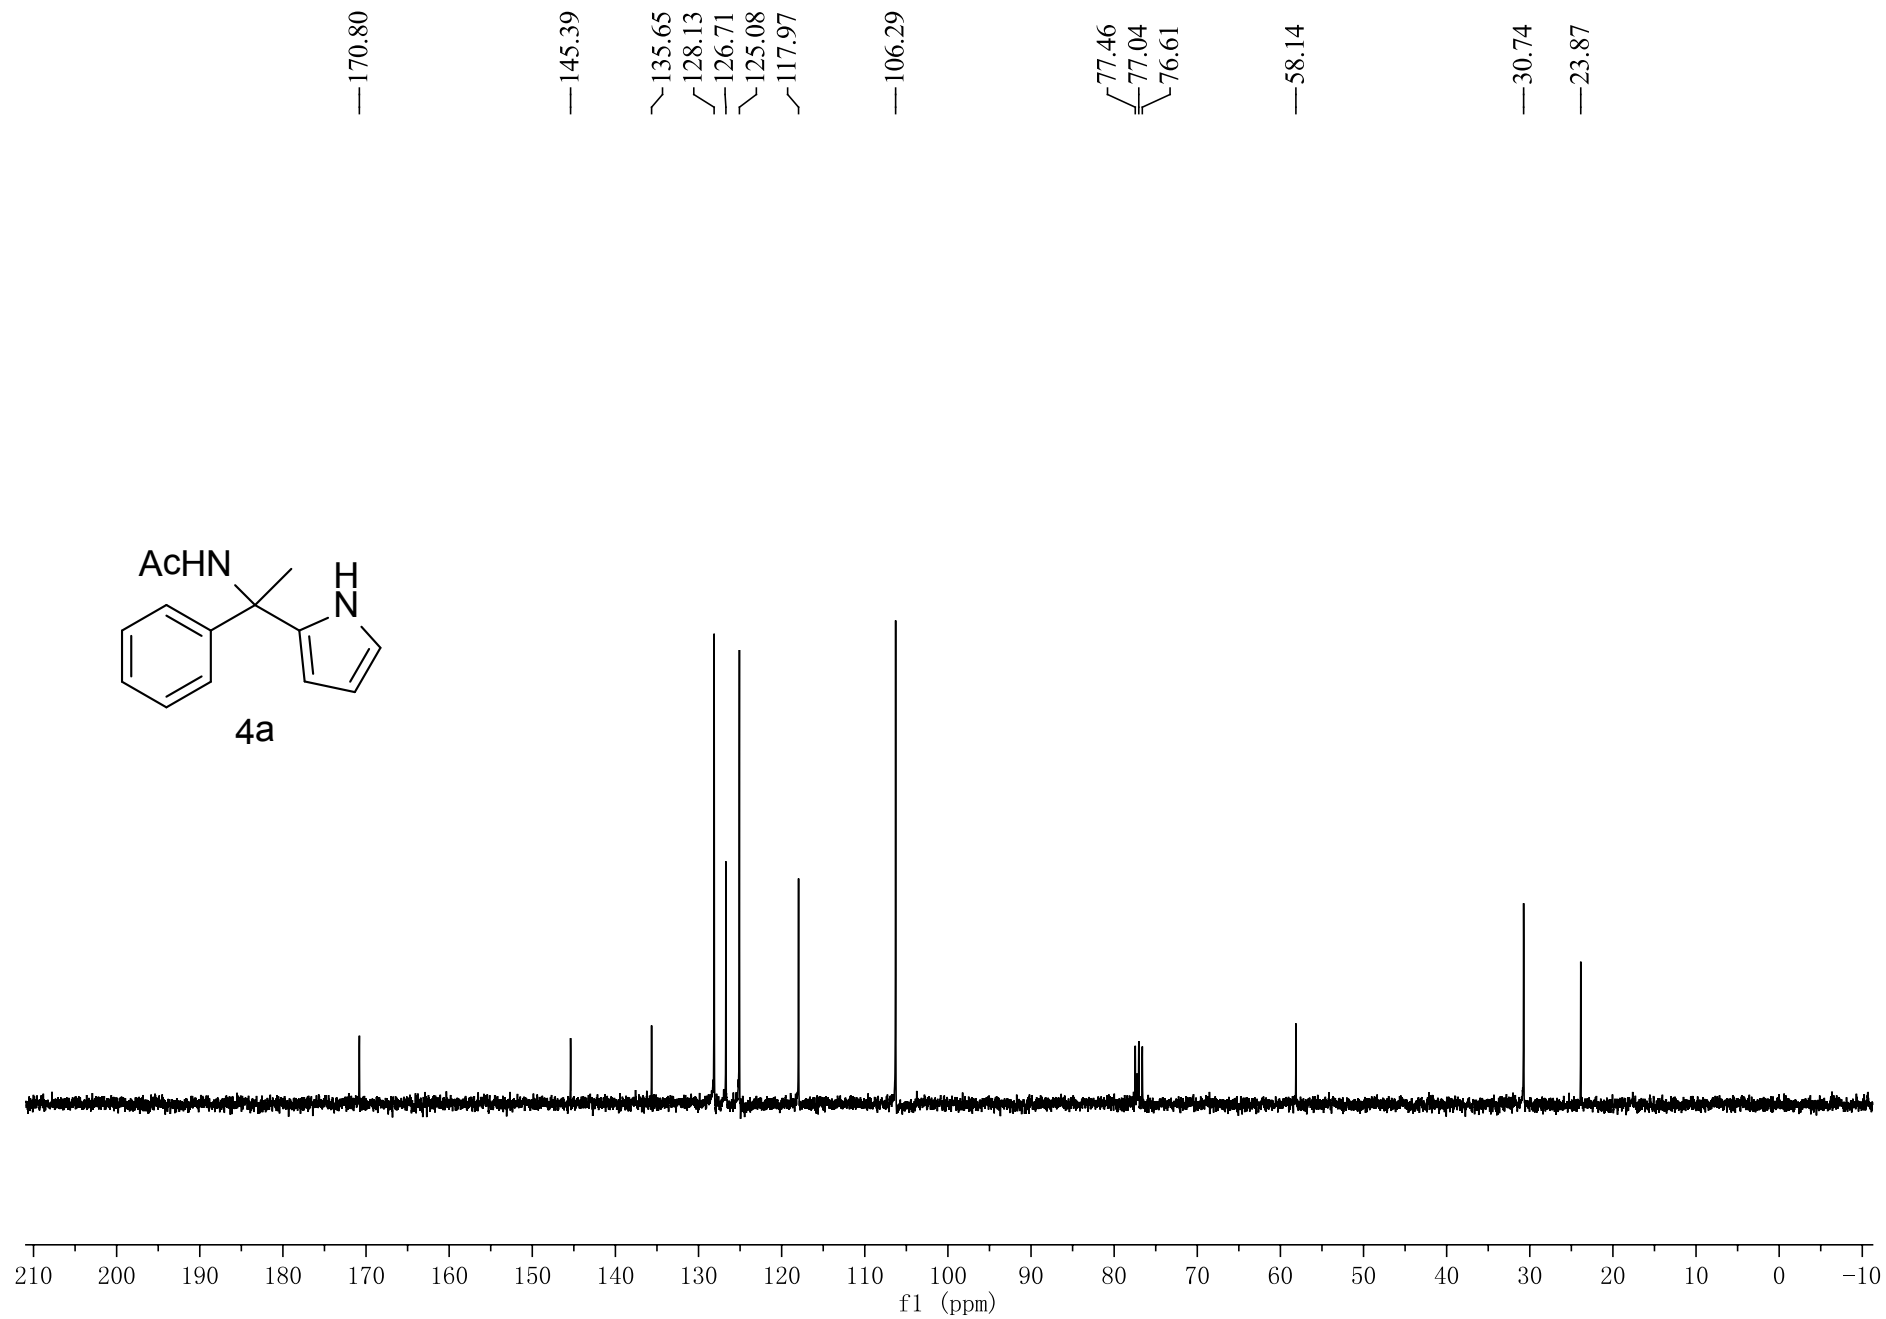

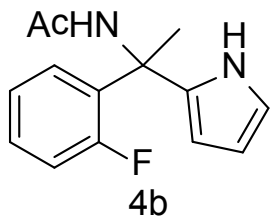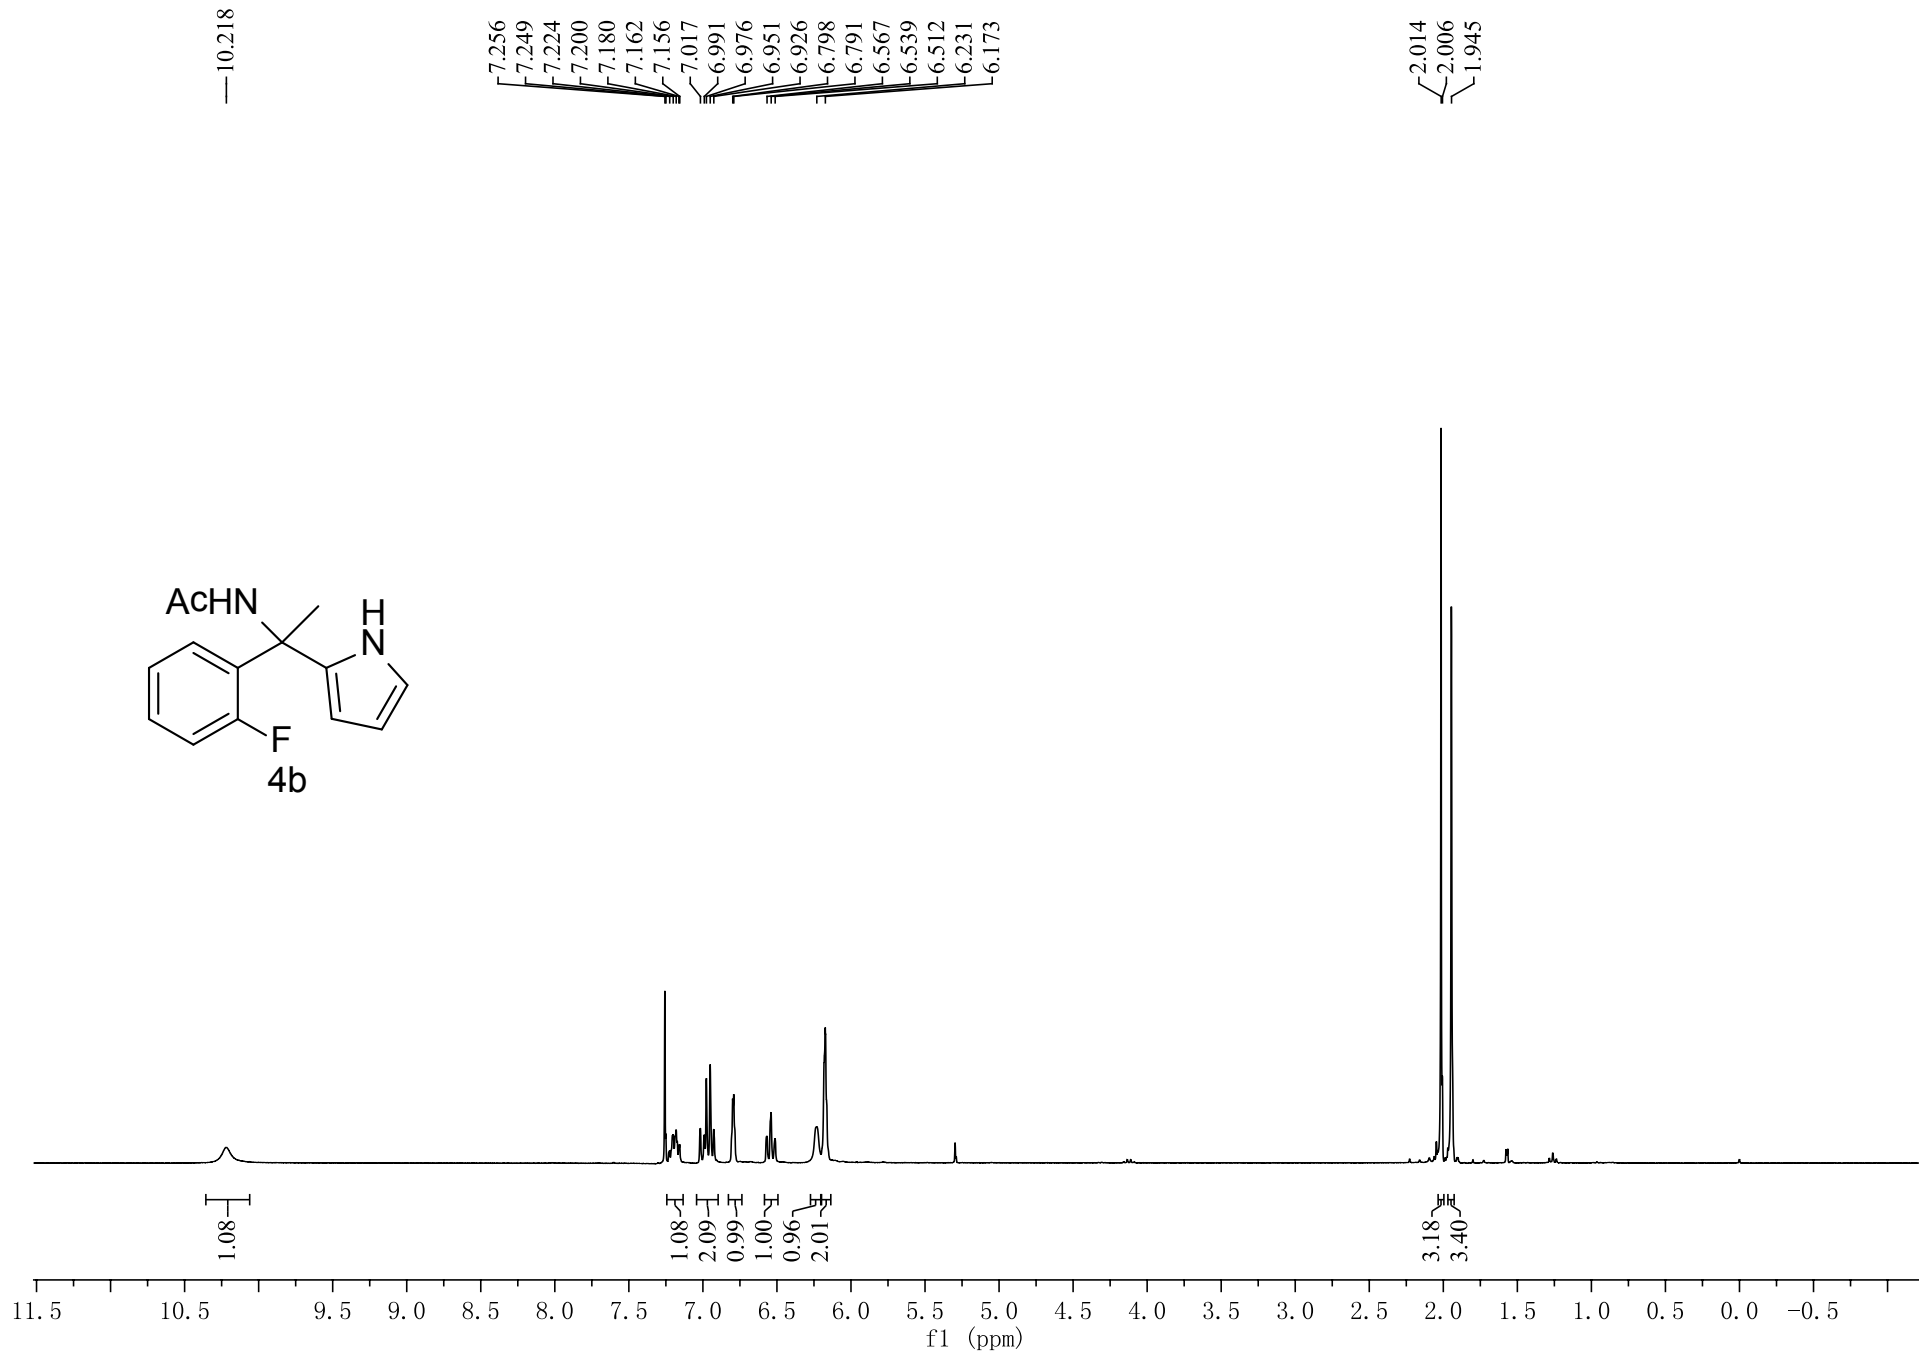



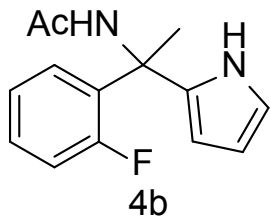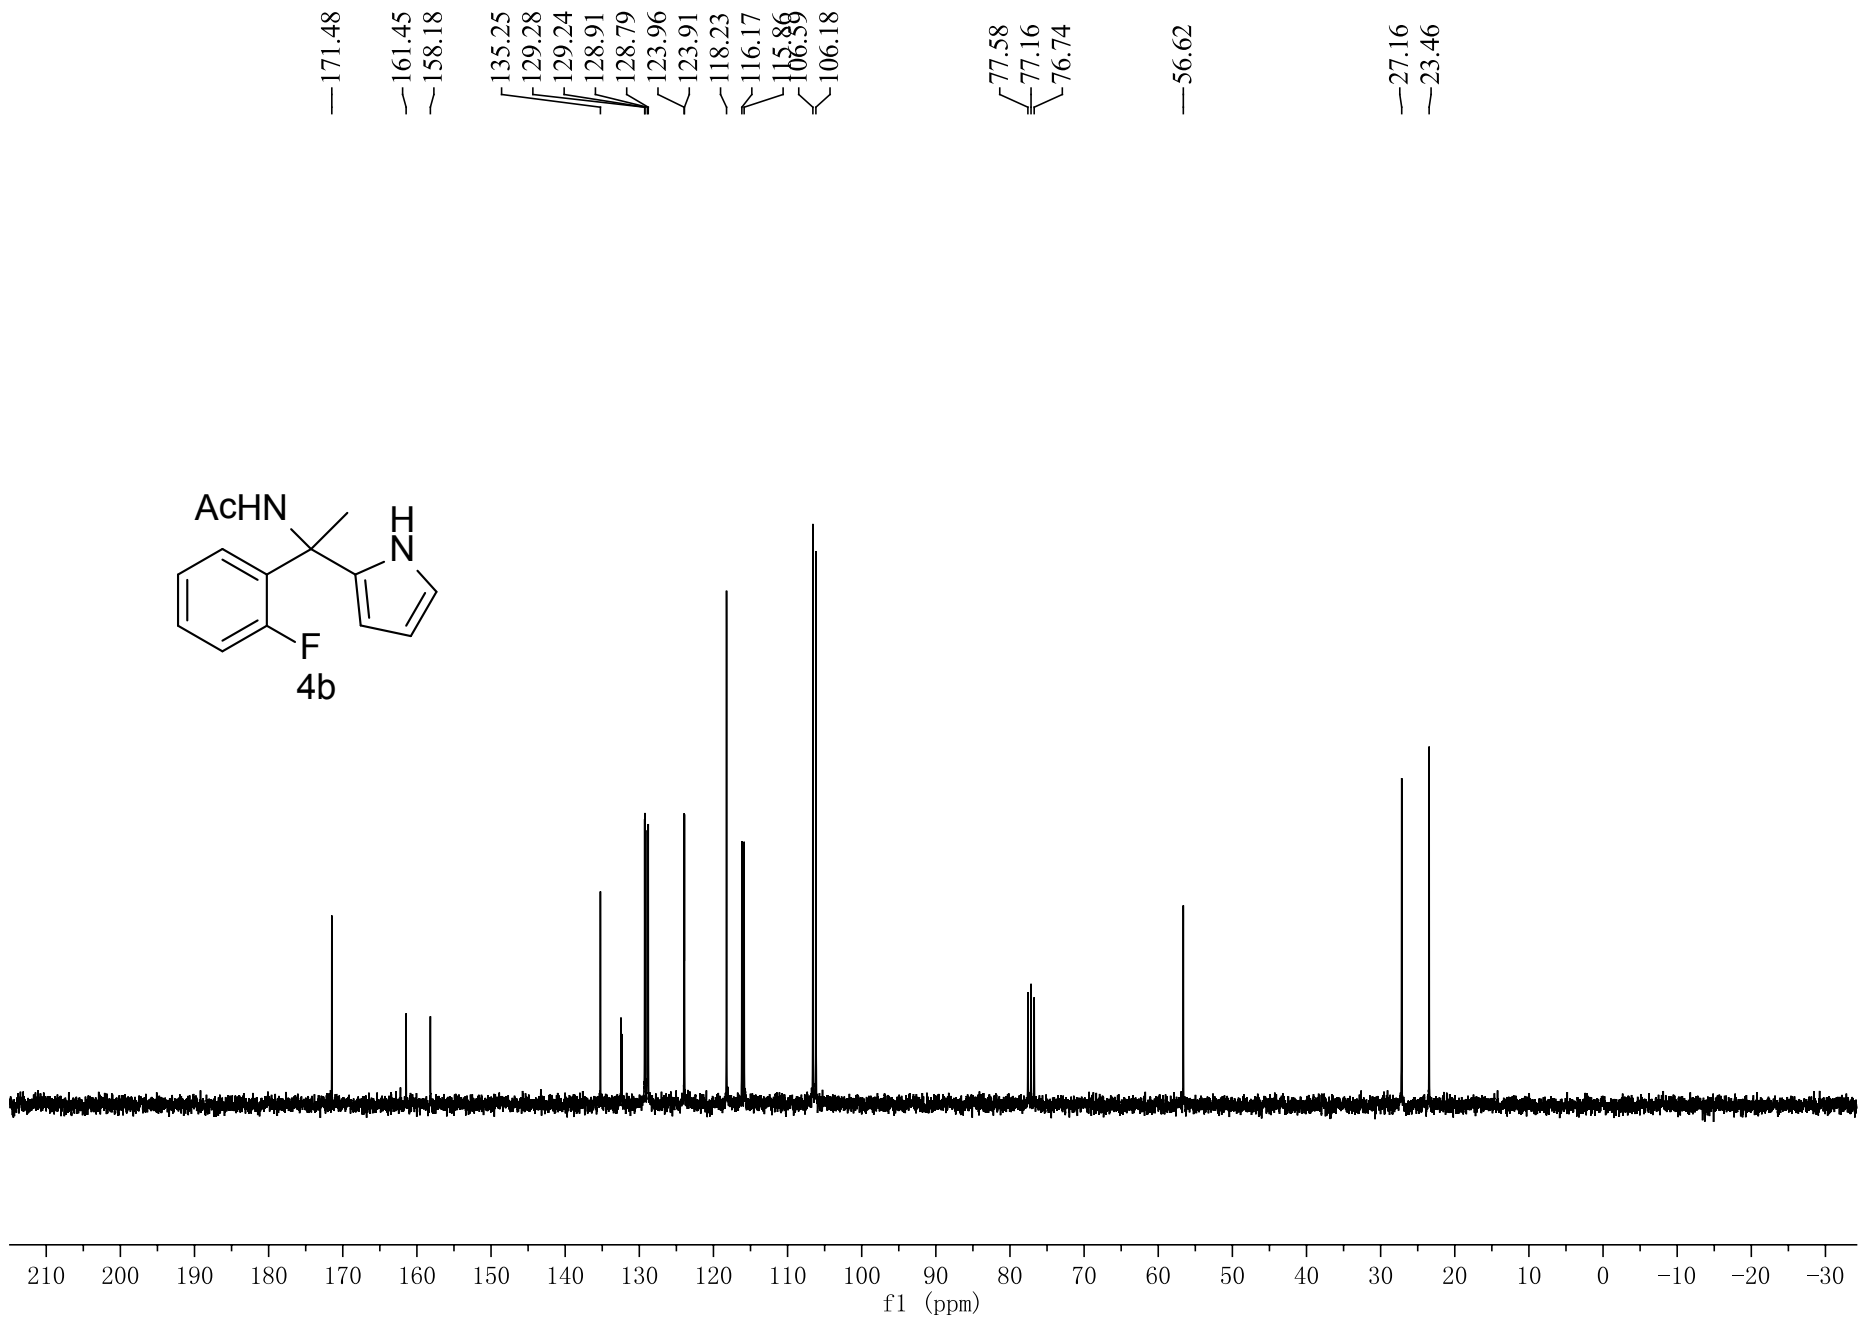

—9.957

6.990  
6.973  
6.961  
6.942  
6.913  
6.884  
6.734  
6.361  
6.349  
6.340  
6.169  
6.156  
6.144  
6.134

—1.992  
—1.774

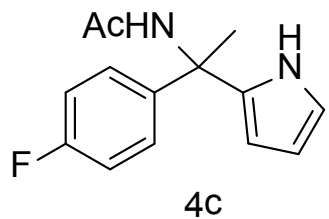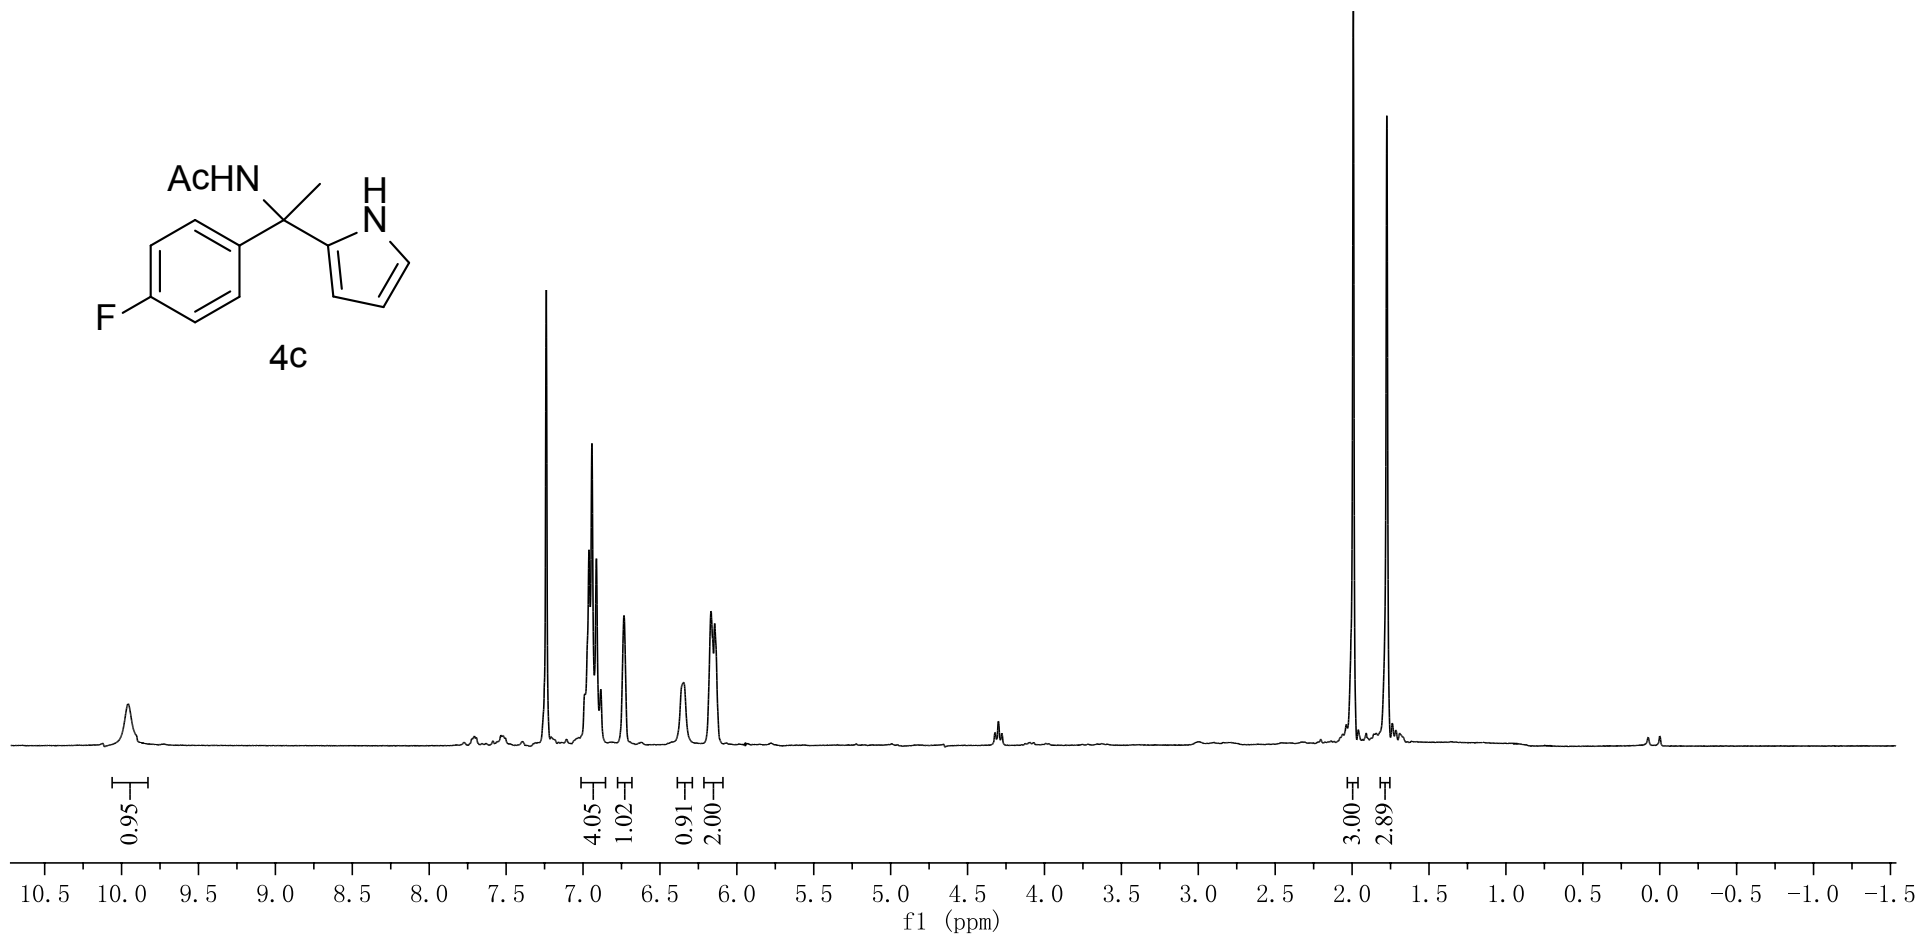

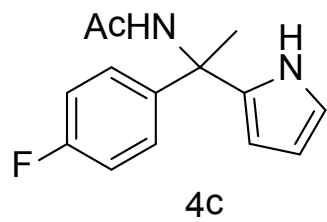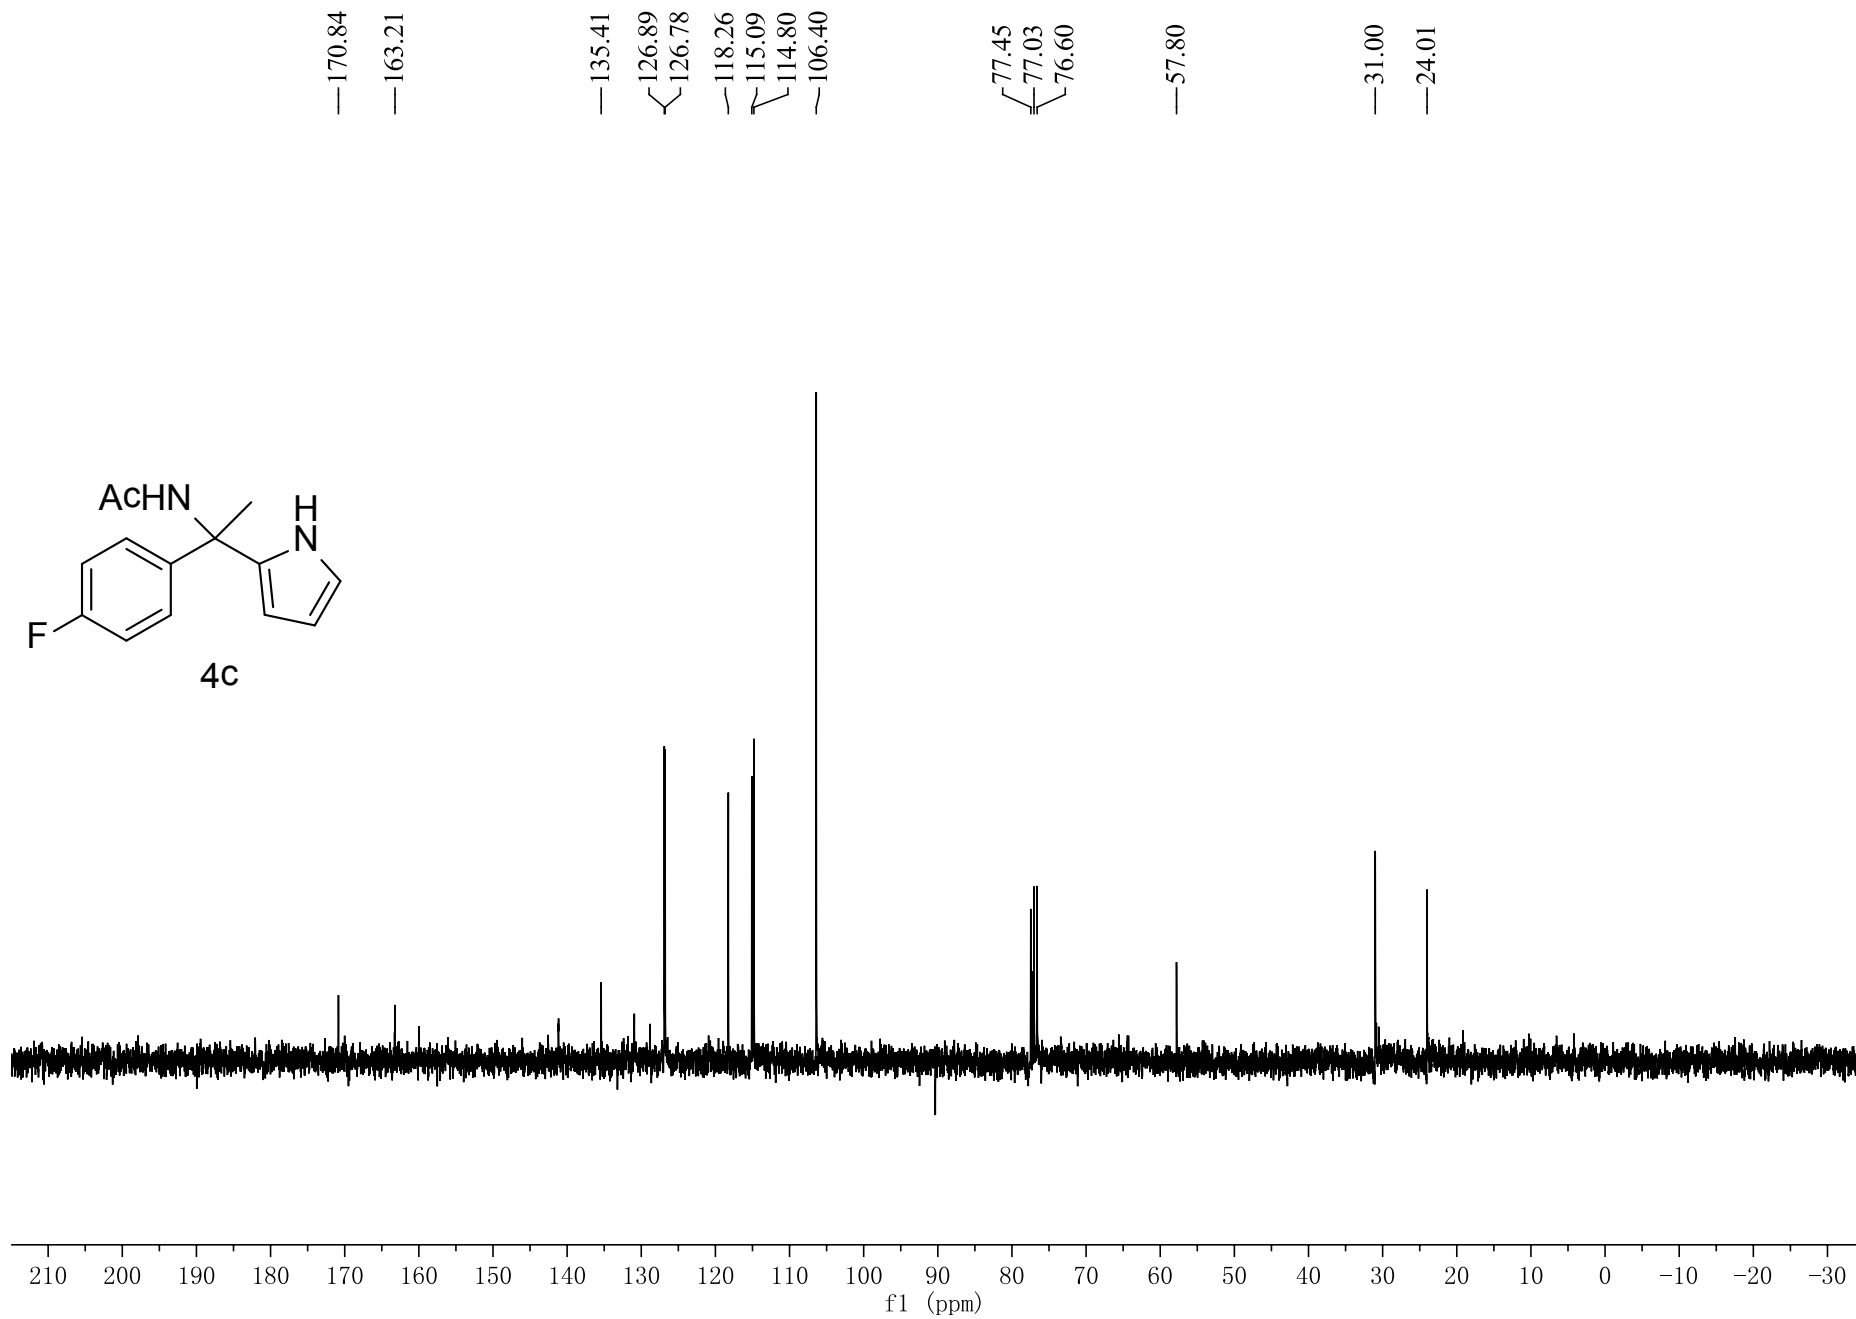

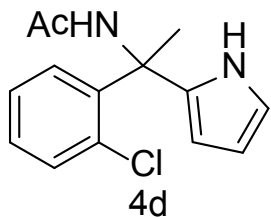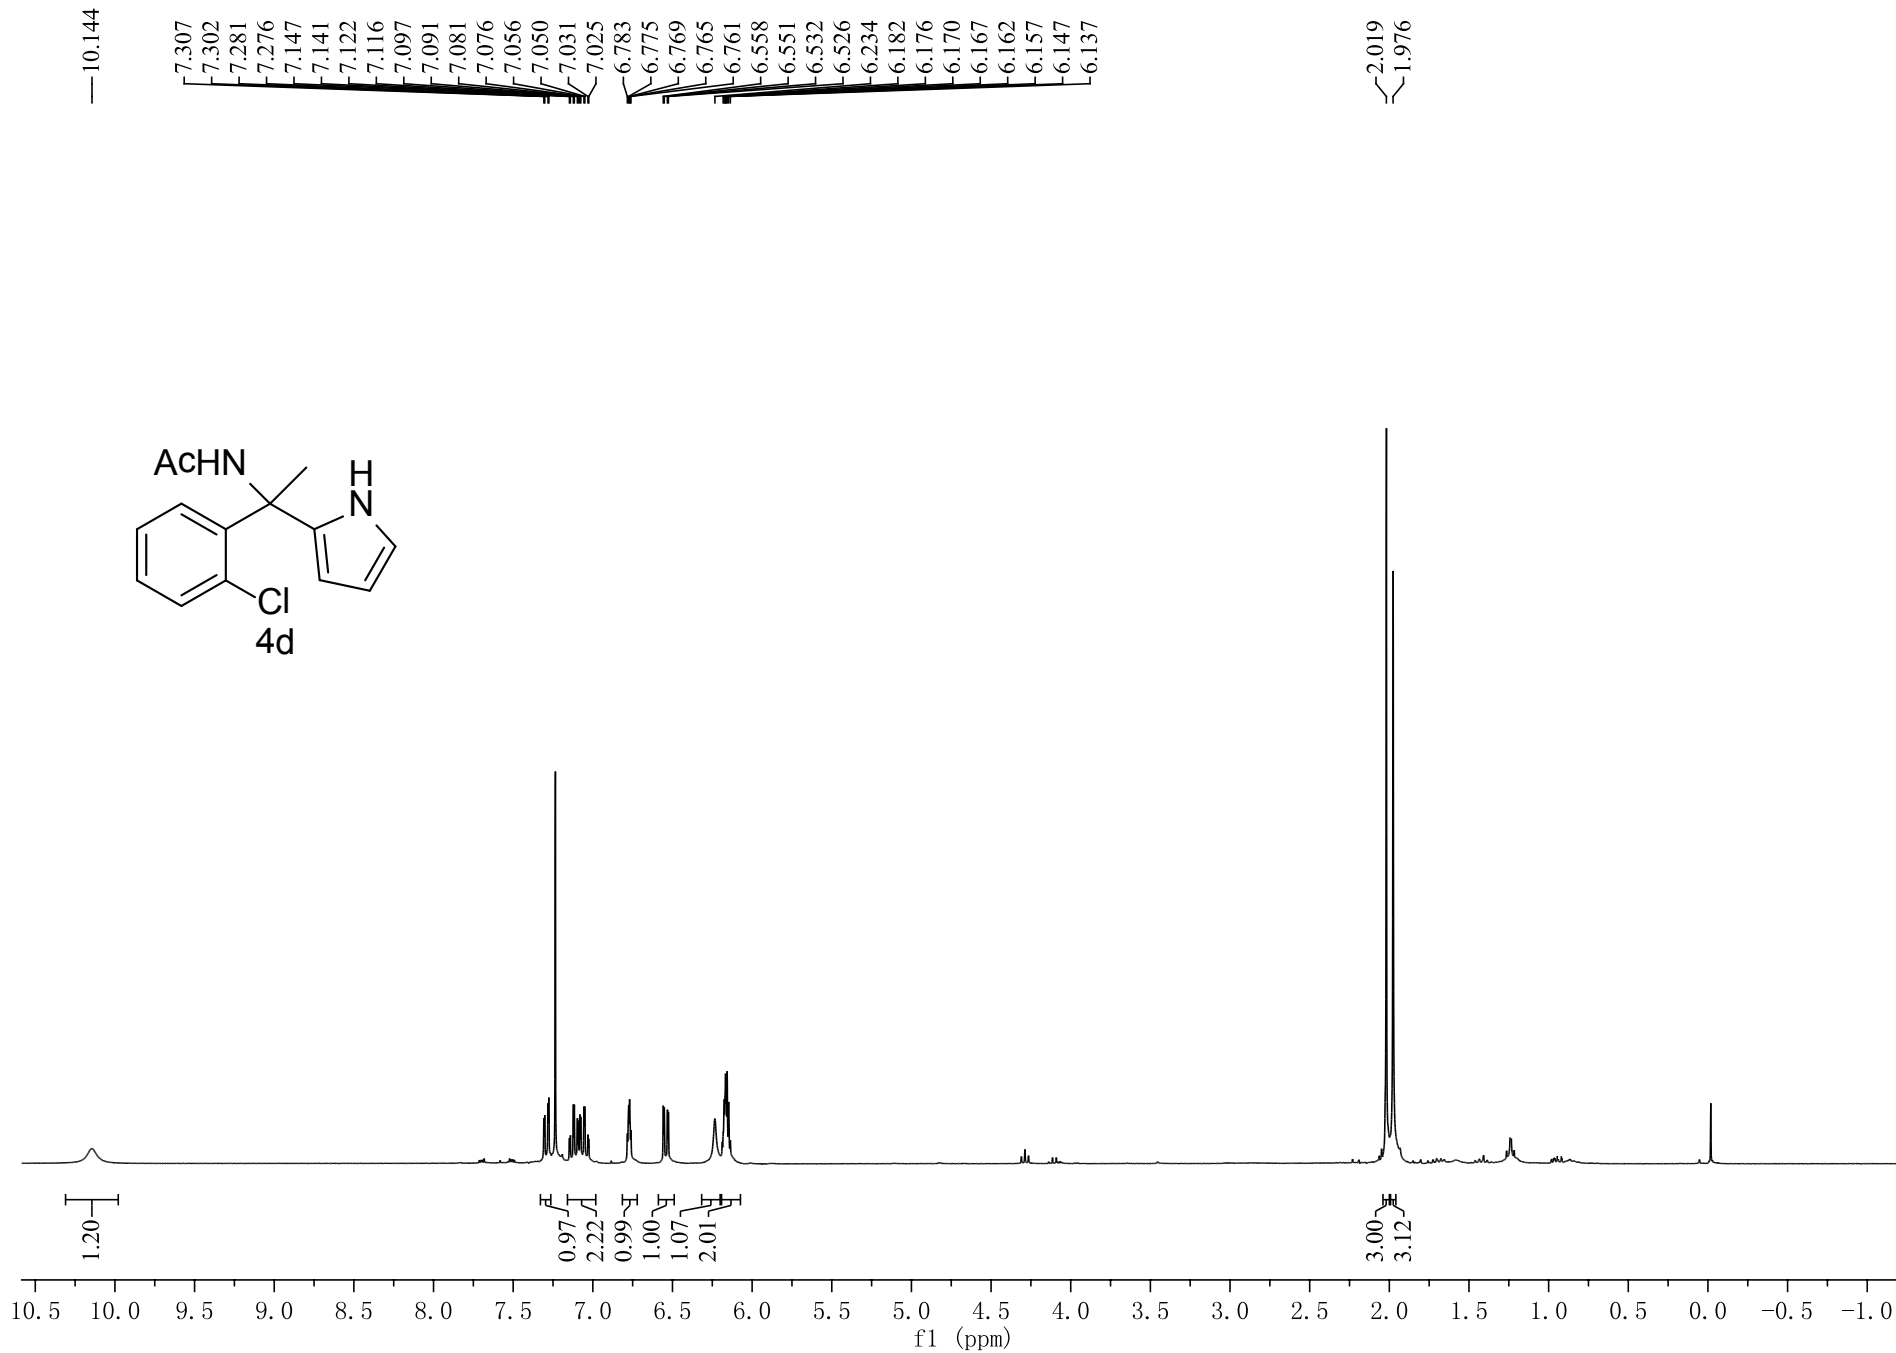

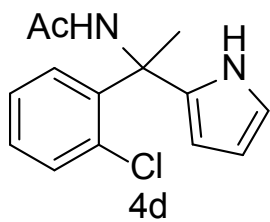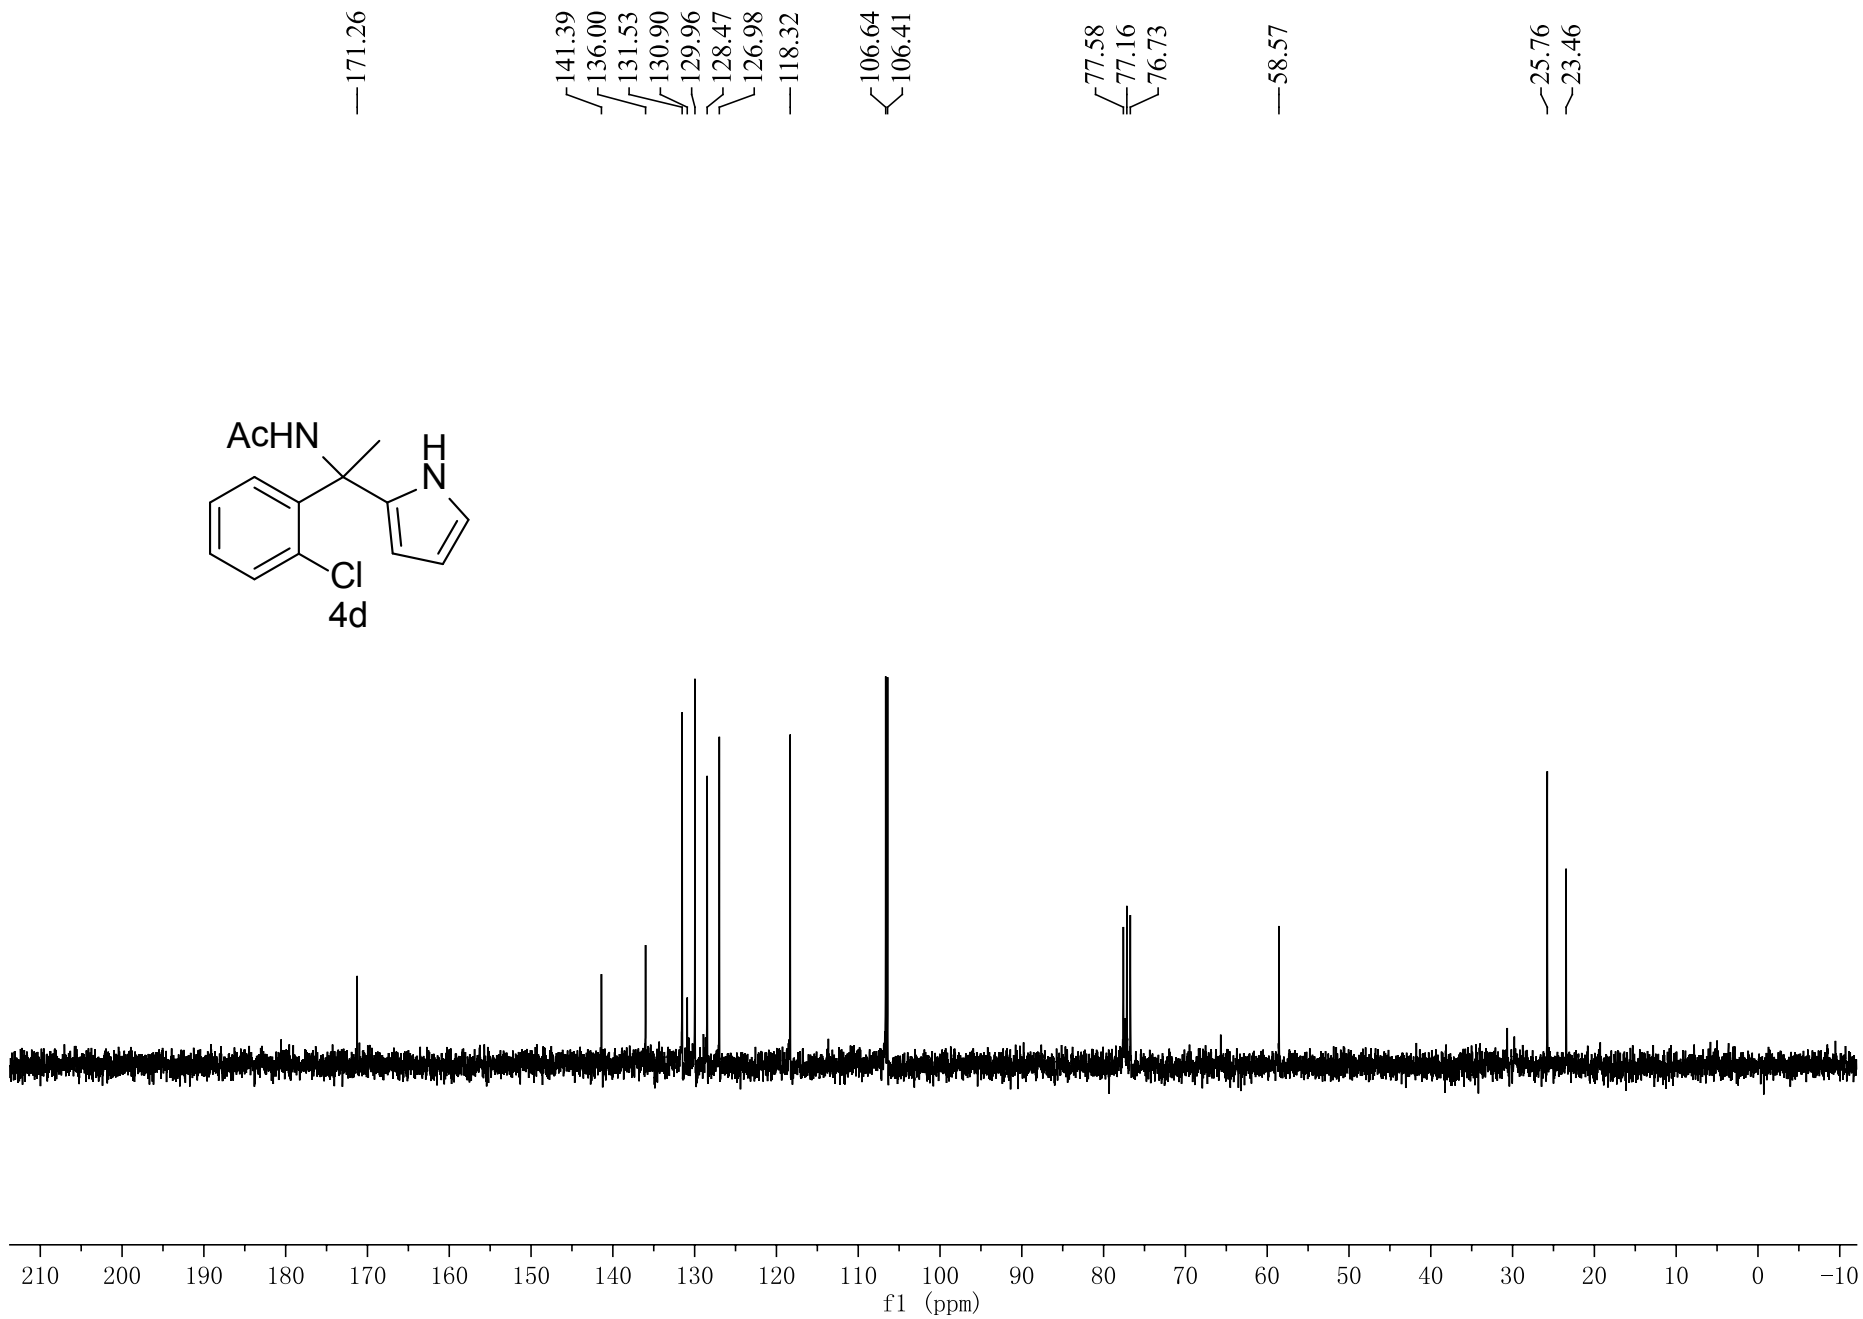

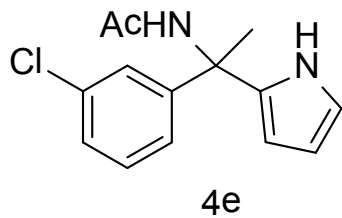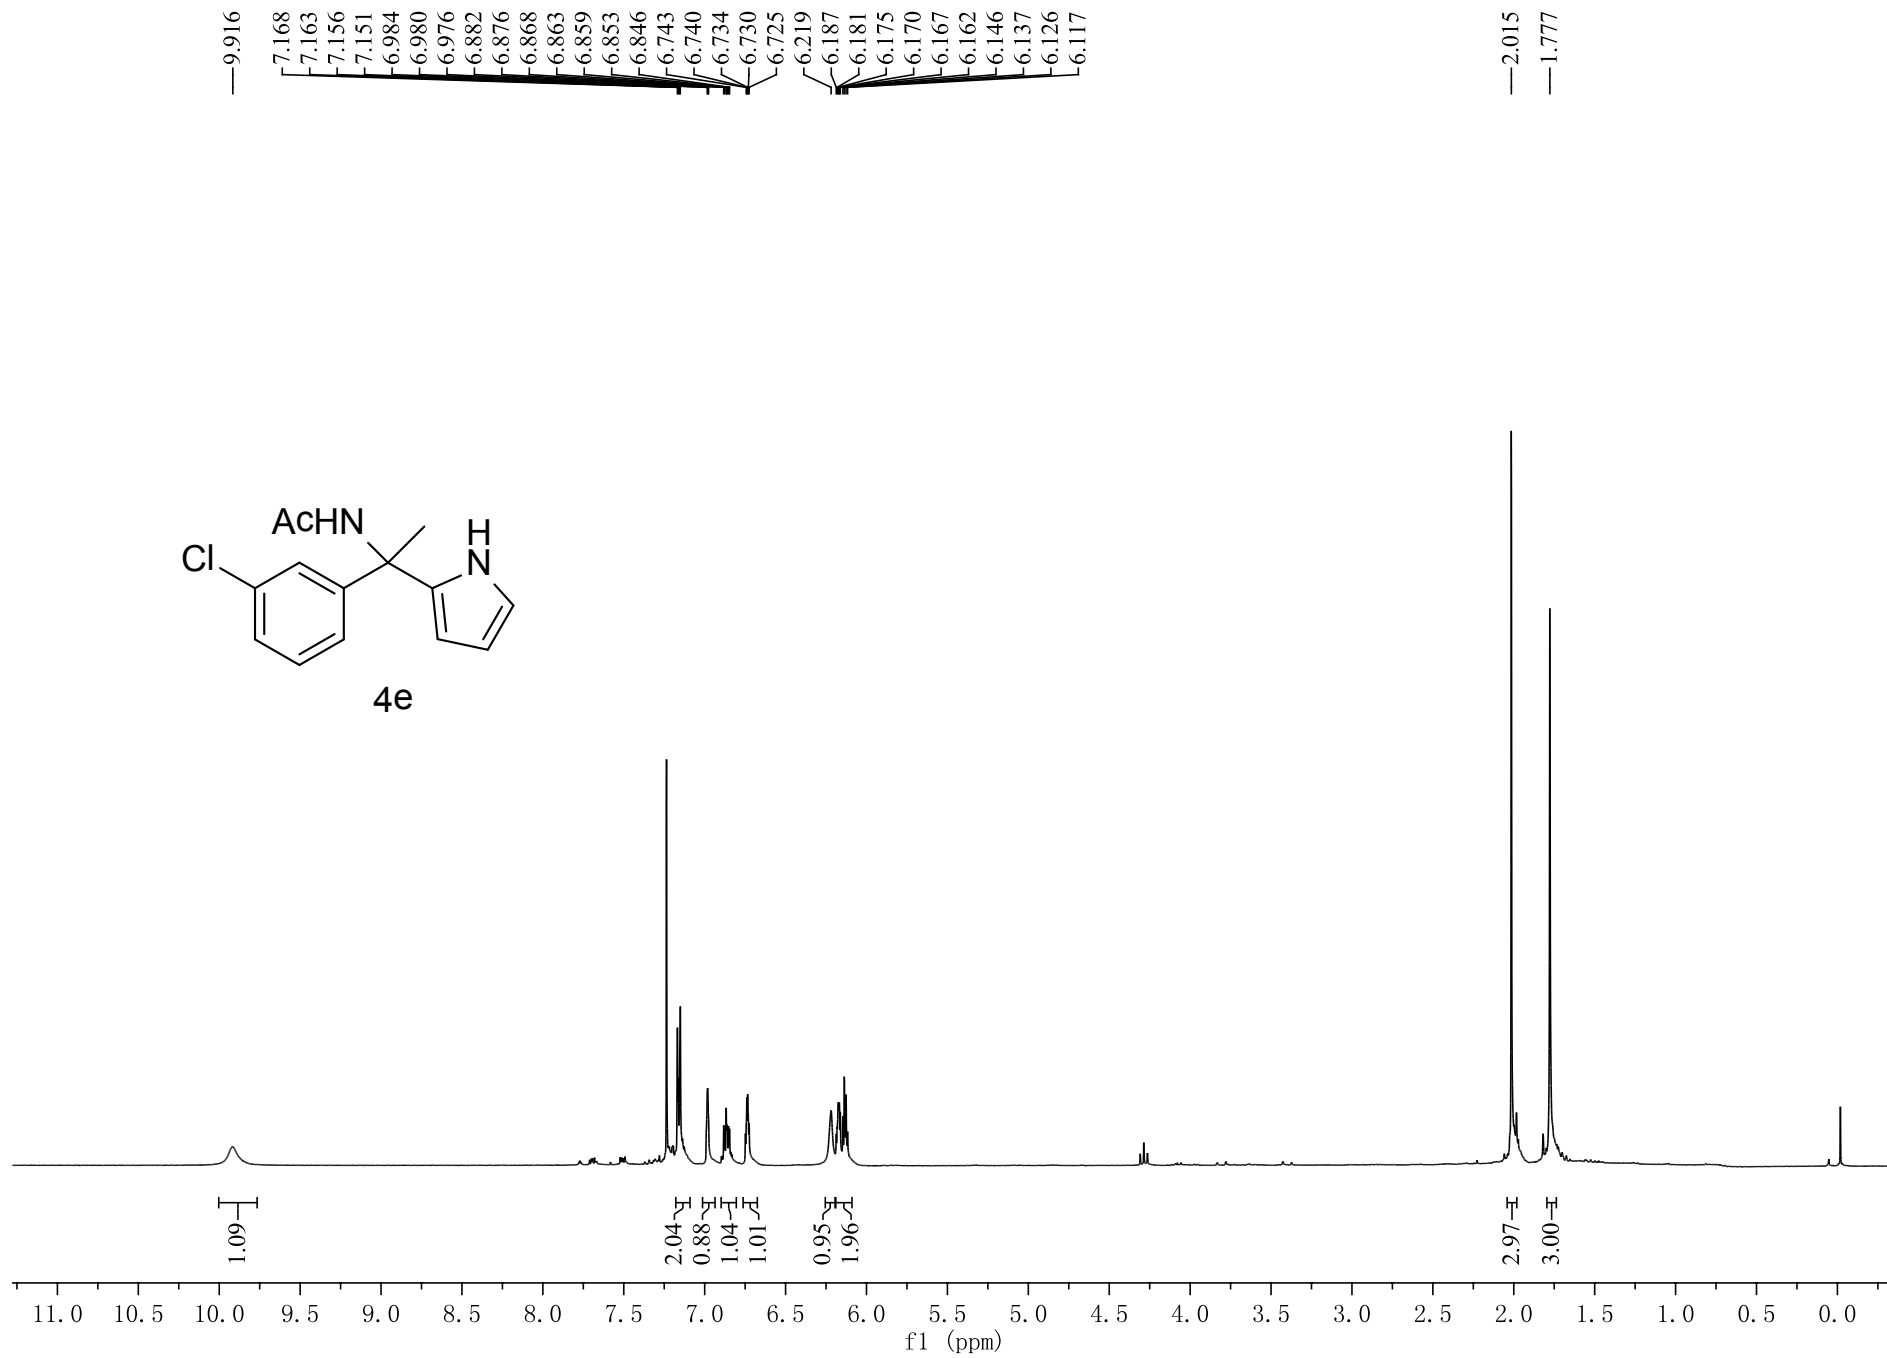

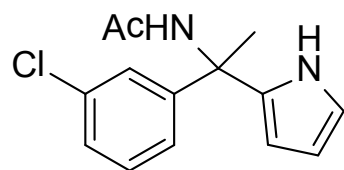

4e

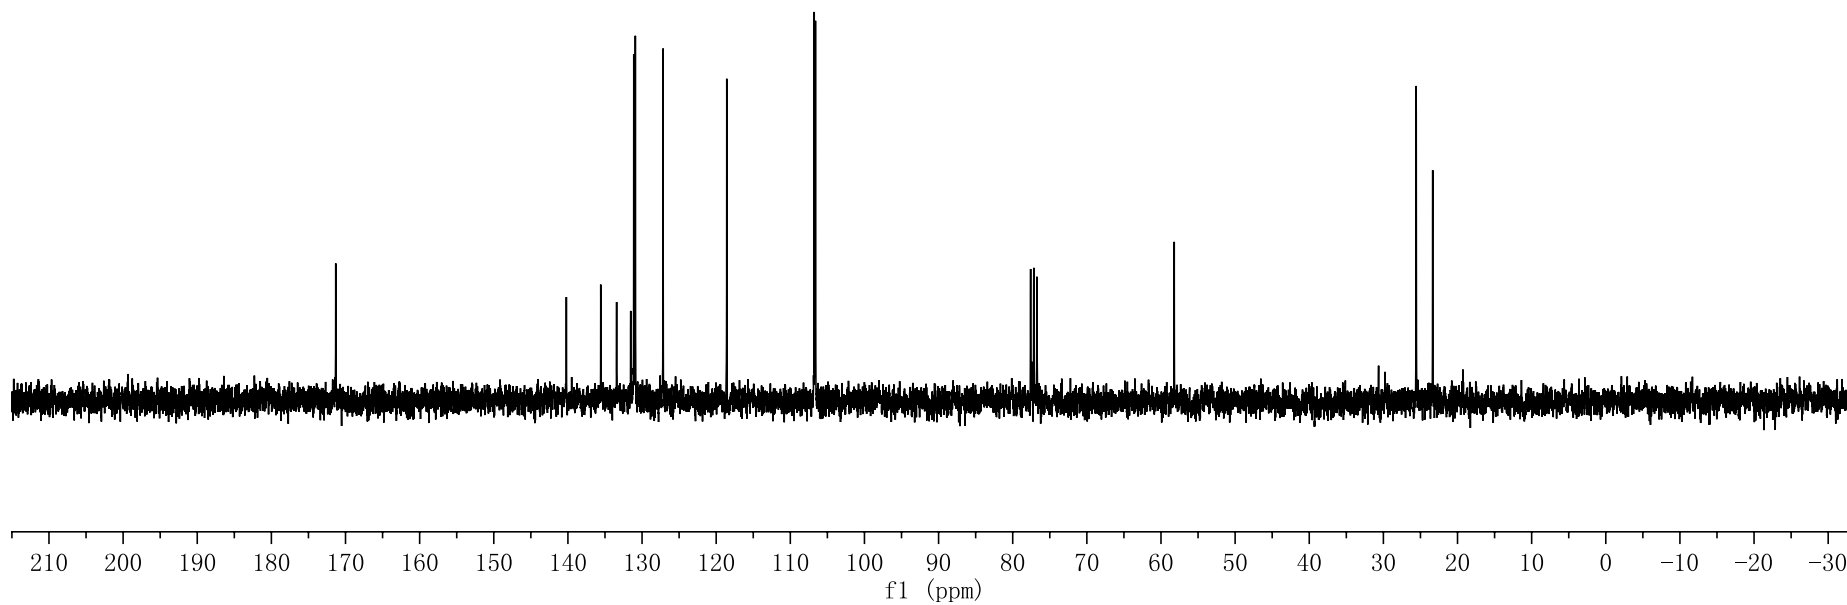

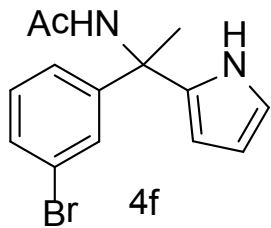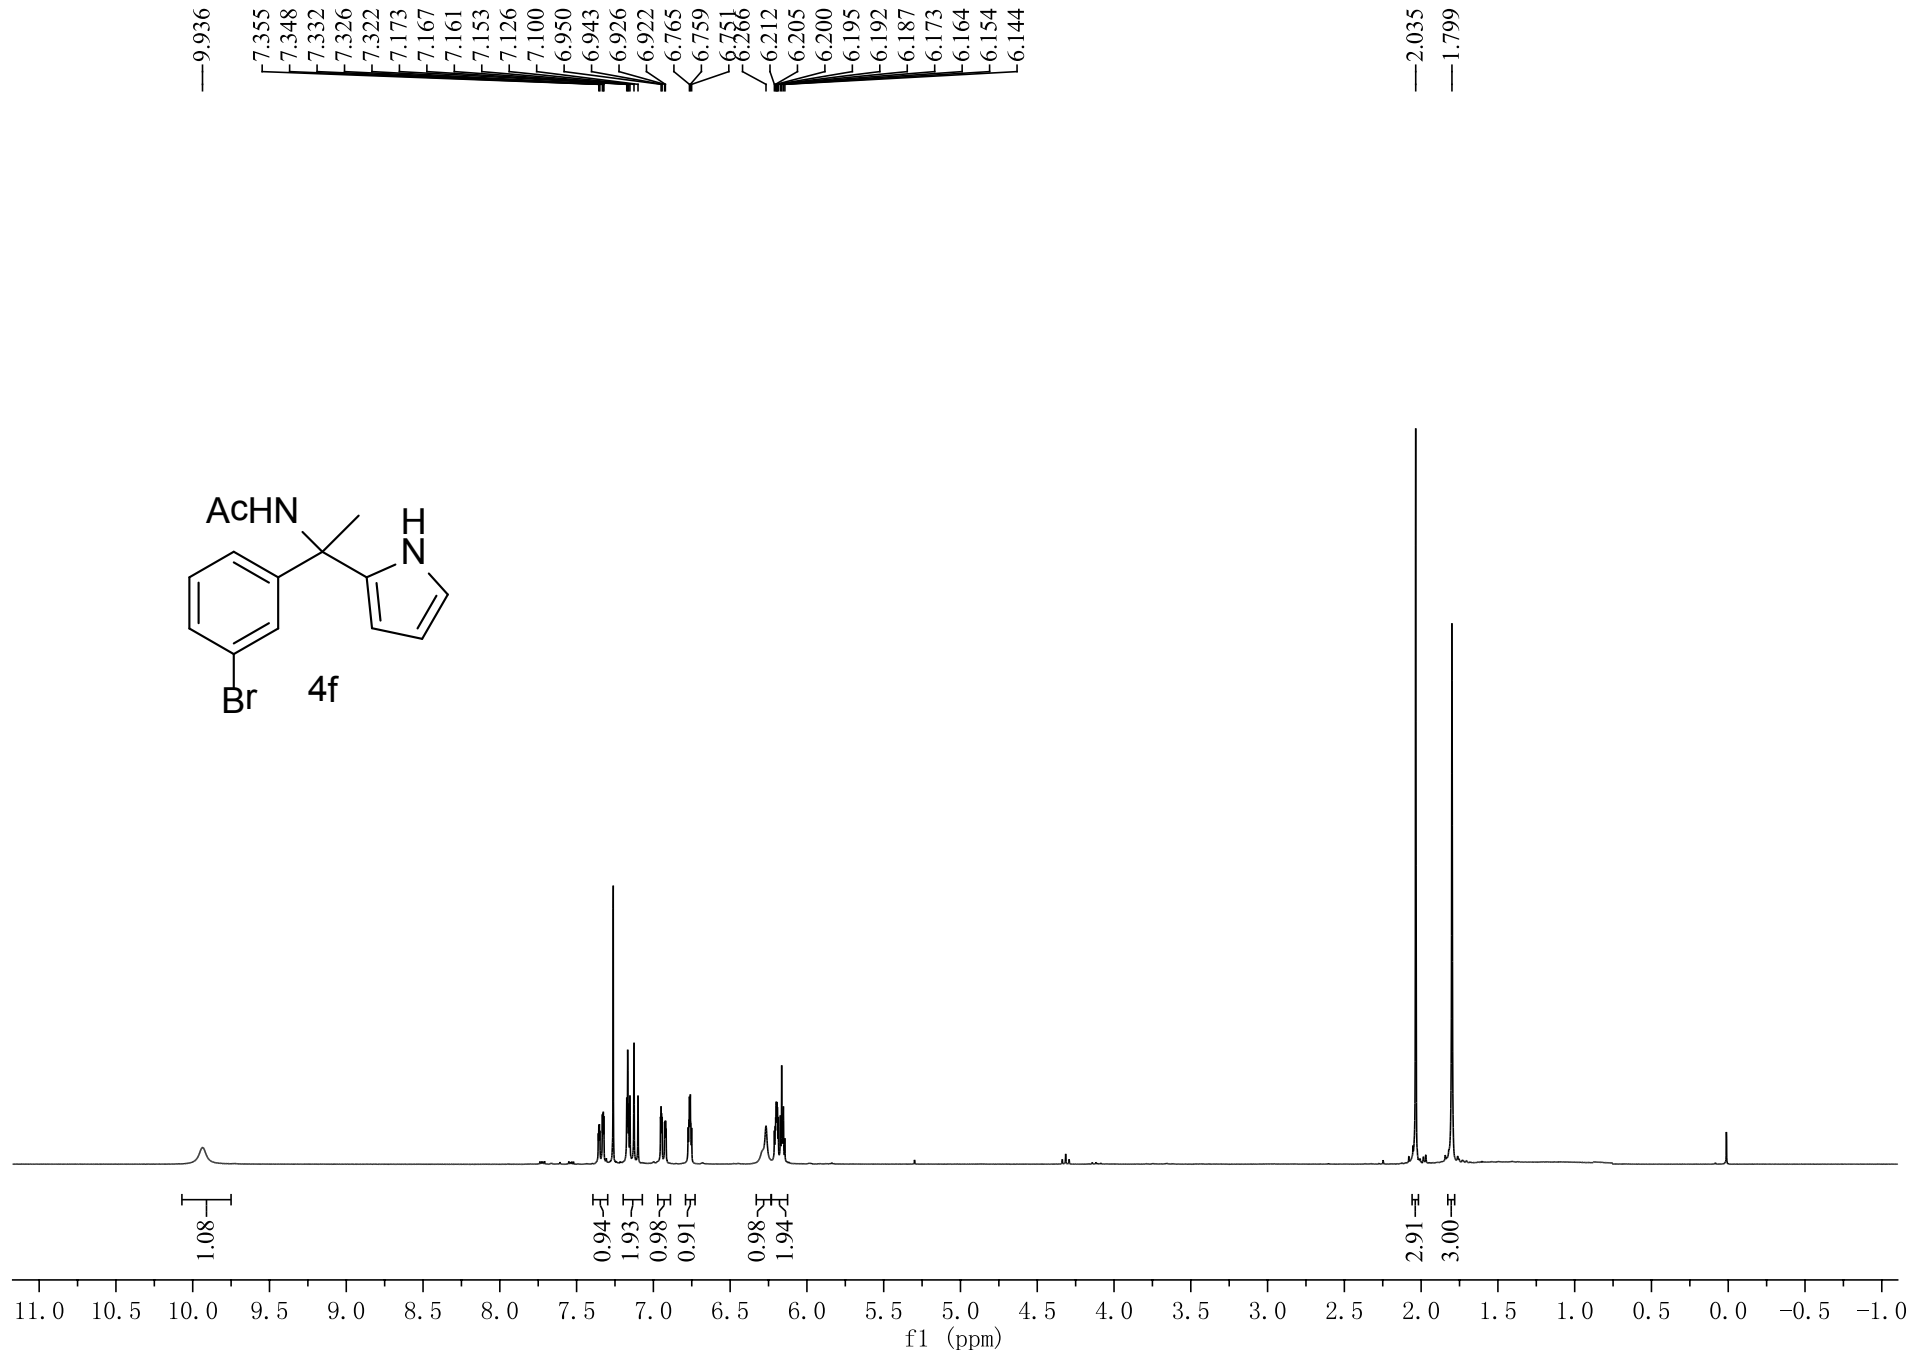



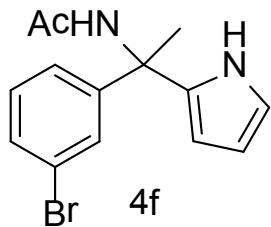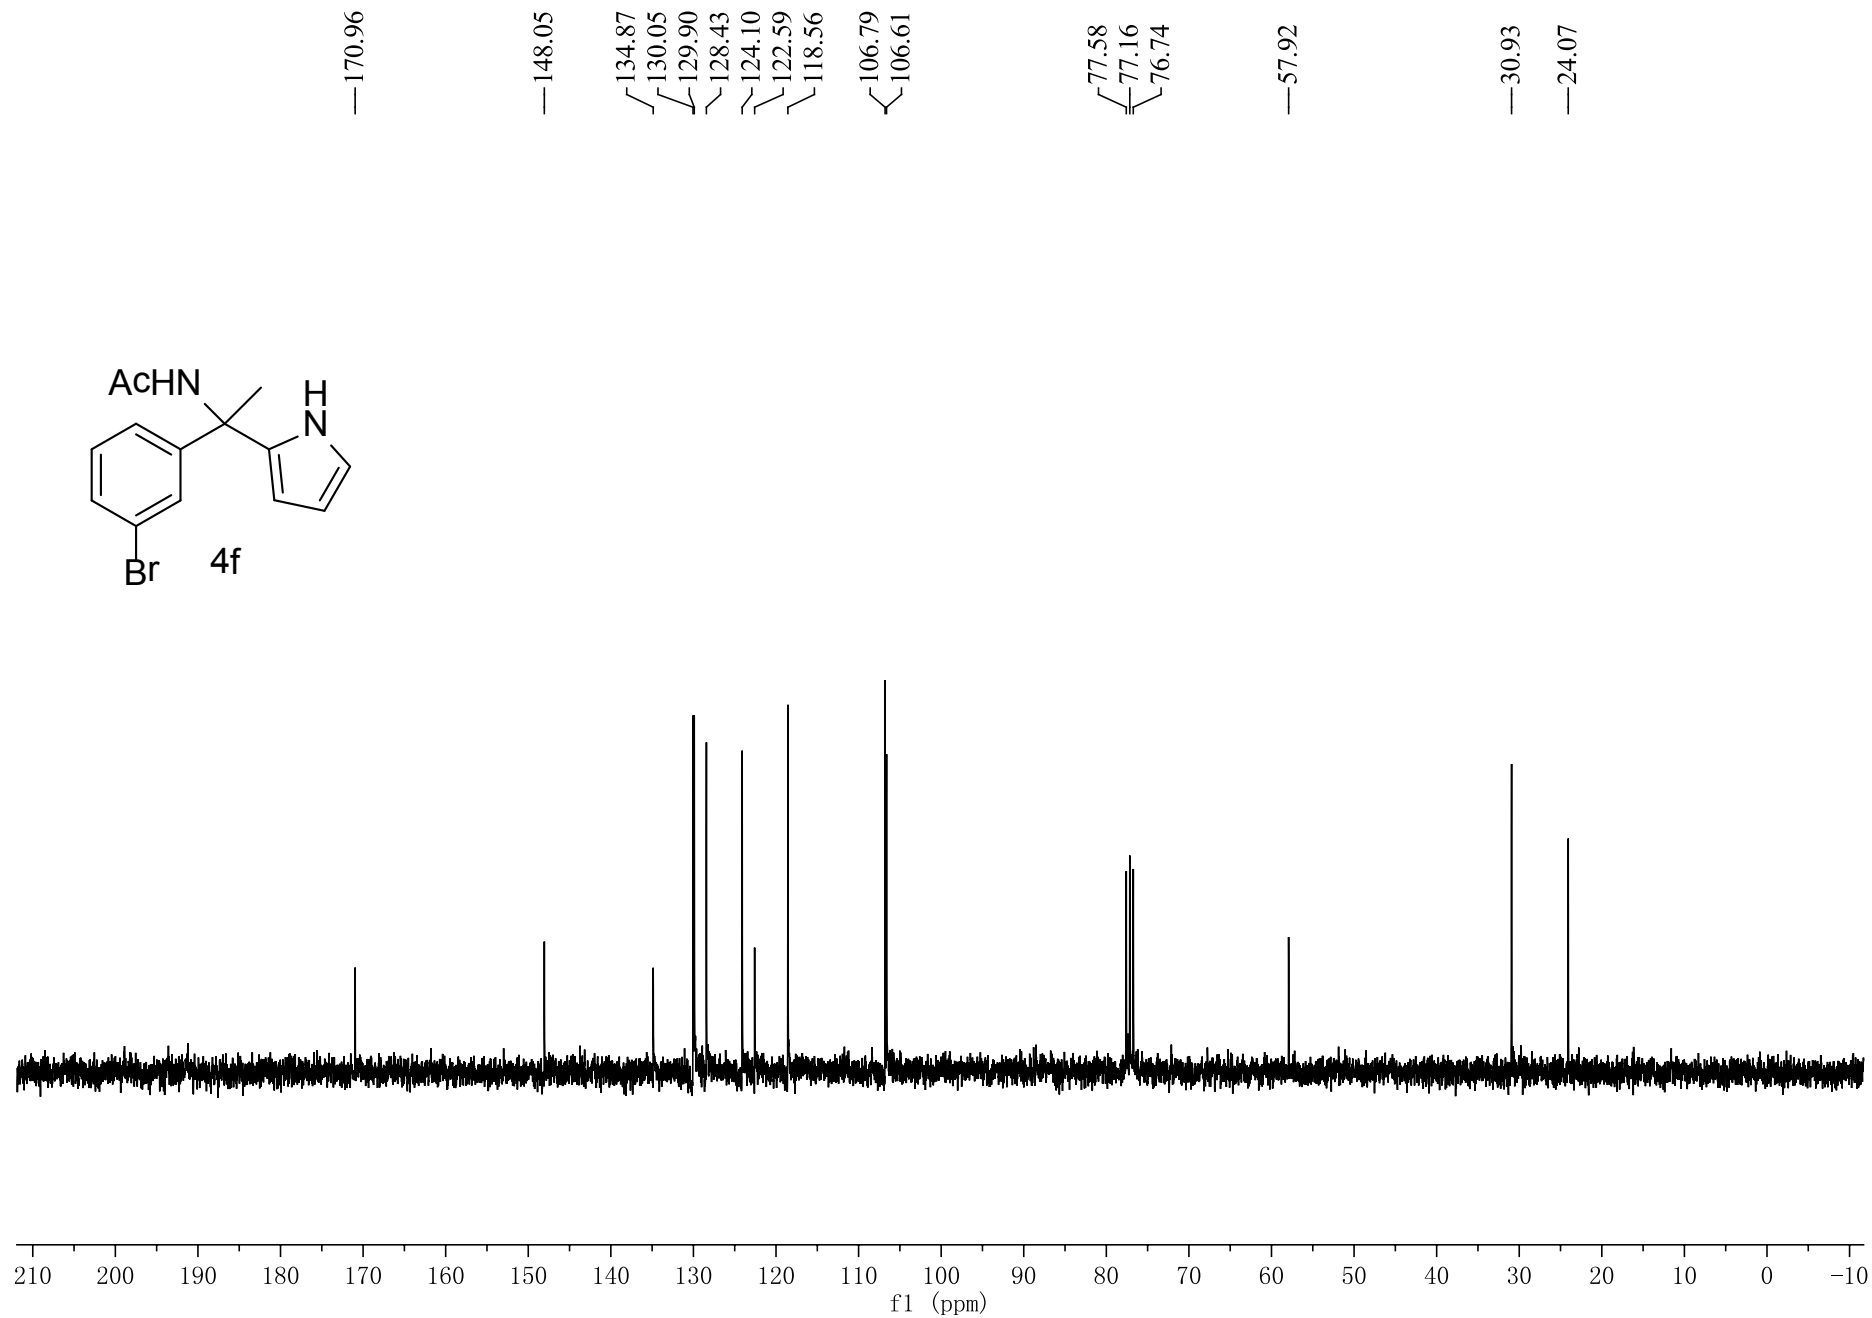

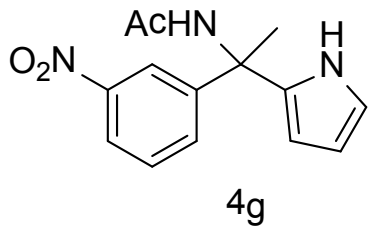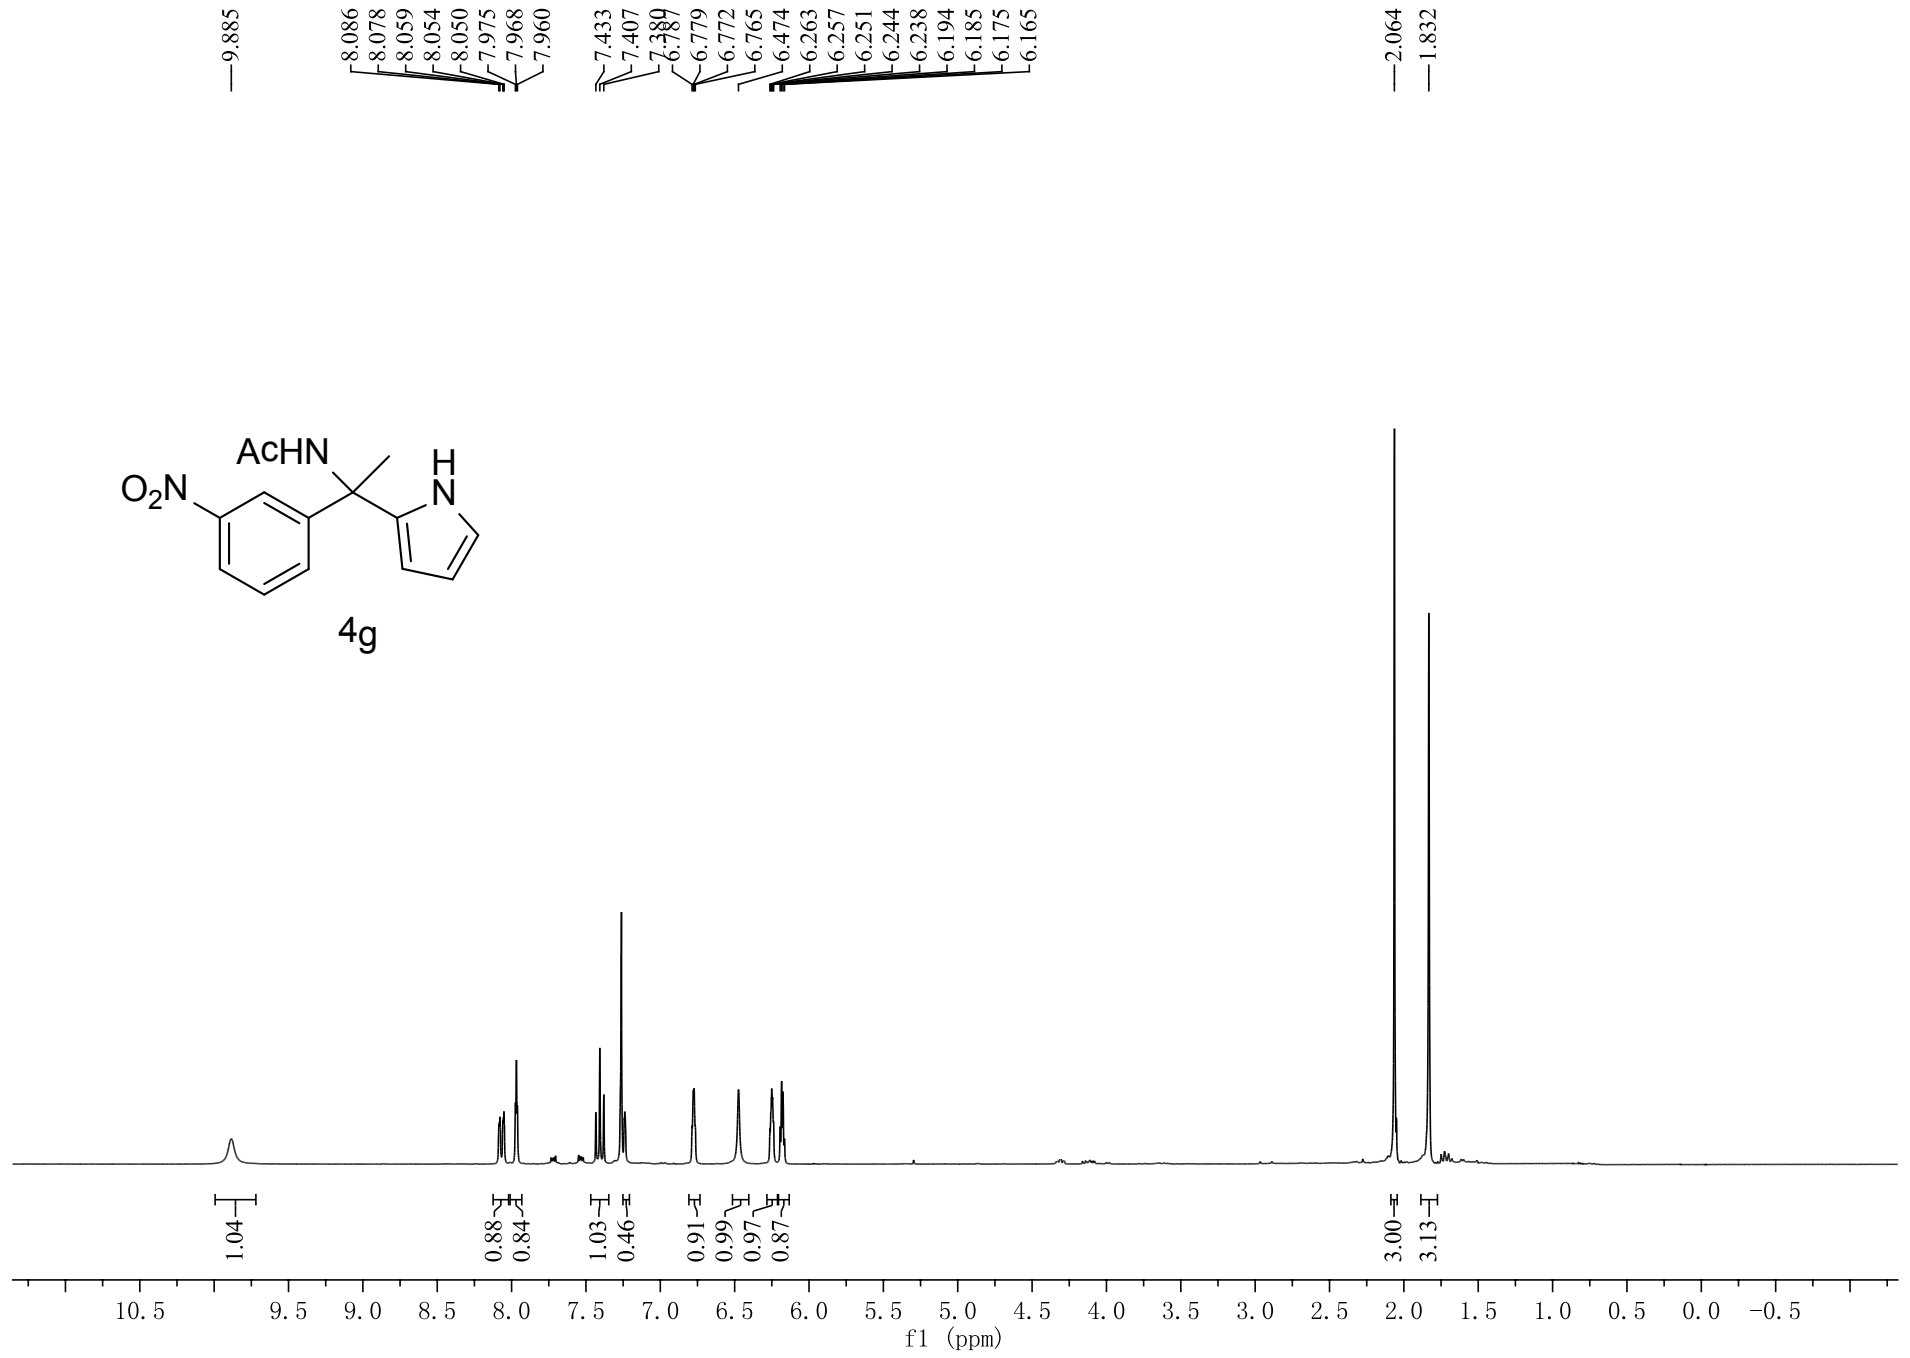

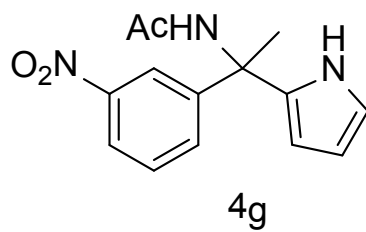

—171.31

—148.18

134.27

131.76

129.31

122.02

120.23

118.90

107.20

106.86

77.58

77.16

76.73

—57.89

—30.72

—23.94

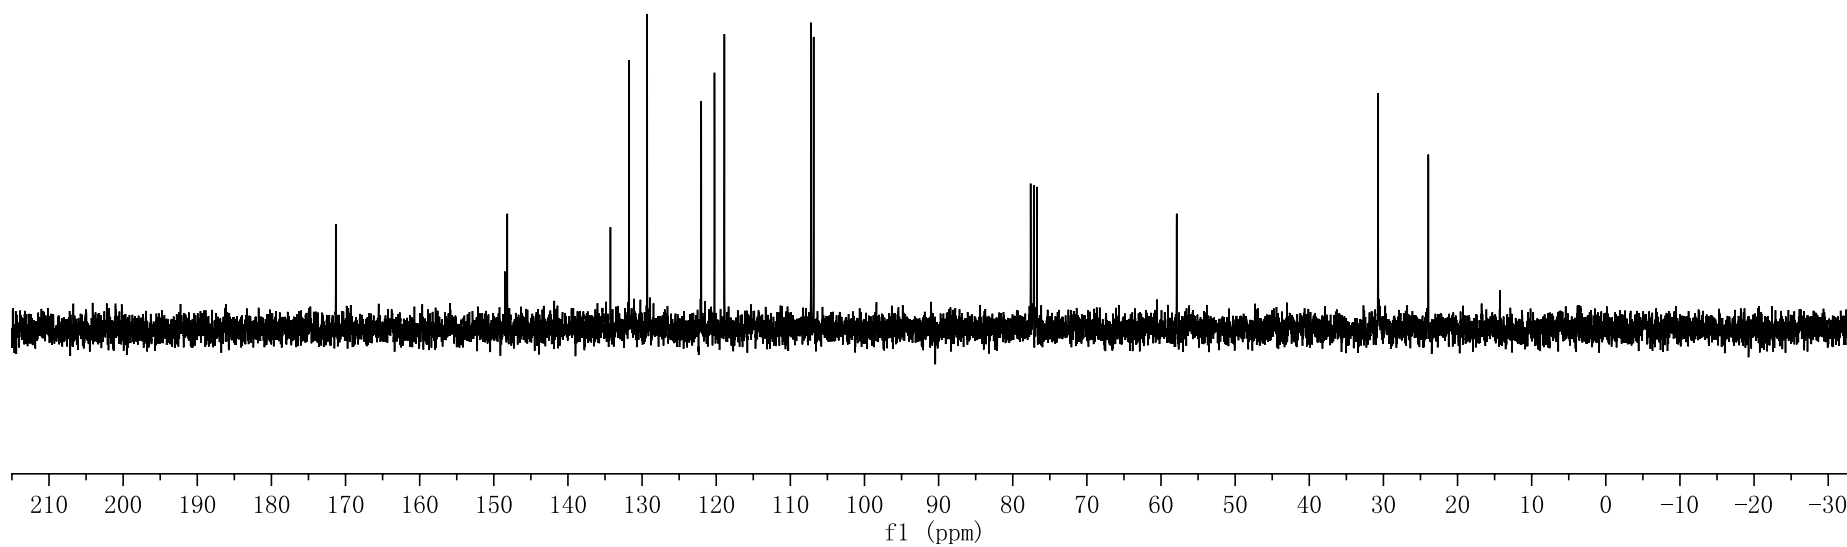

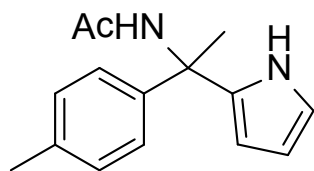

4h

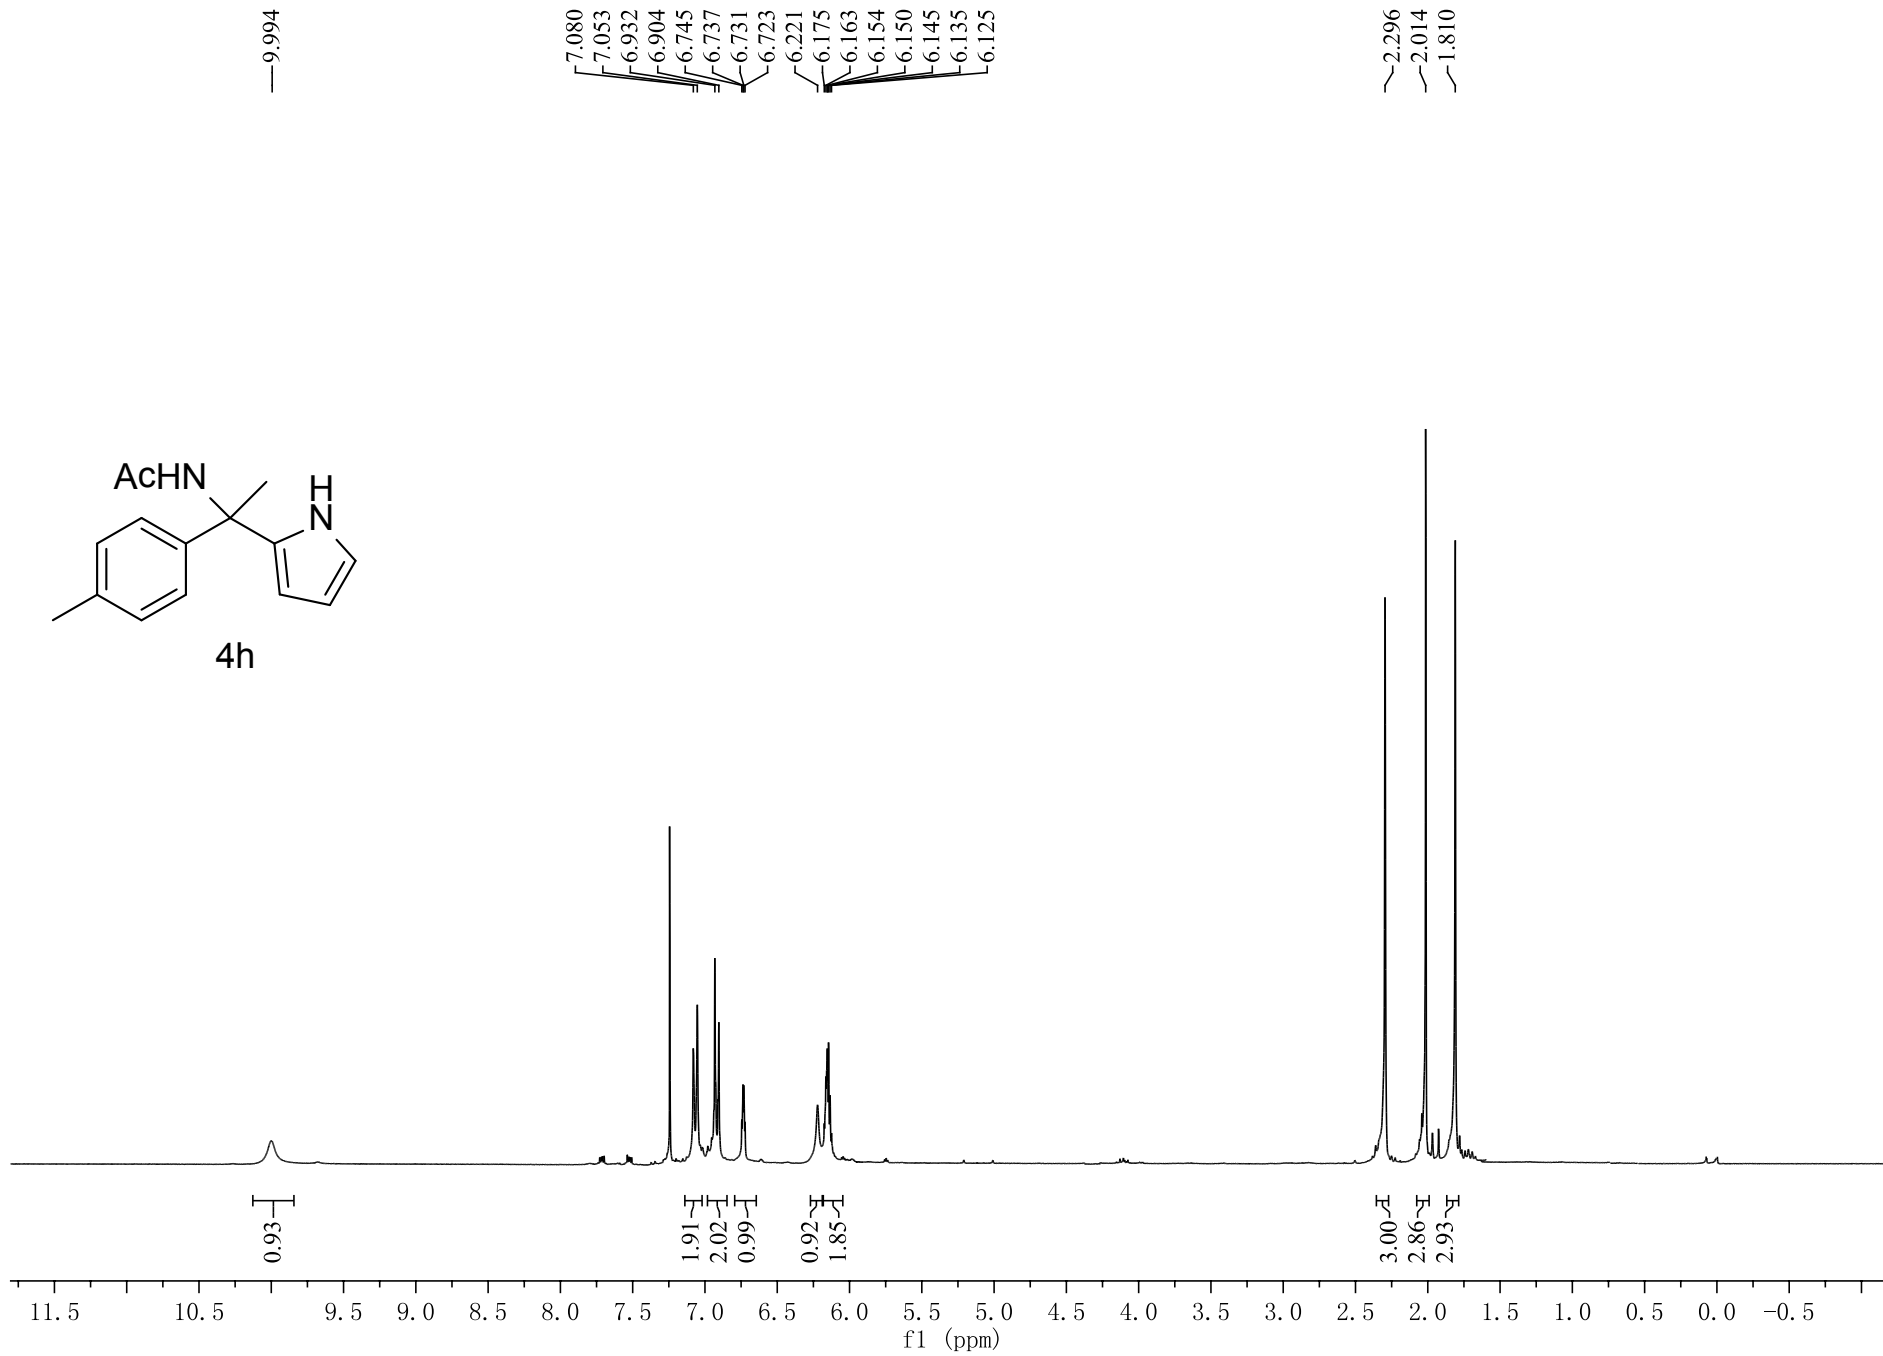

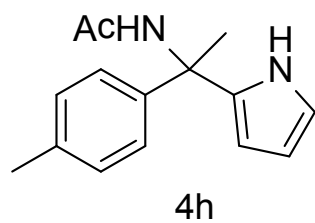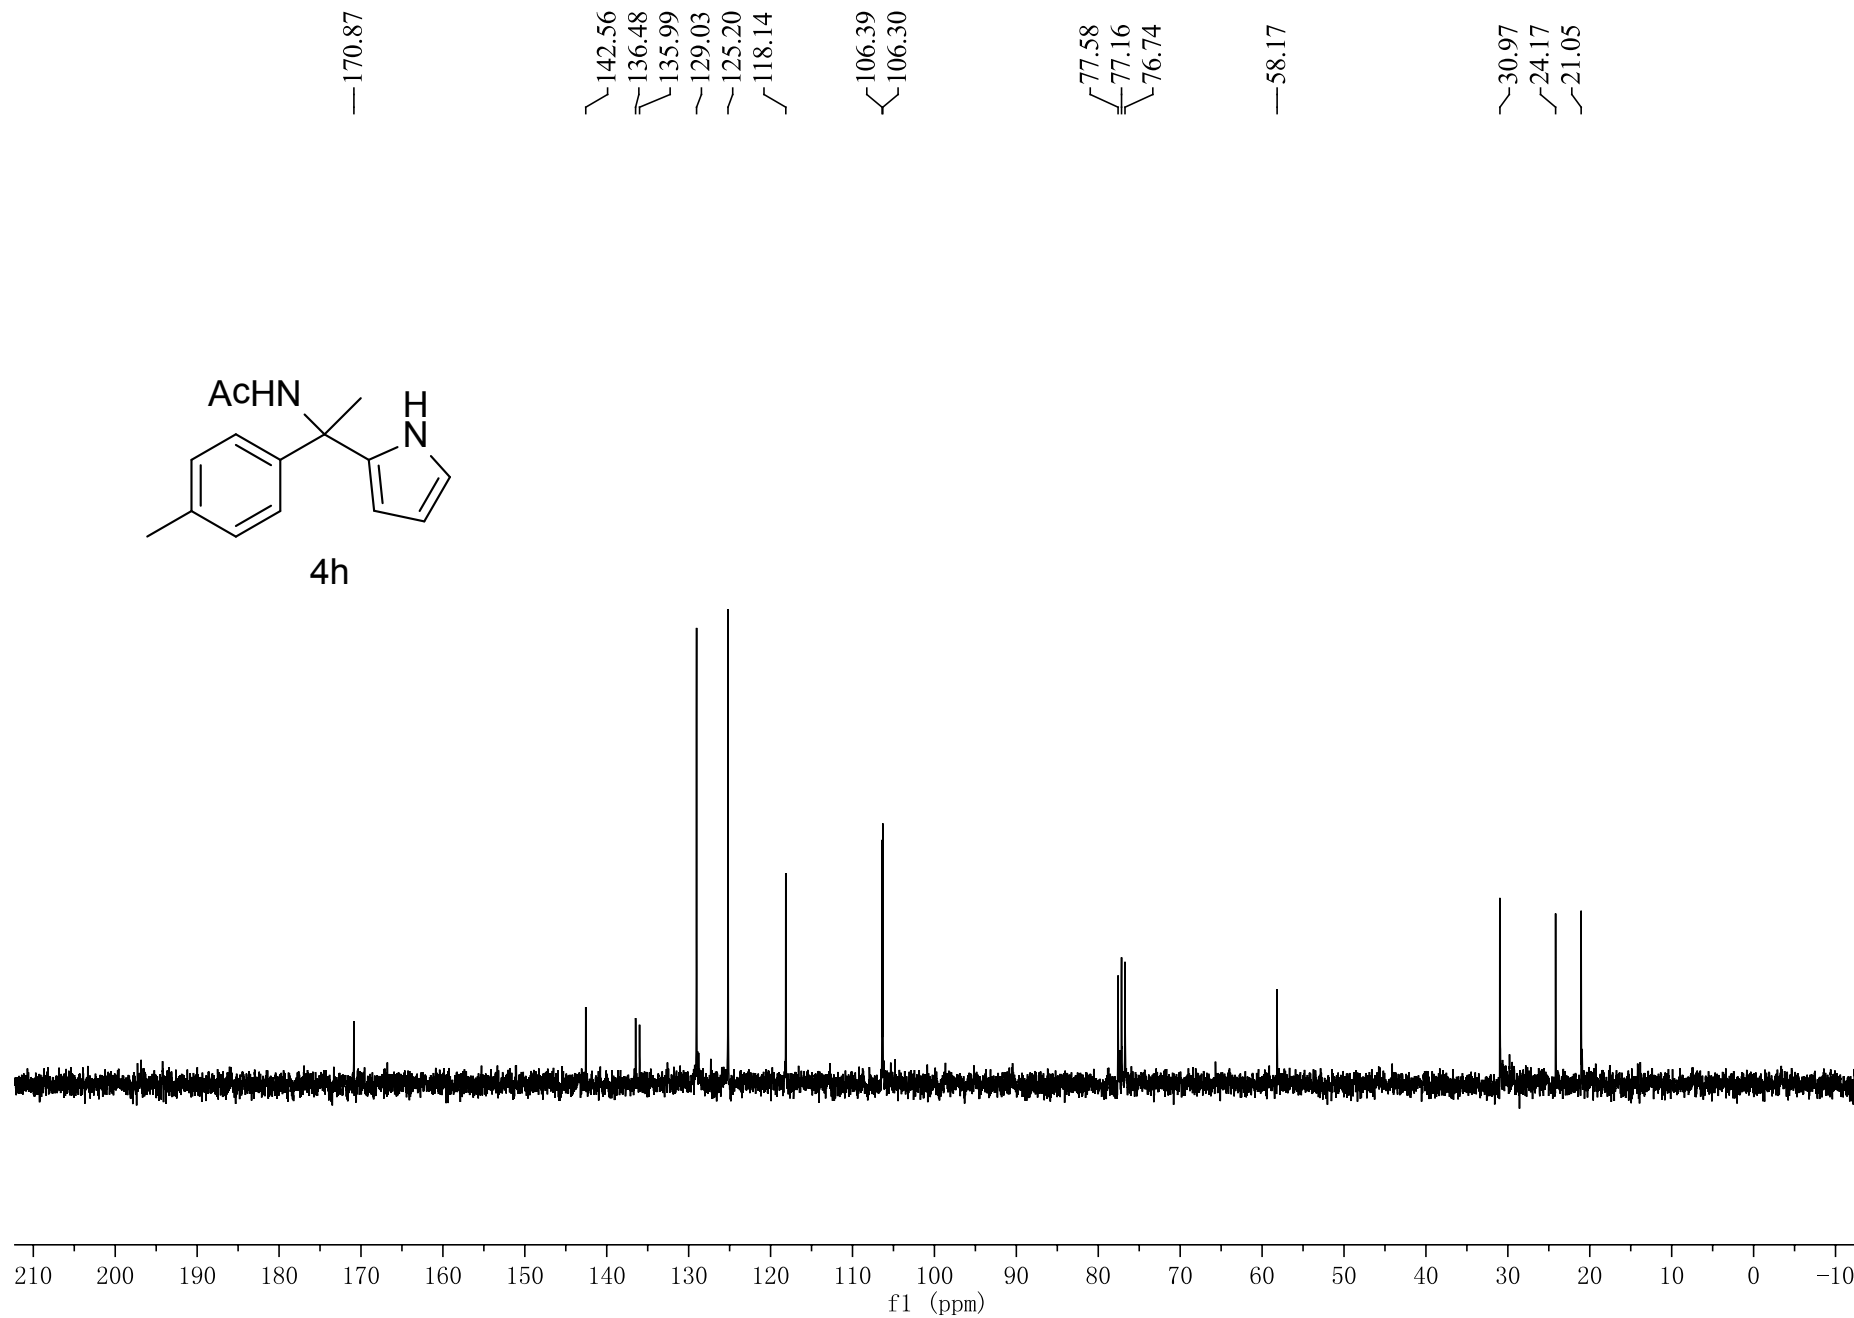

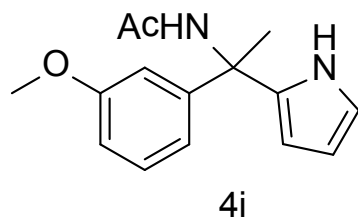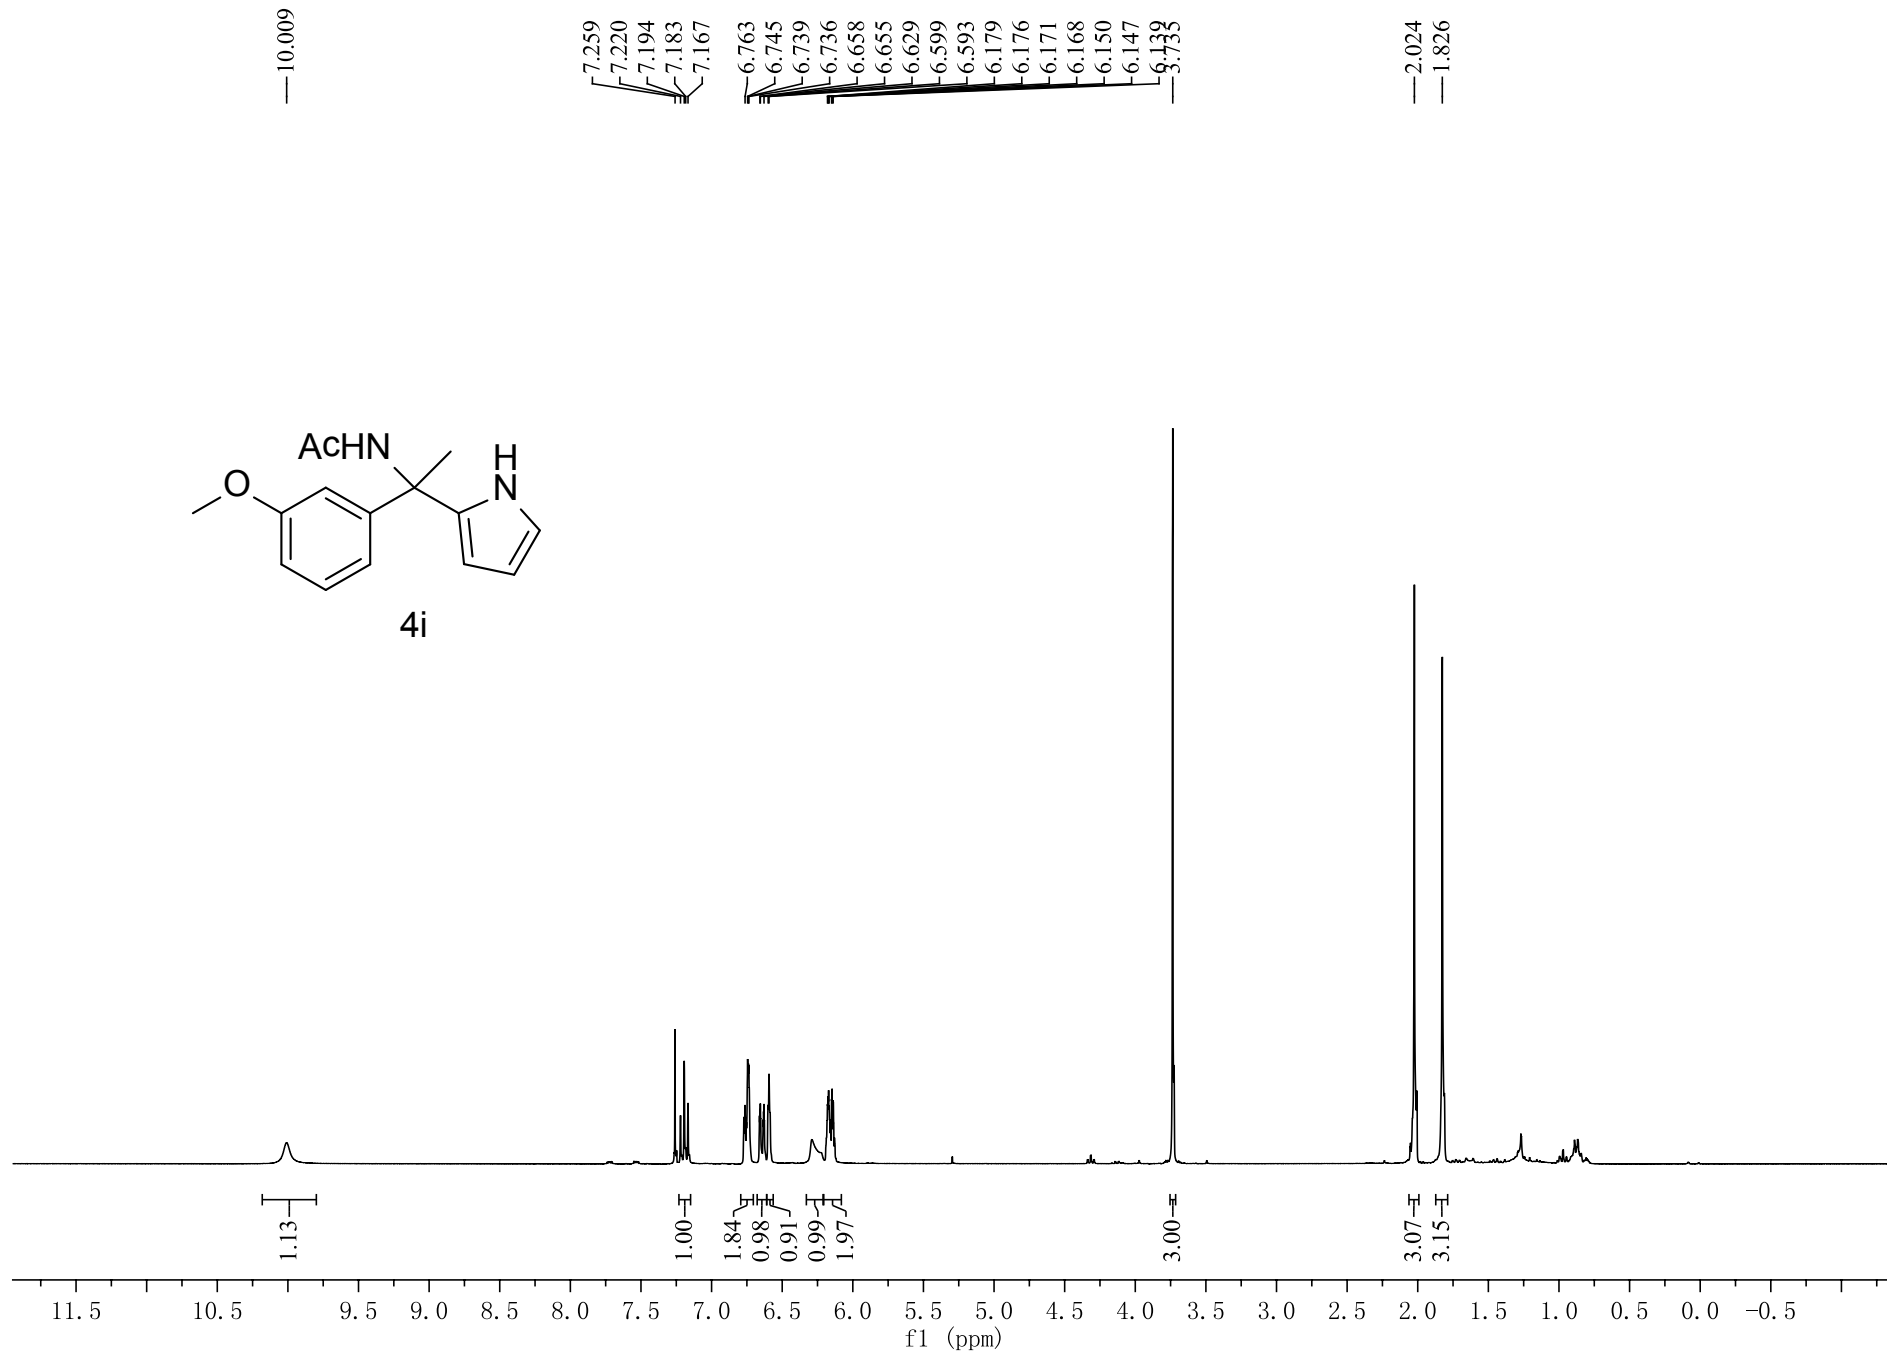

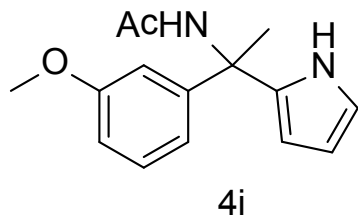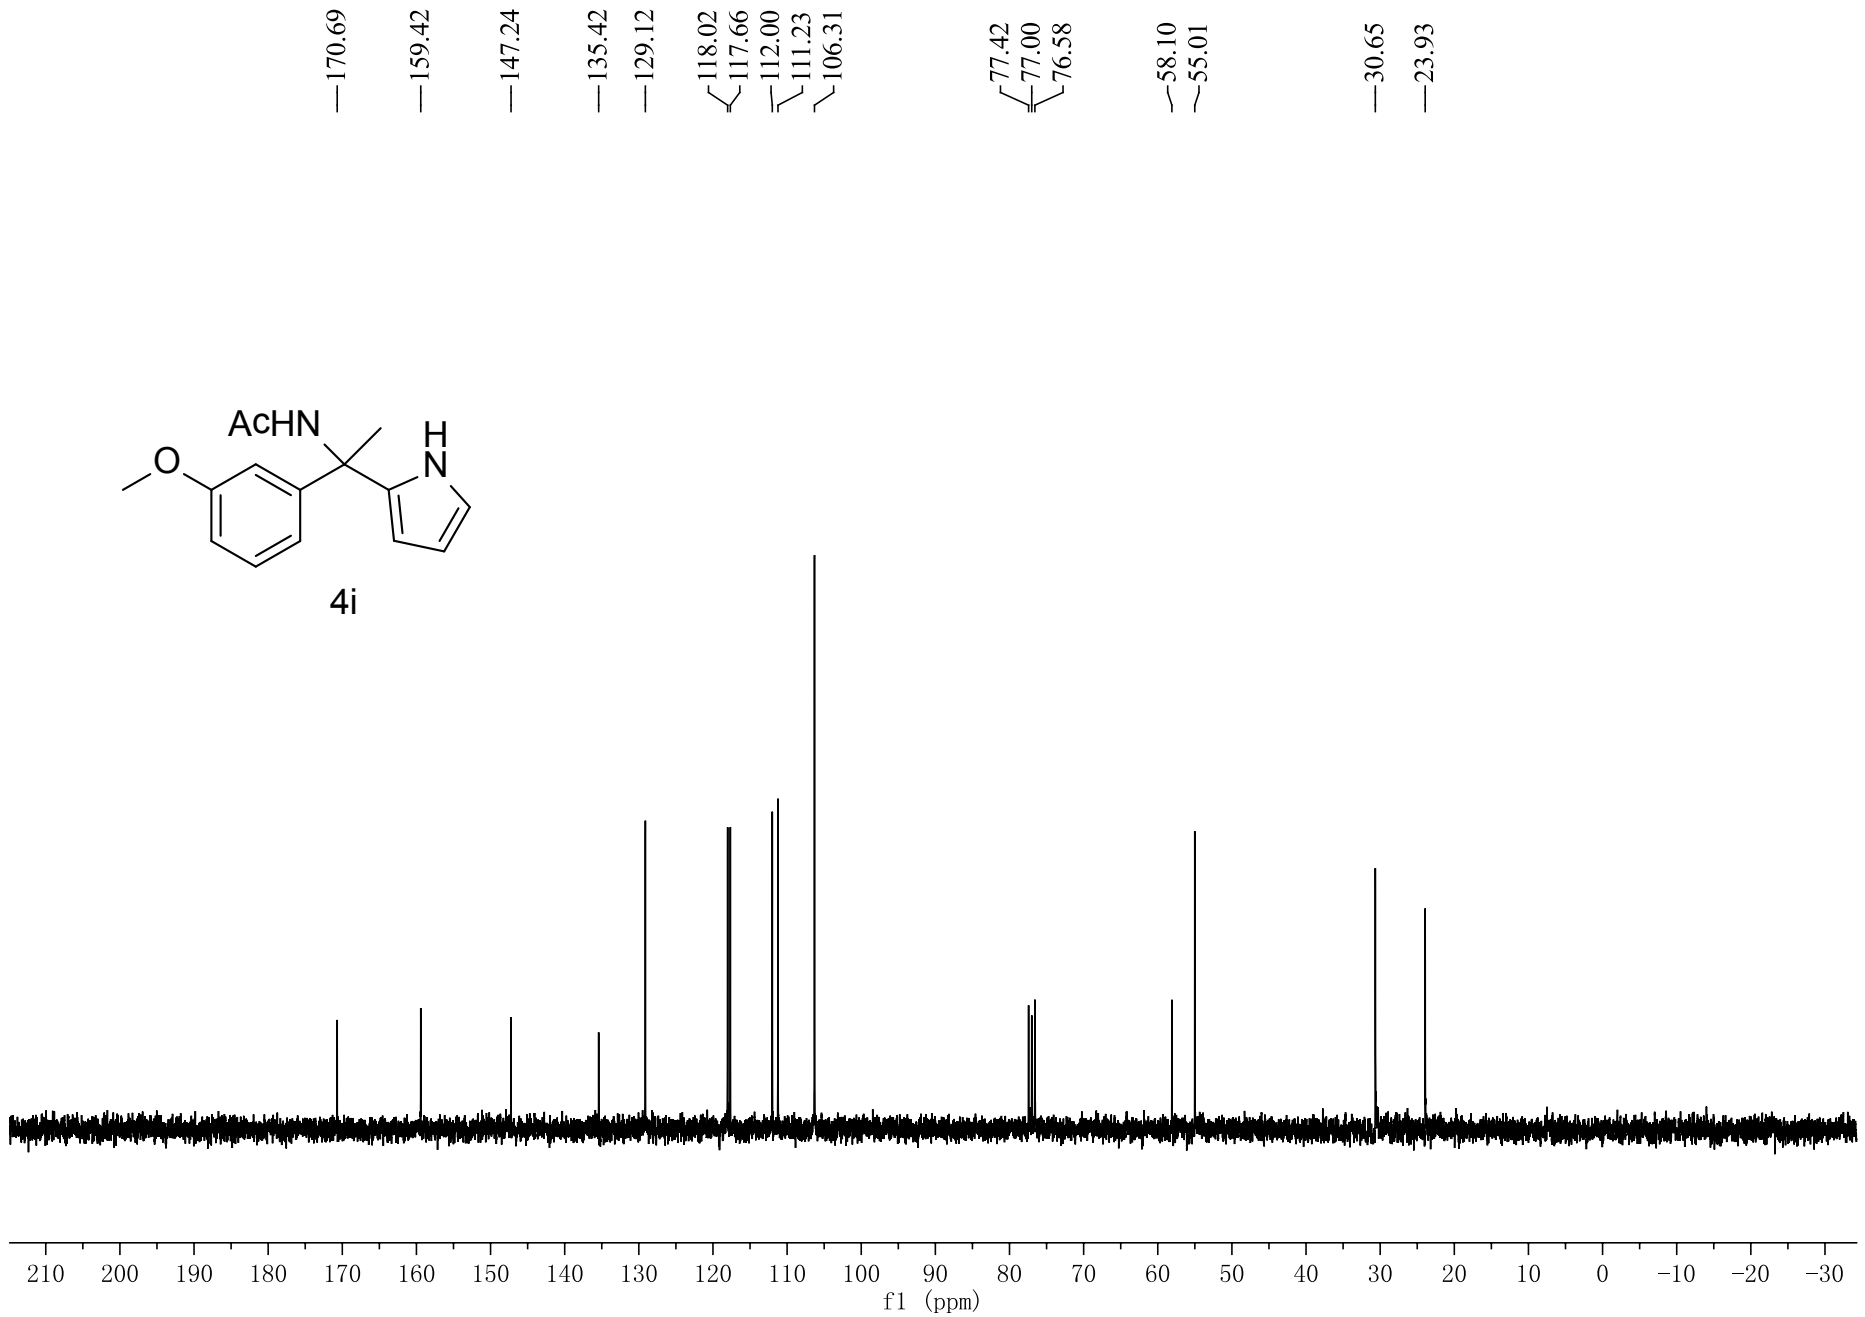

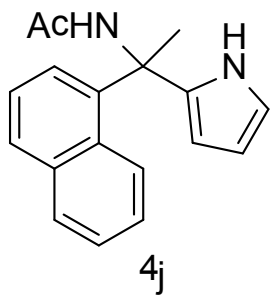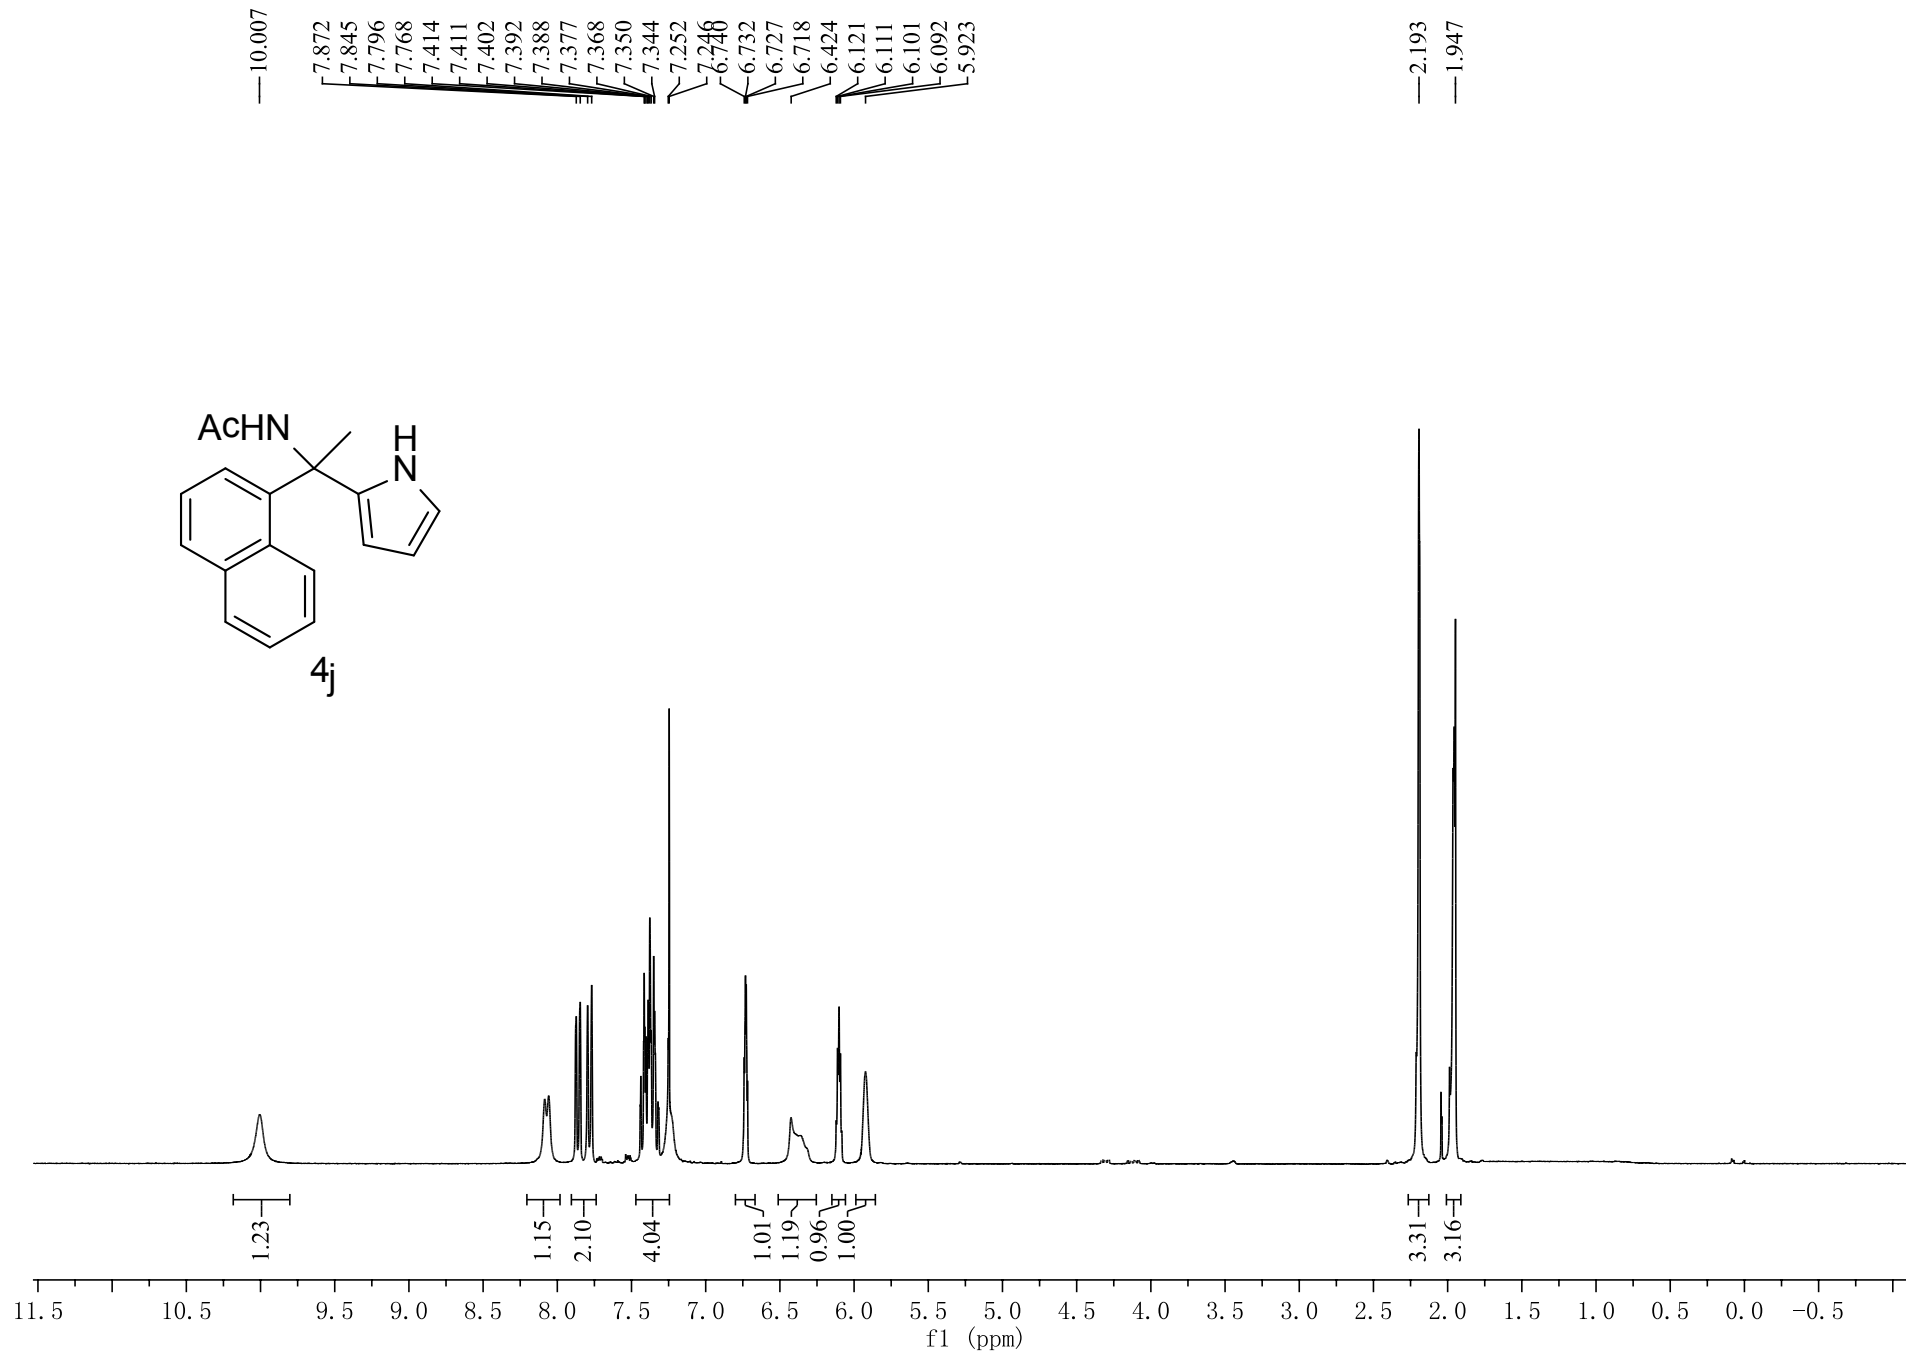



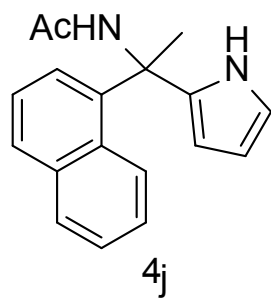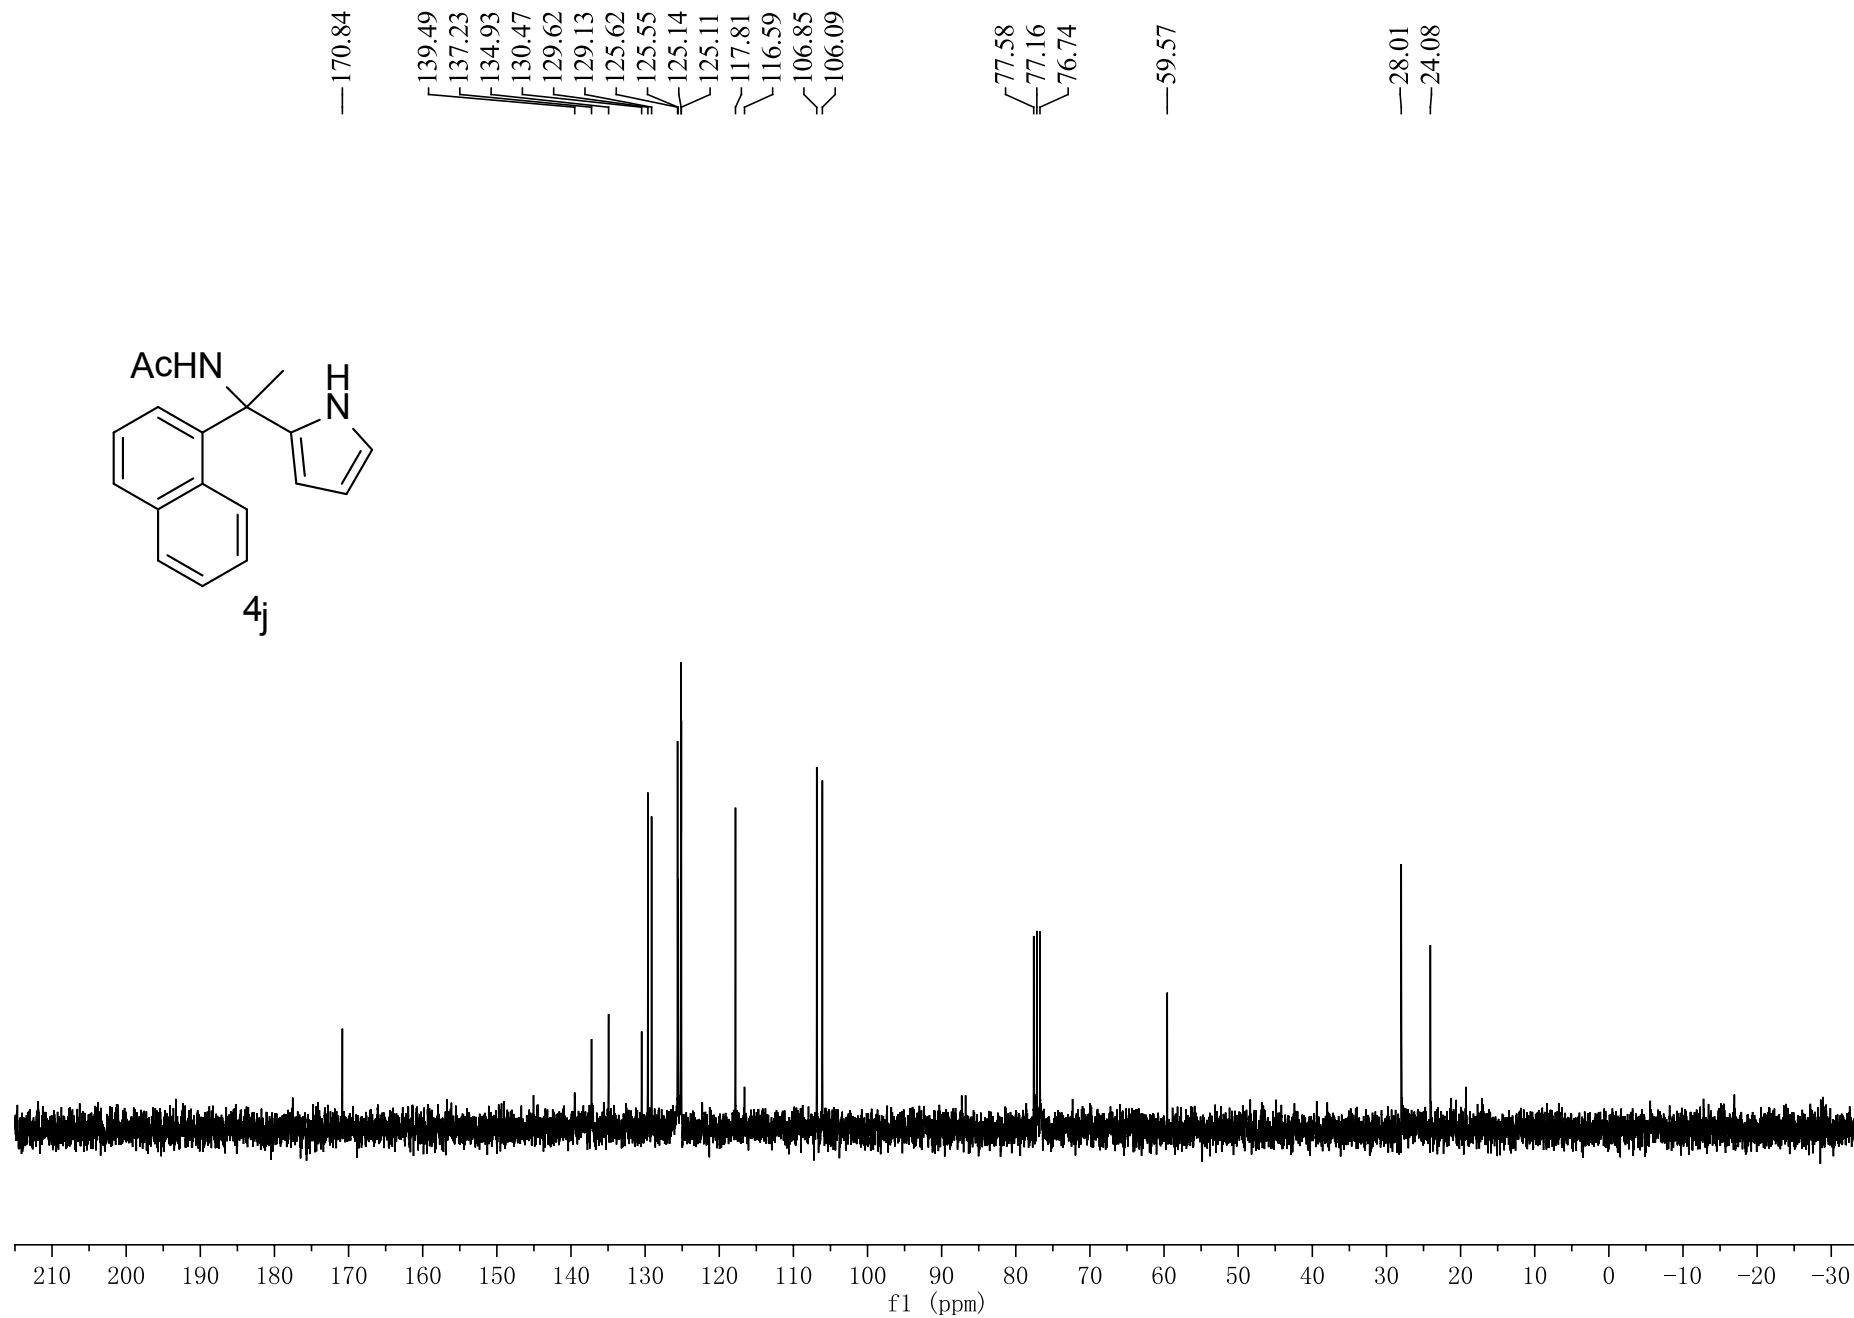

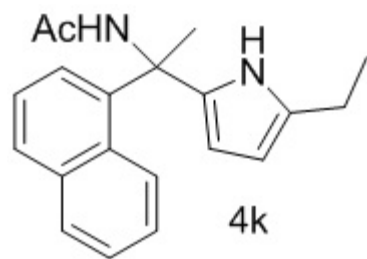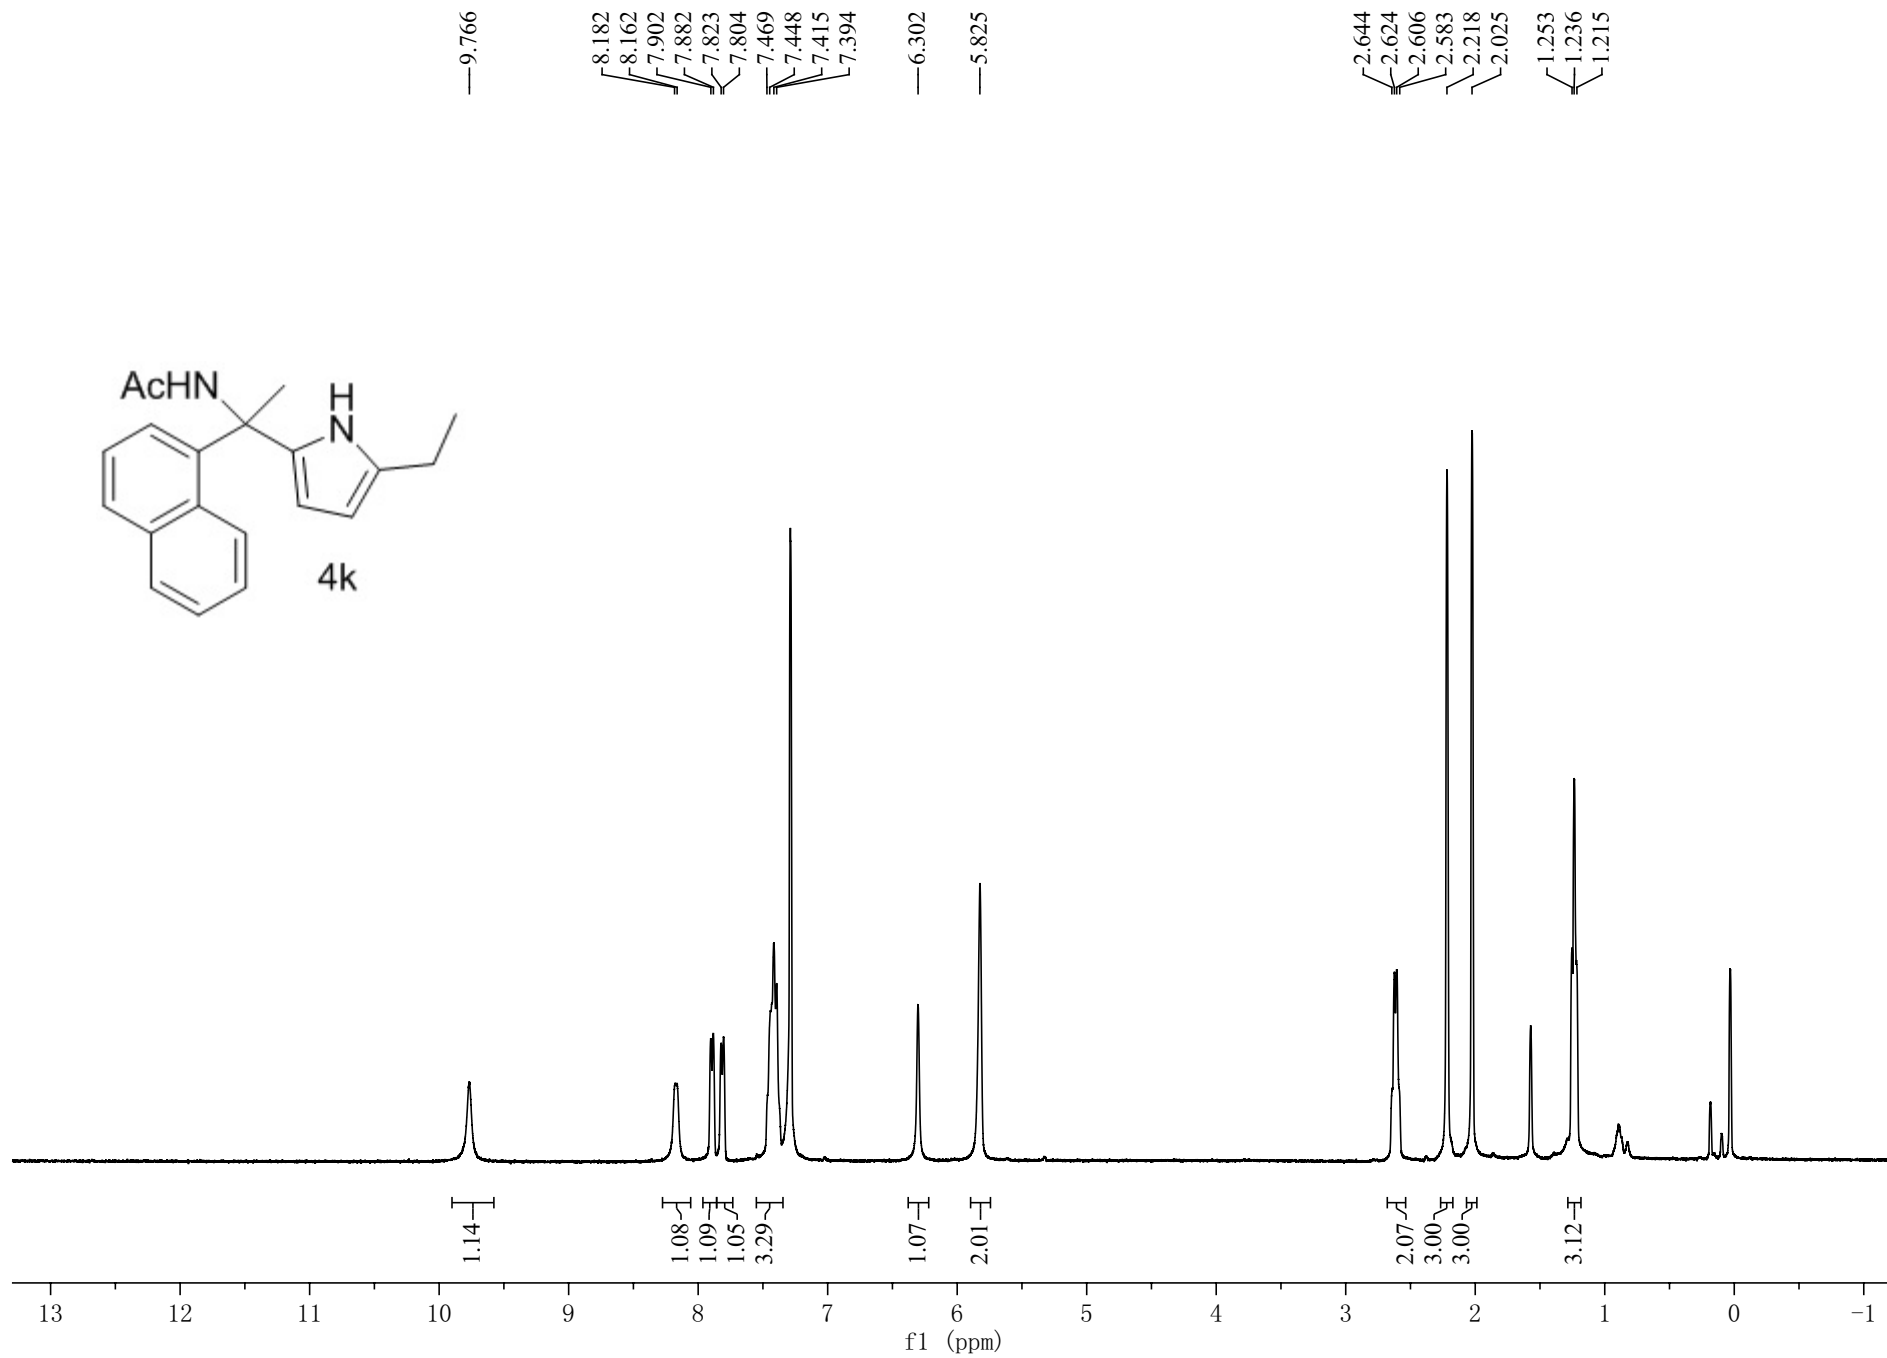

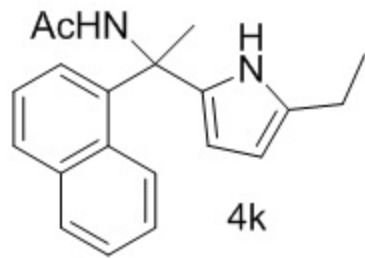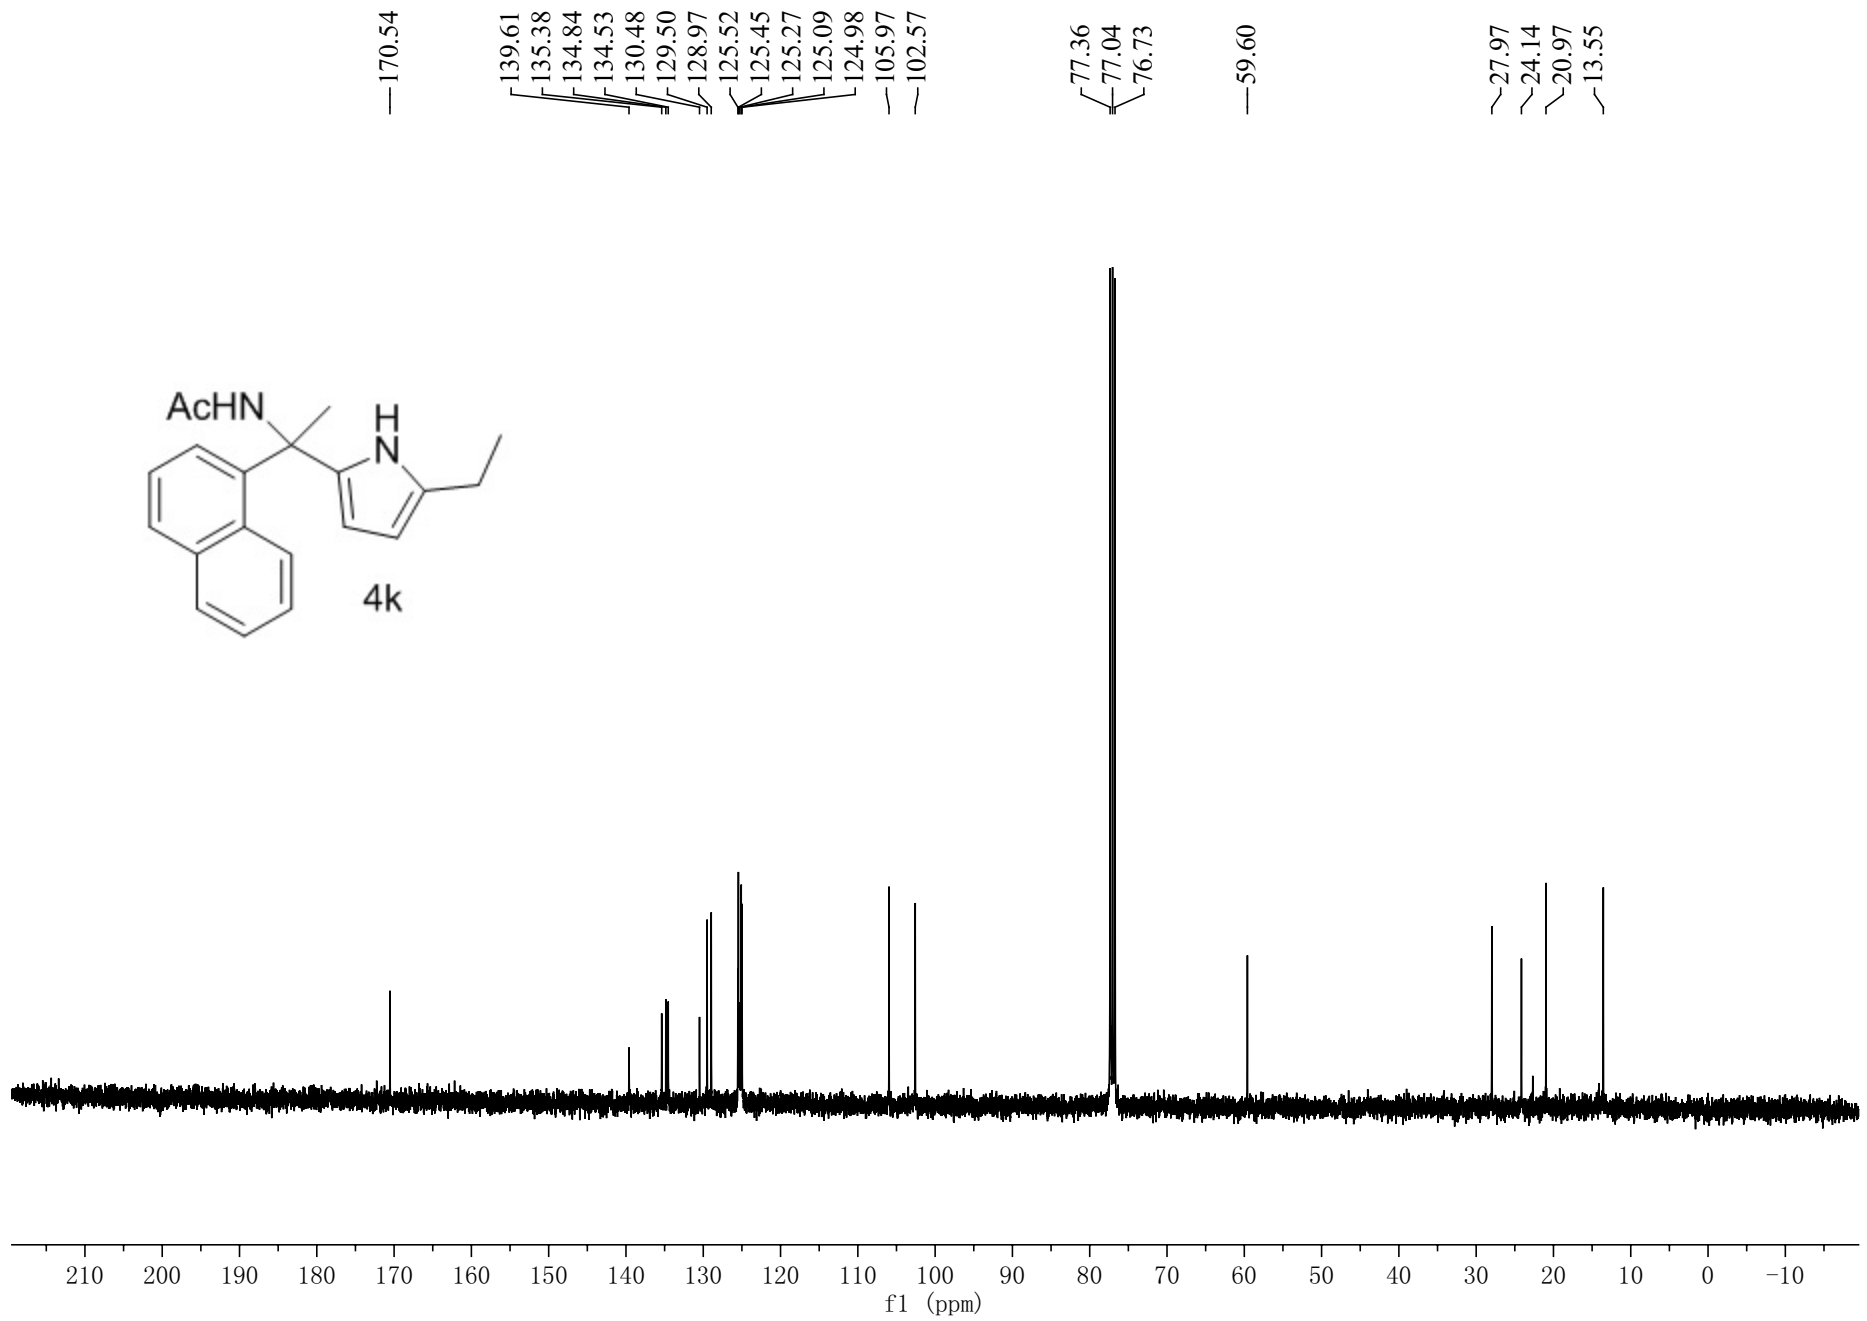

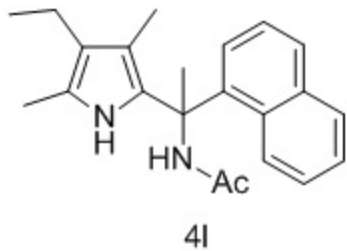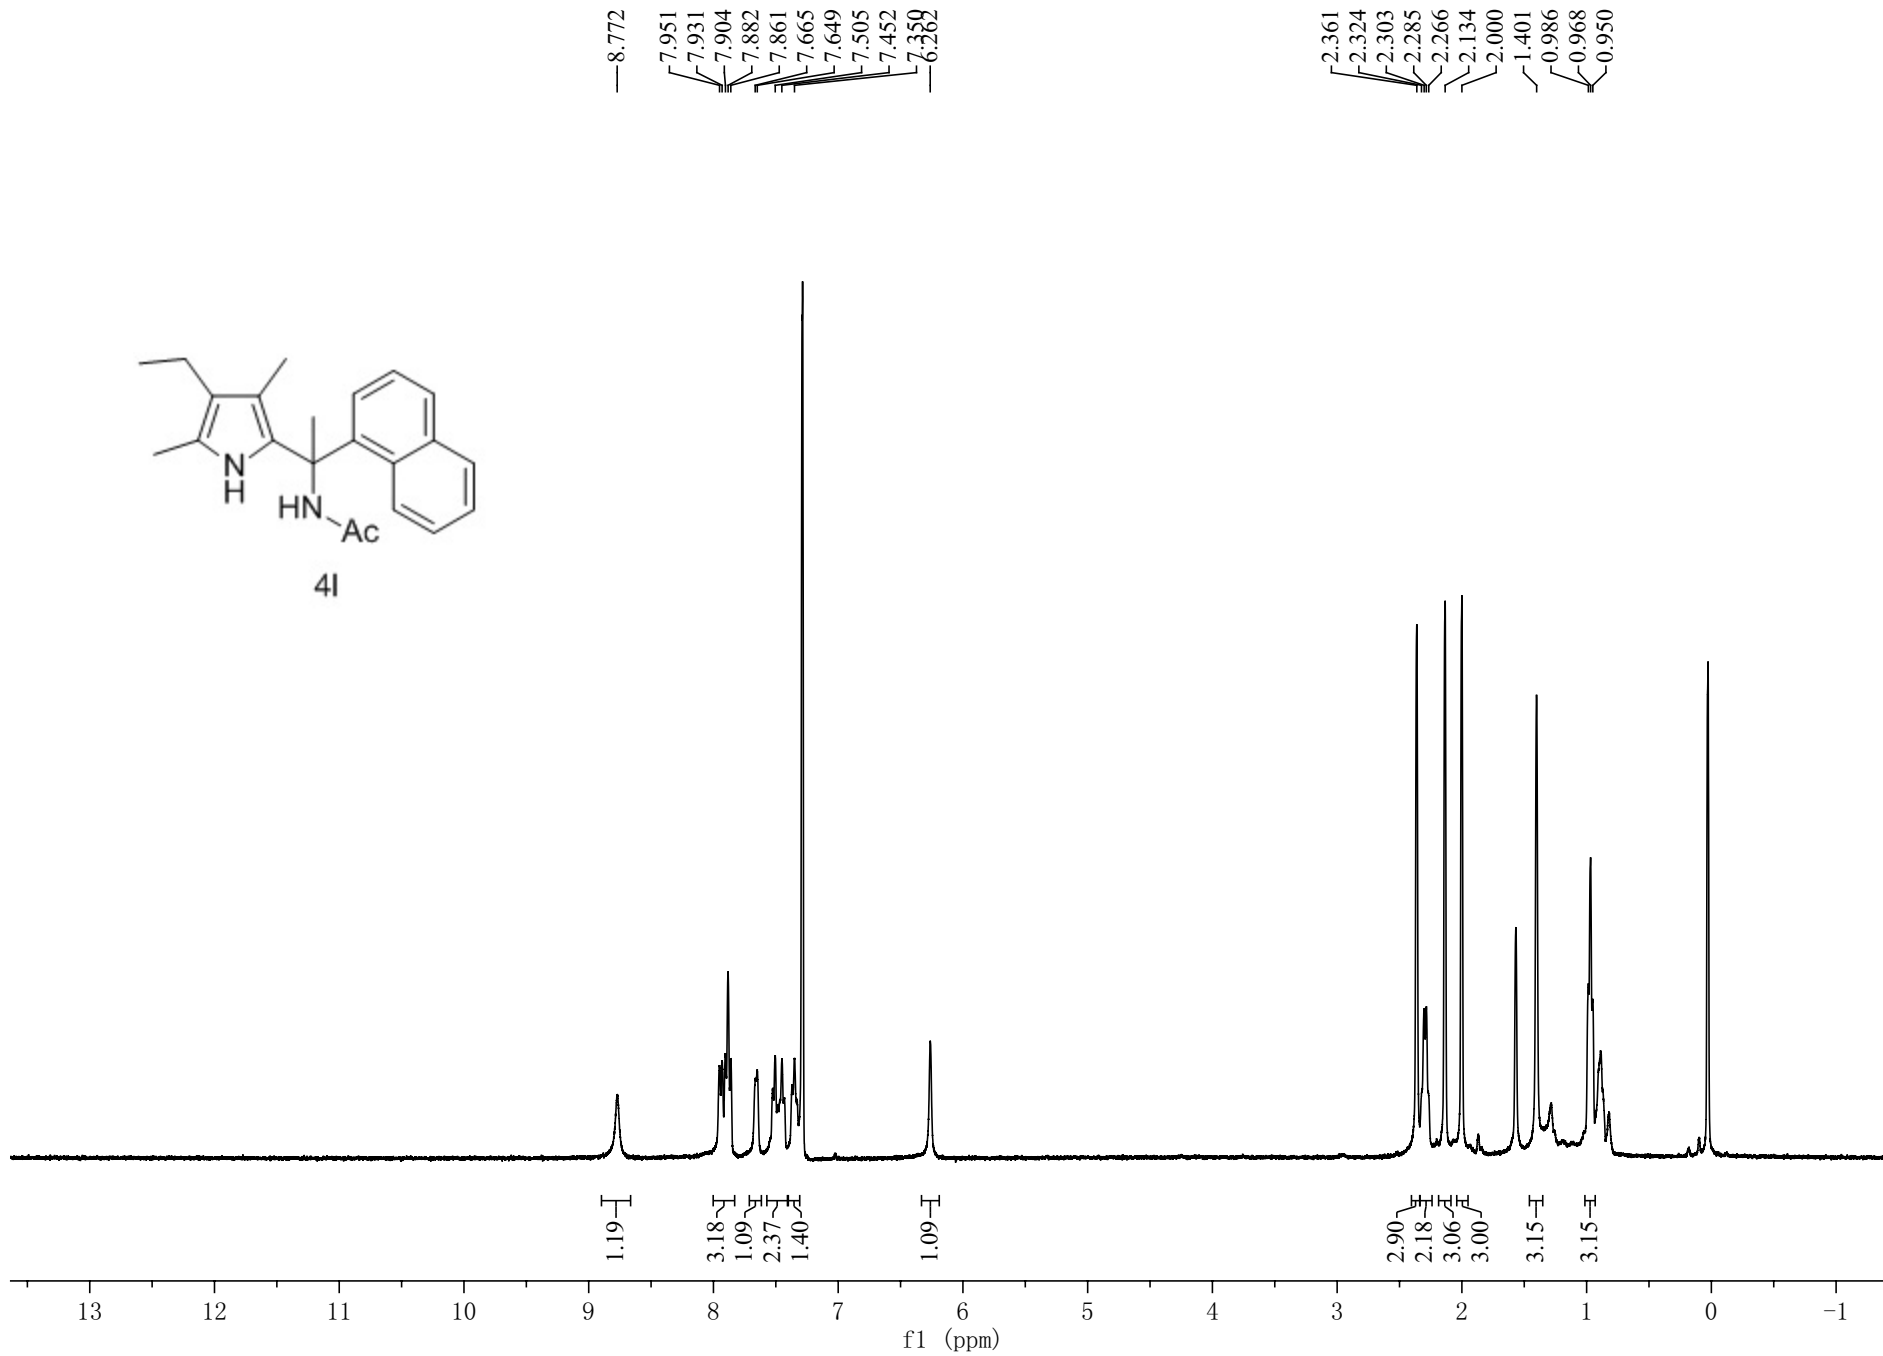

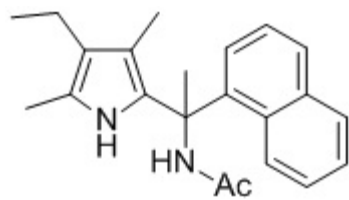

4I

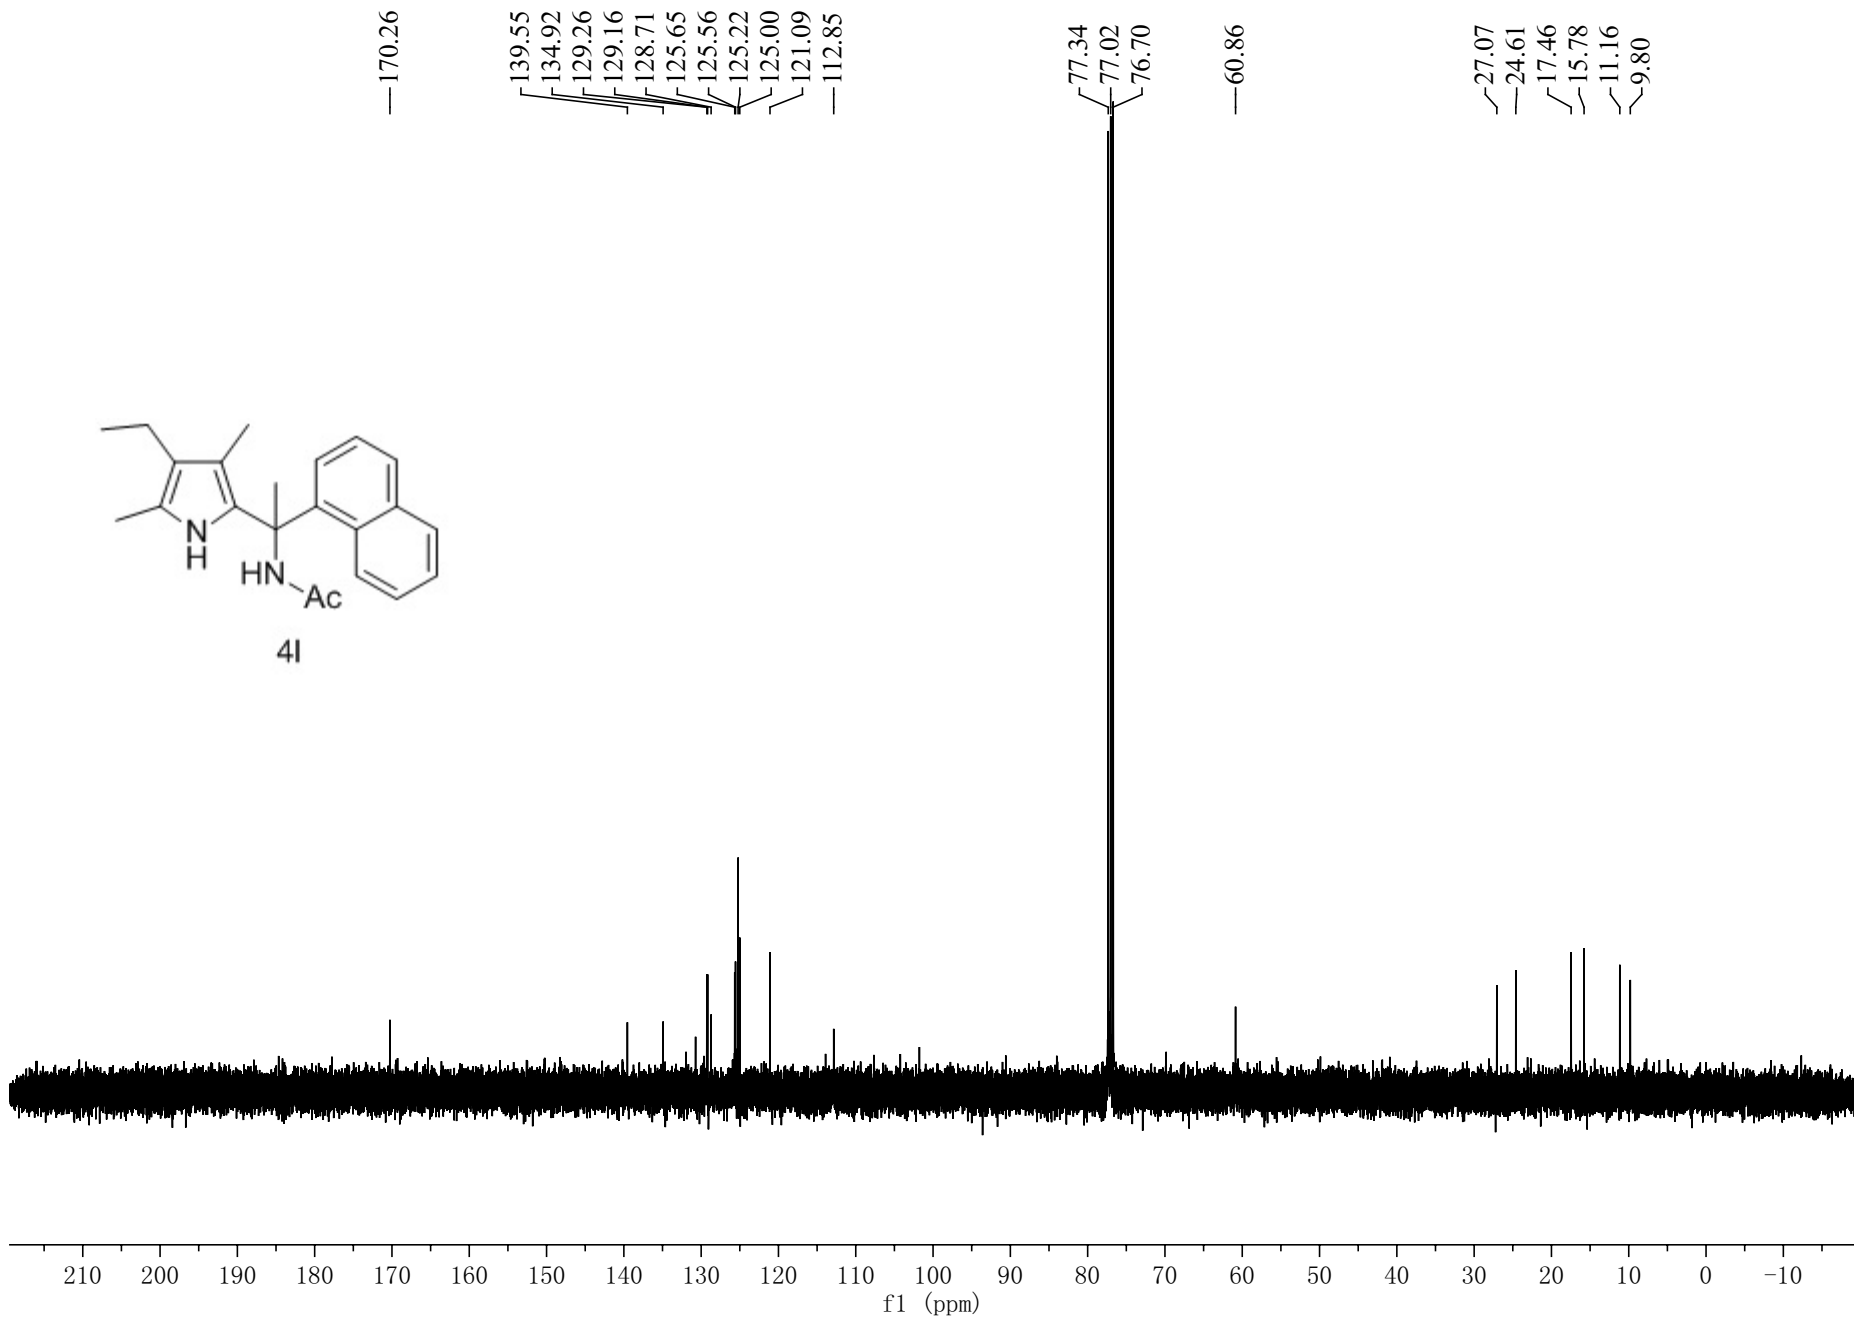

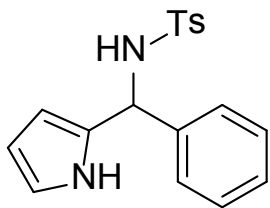

6a

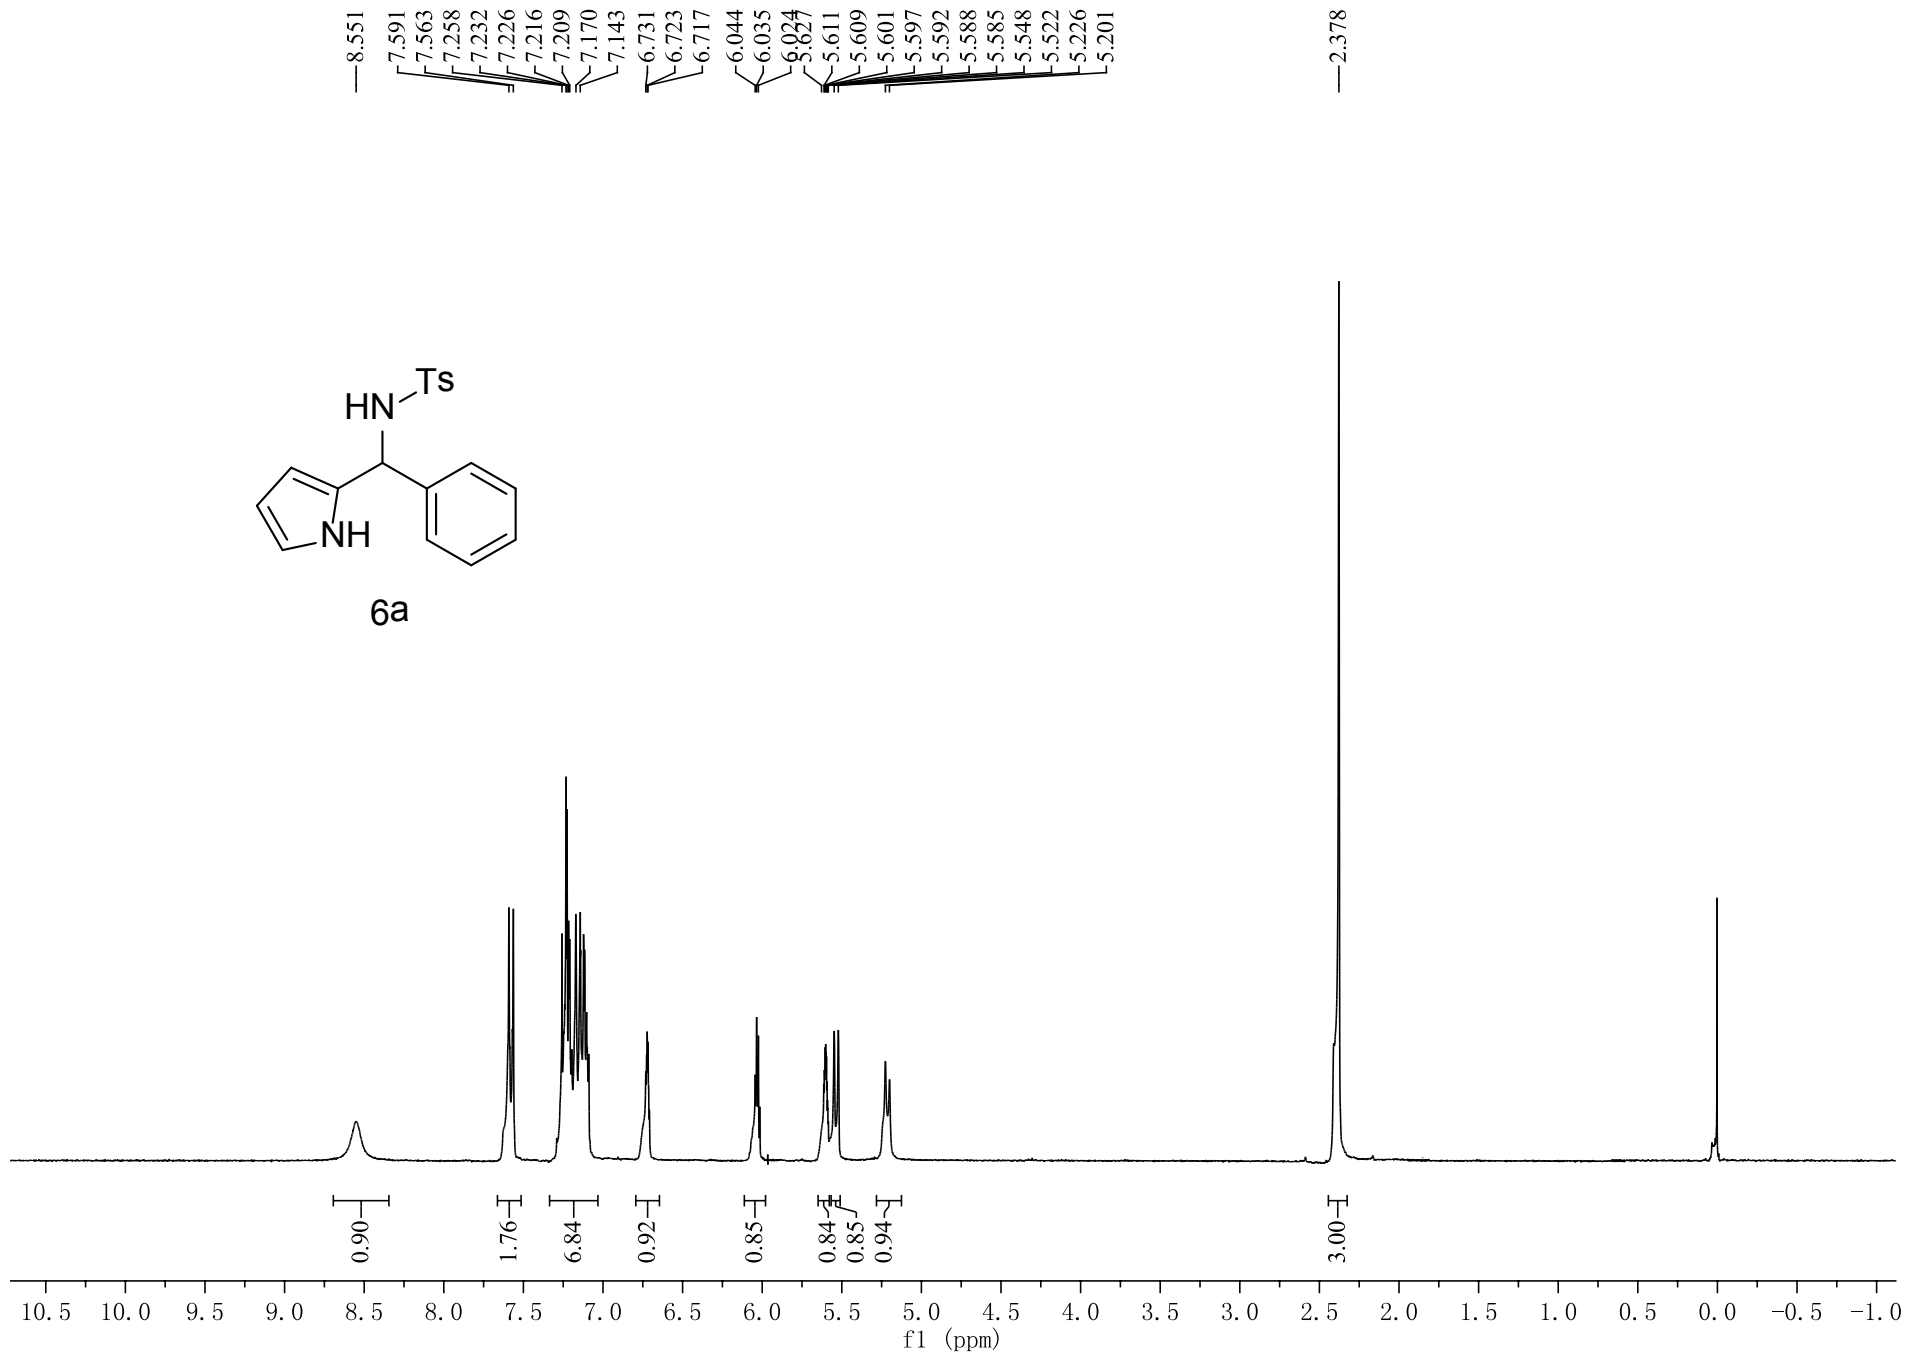

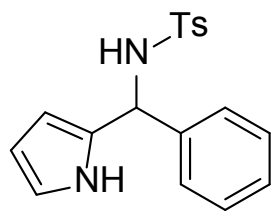

6a

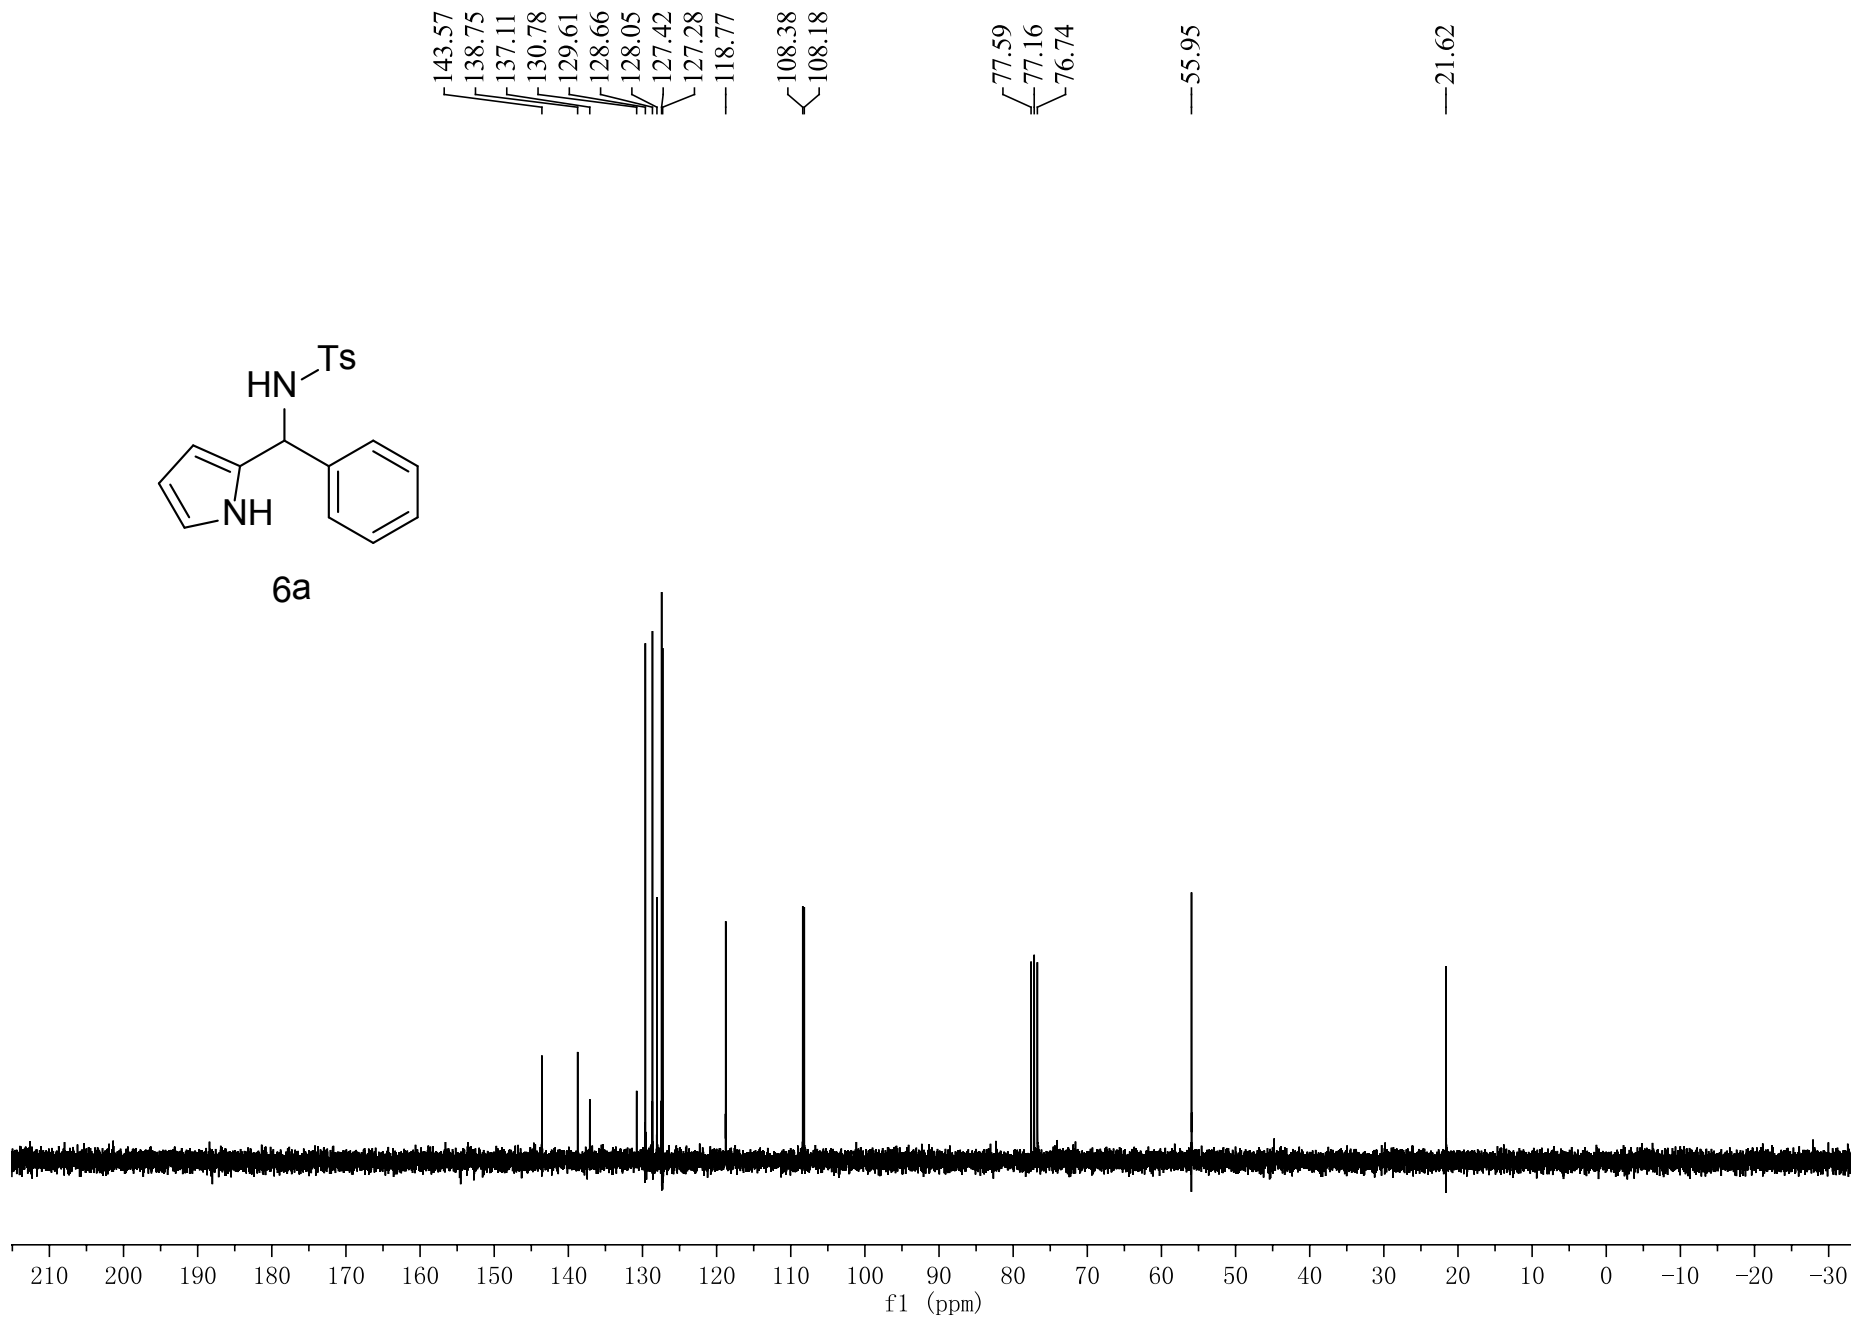

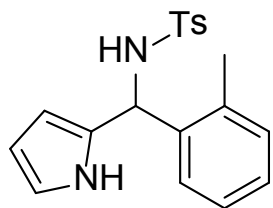

6b

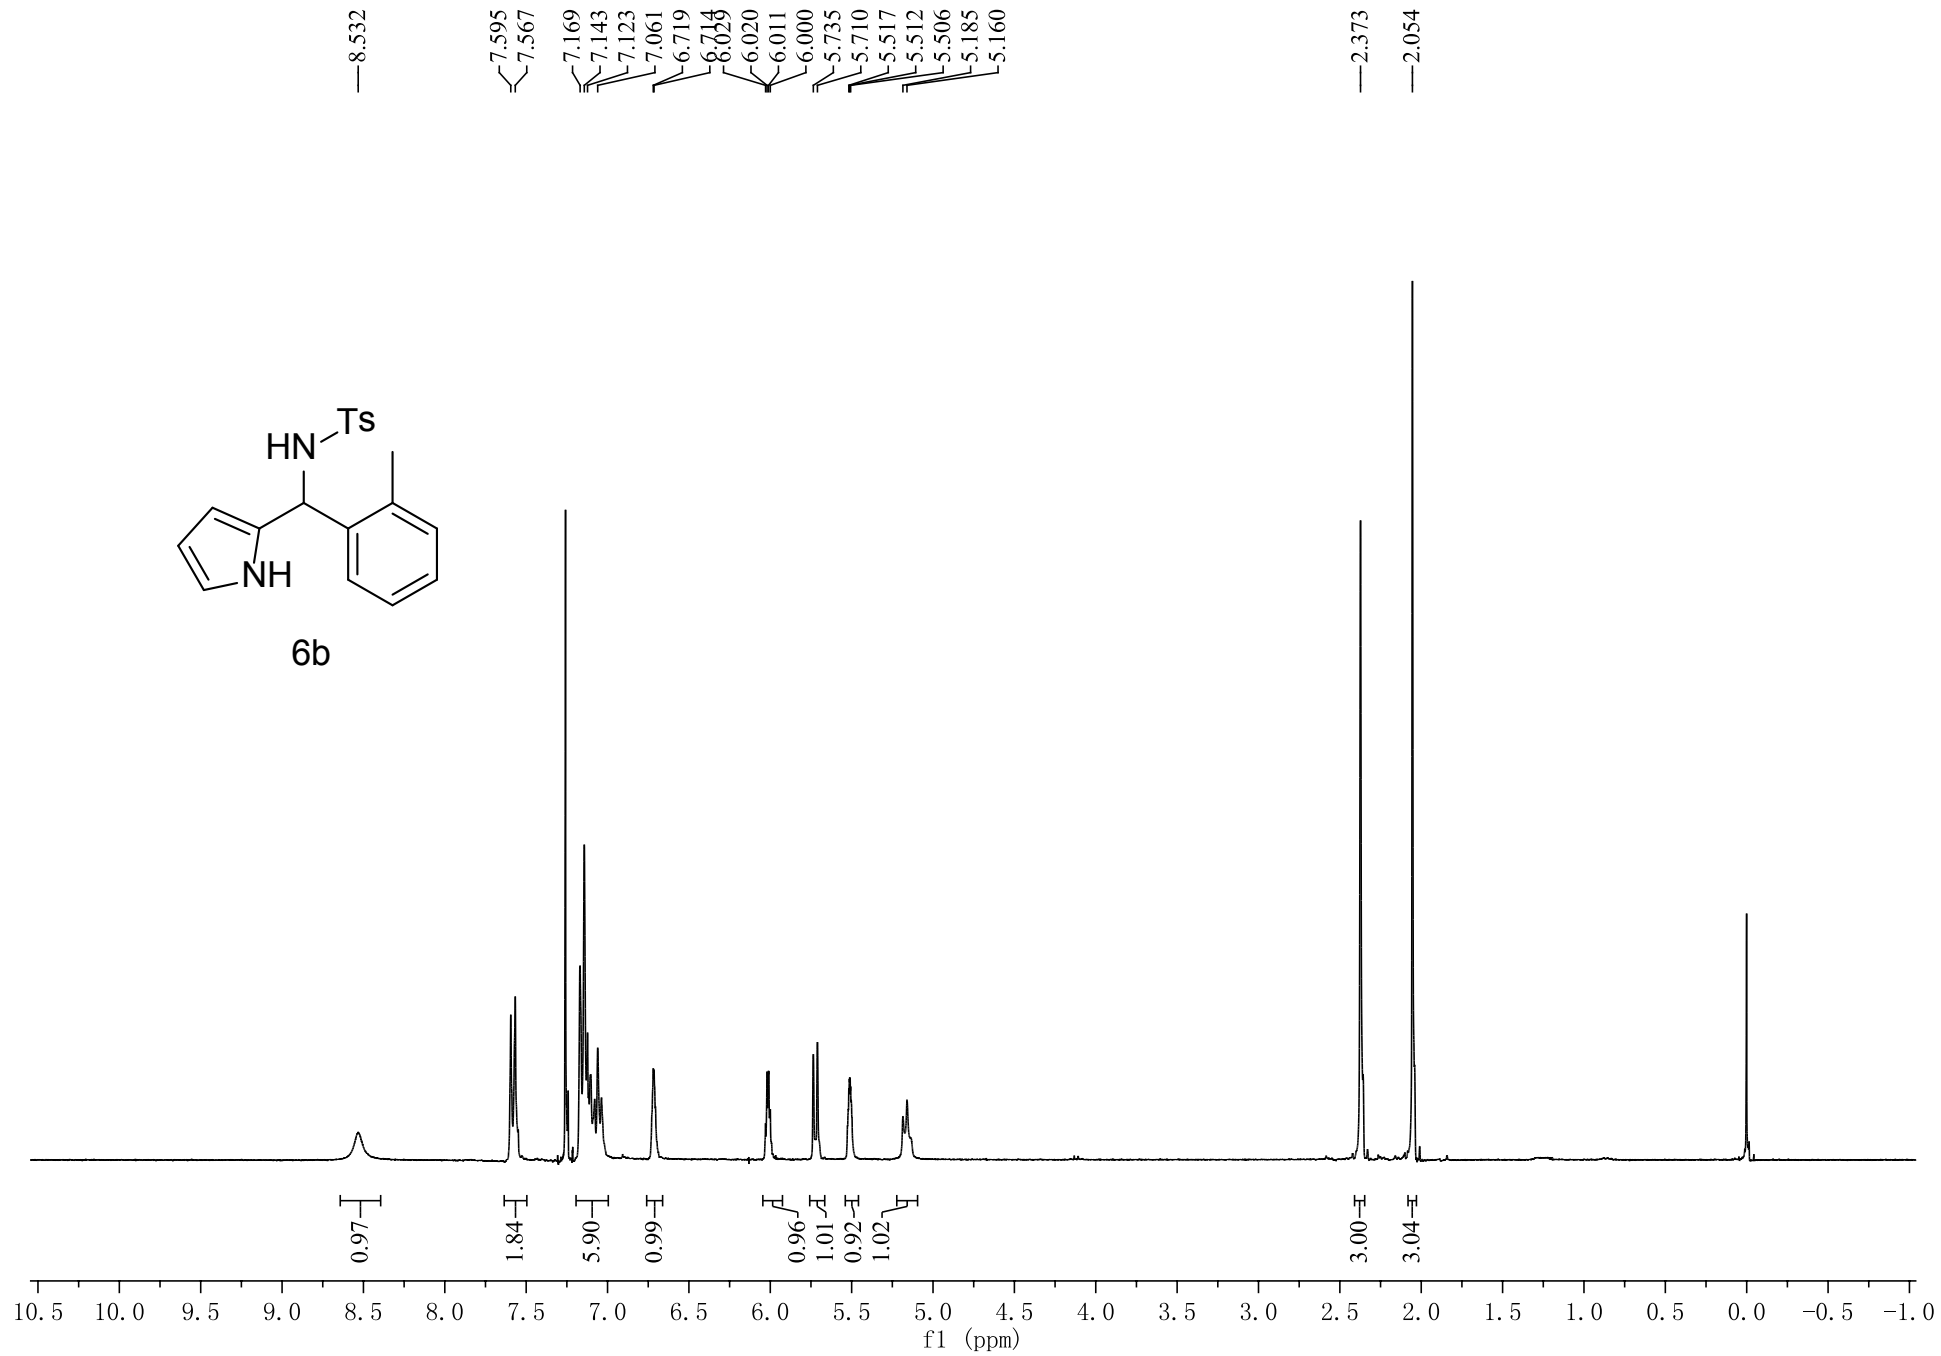



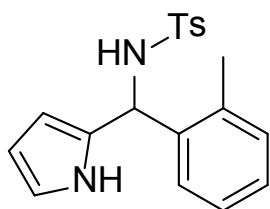

6b

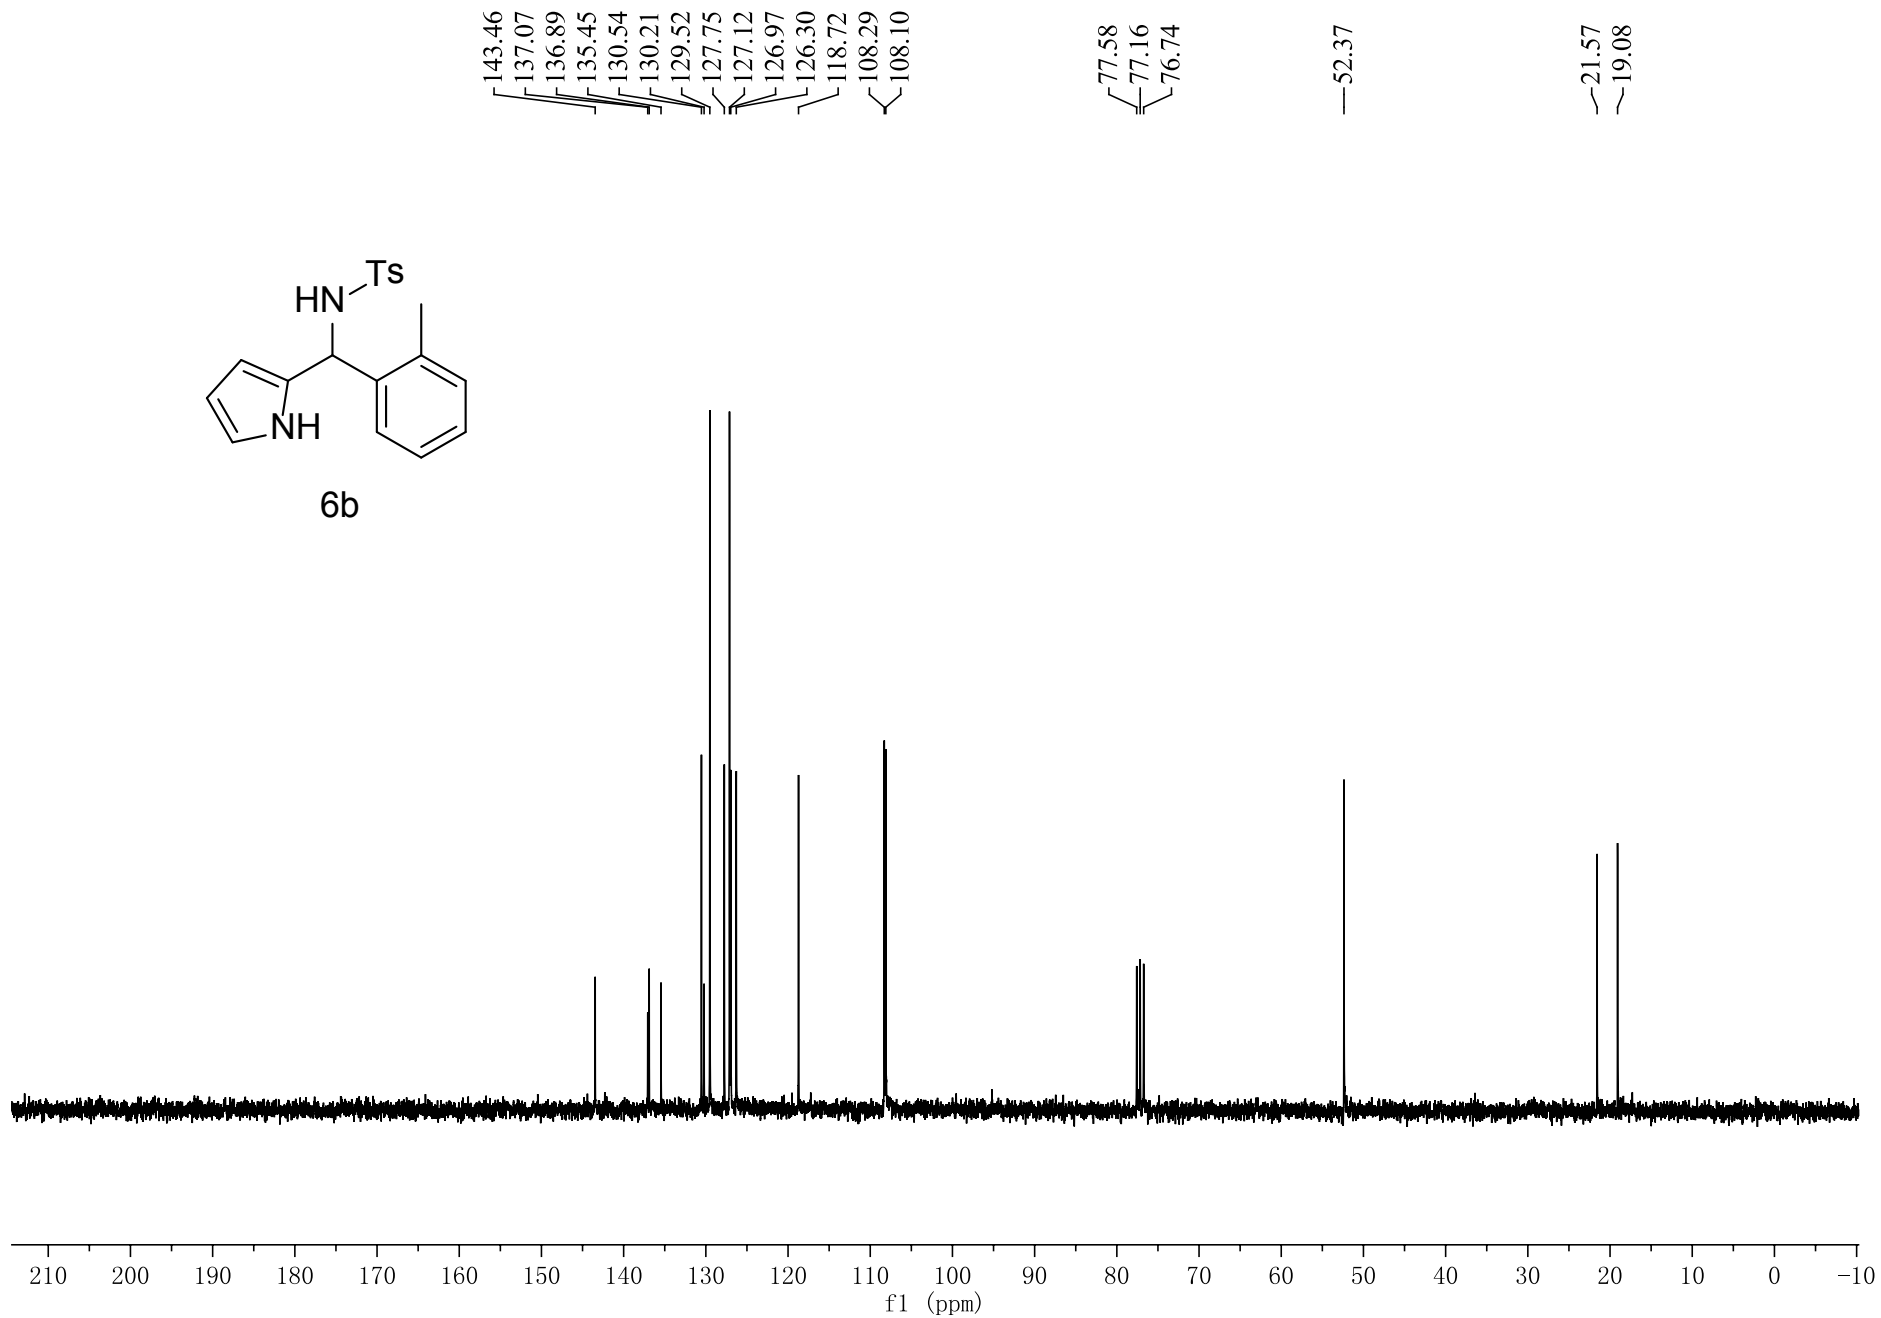

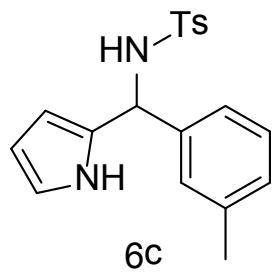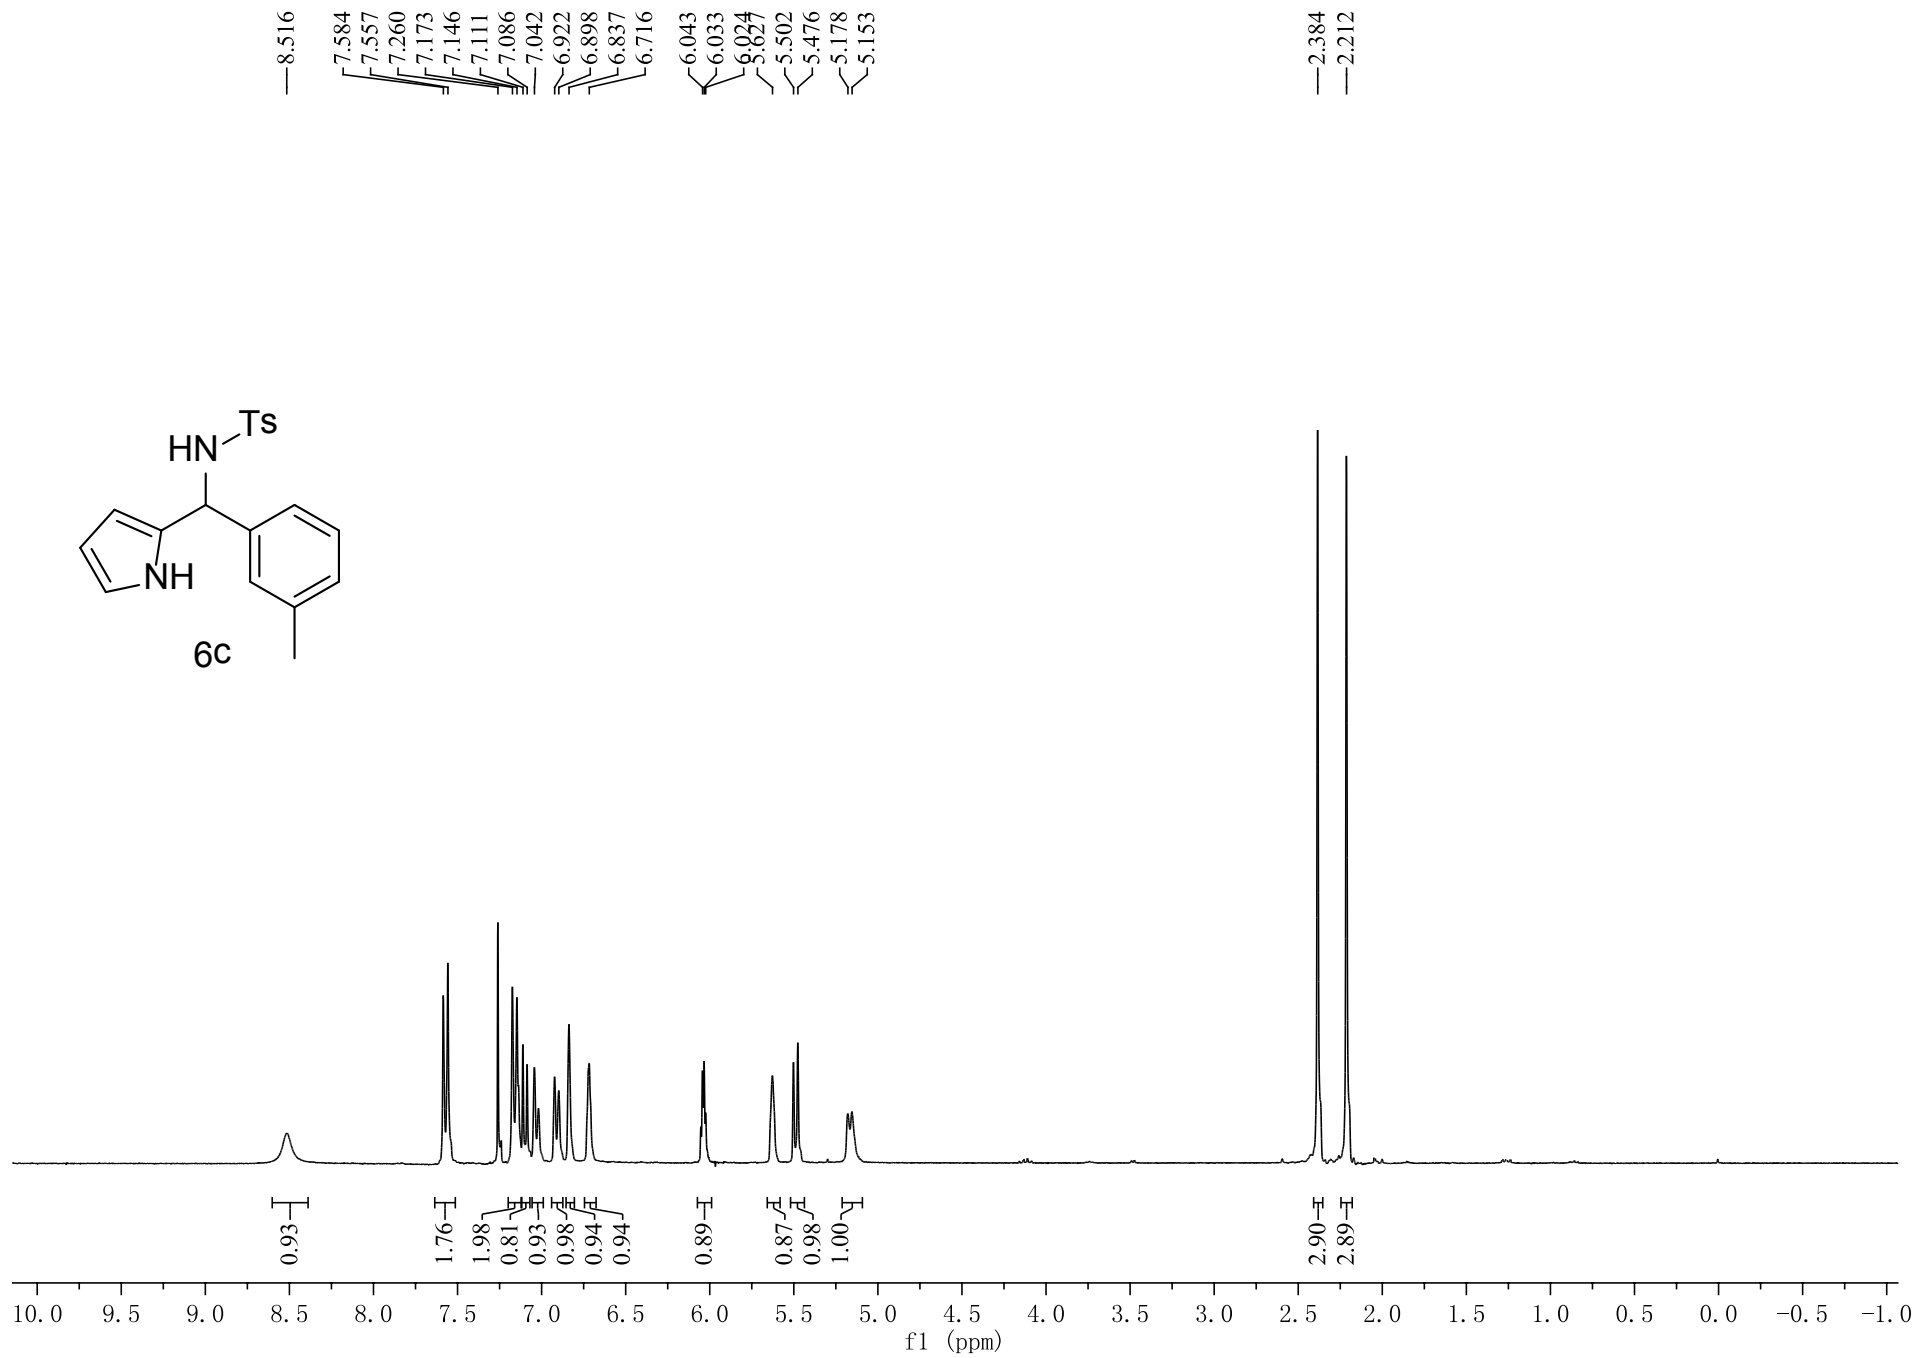

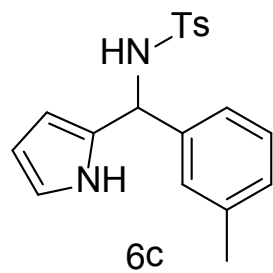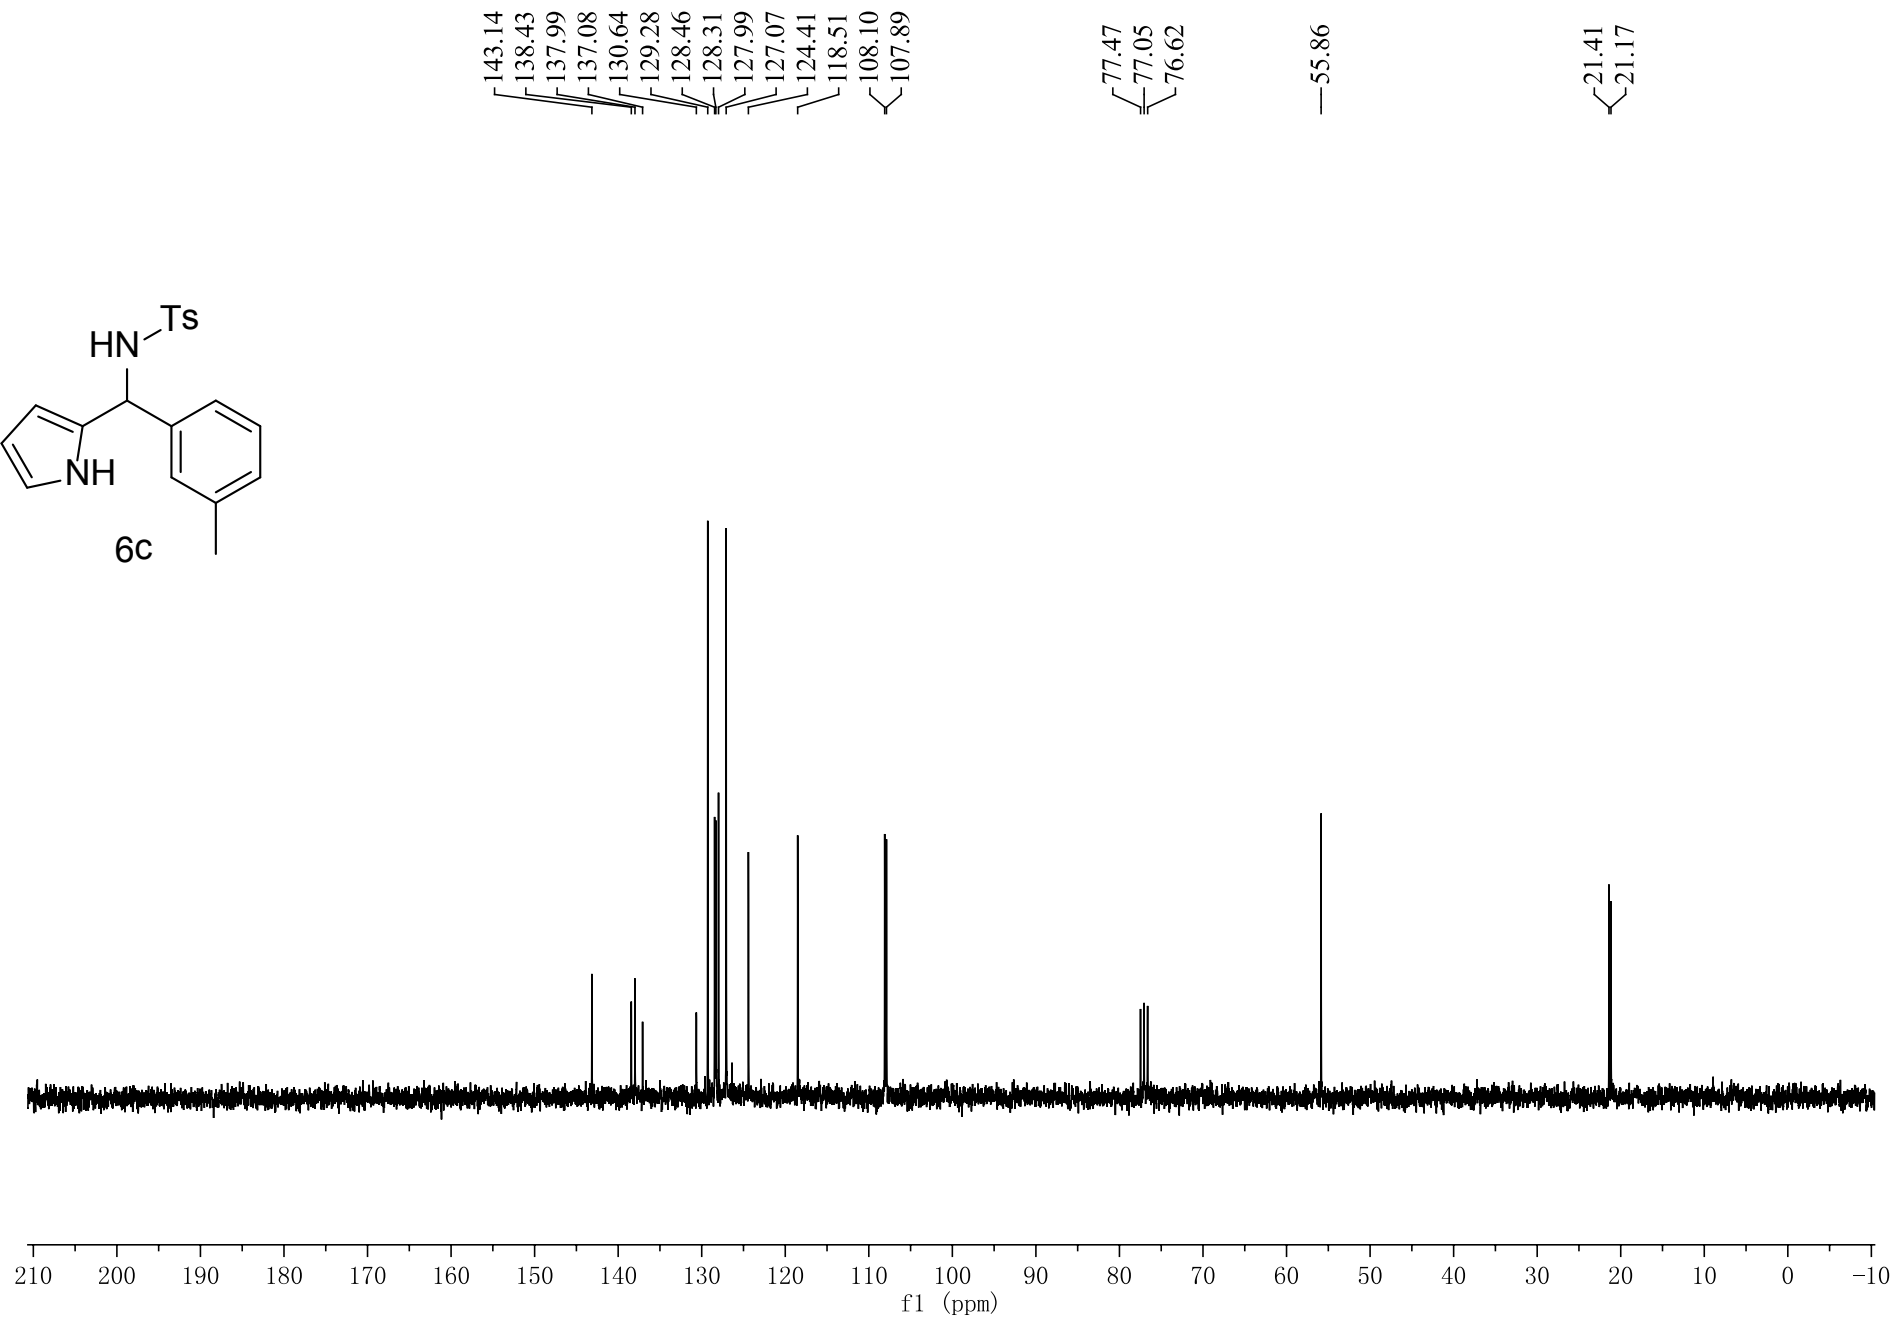

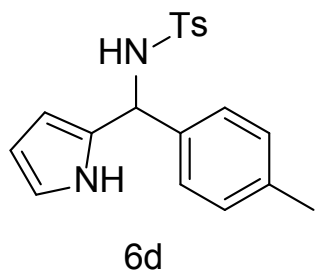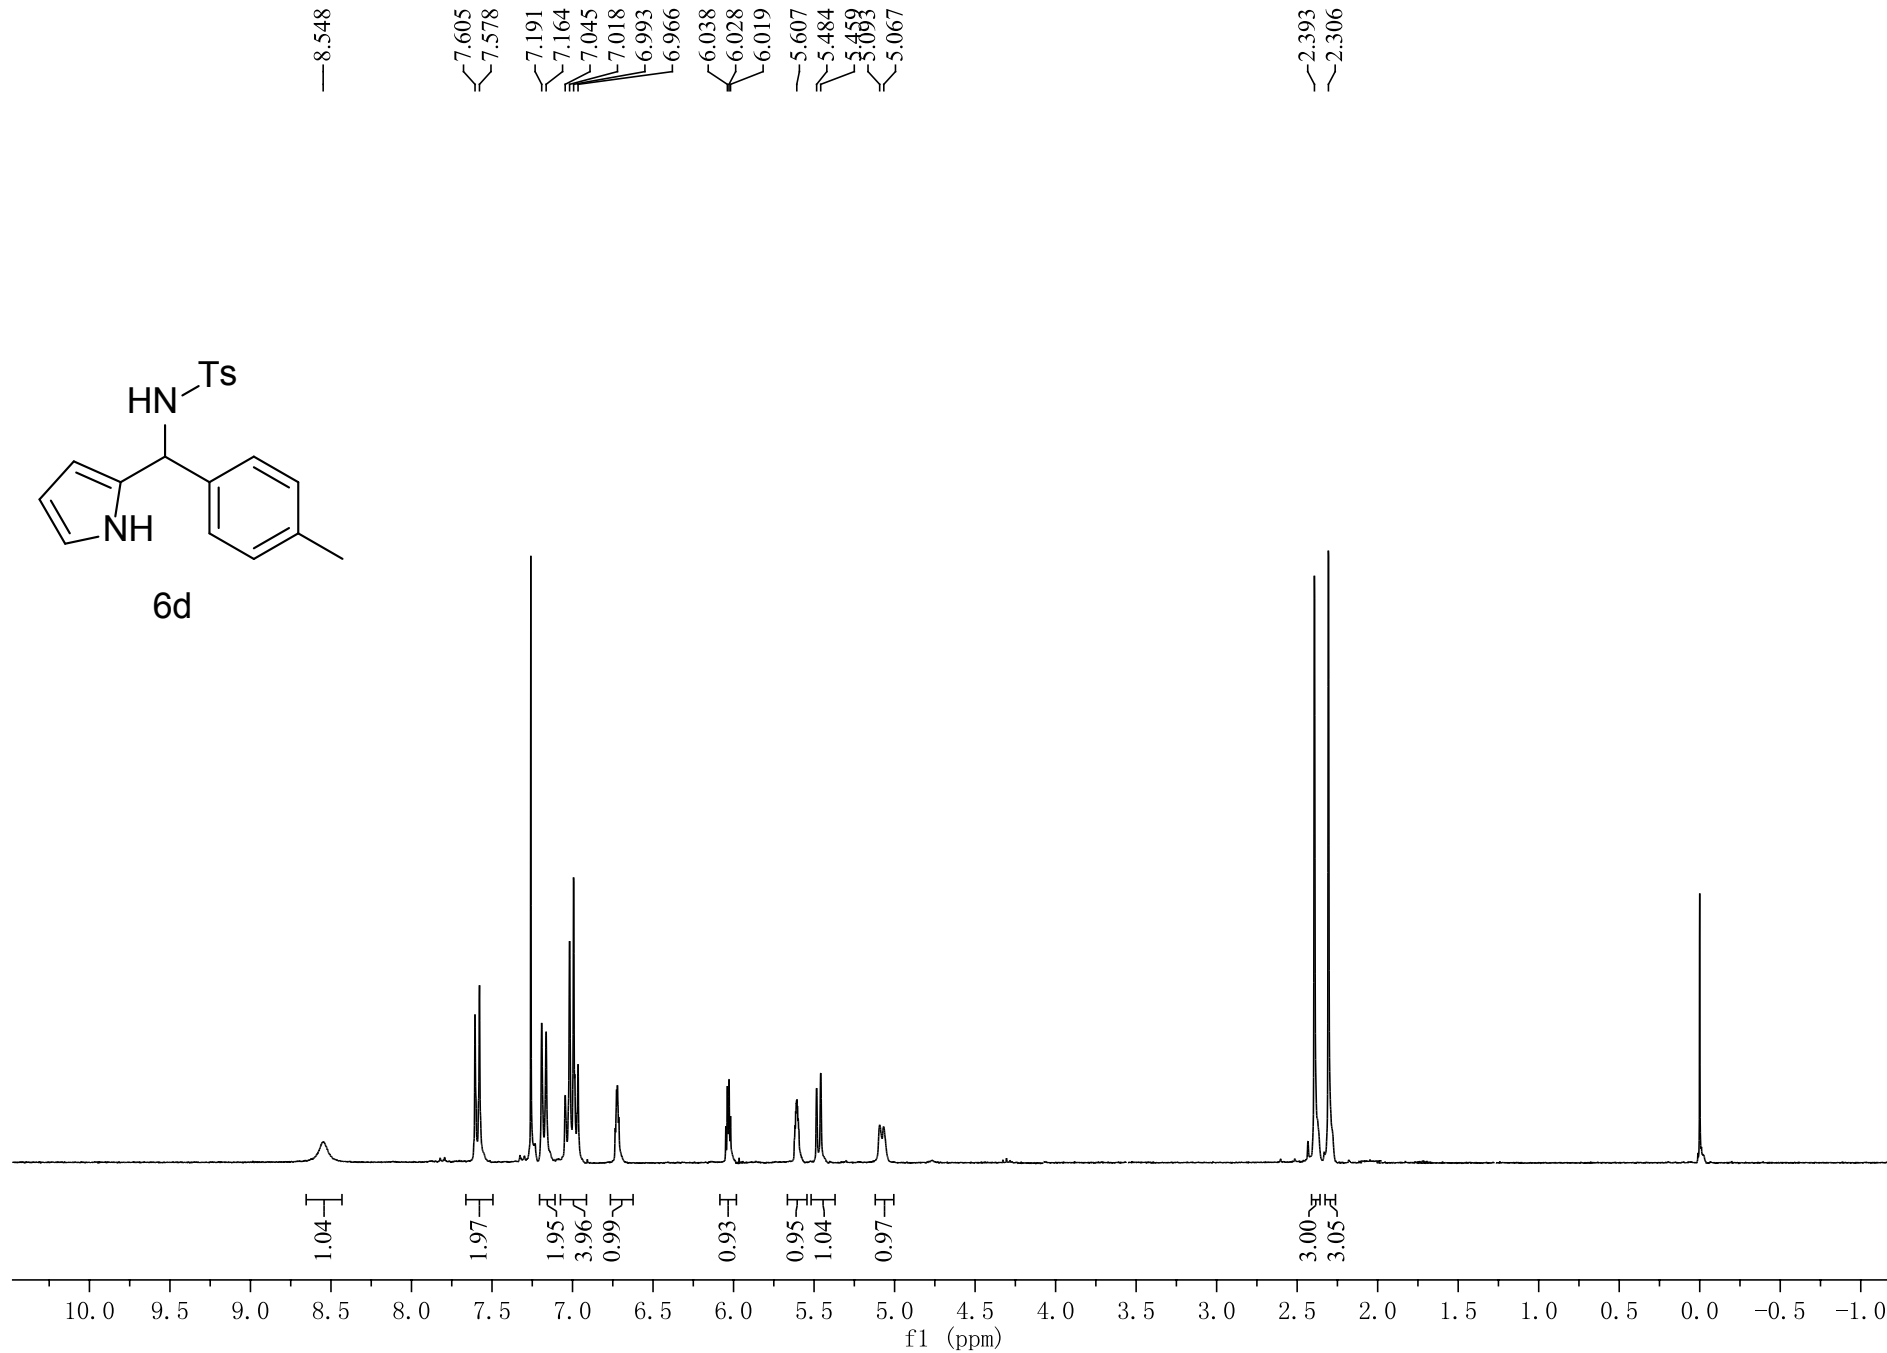

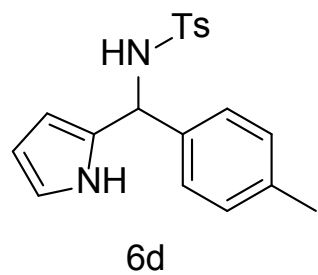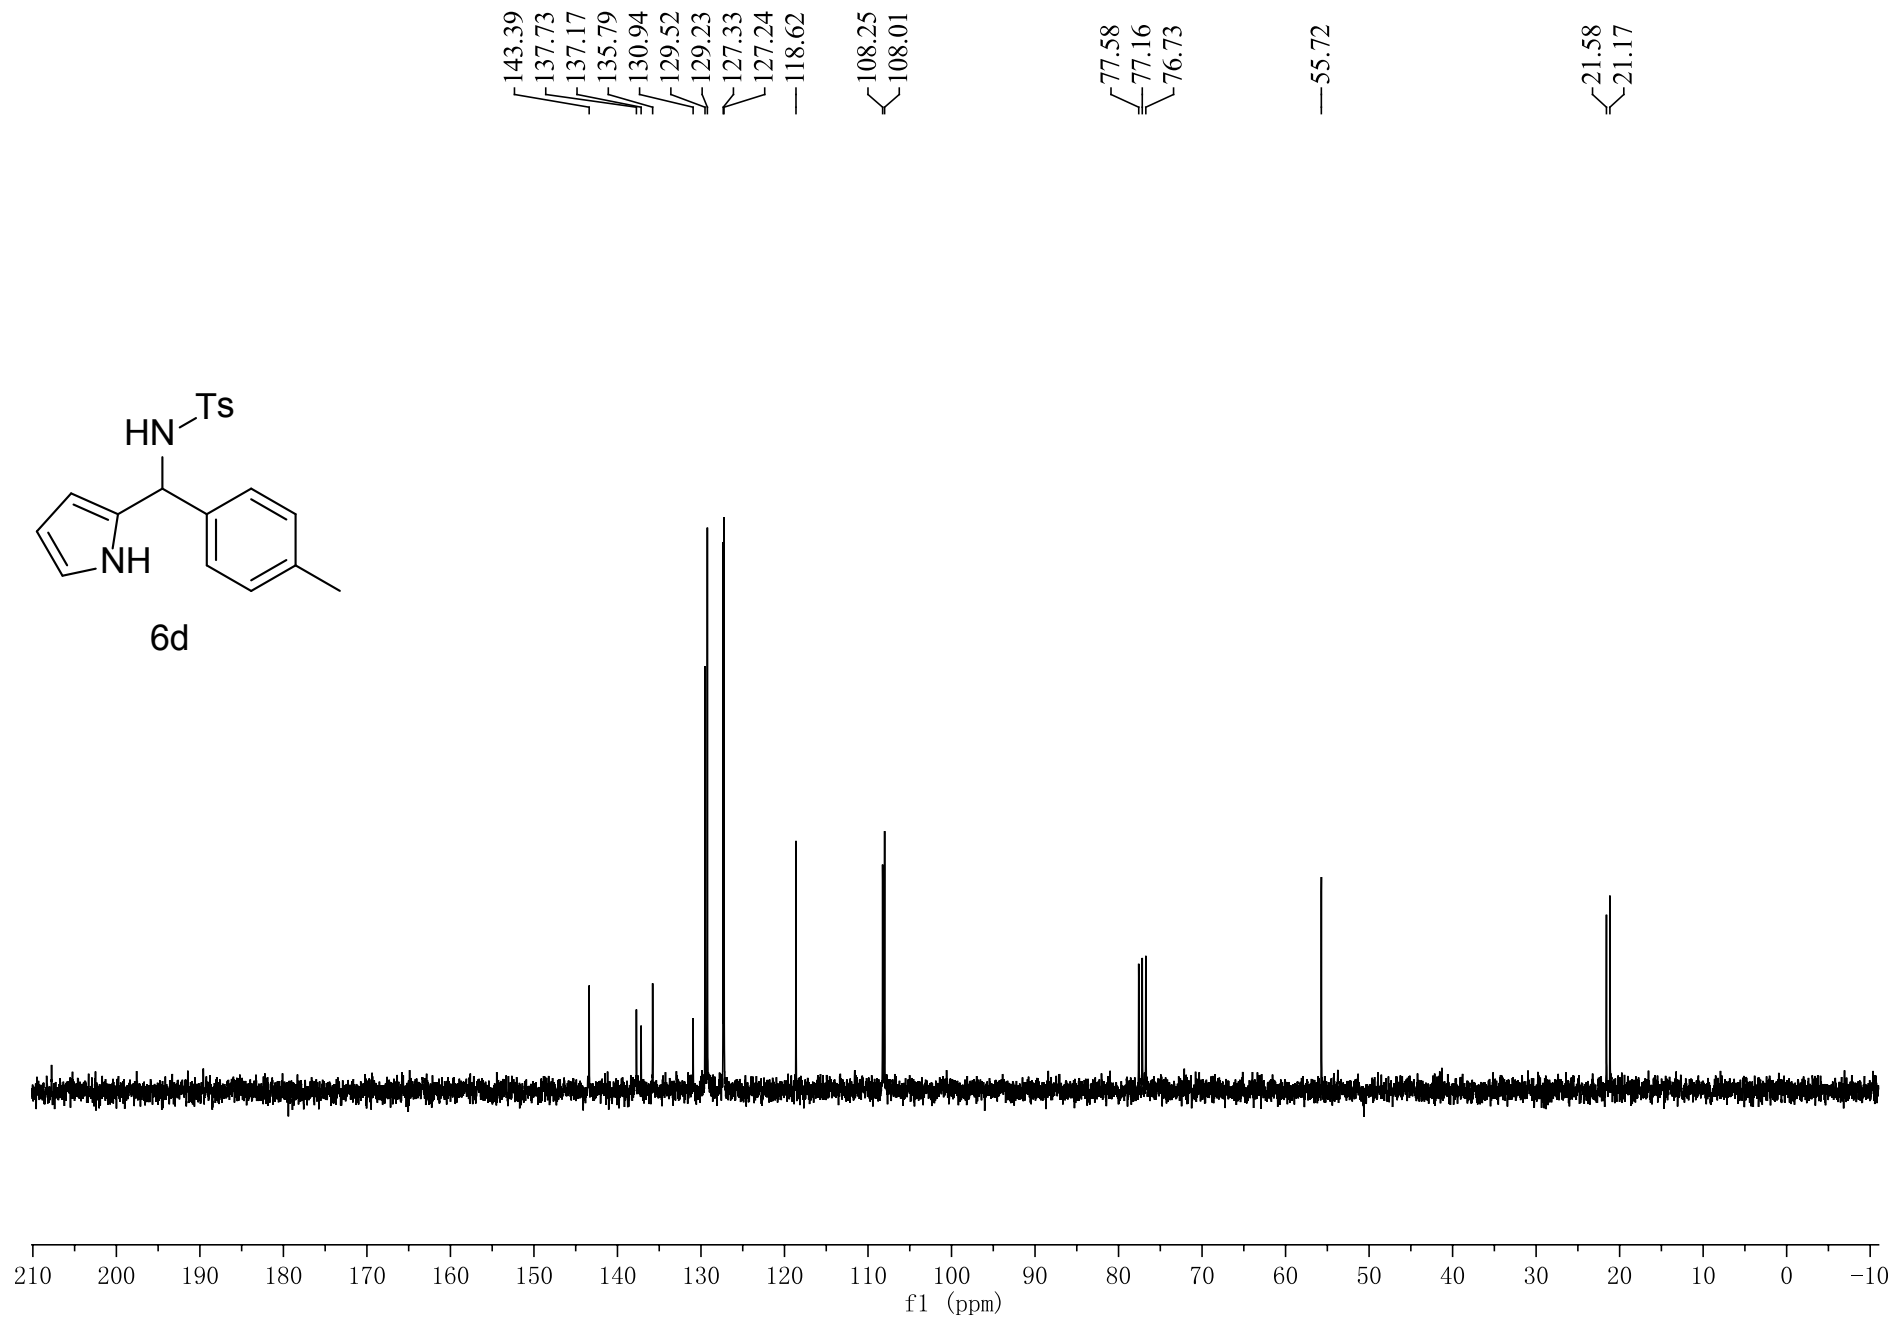

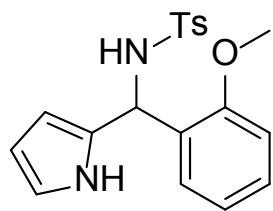

6e

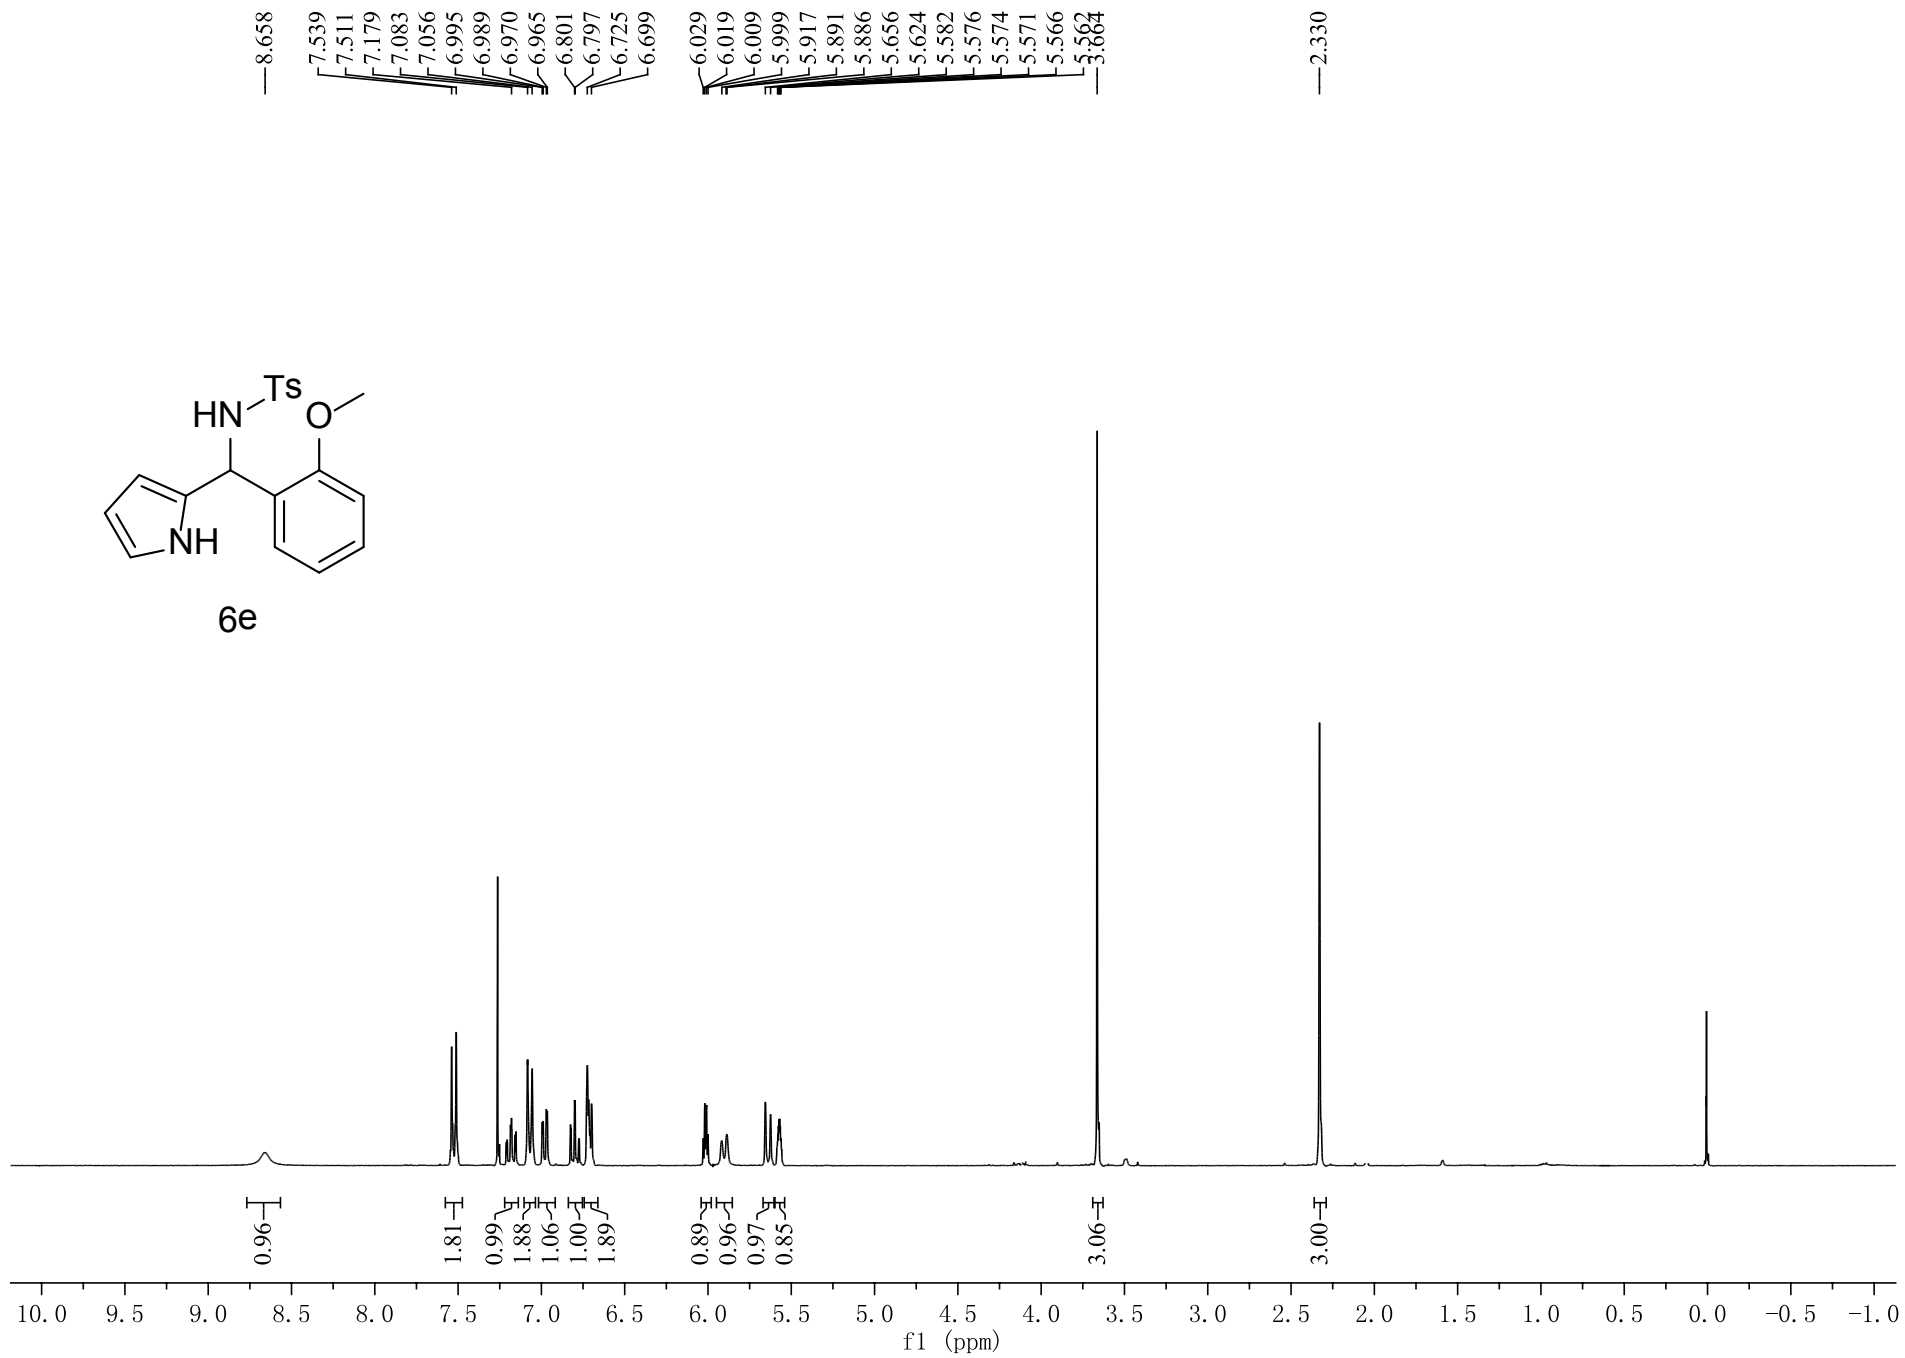

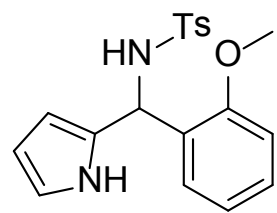

6e

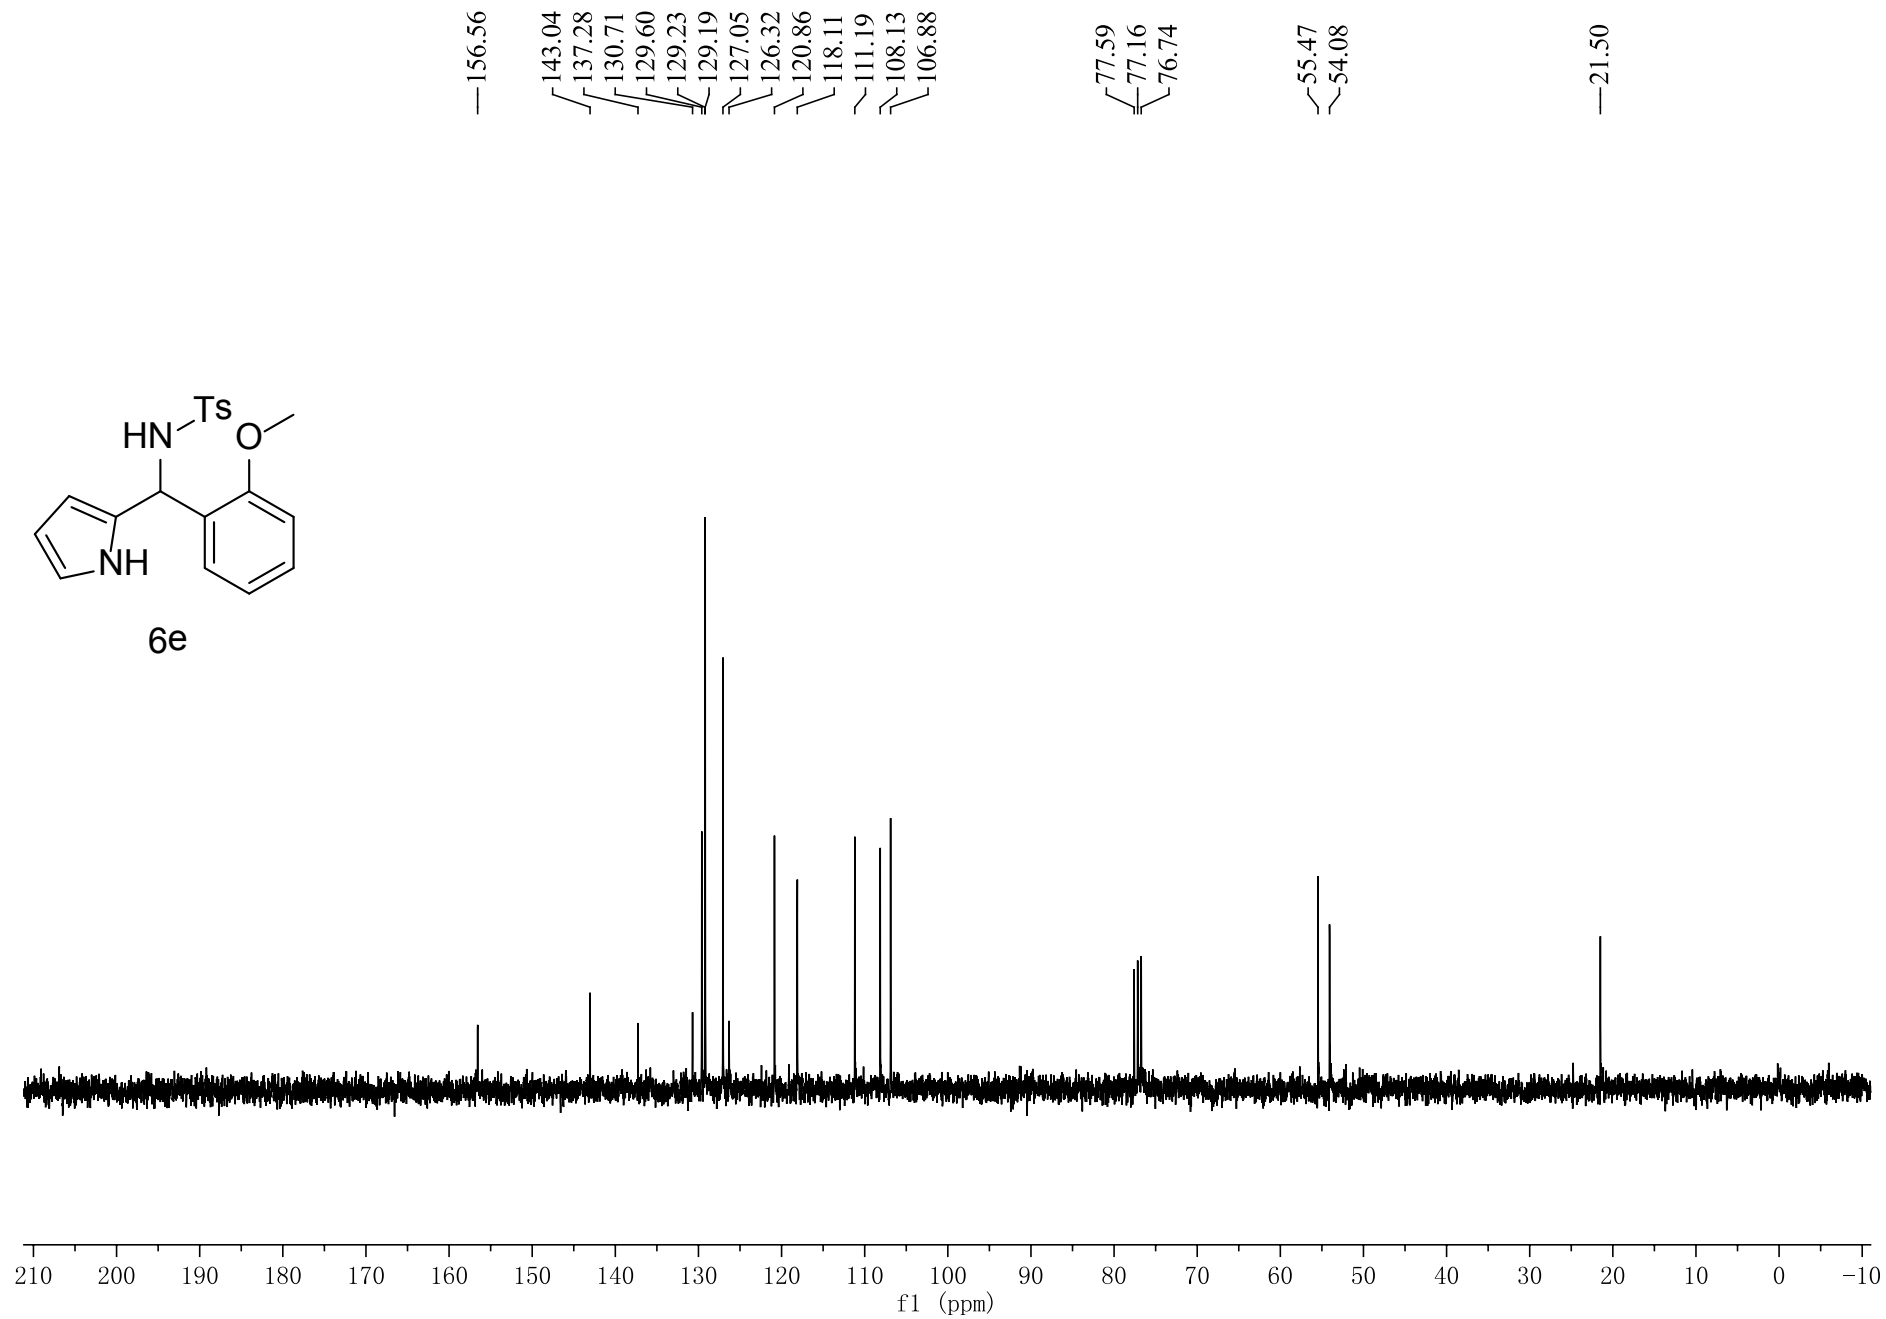

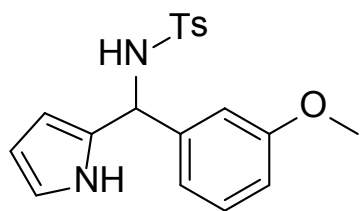

6f

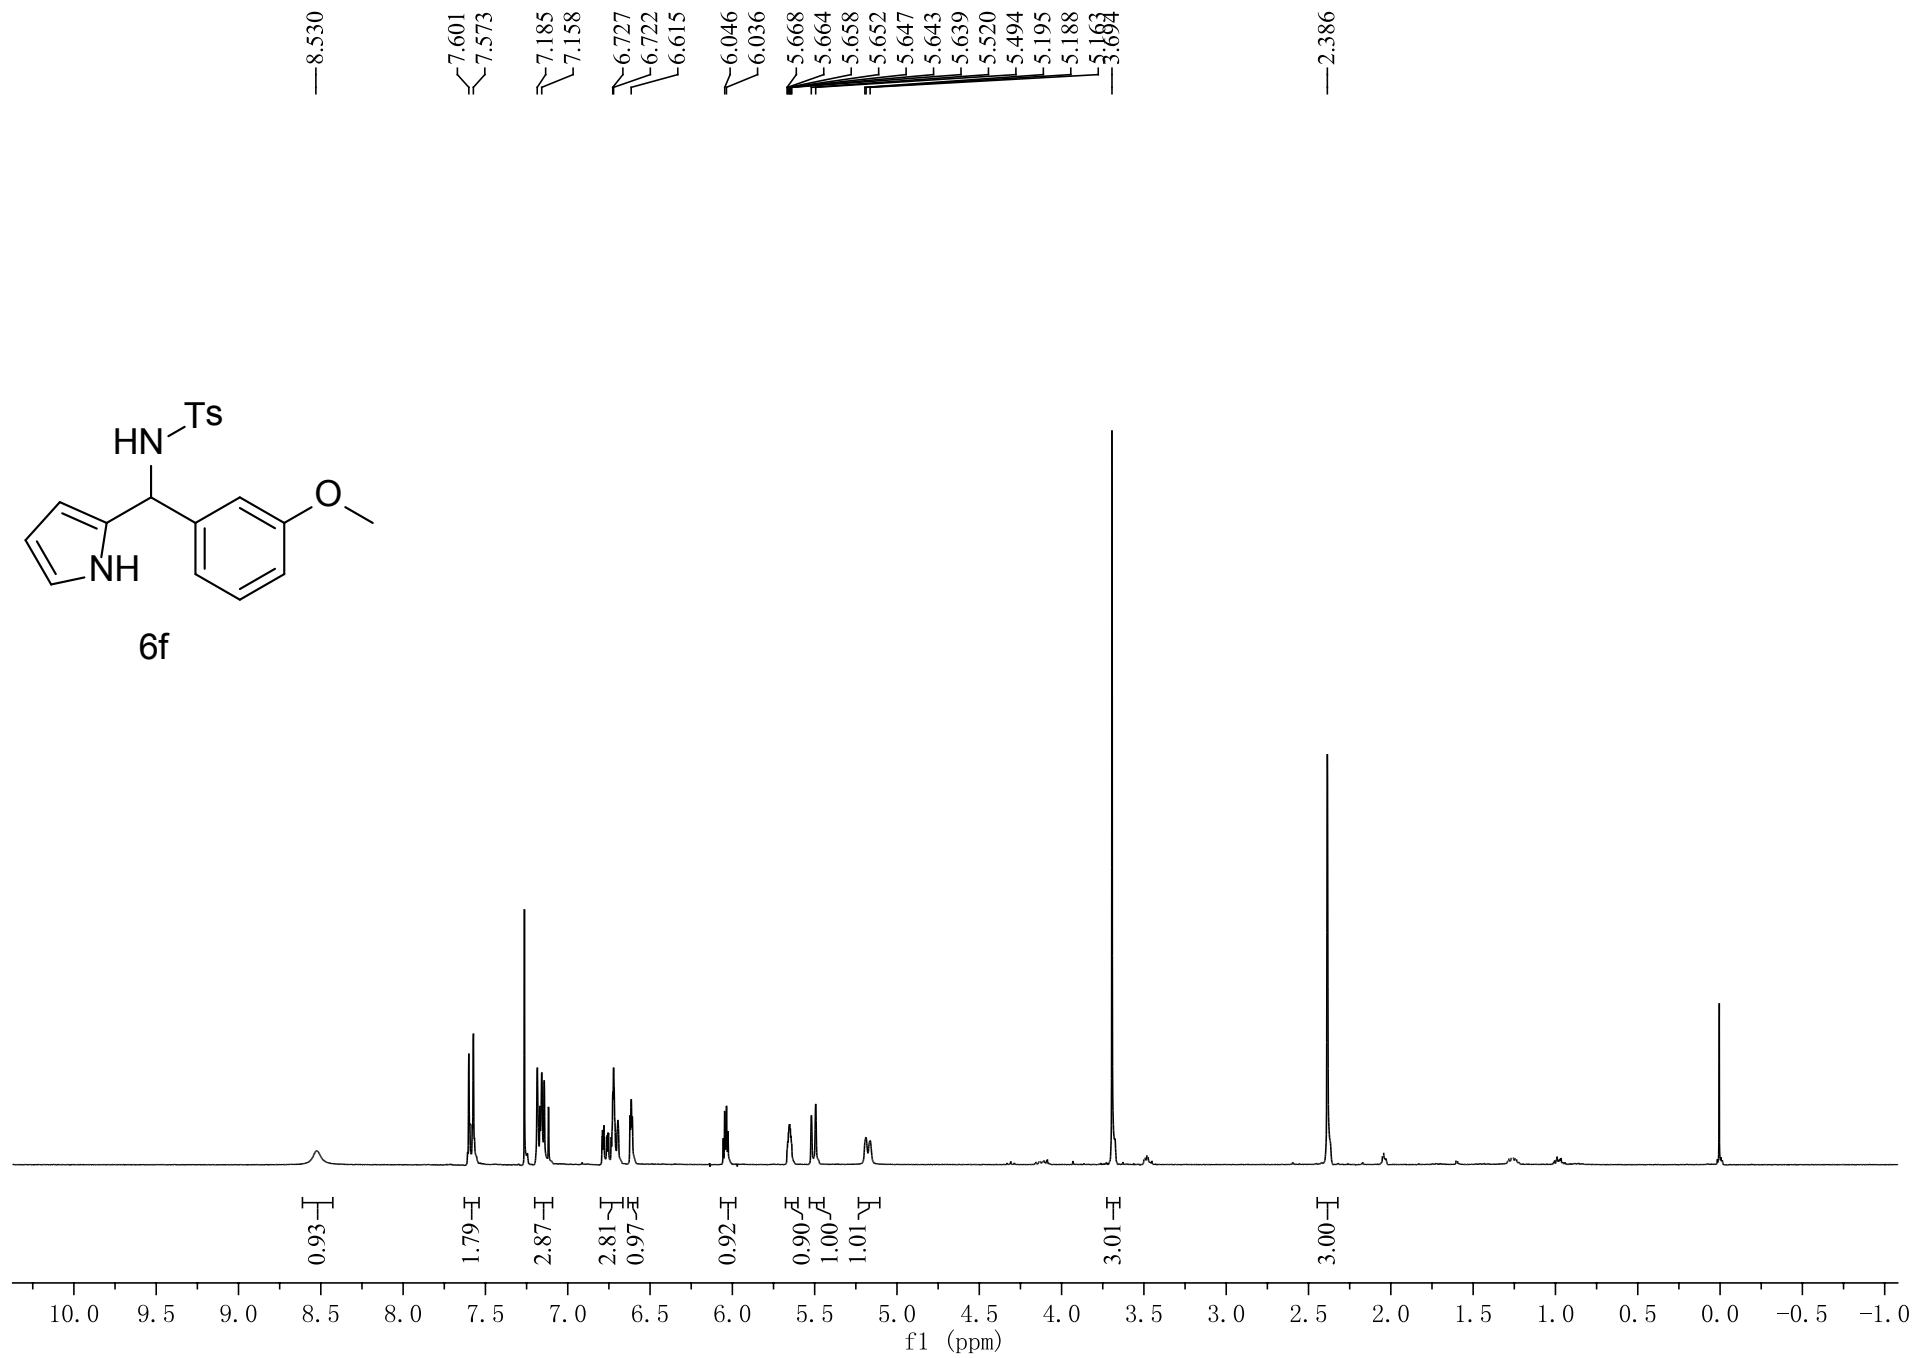



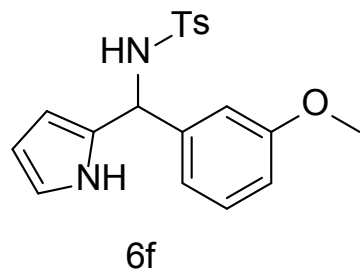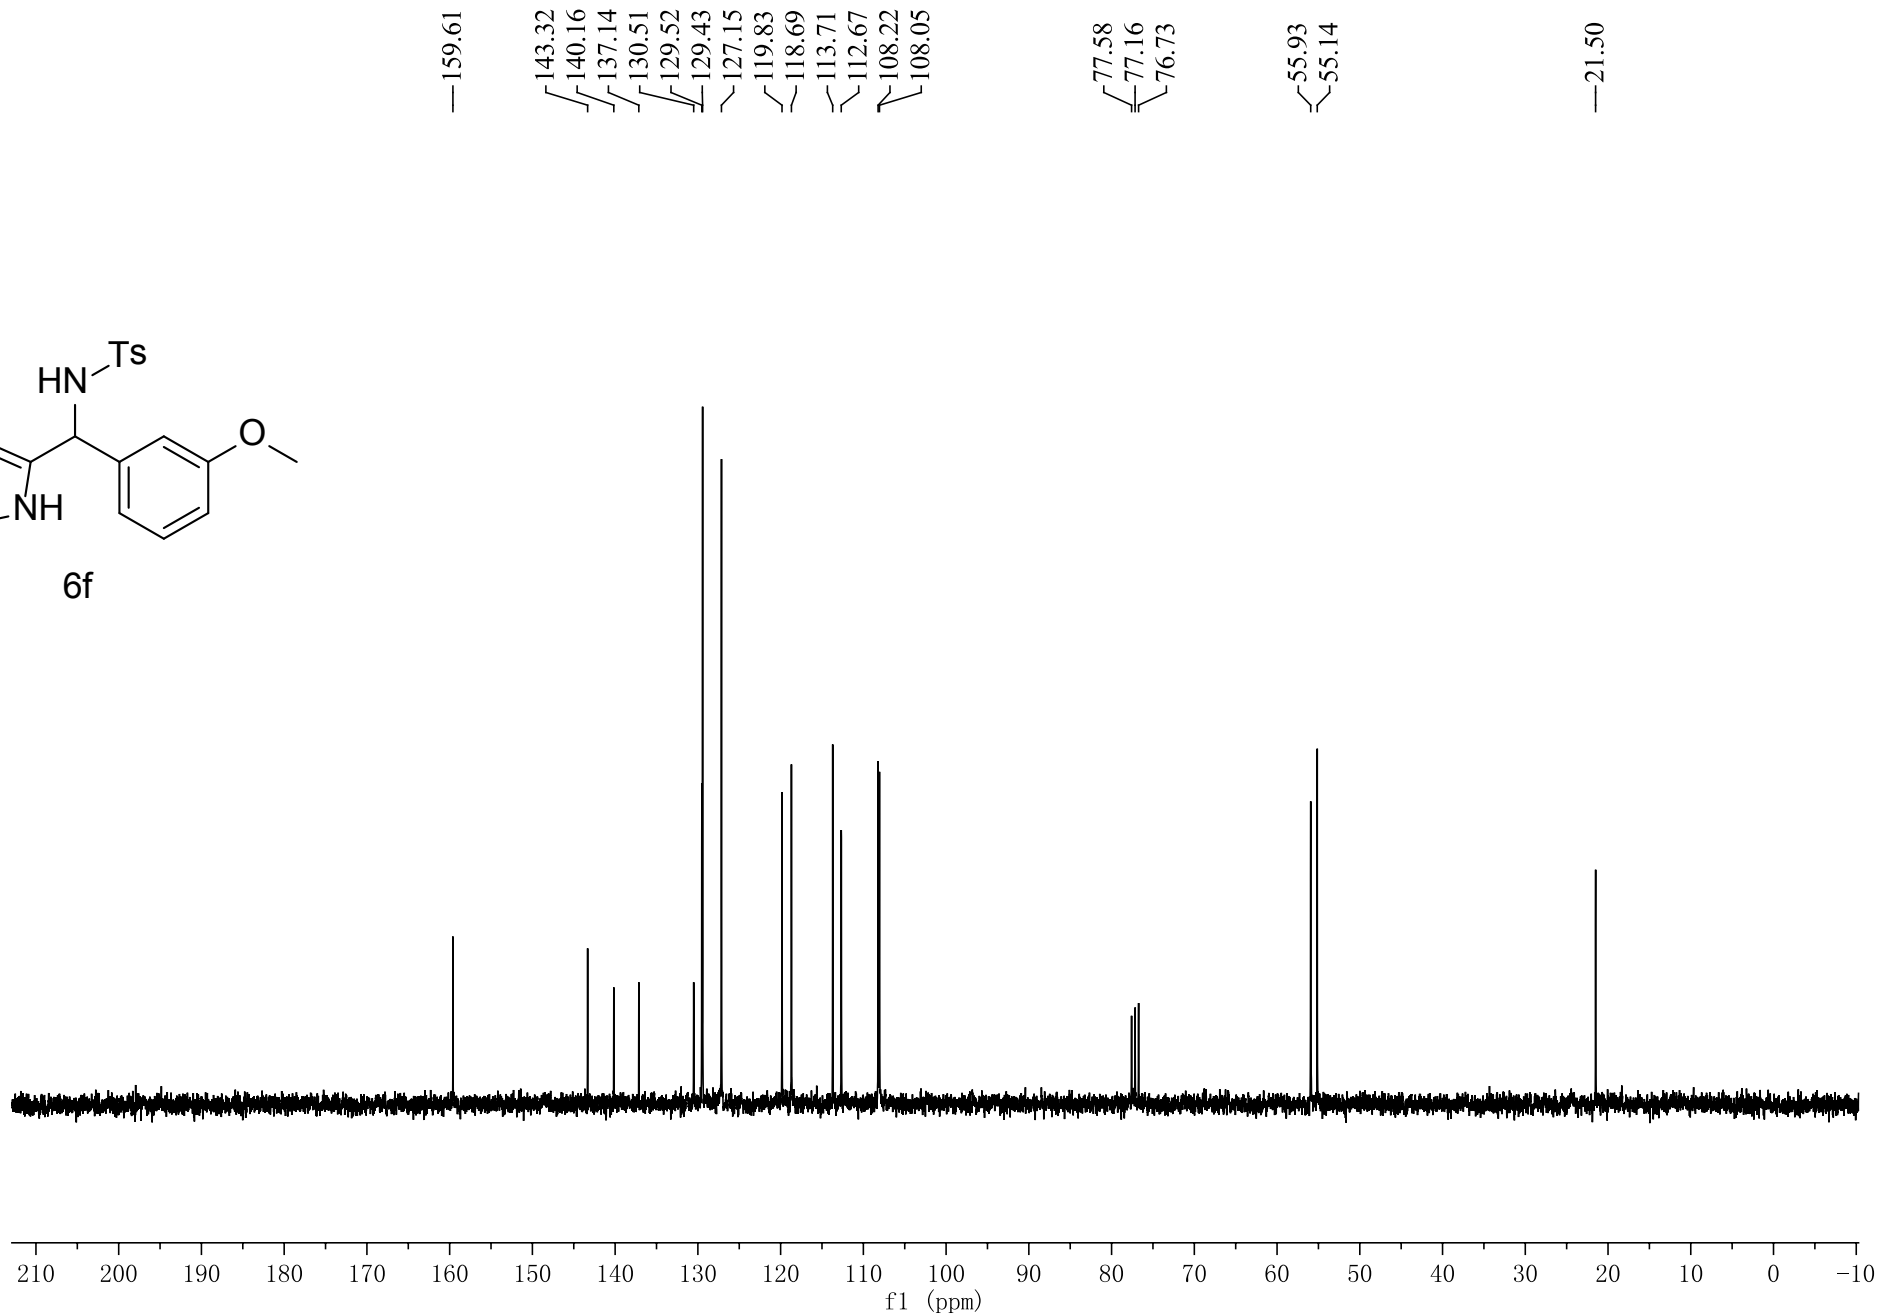

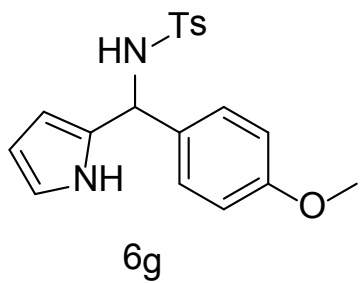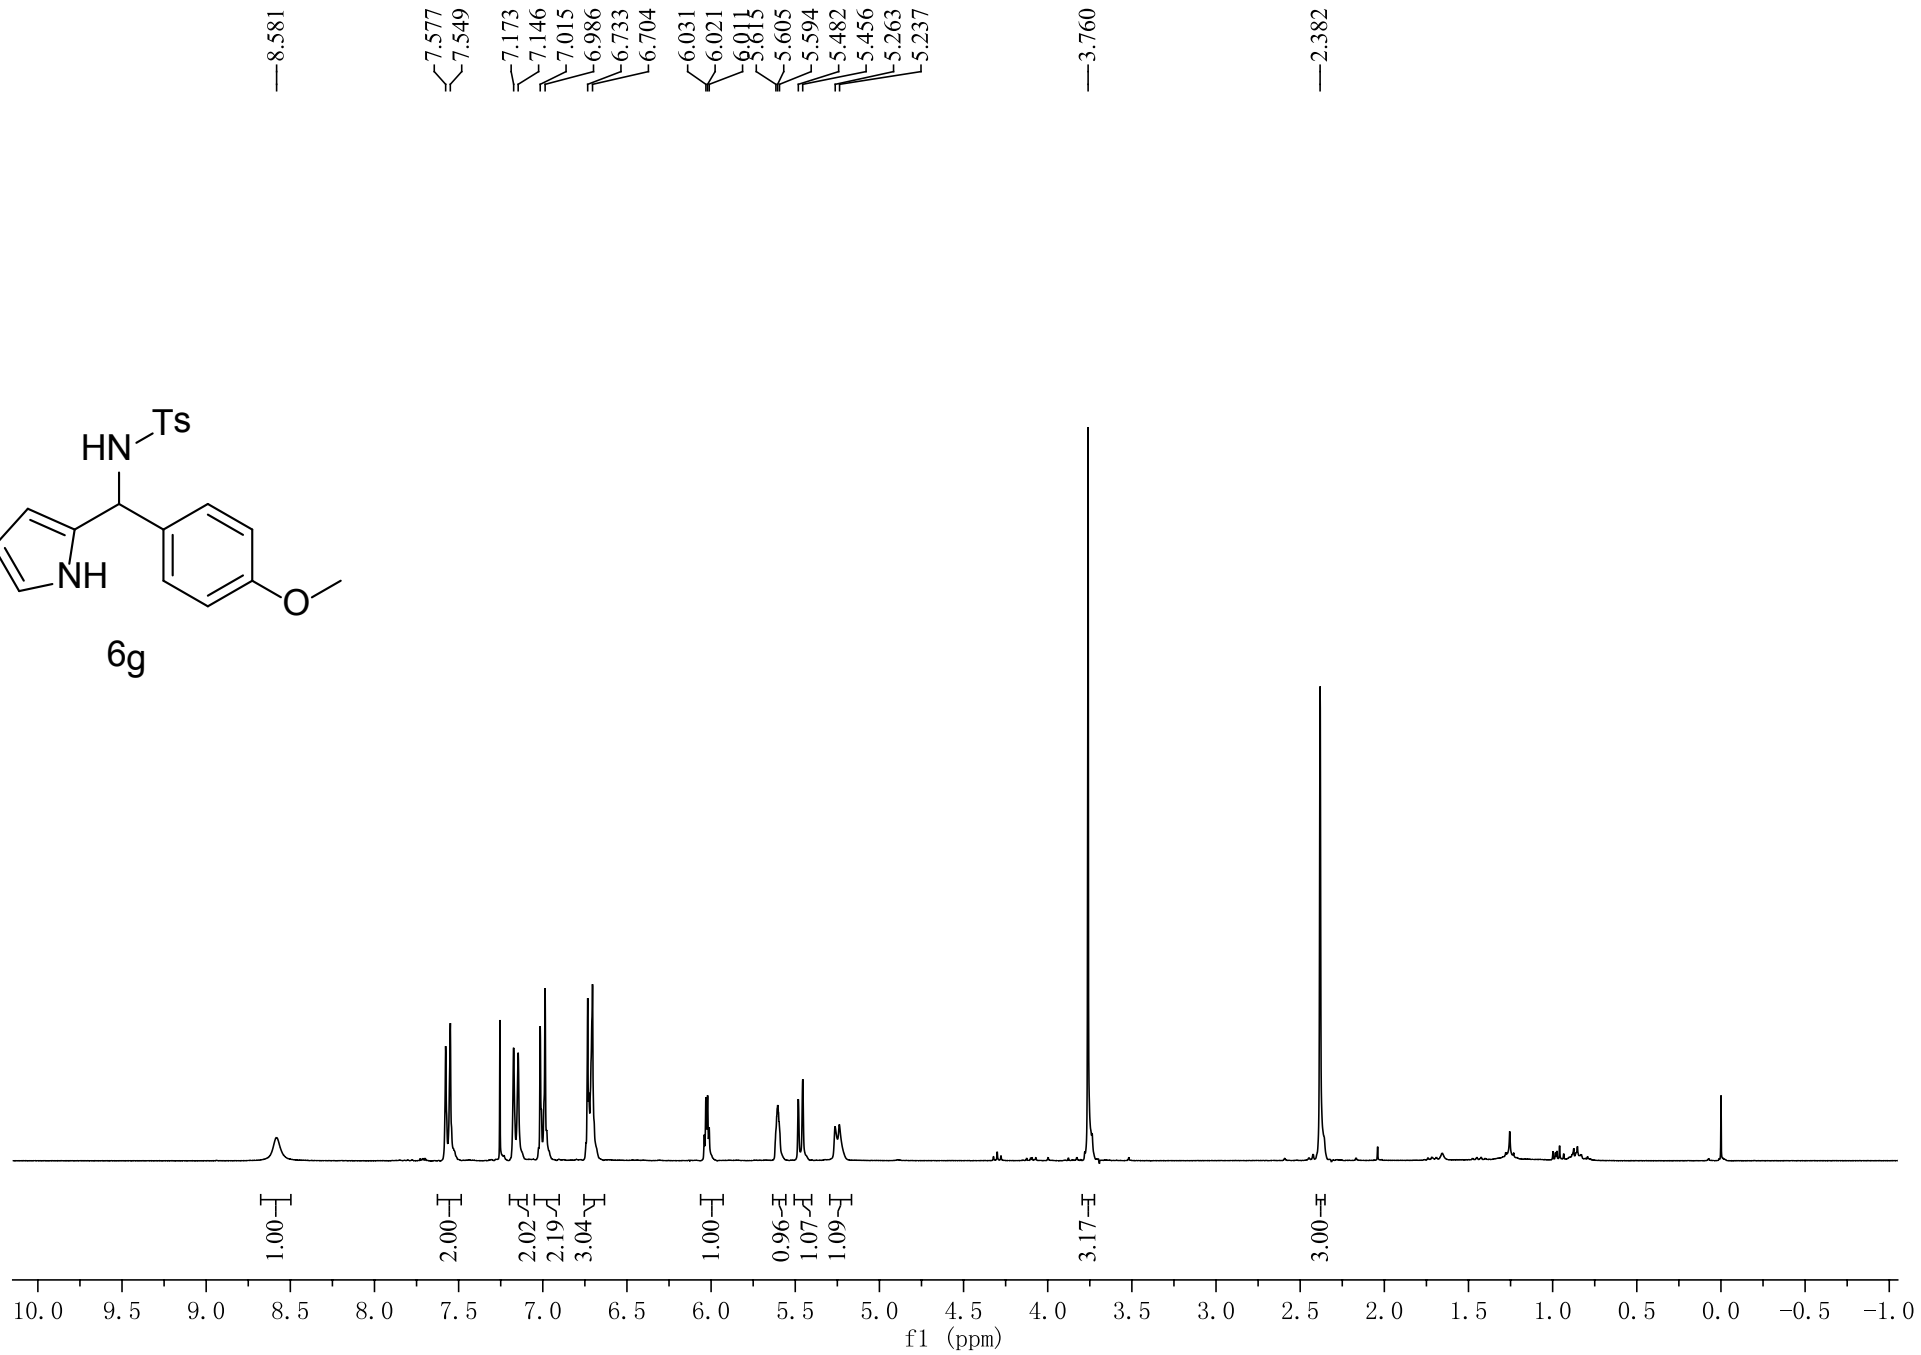

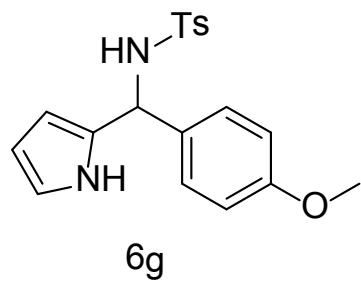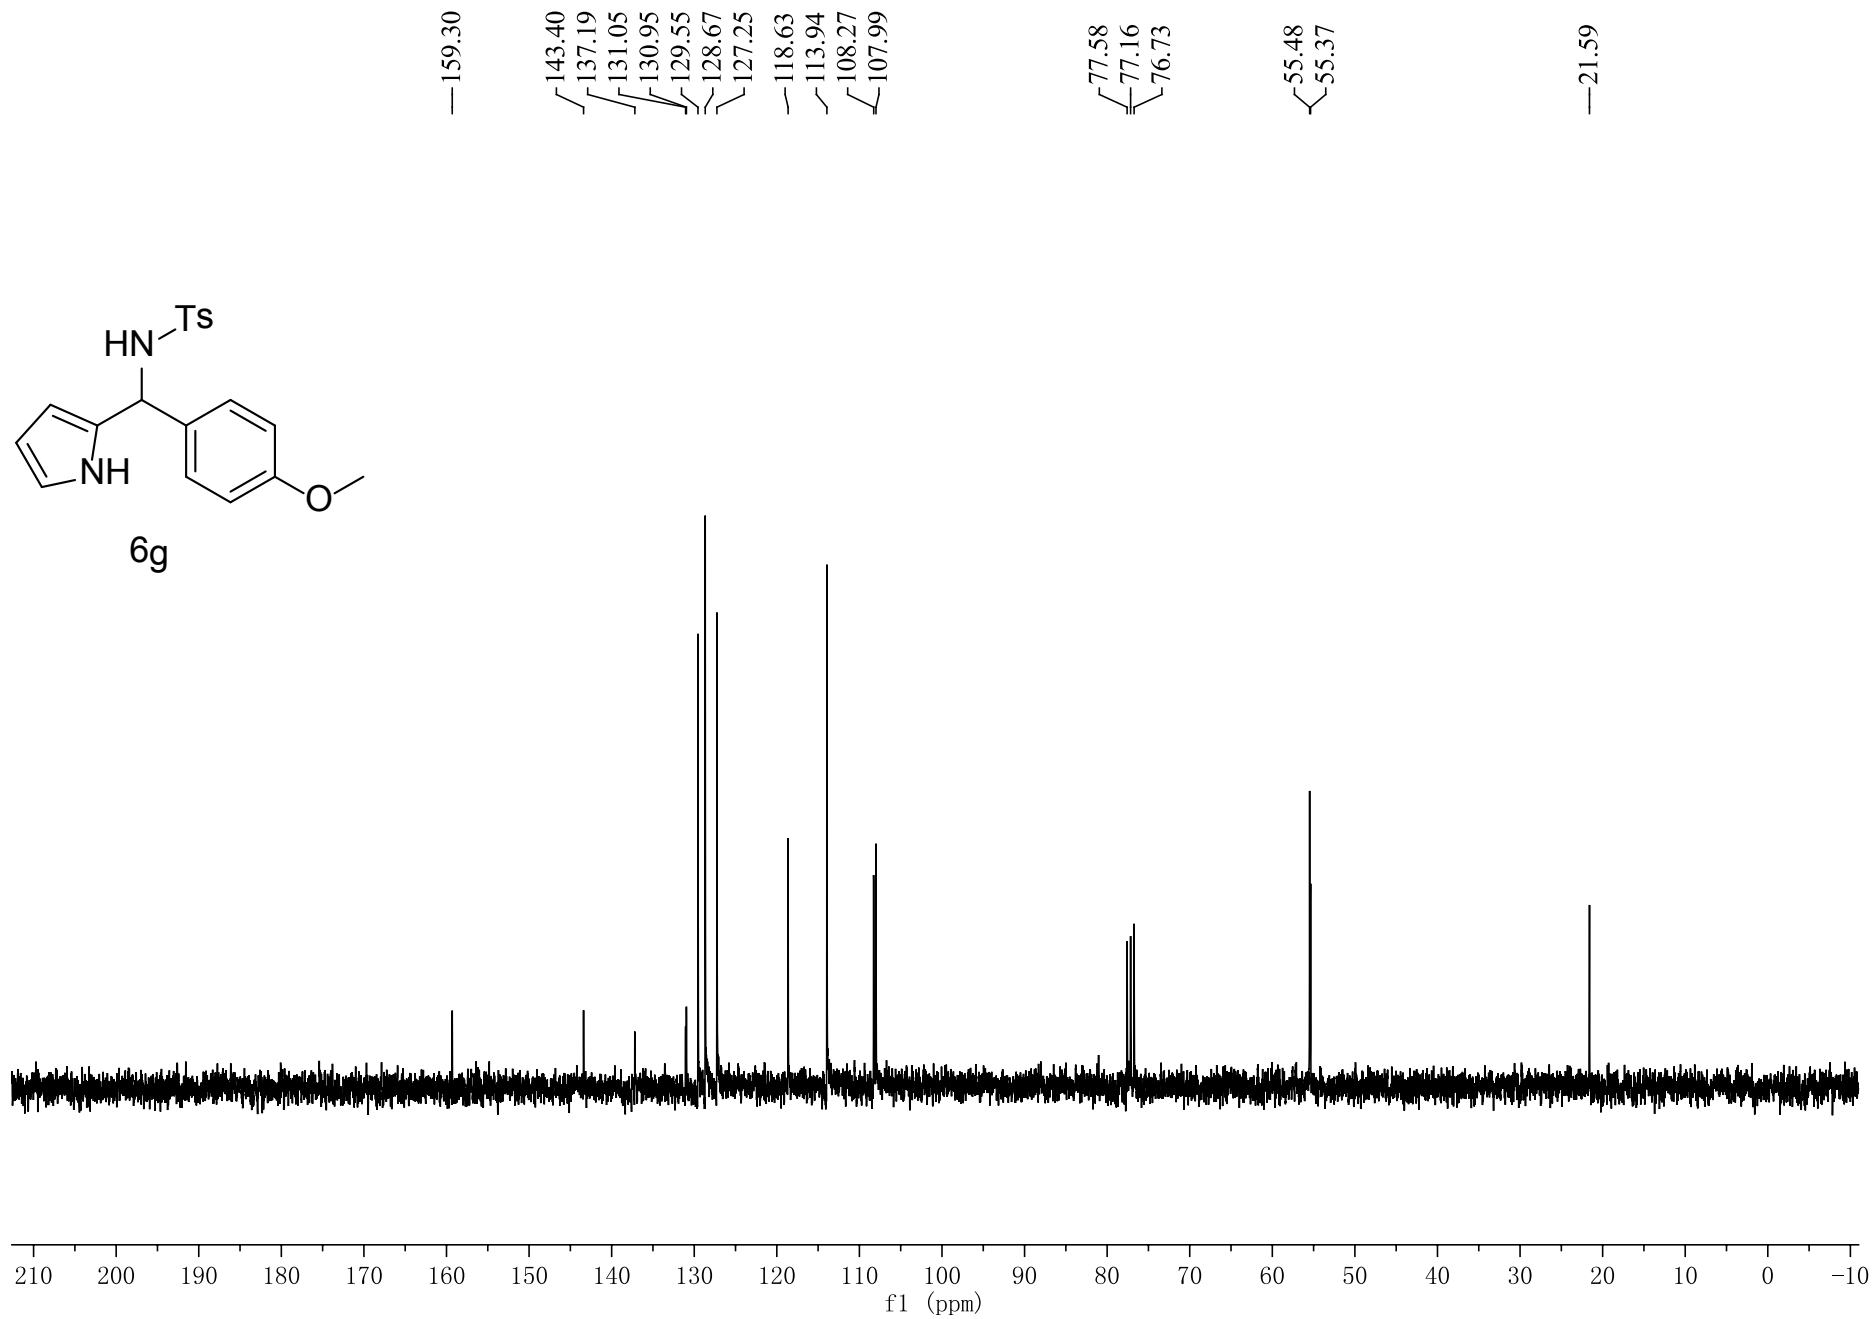

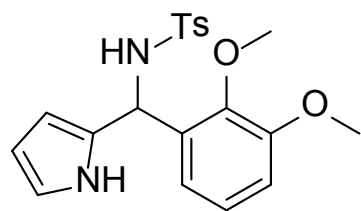

6h

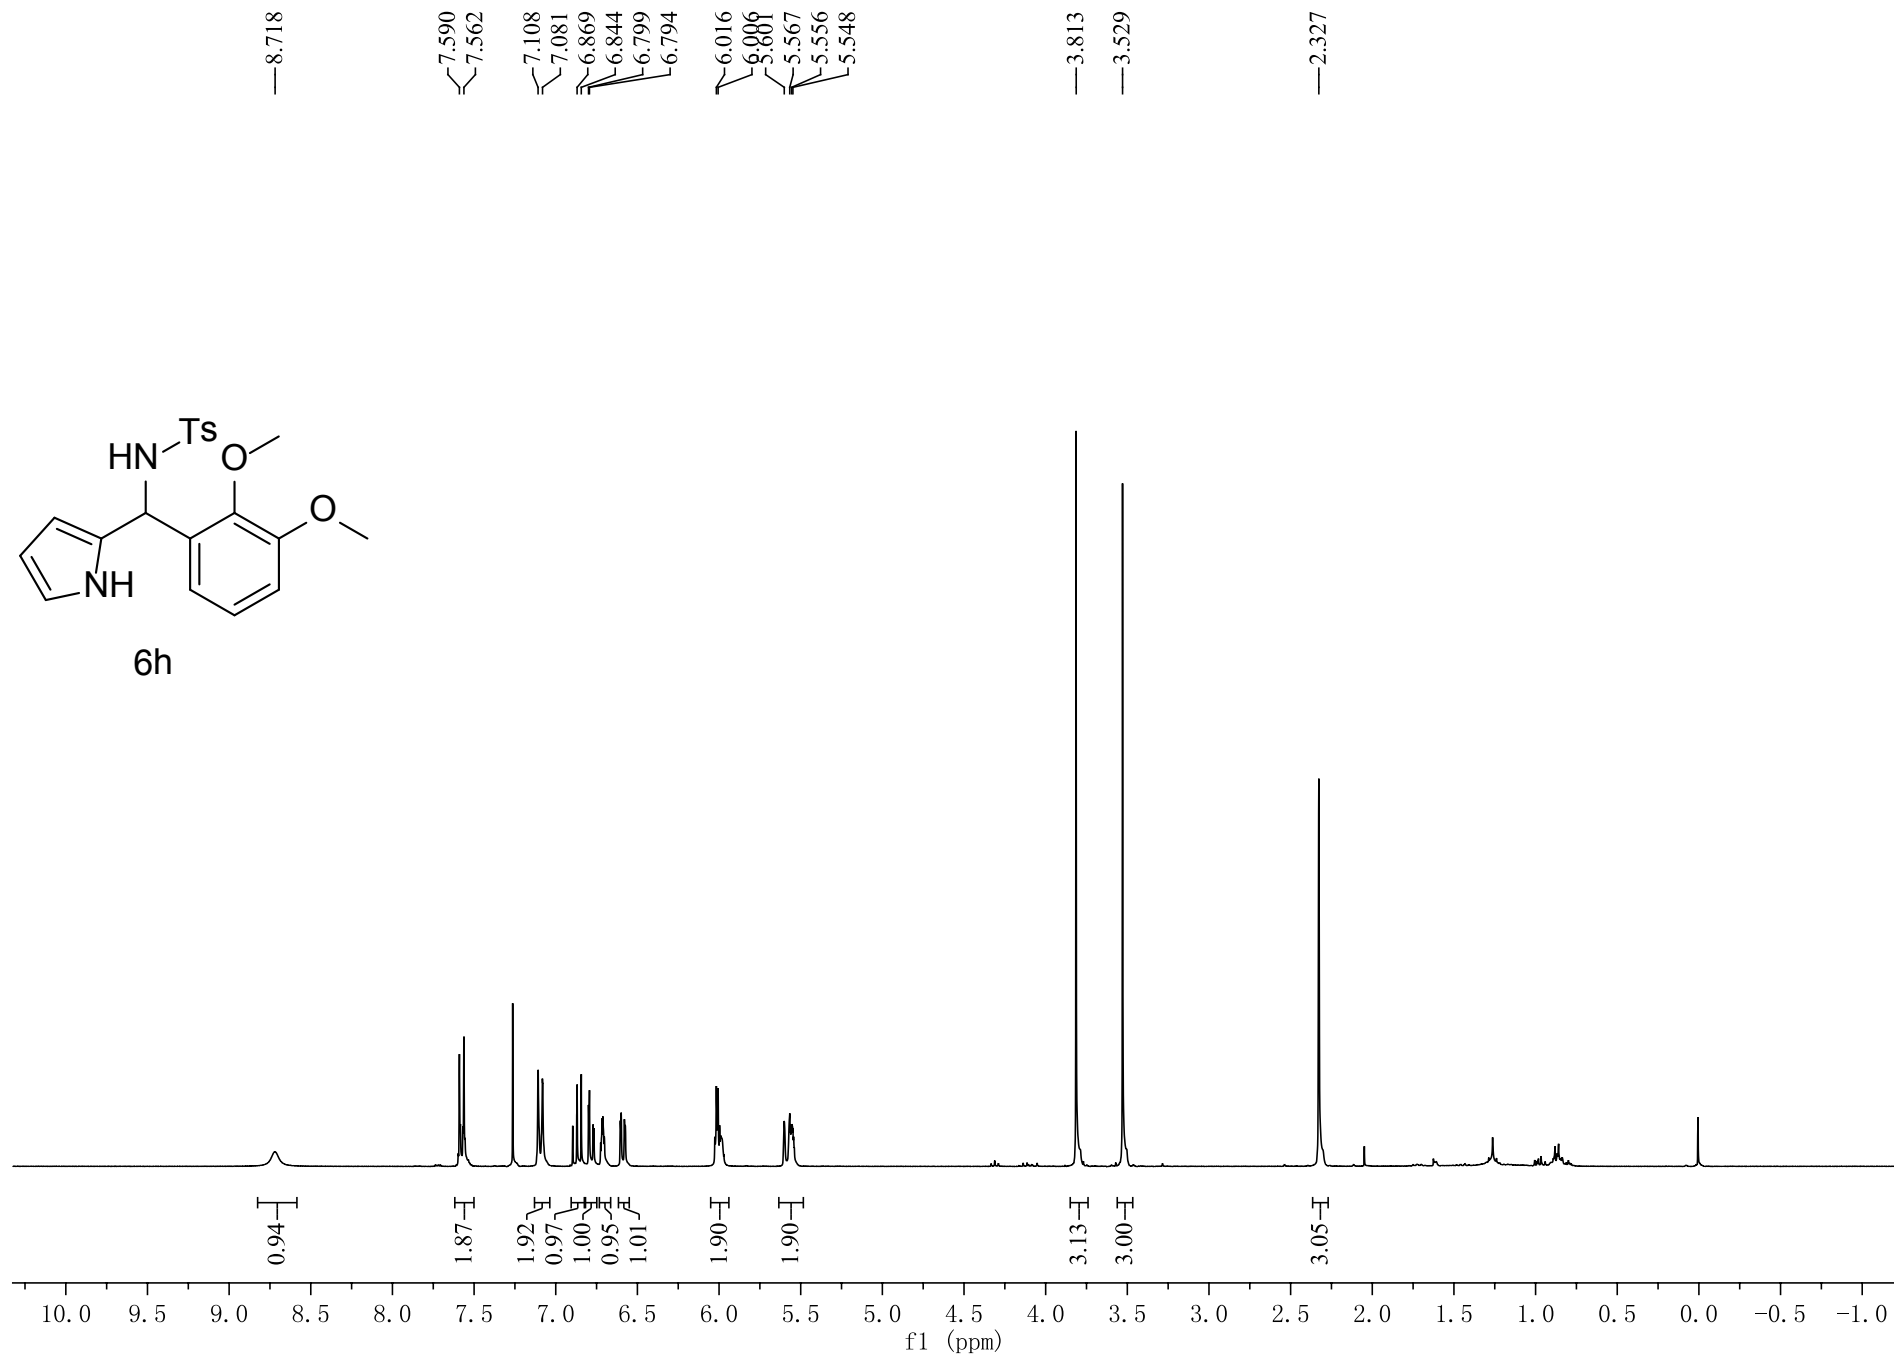

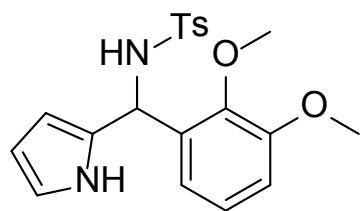

6h

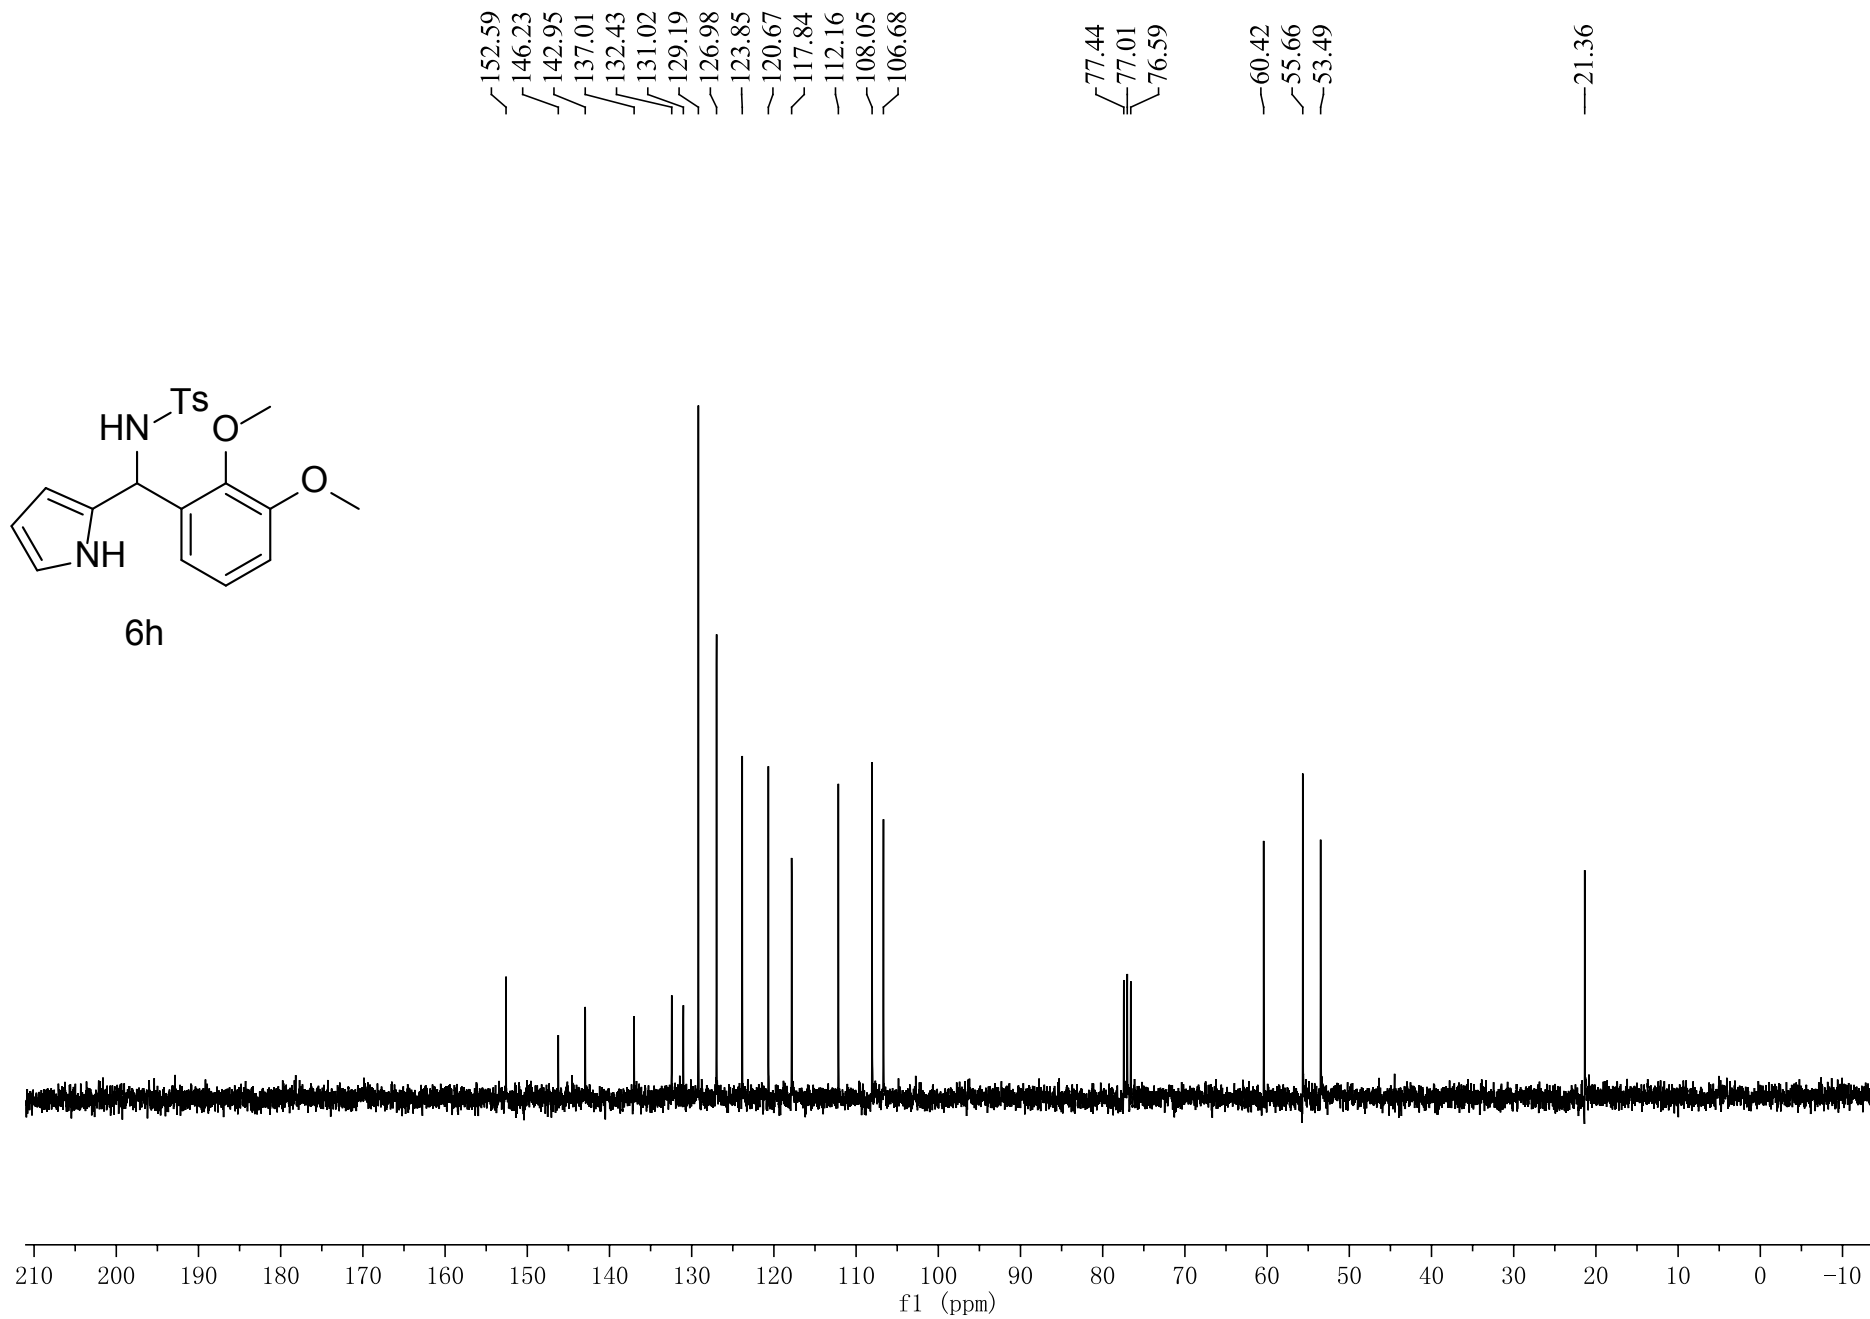

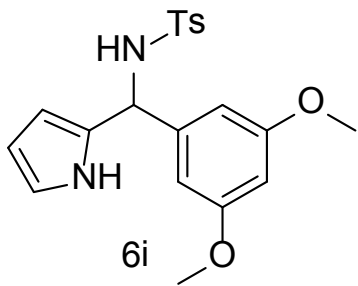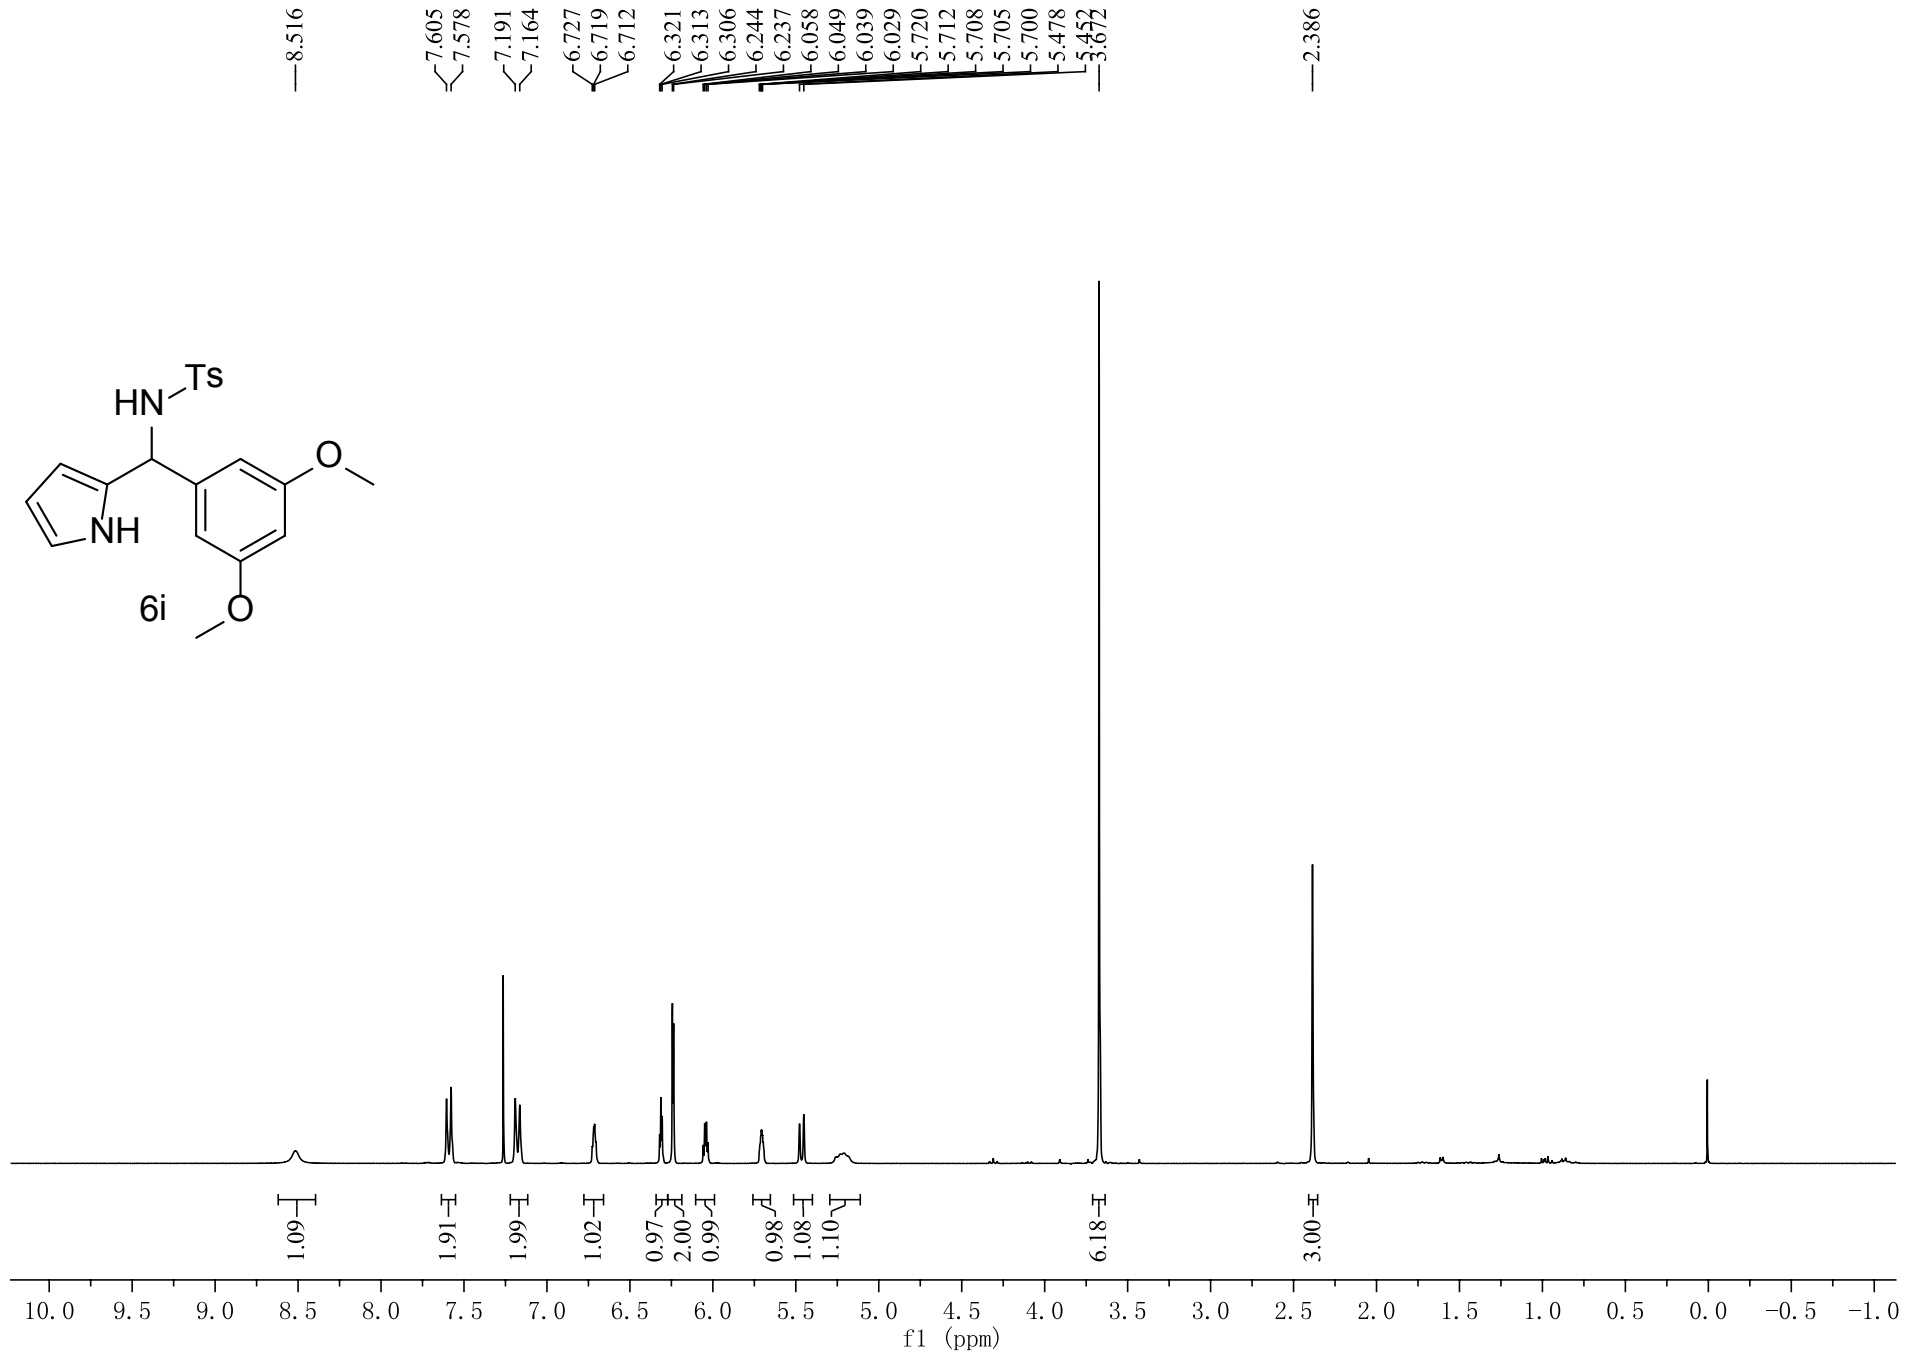

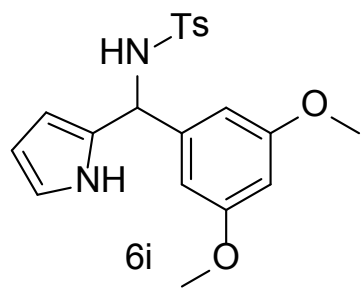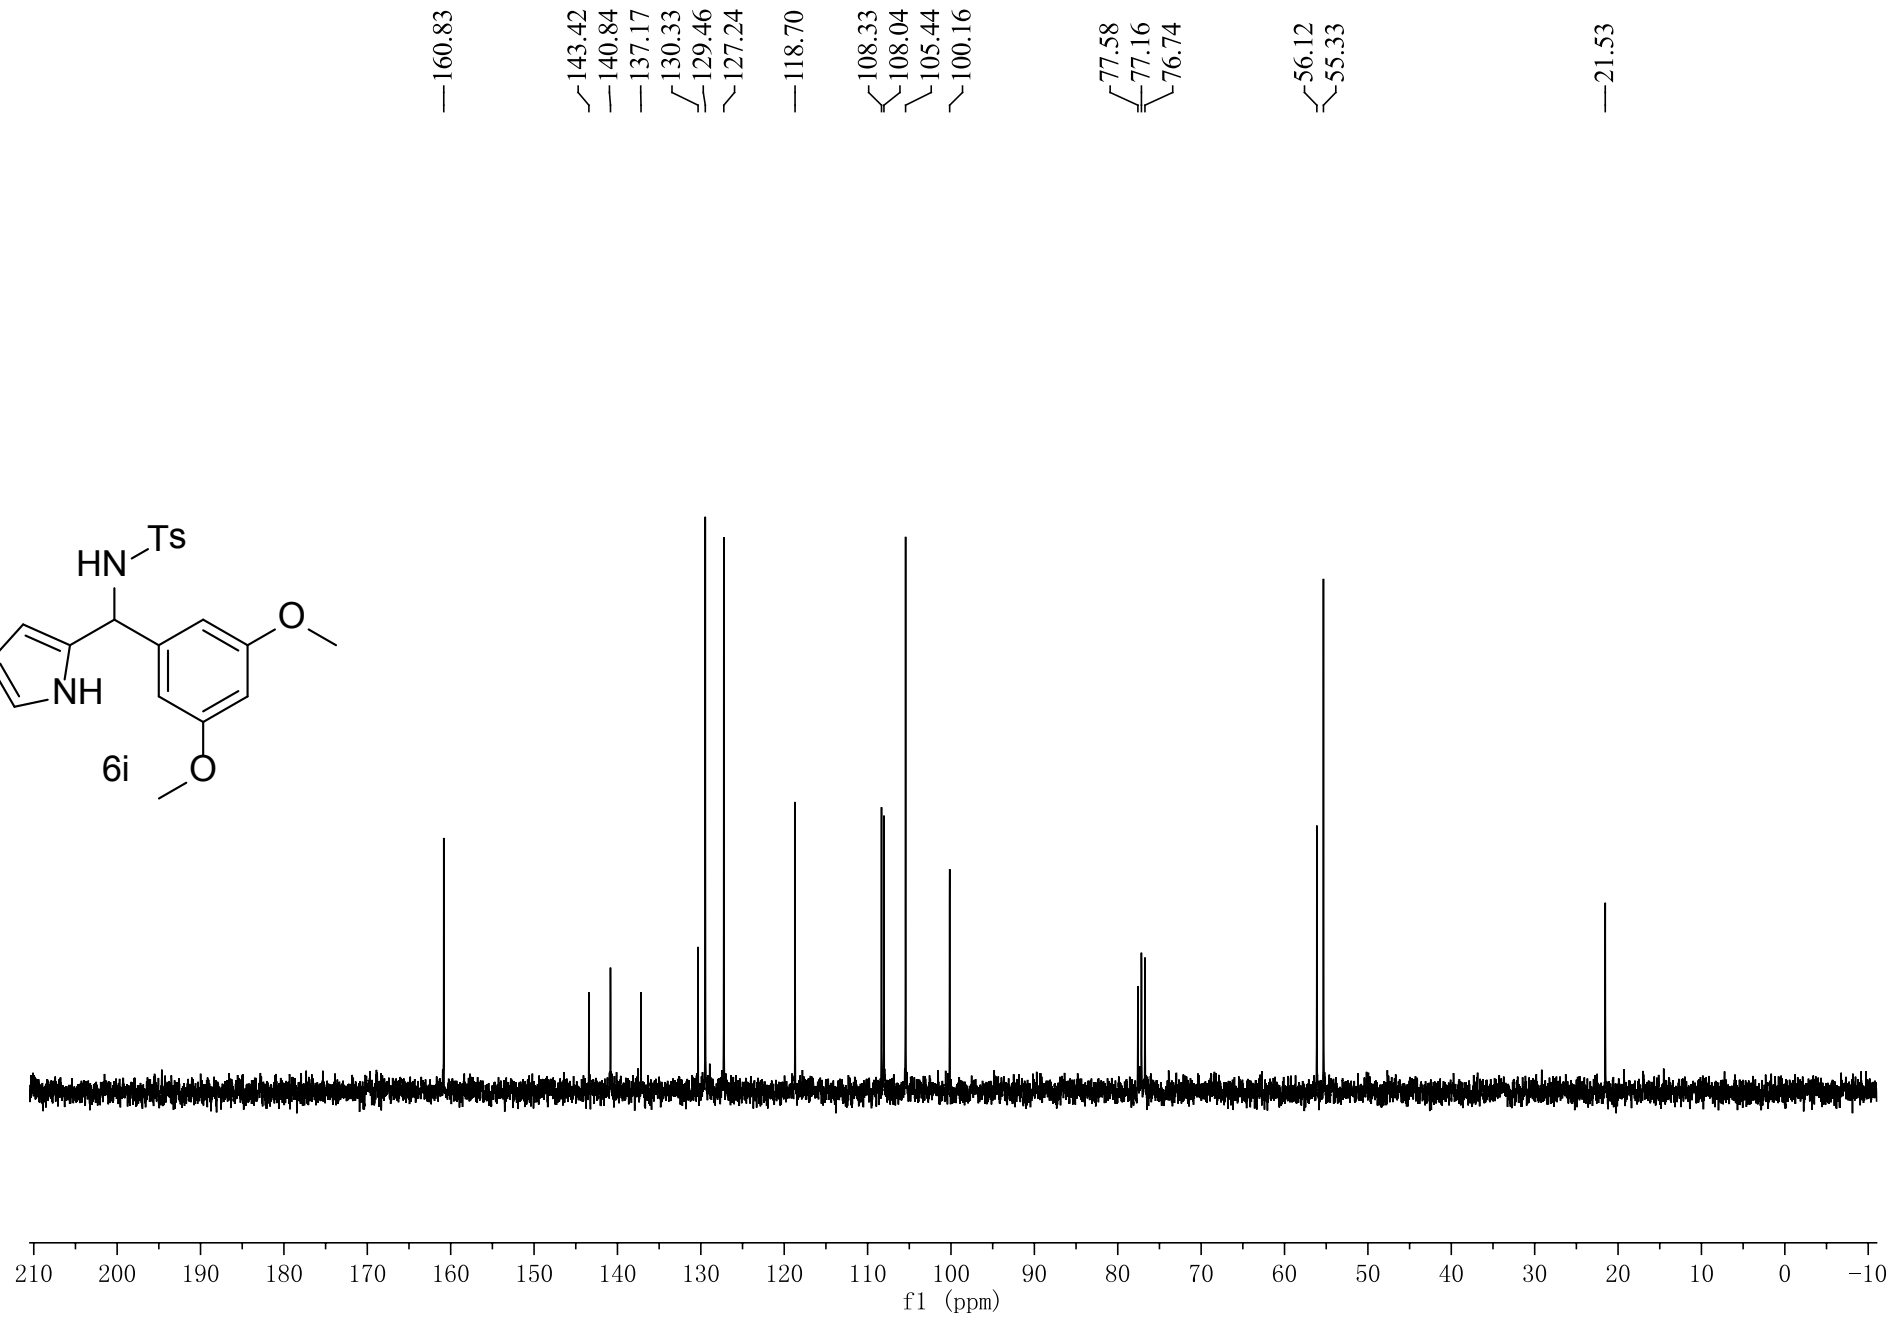

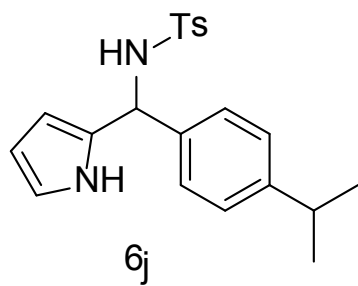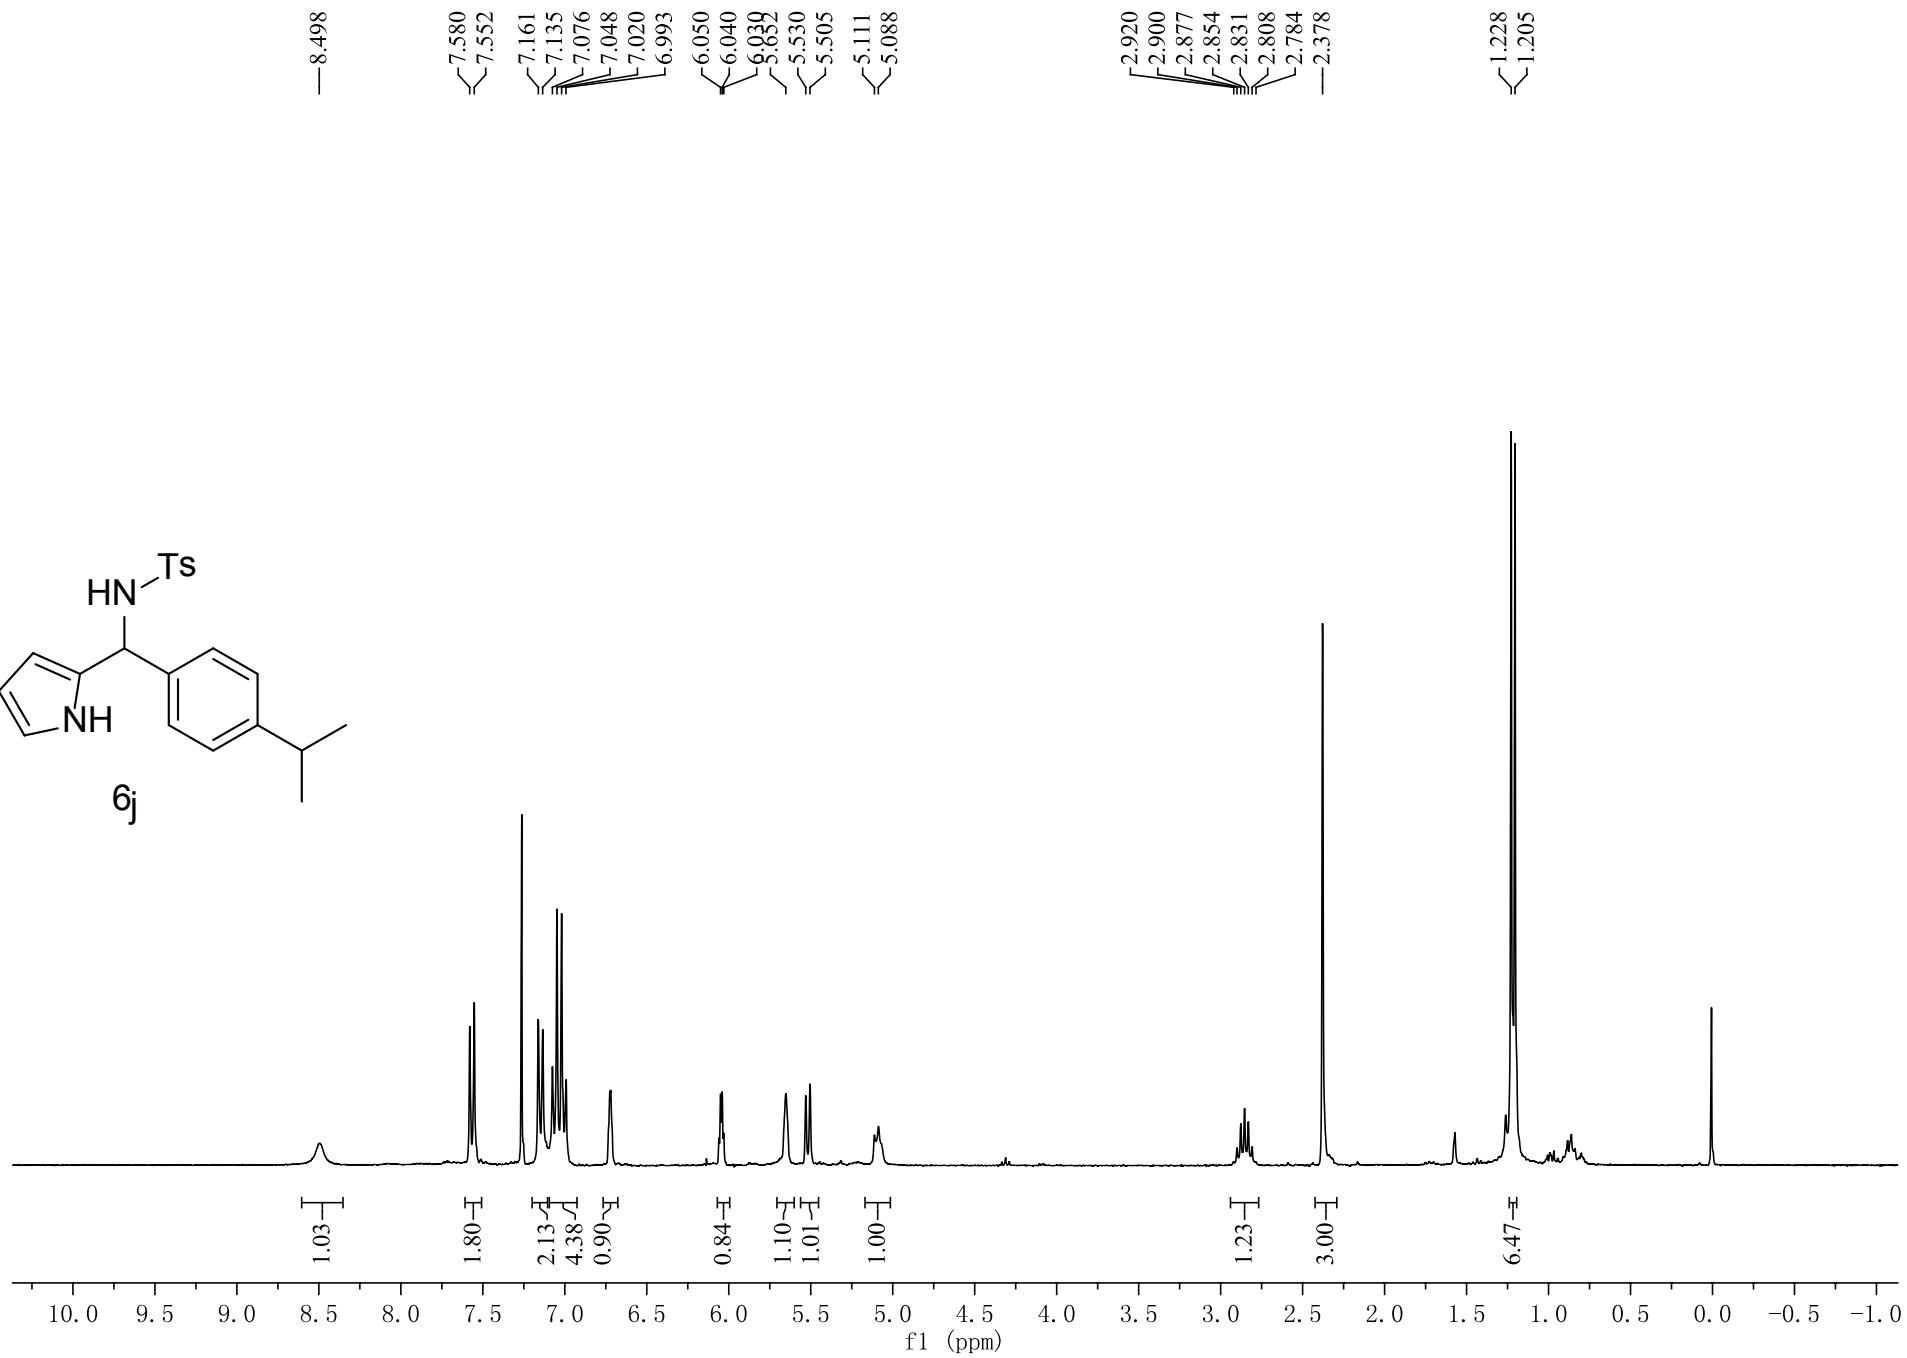



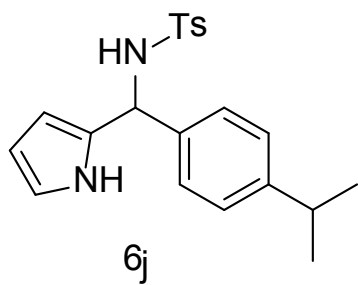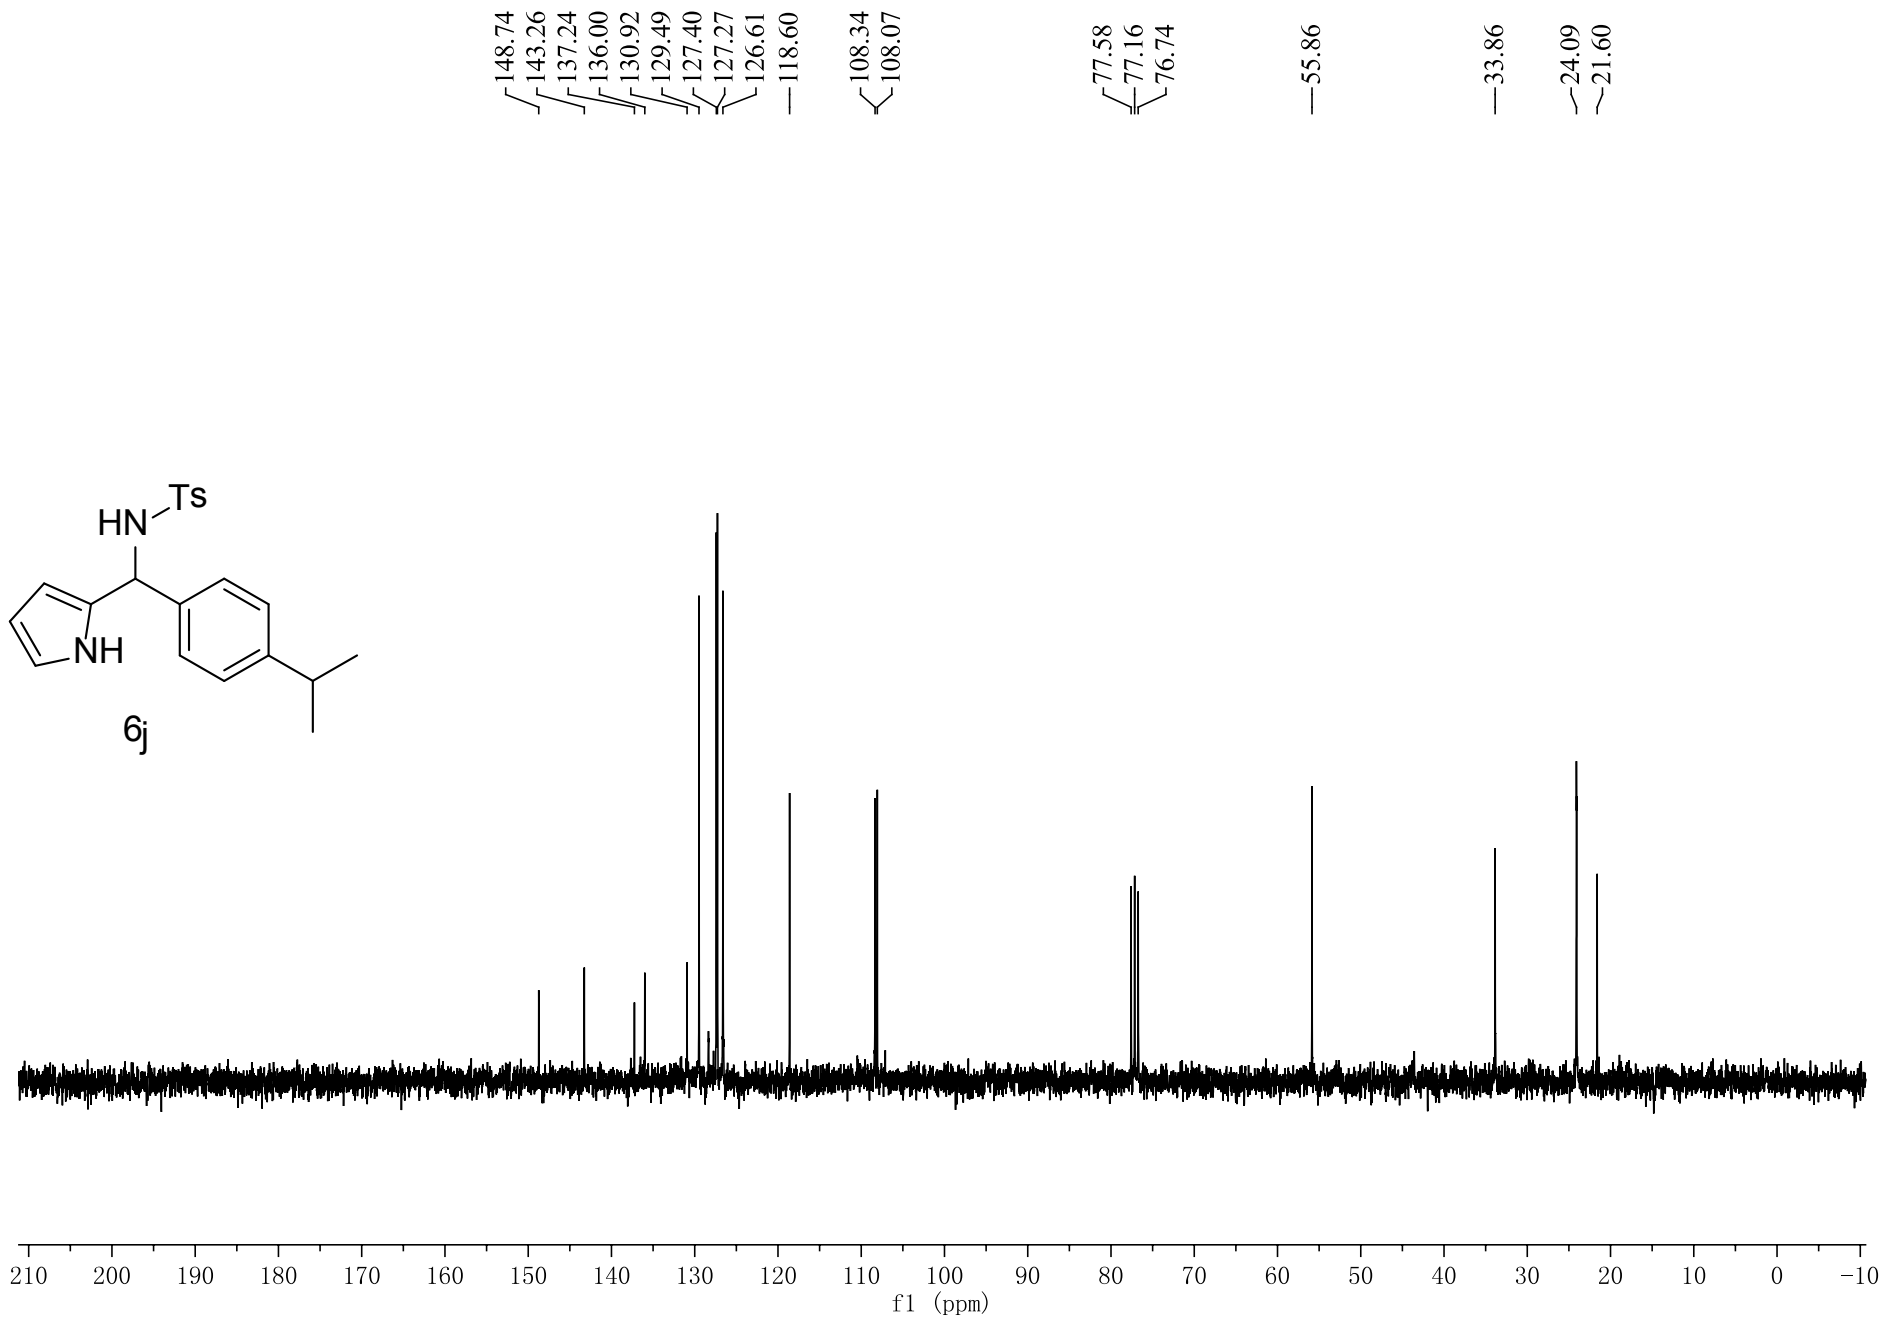

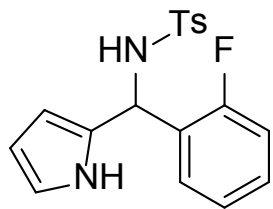

6k

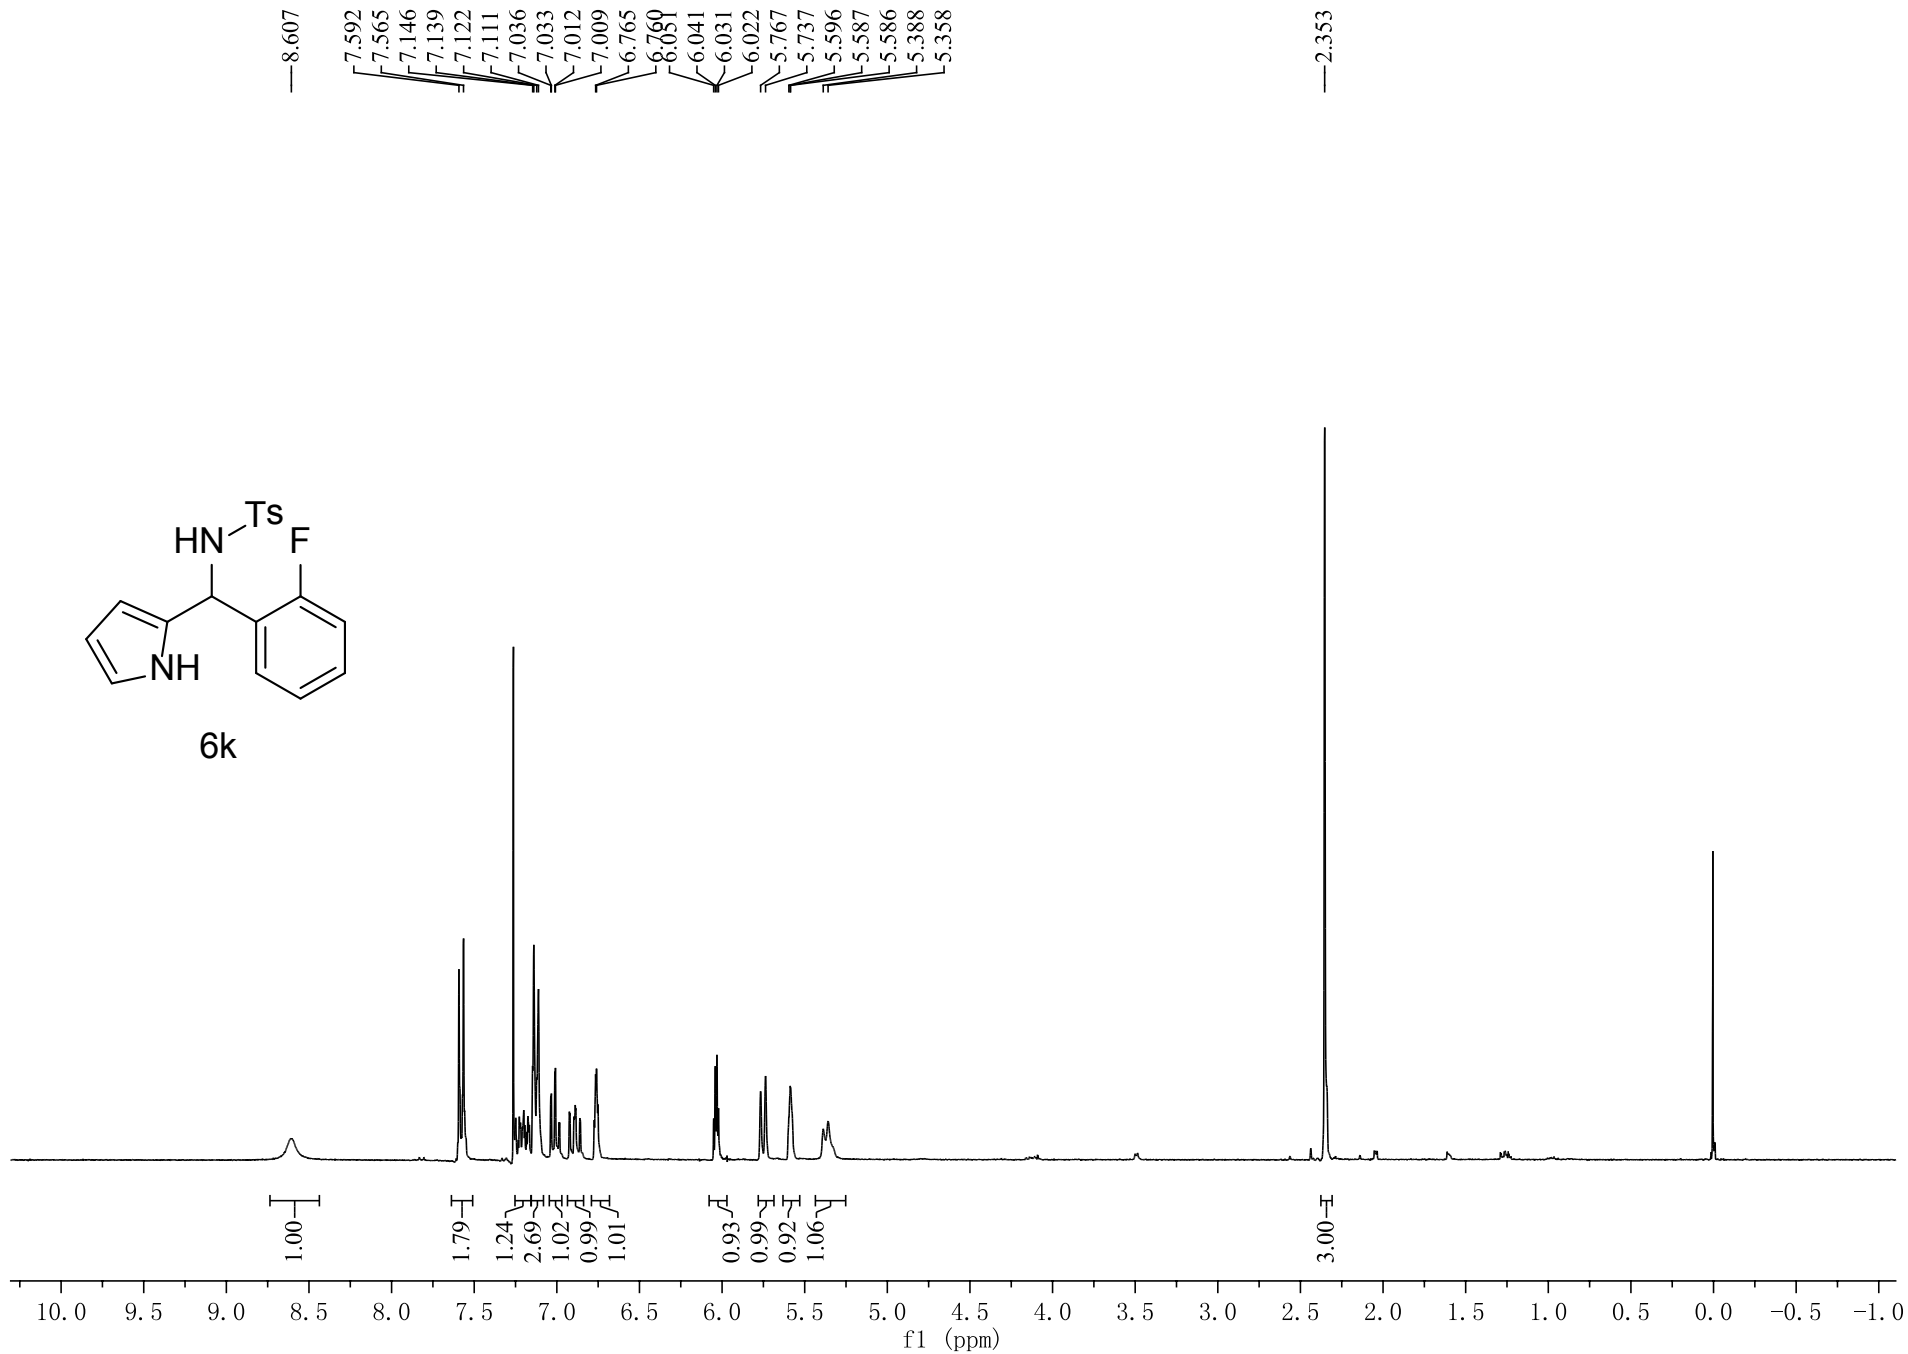

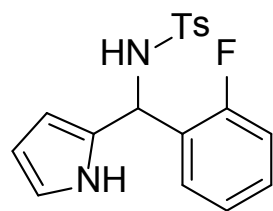

6k

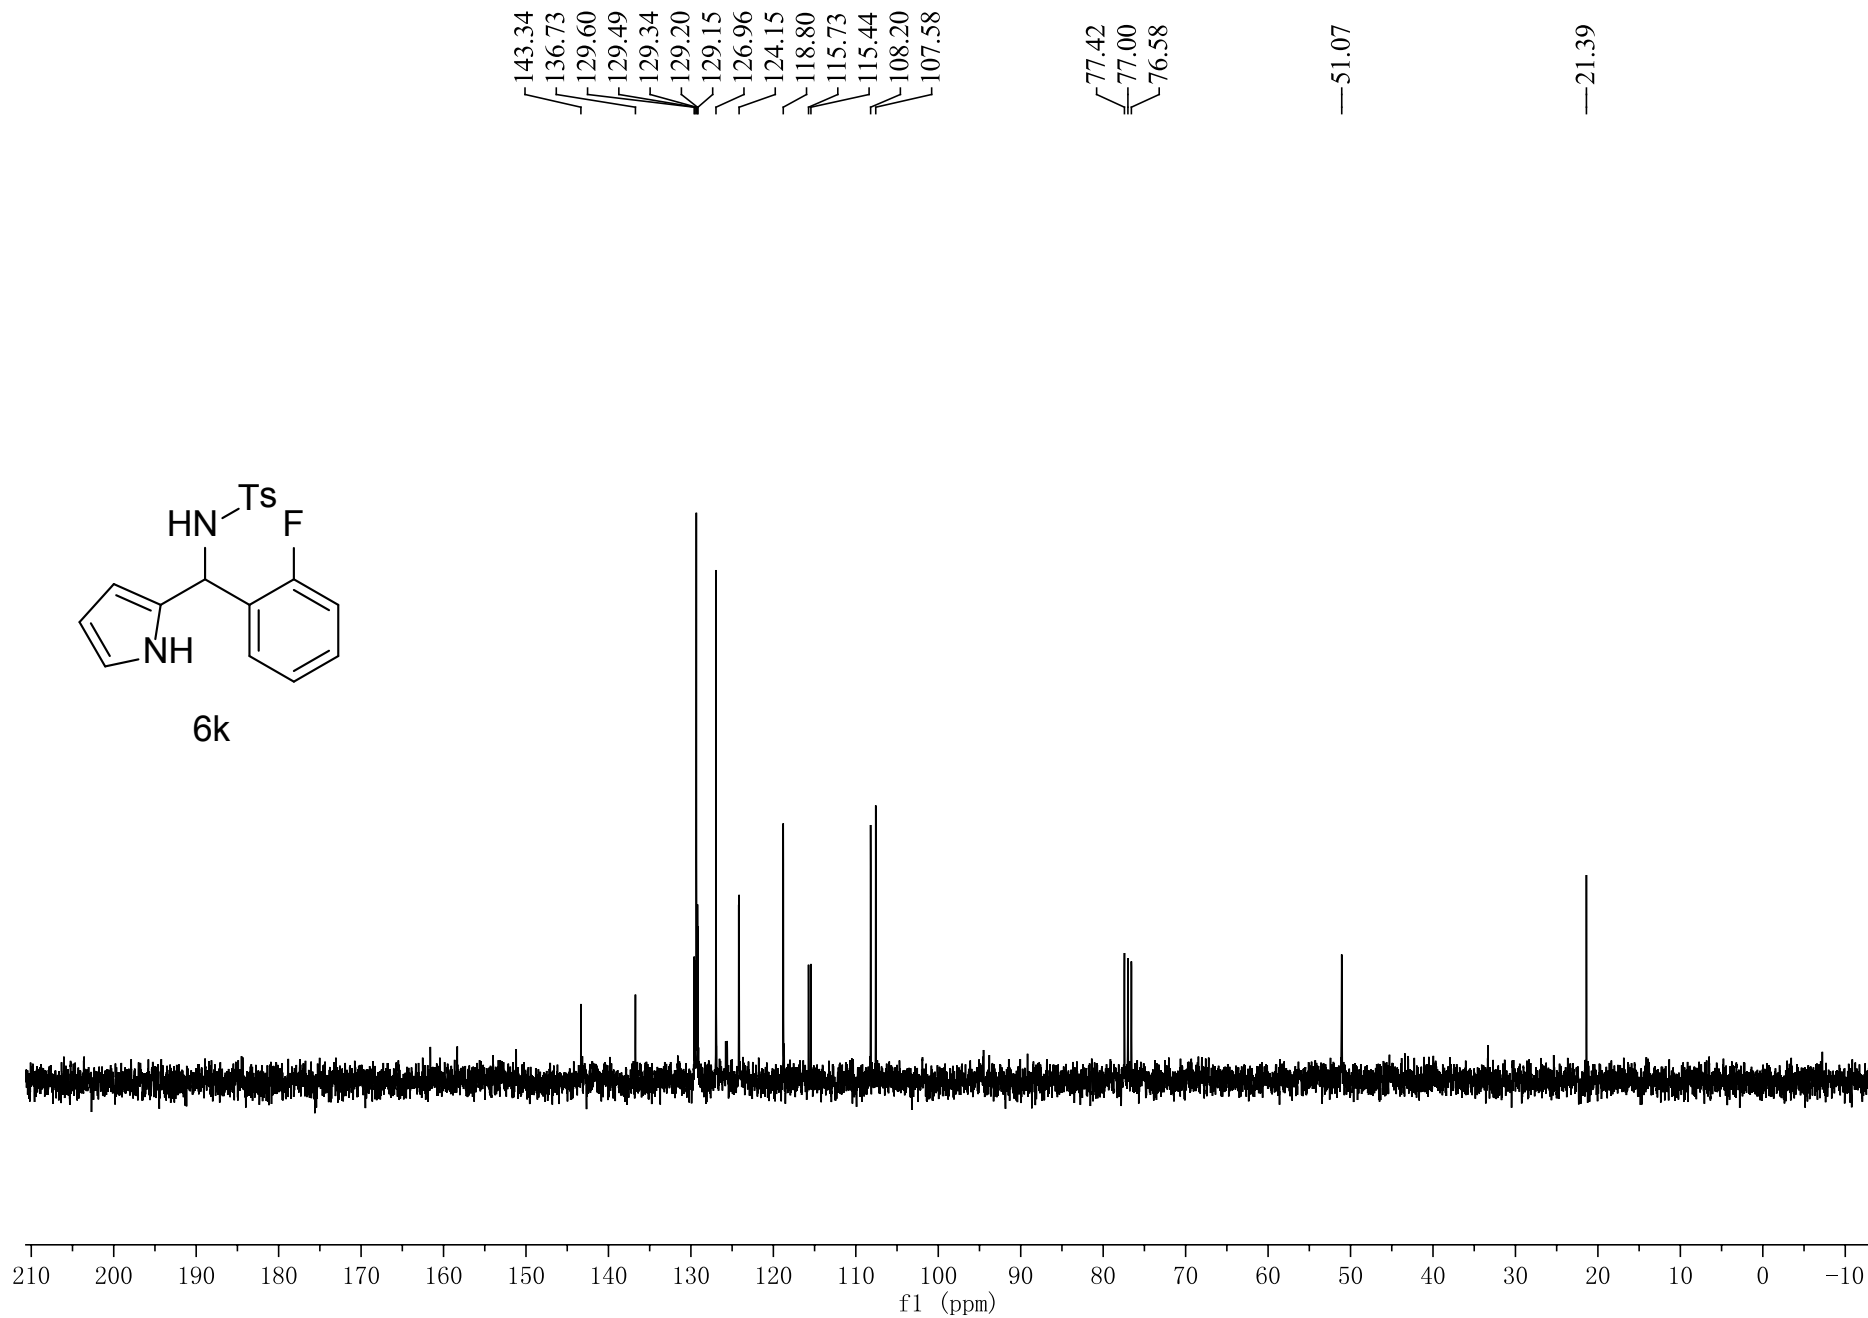

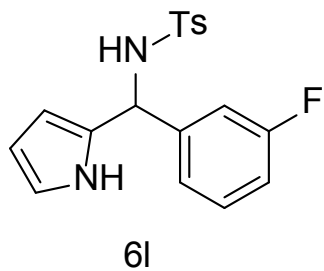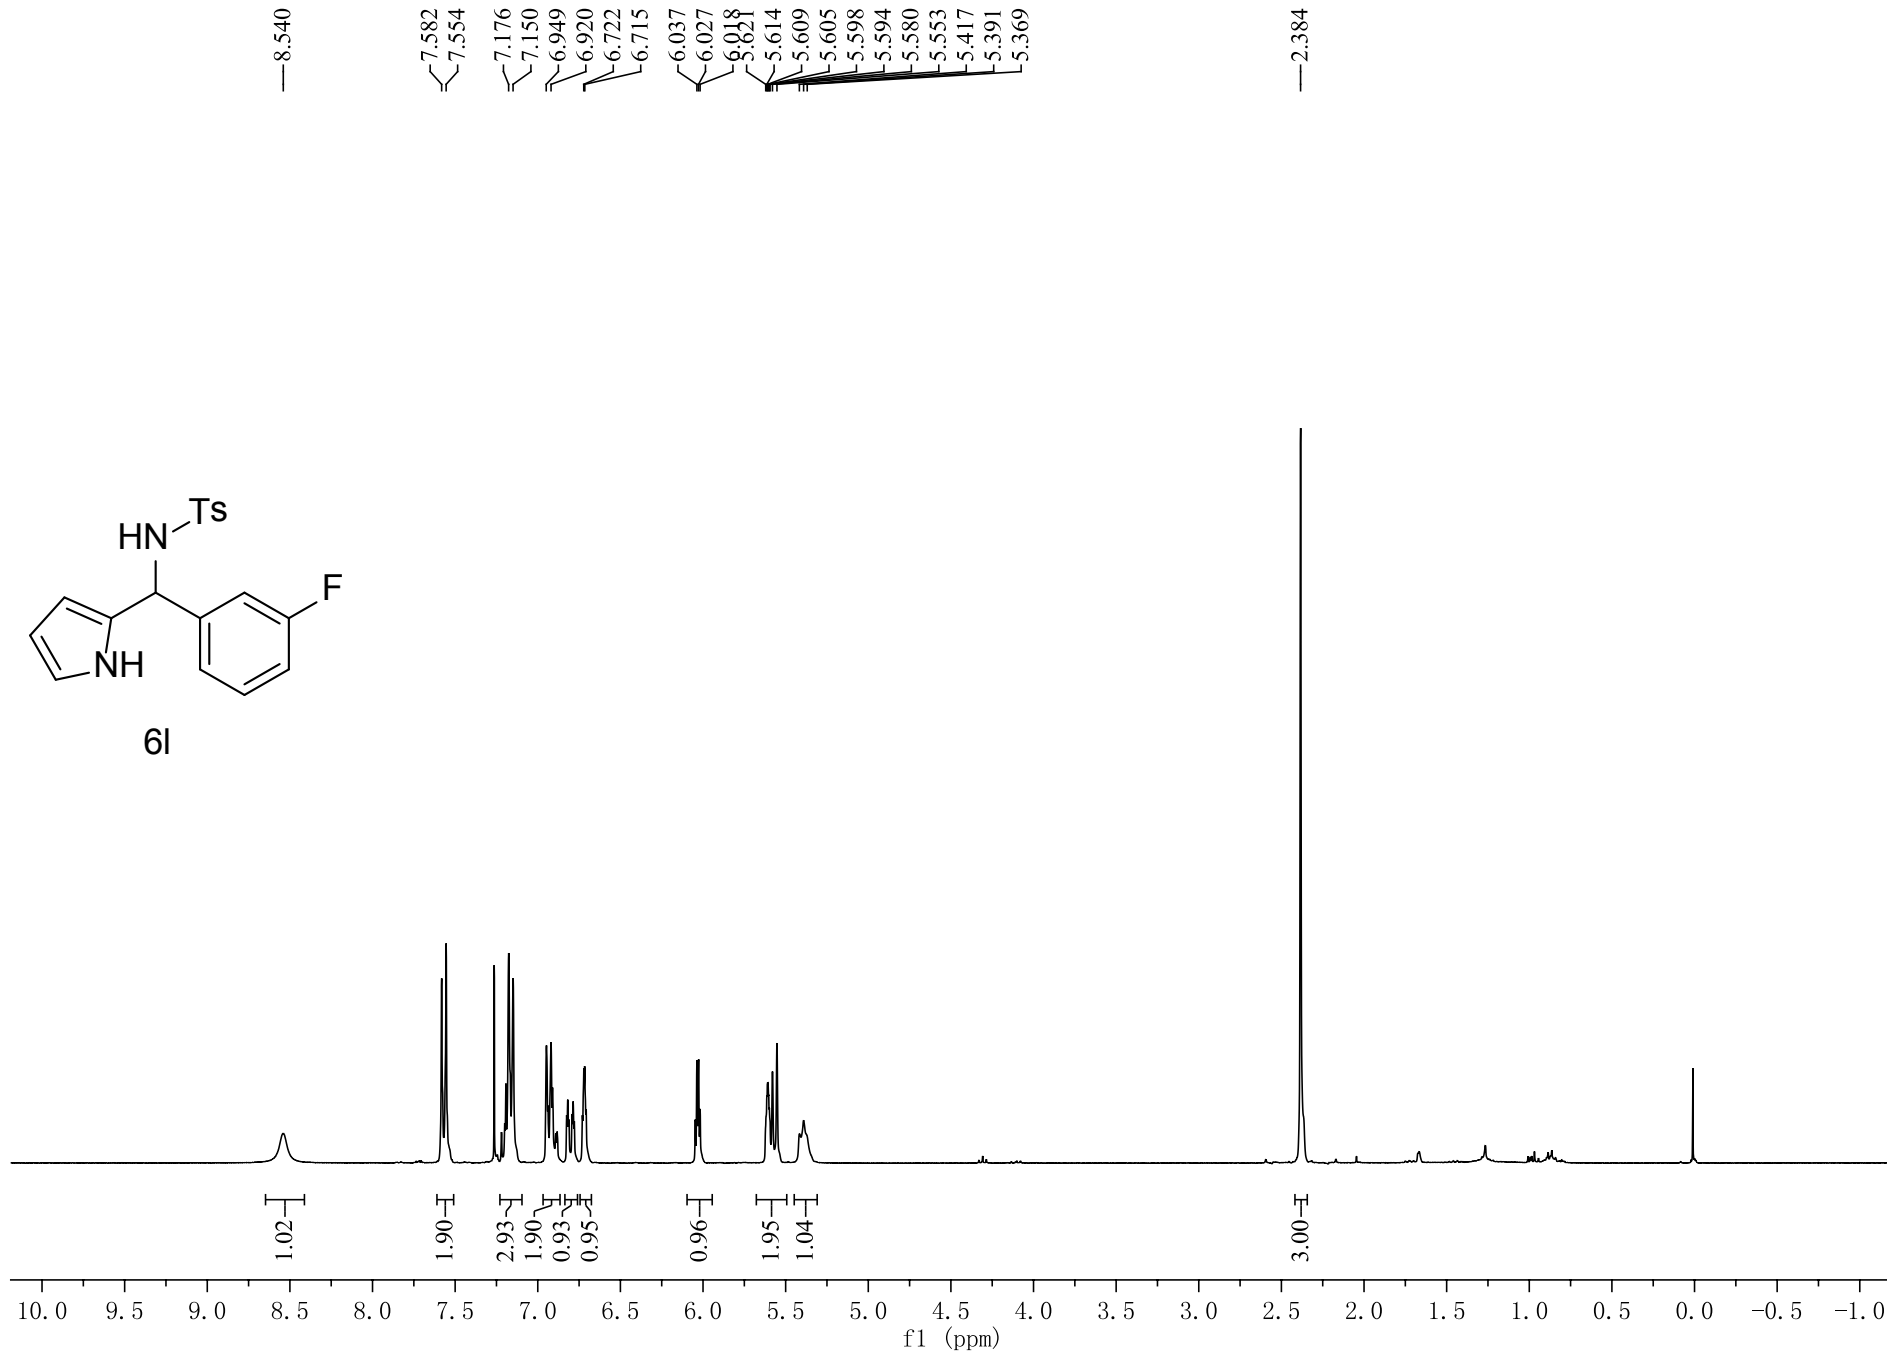

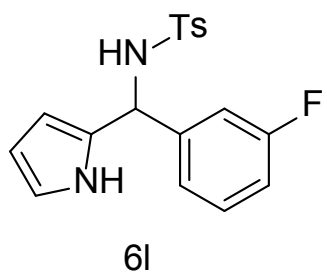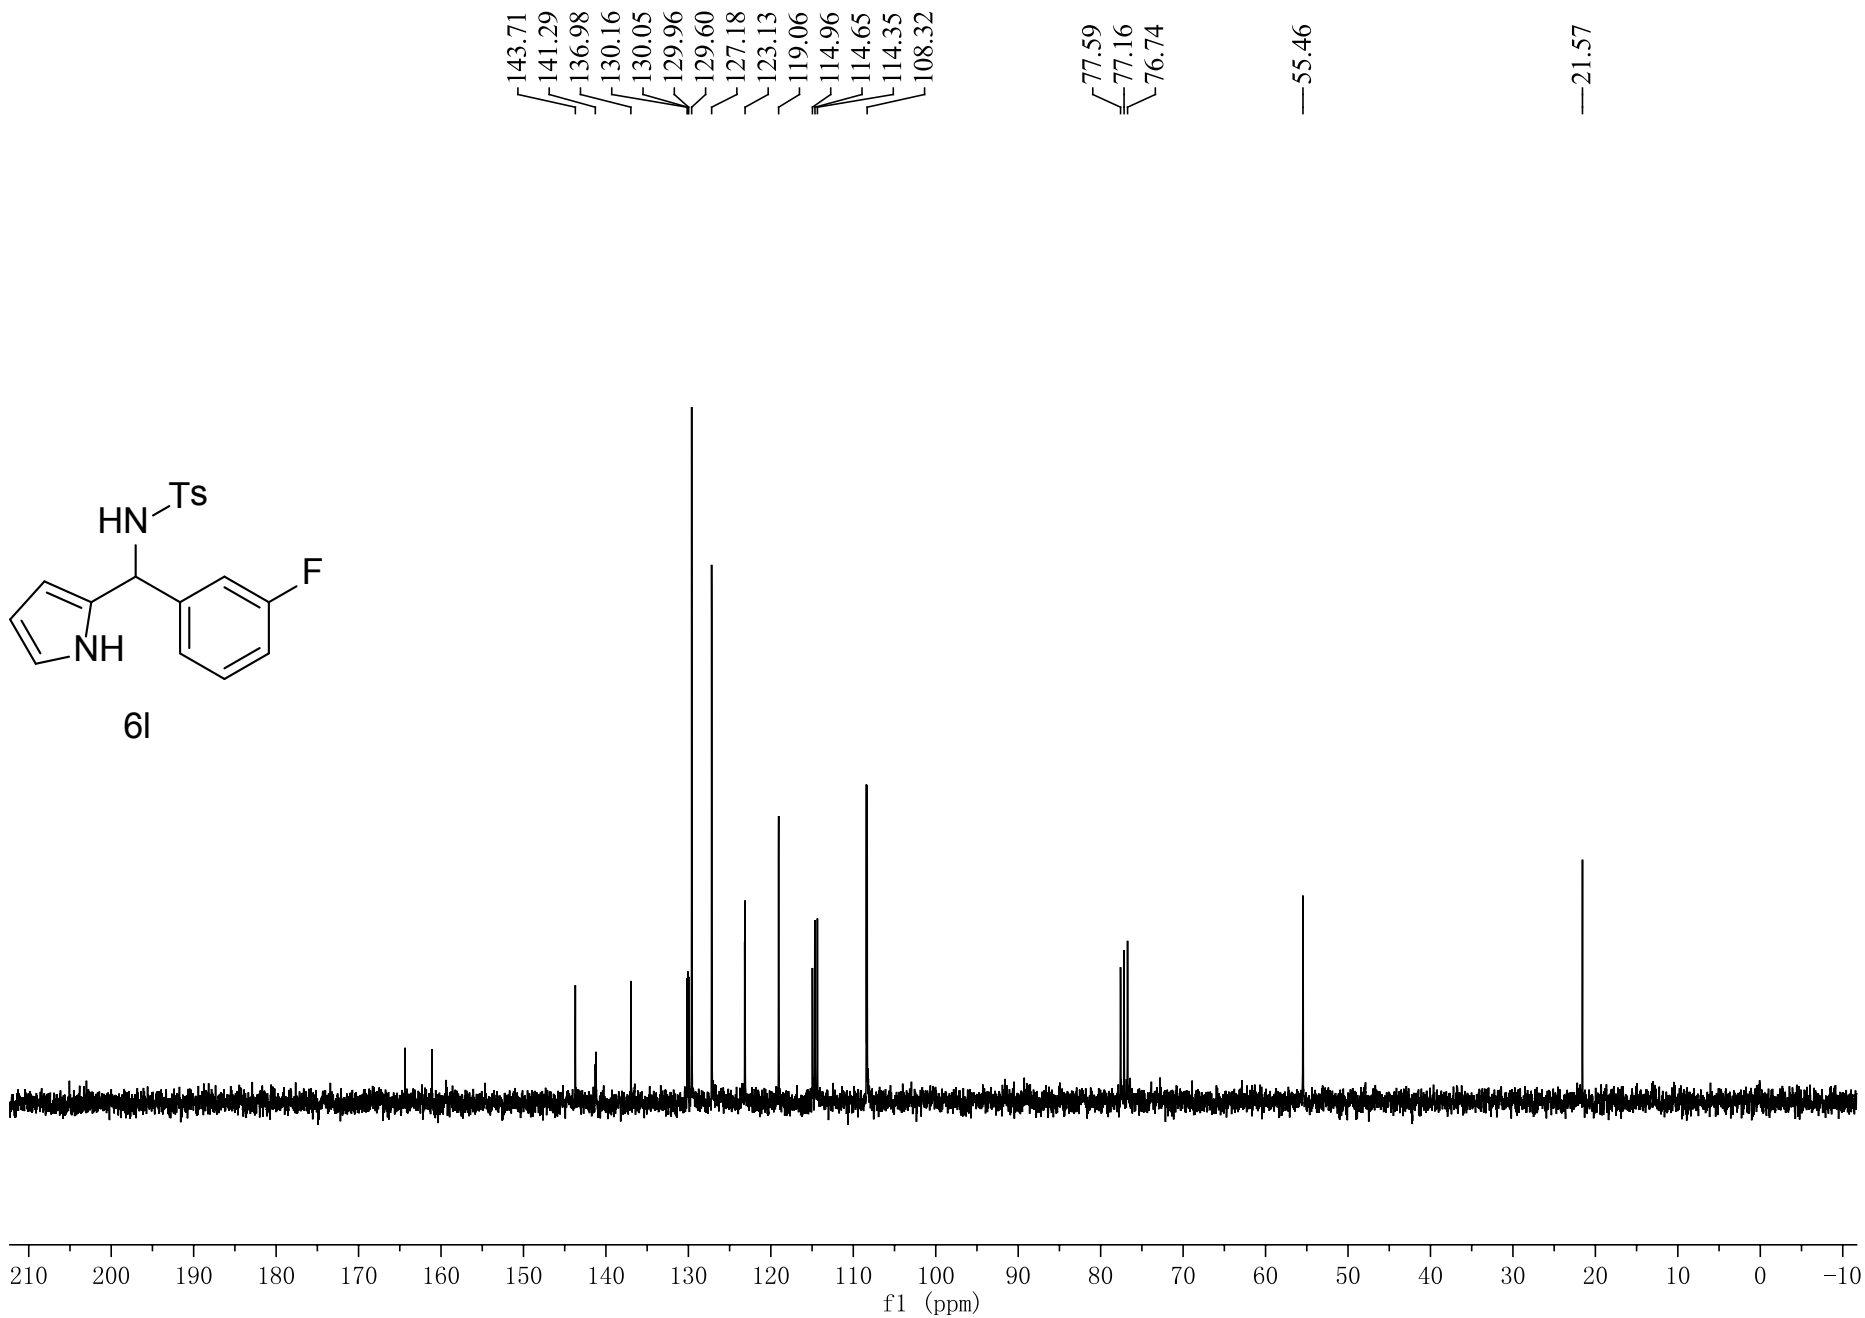

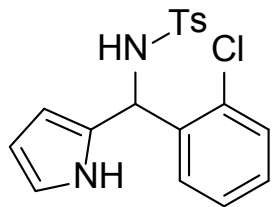

6m

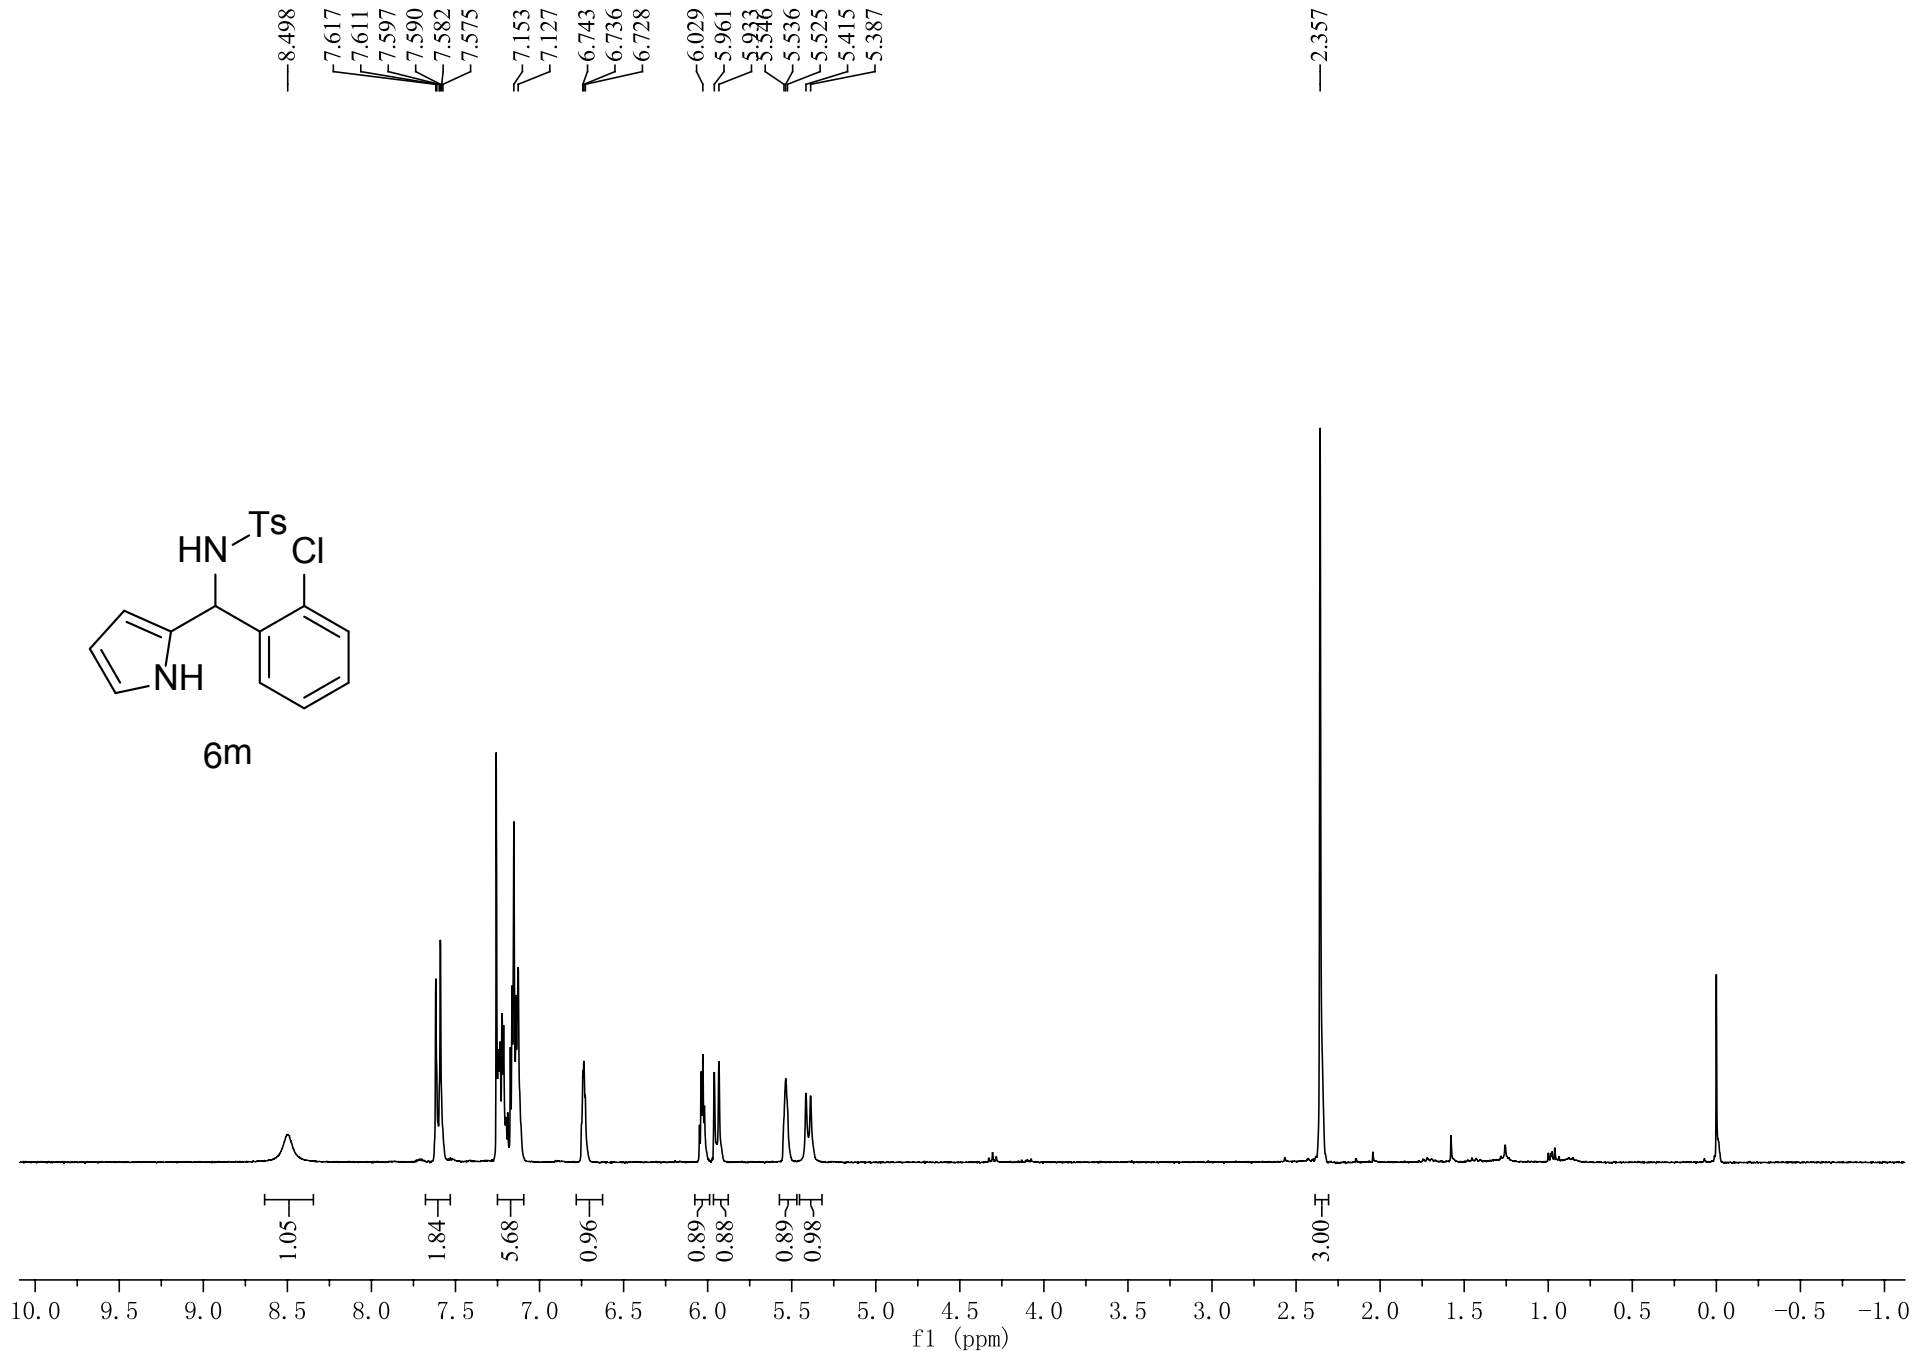

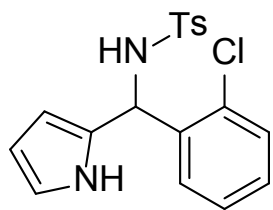

6m

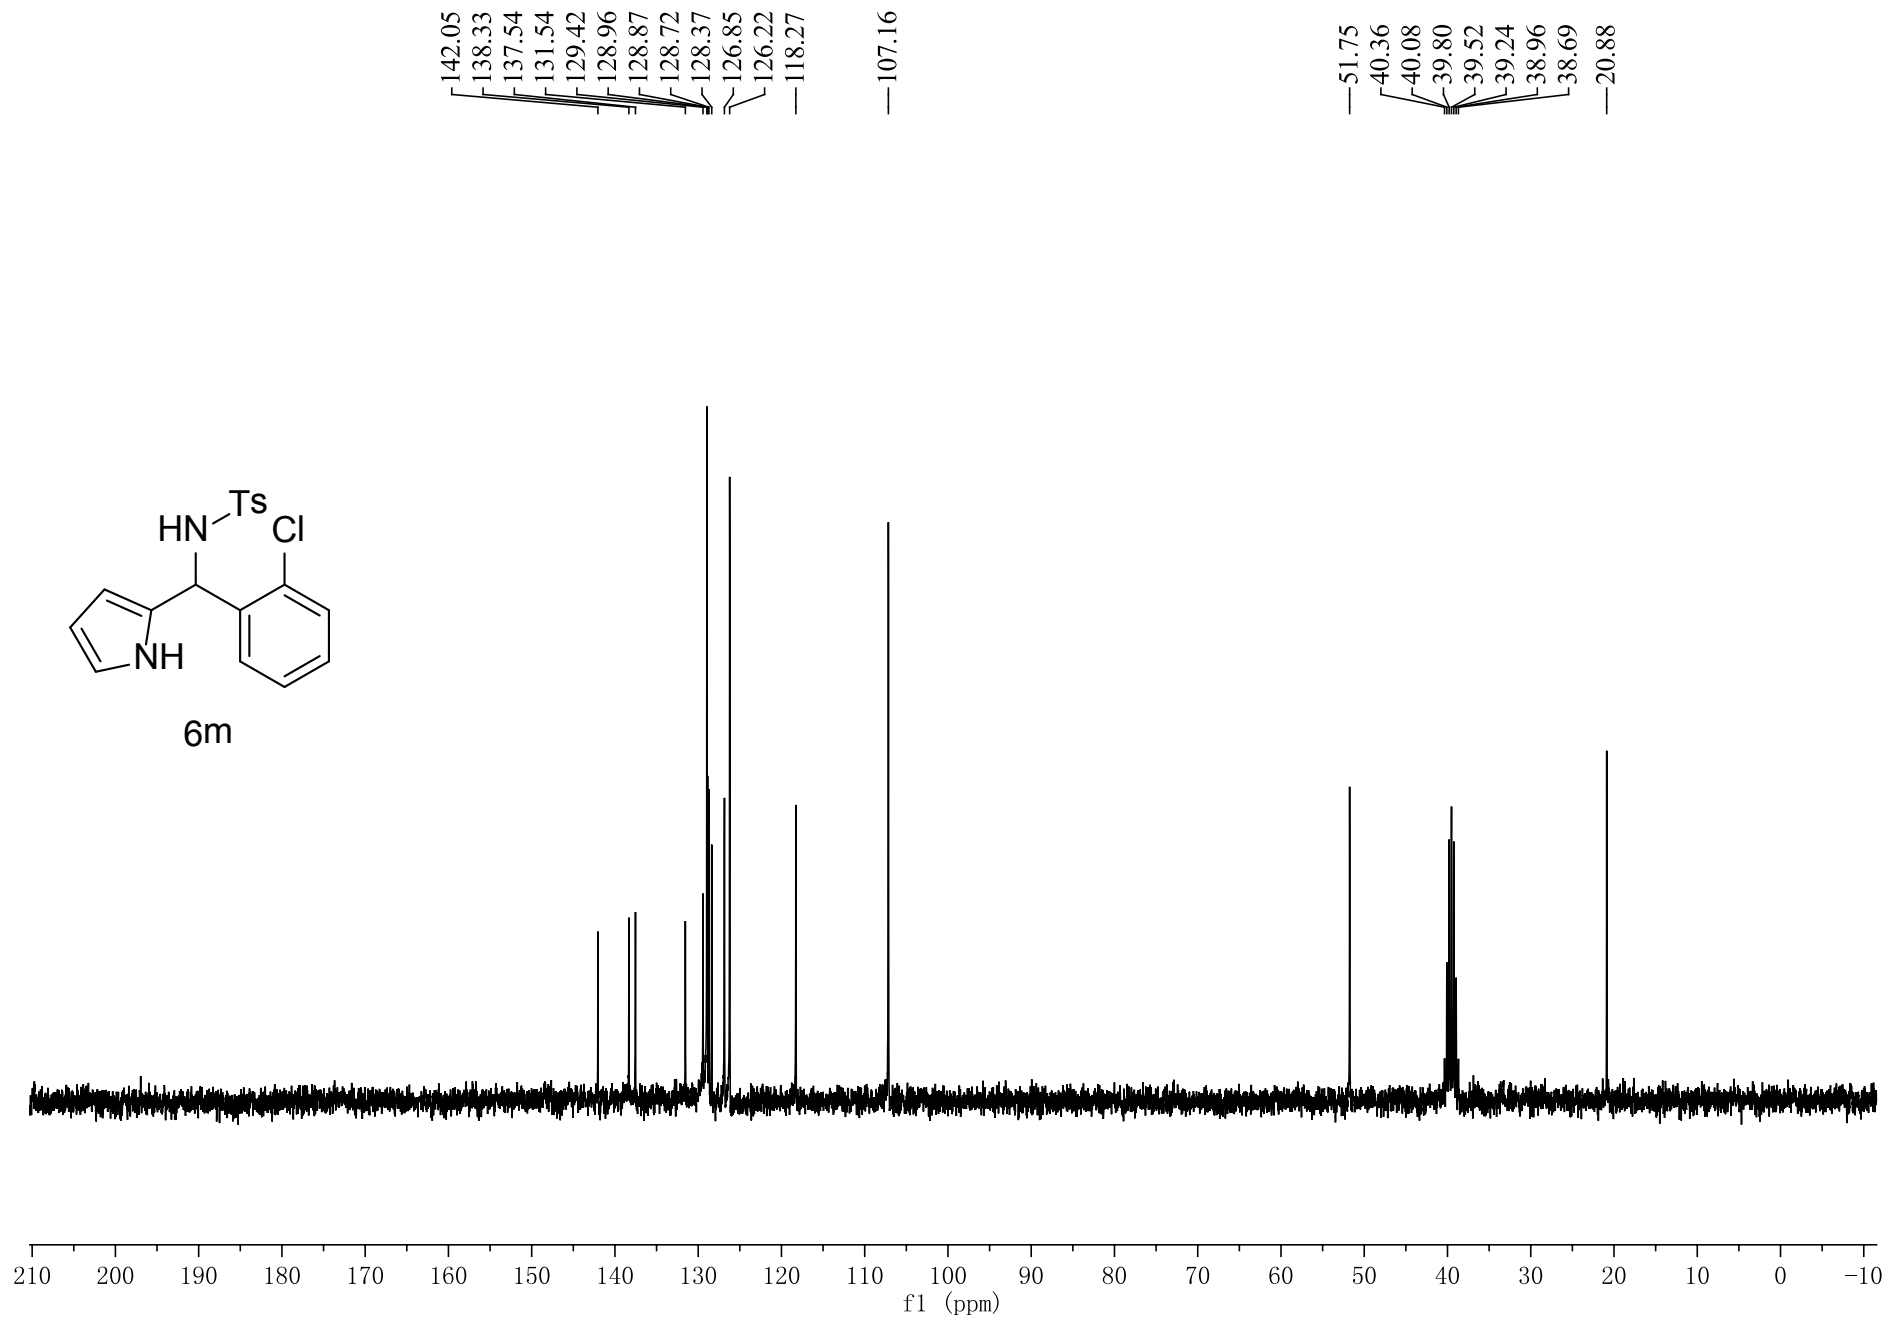

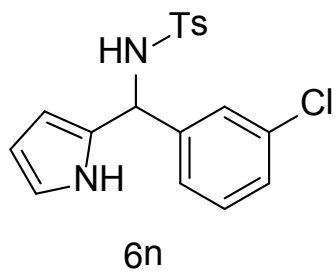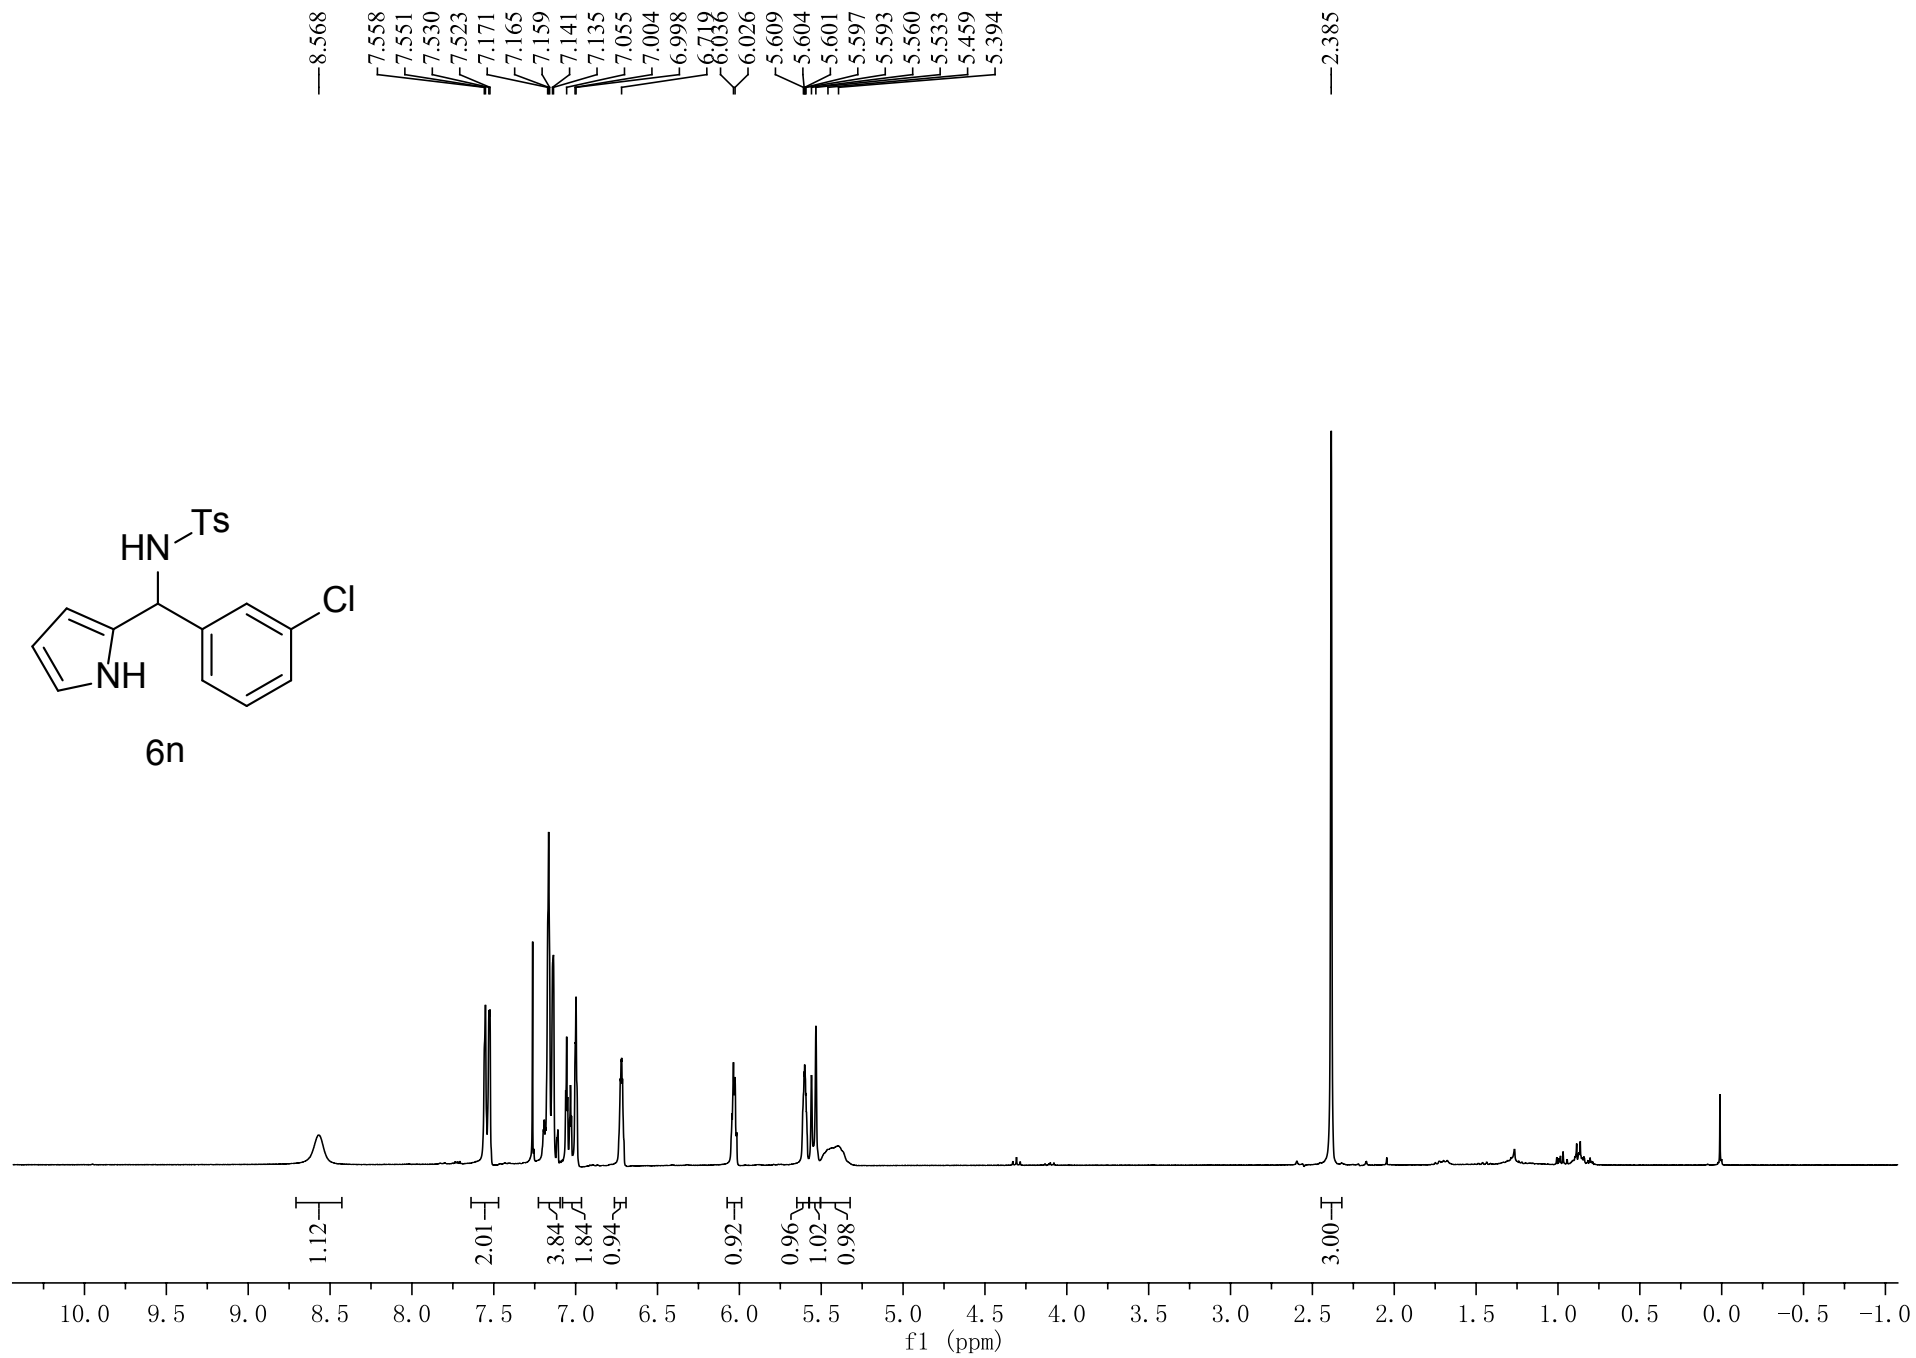



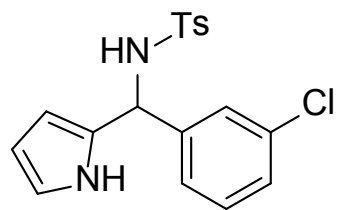

6n

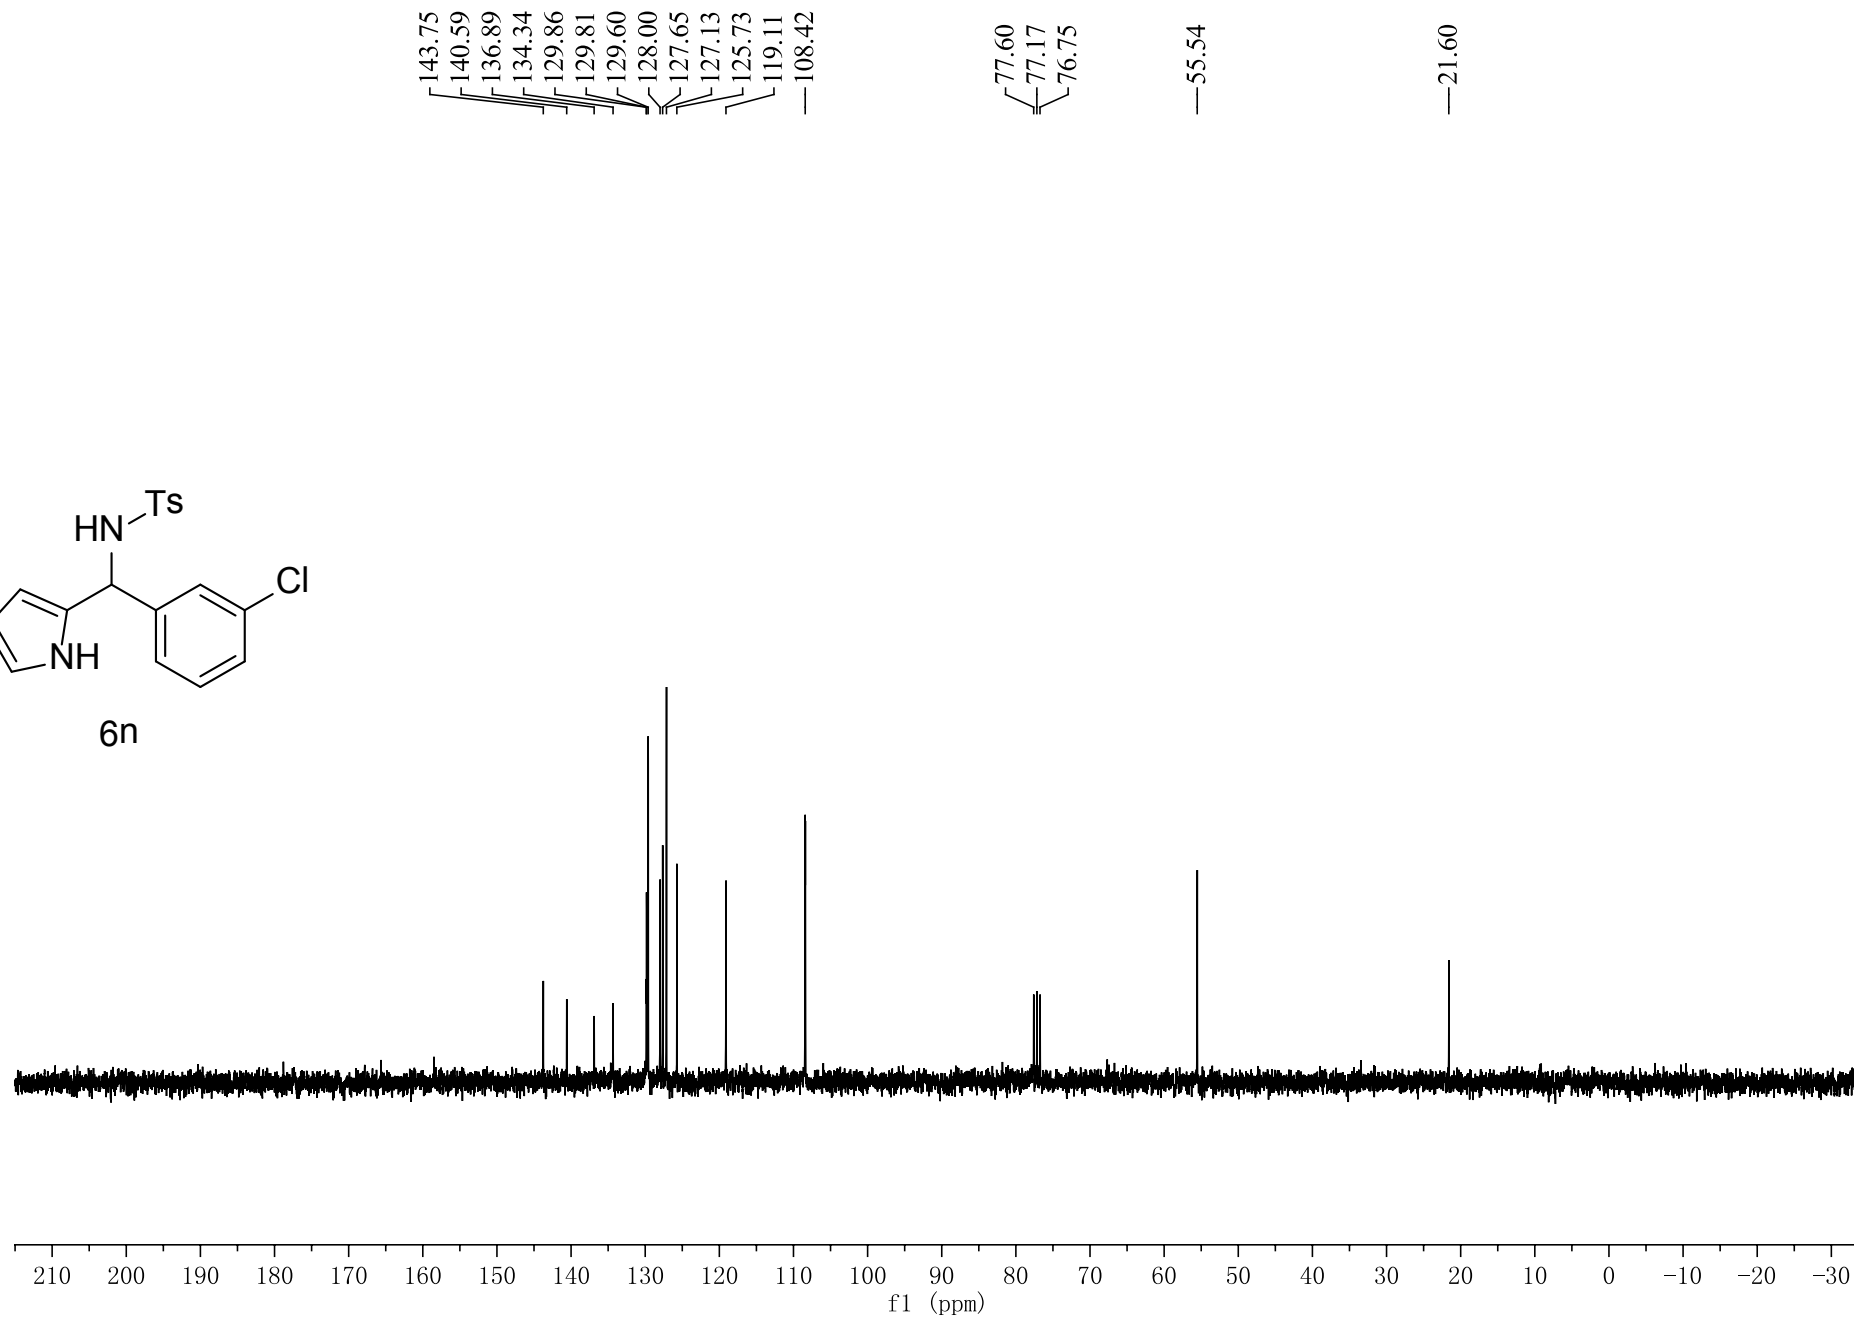

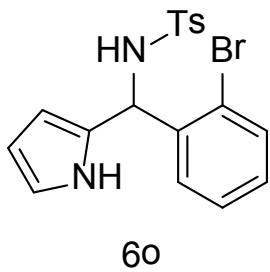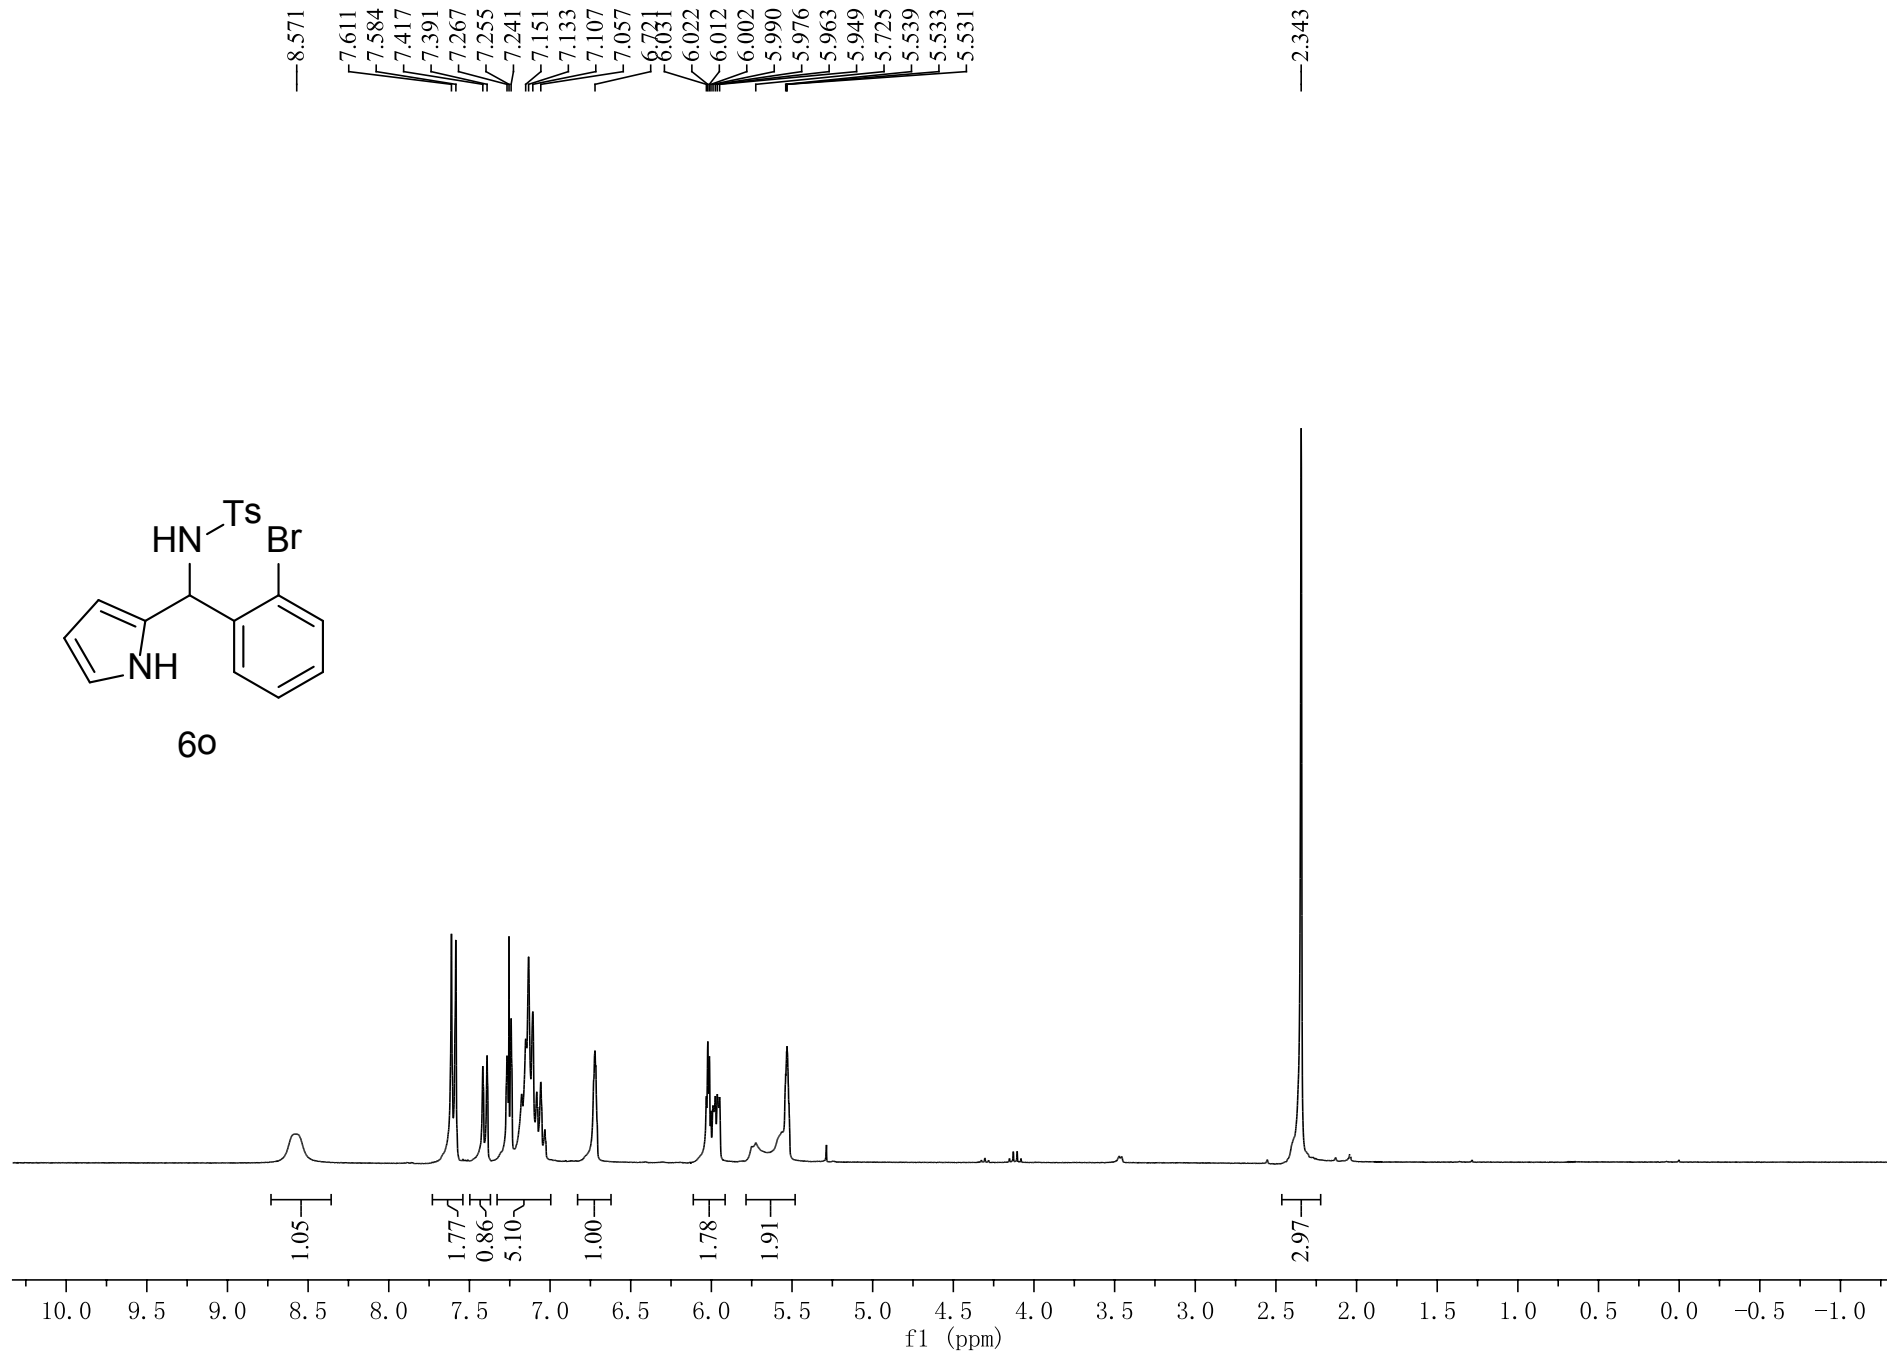

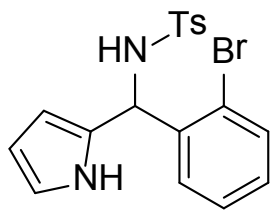

60

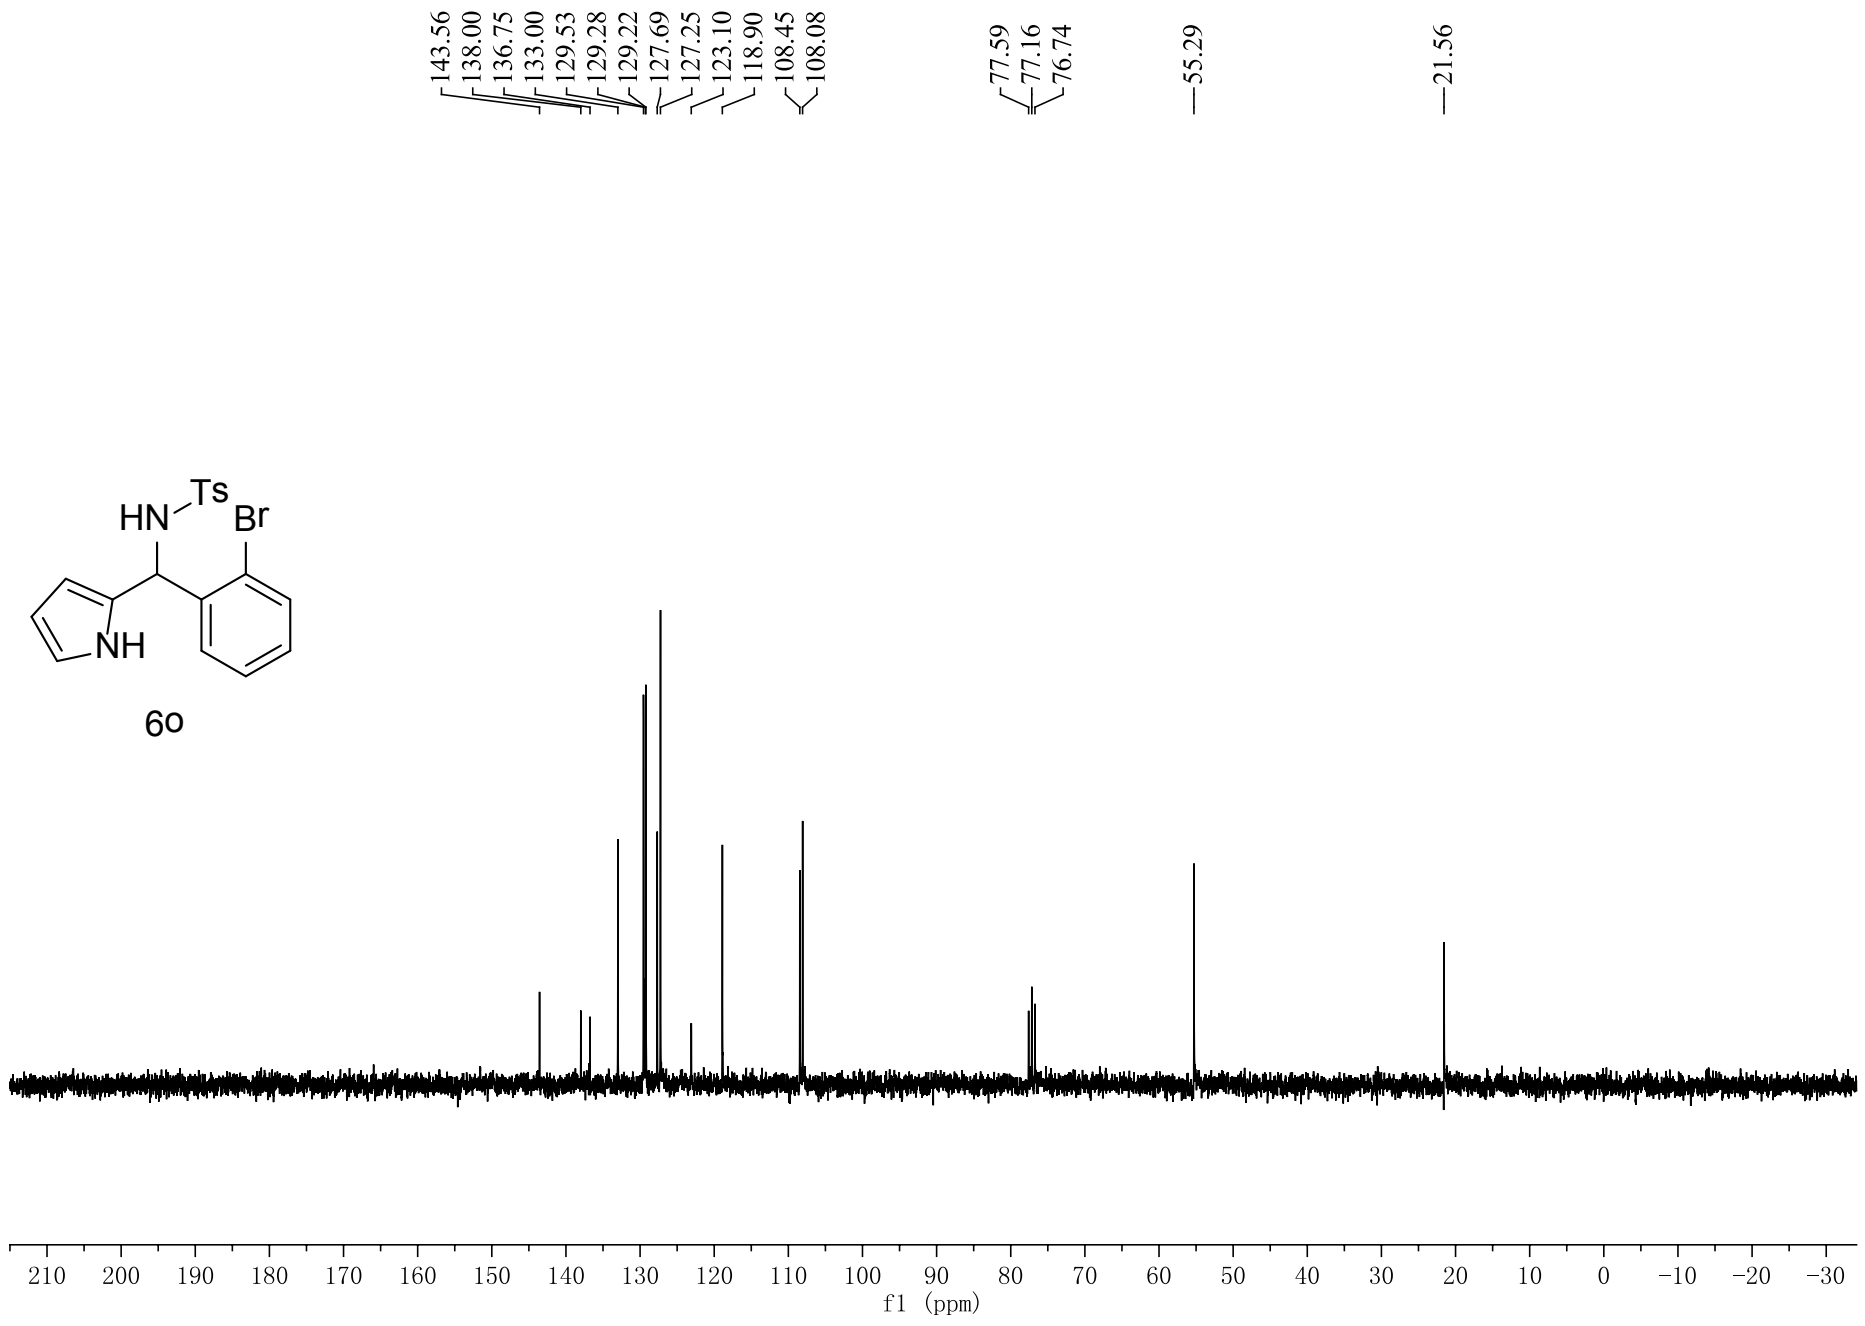

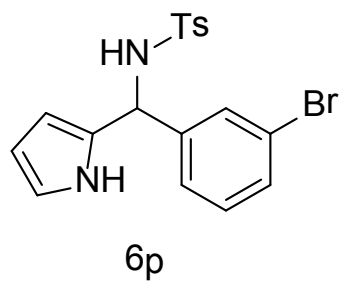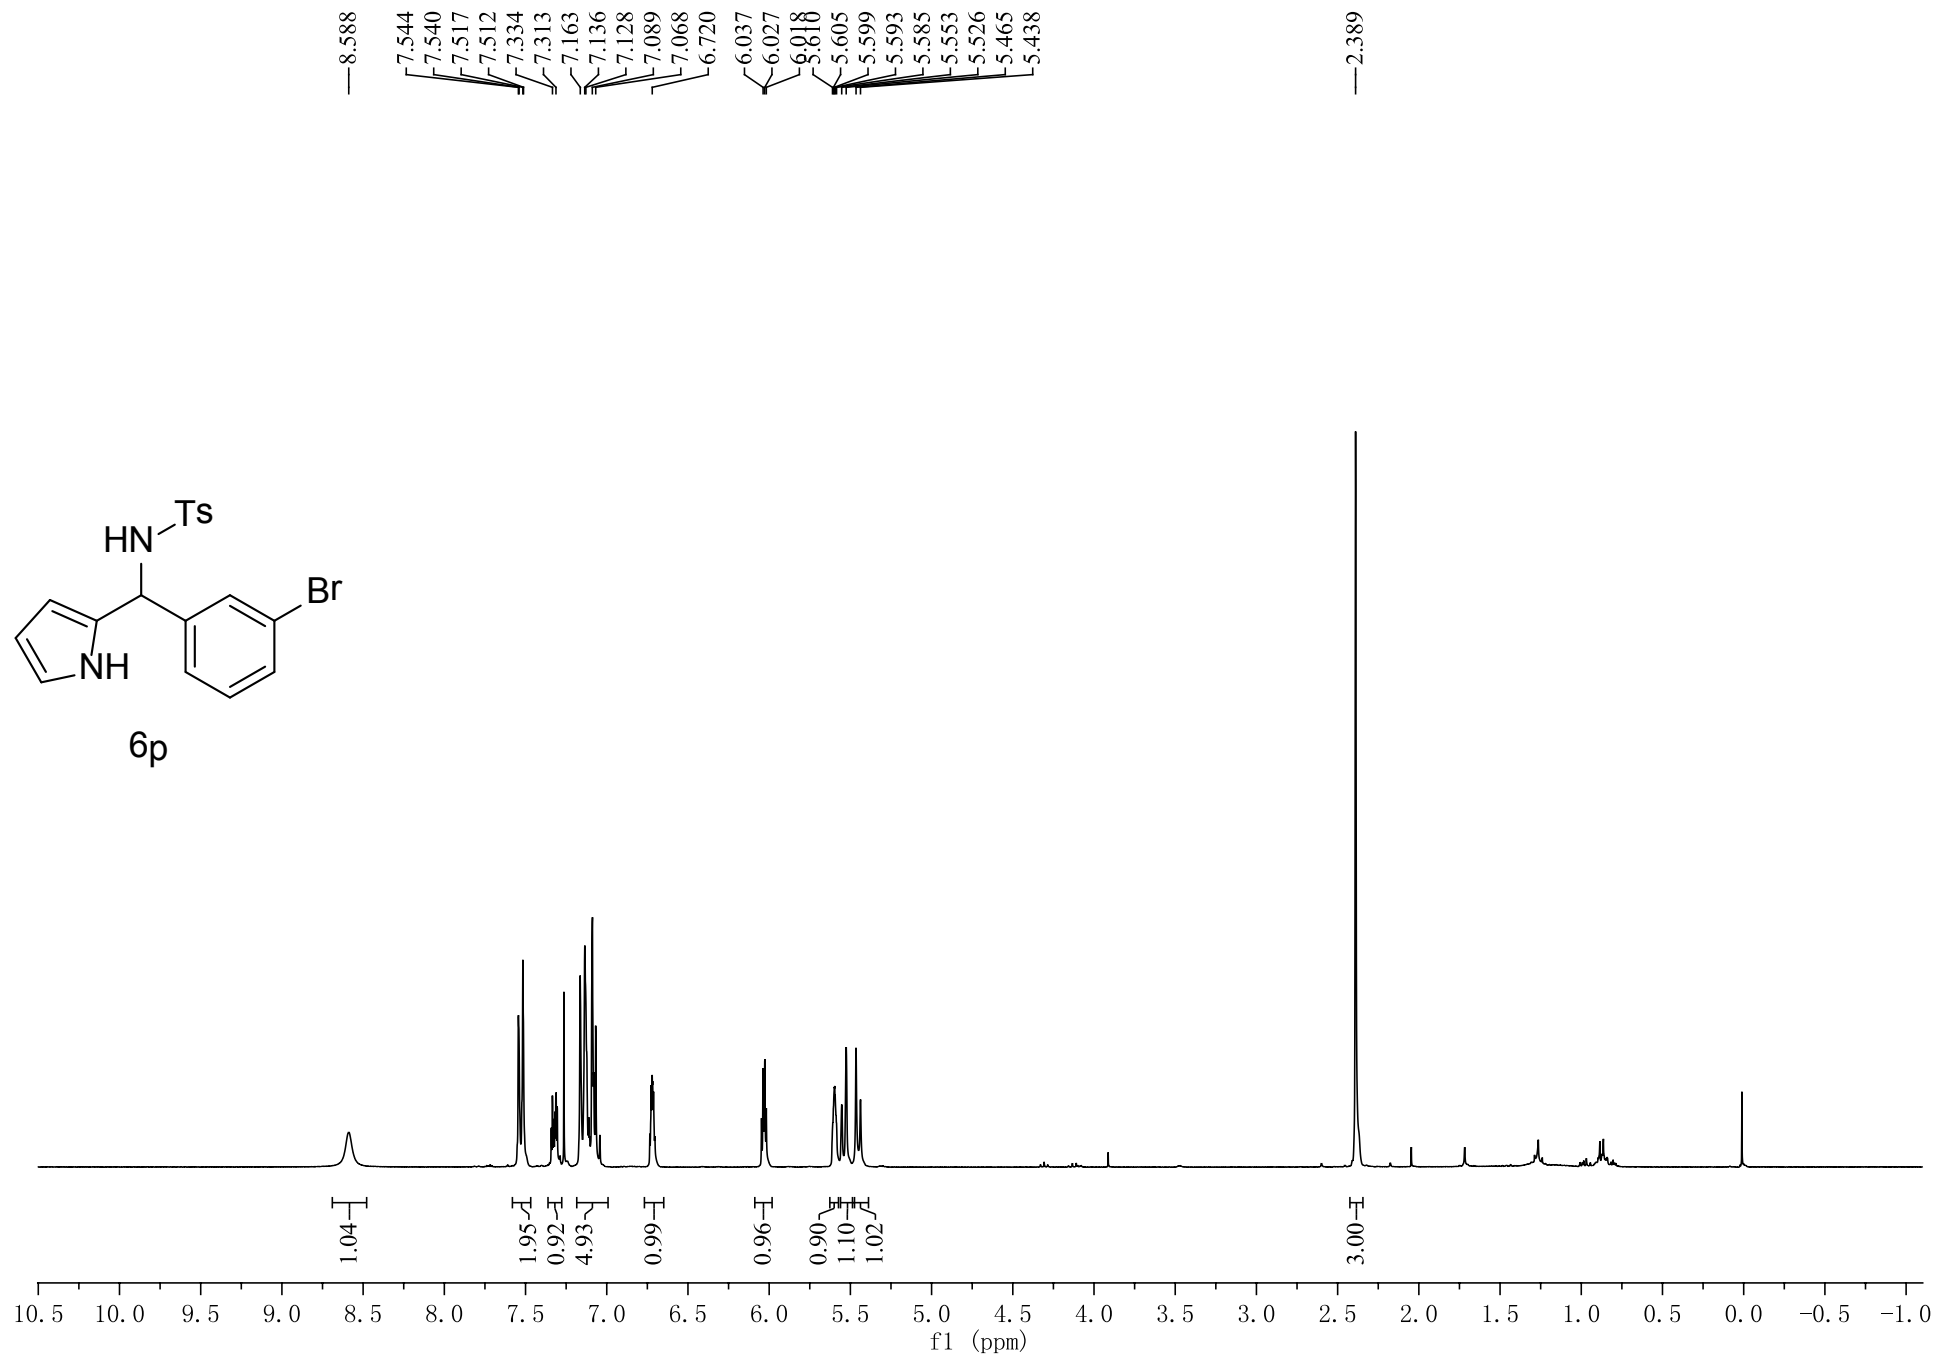

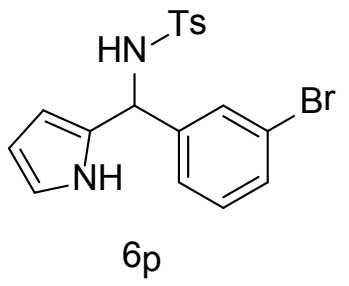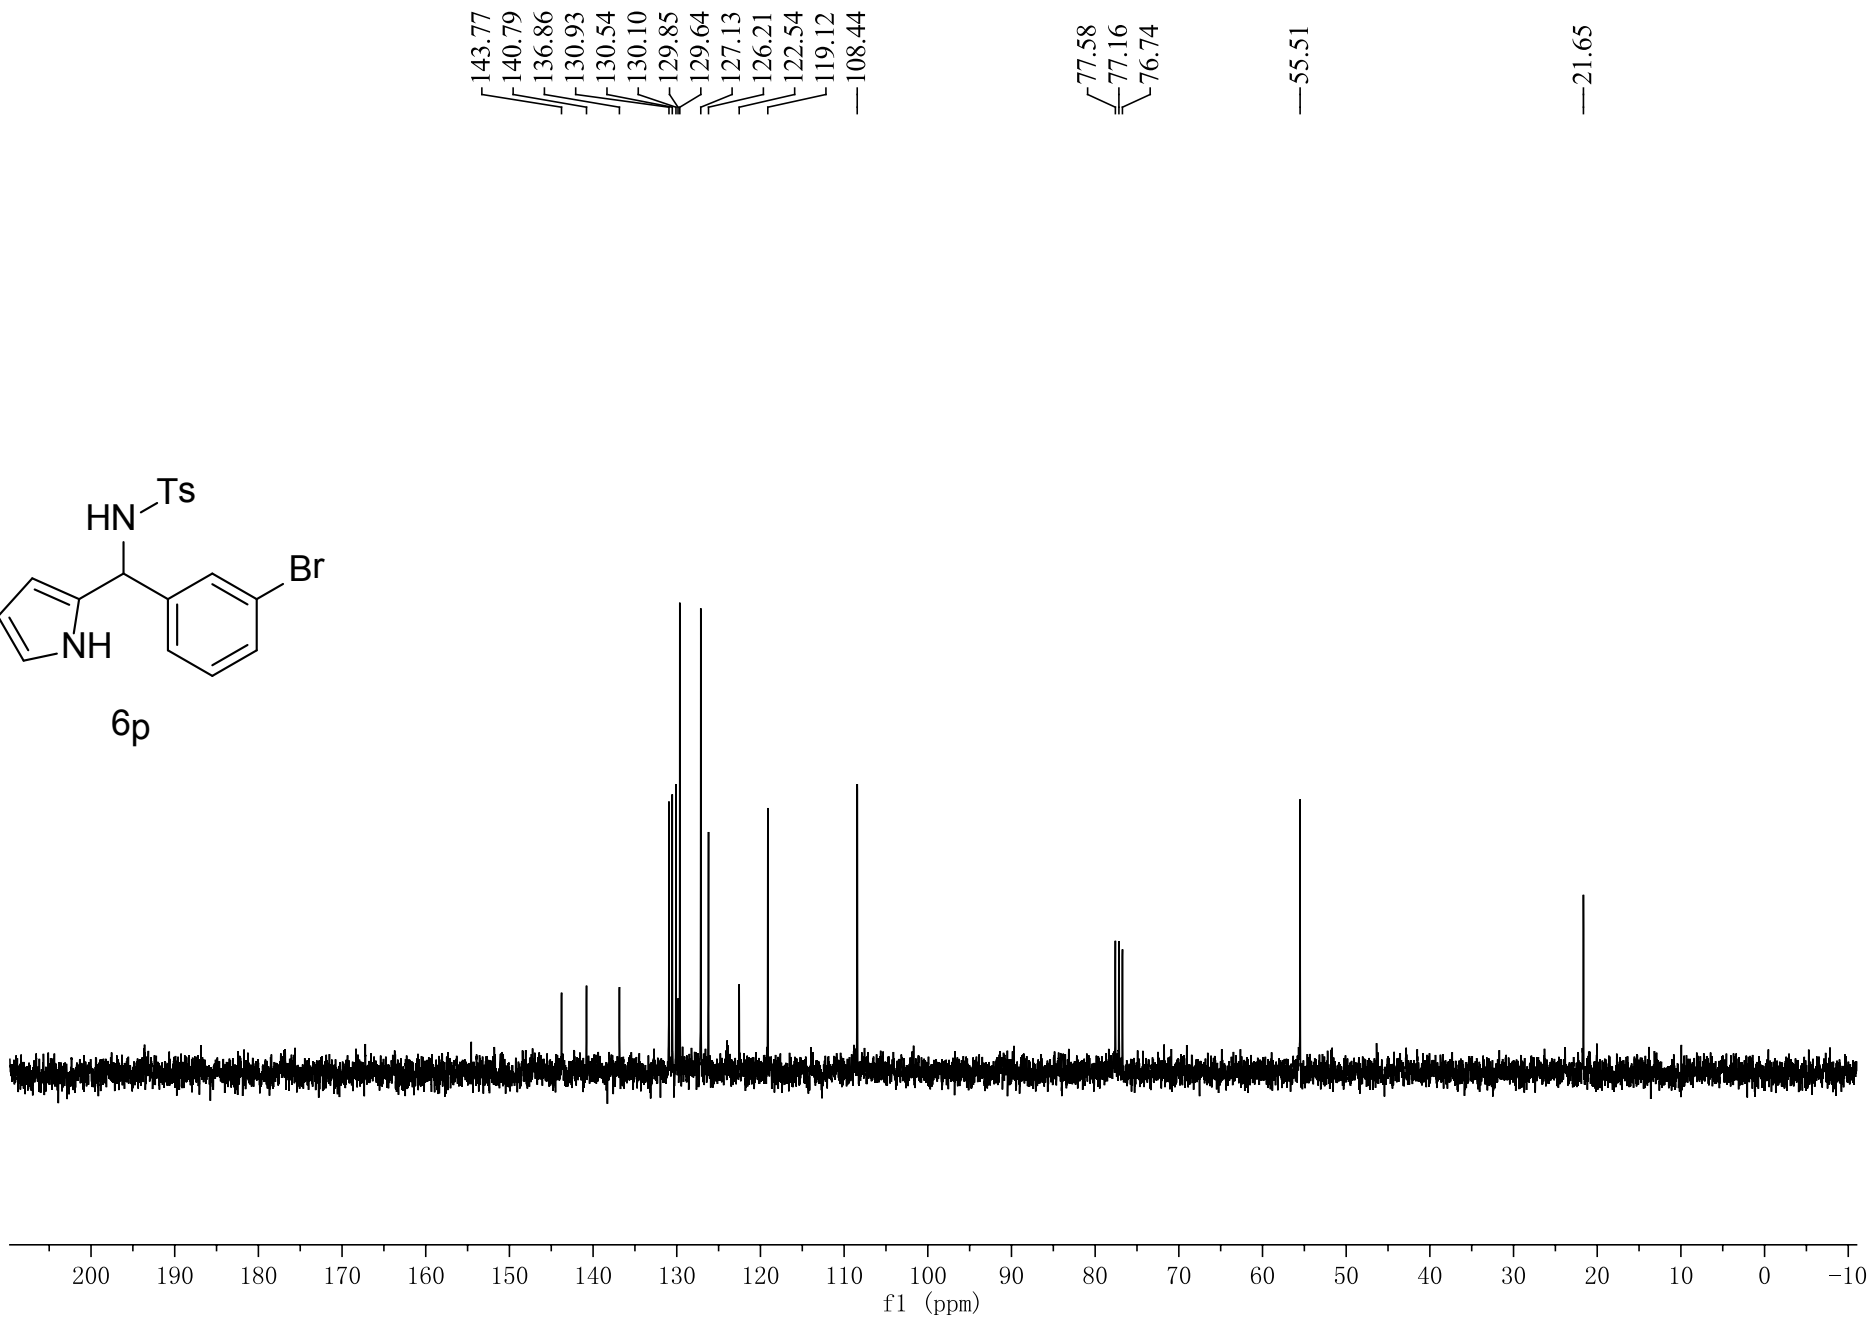

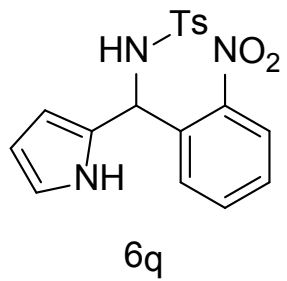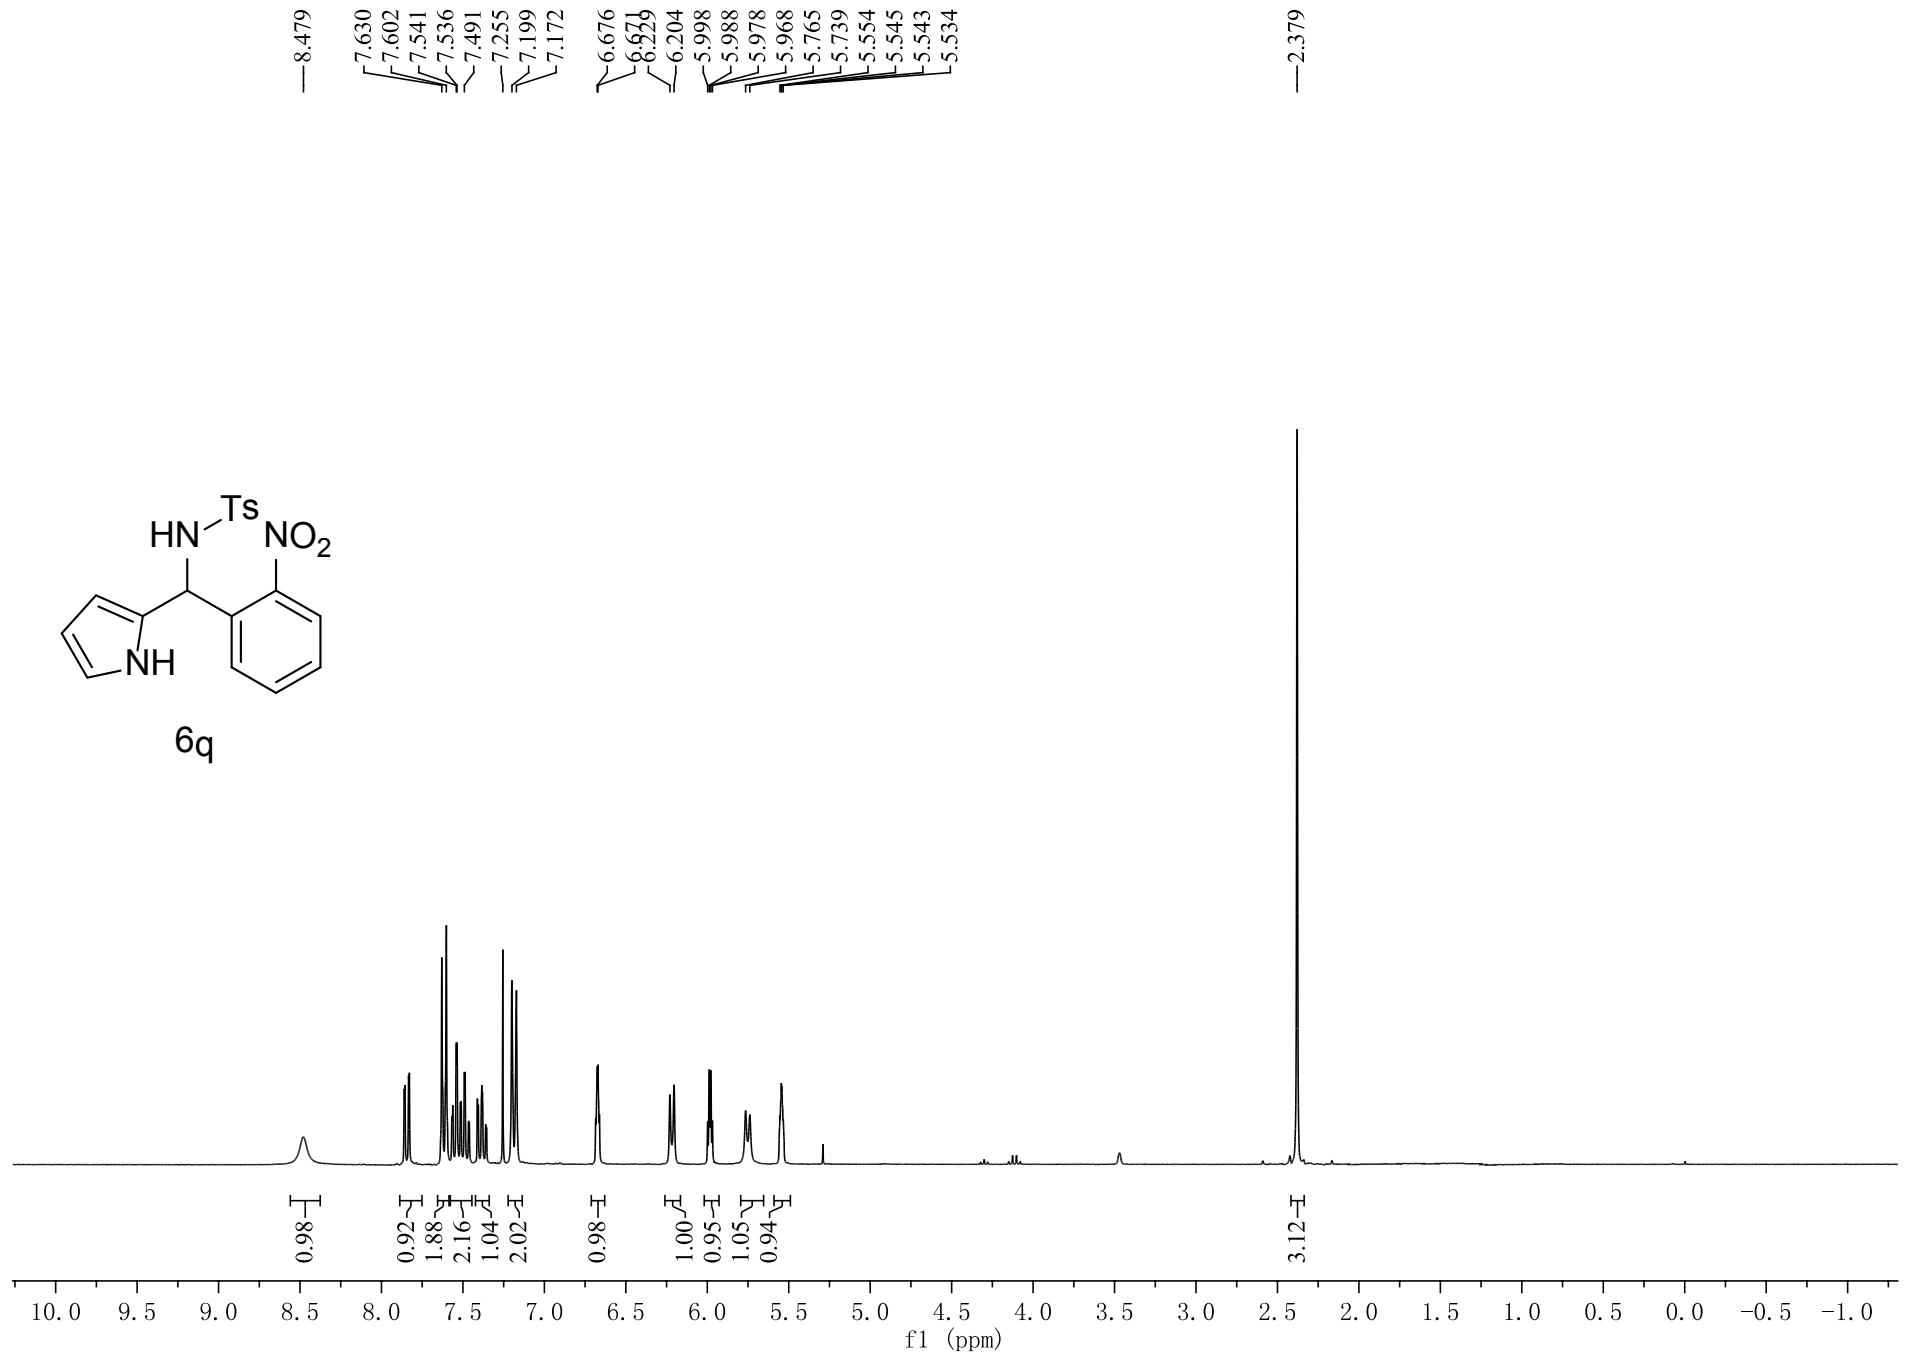

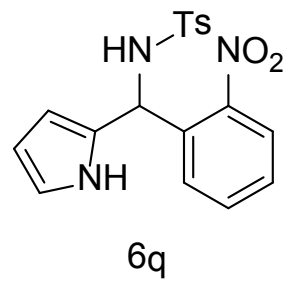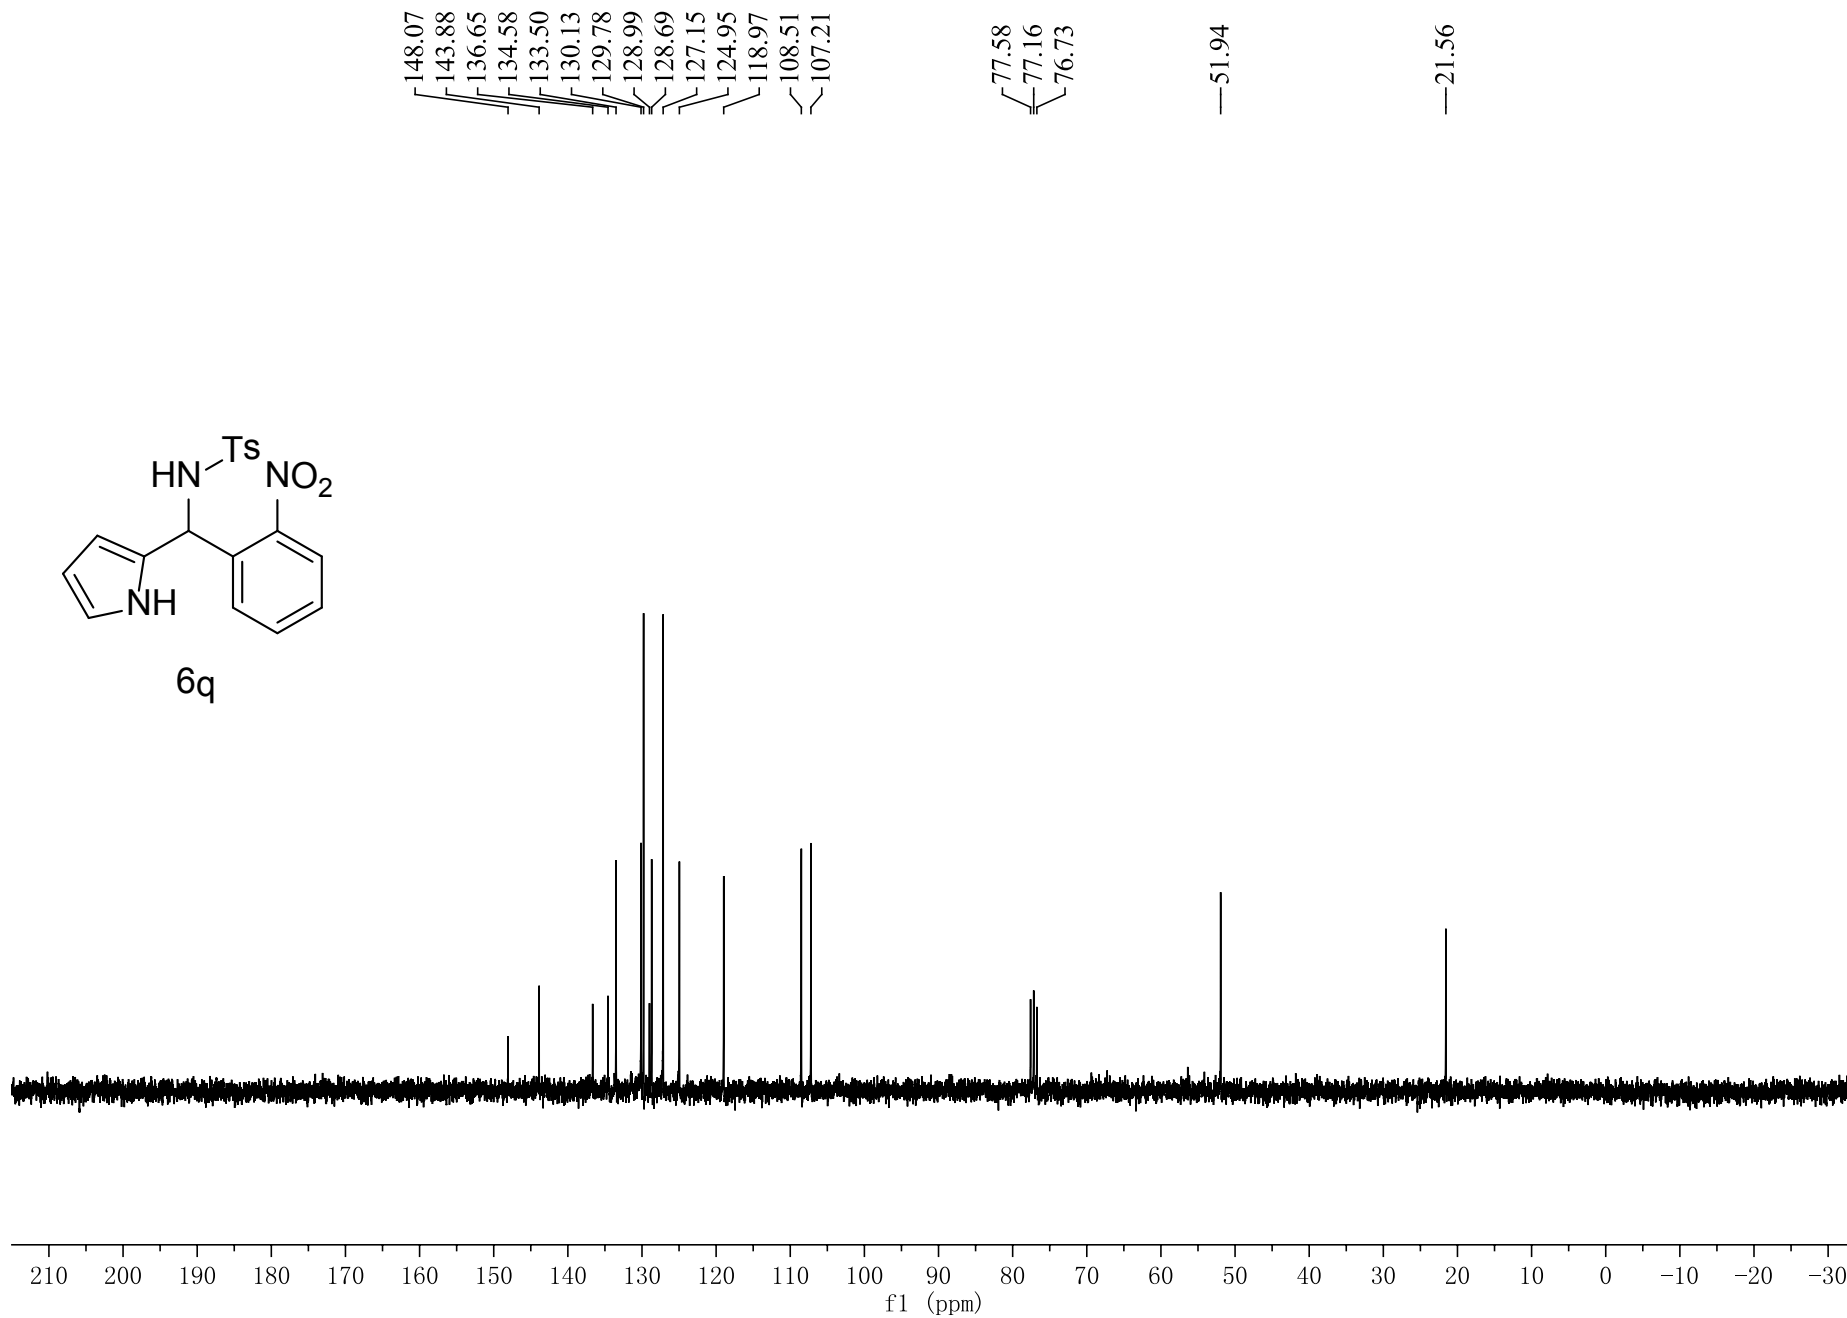

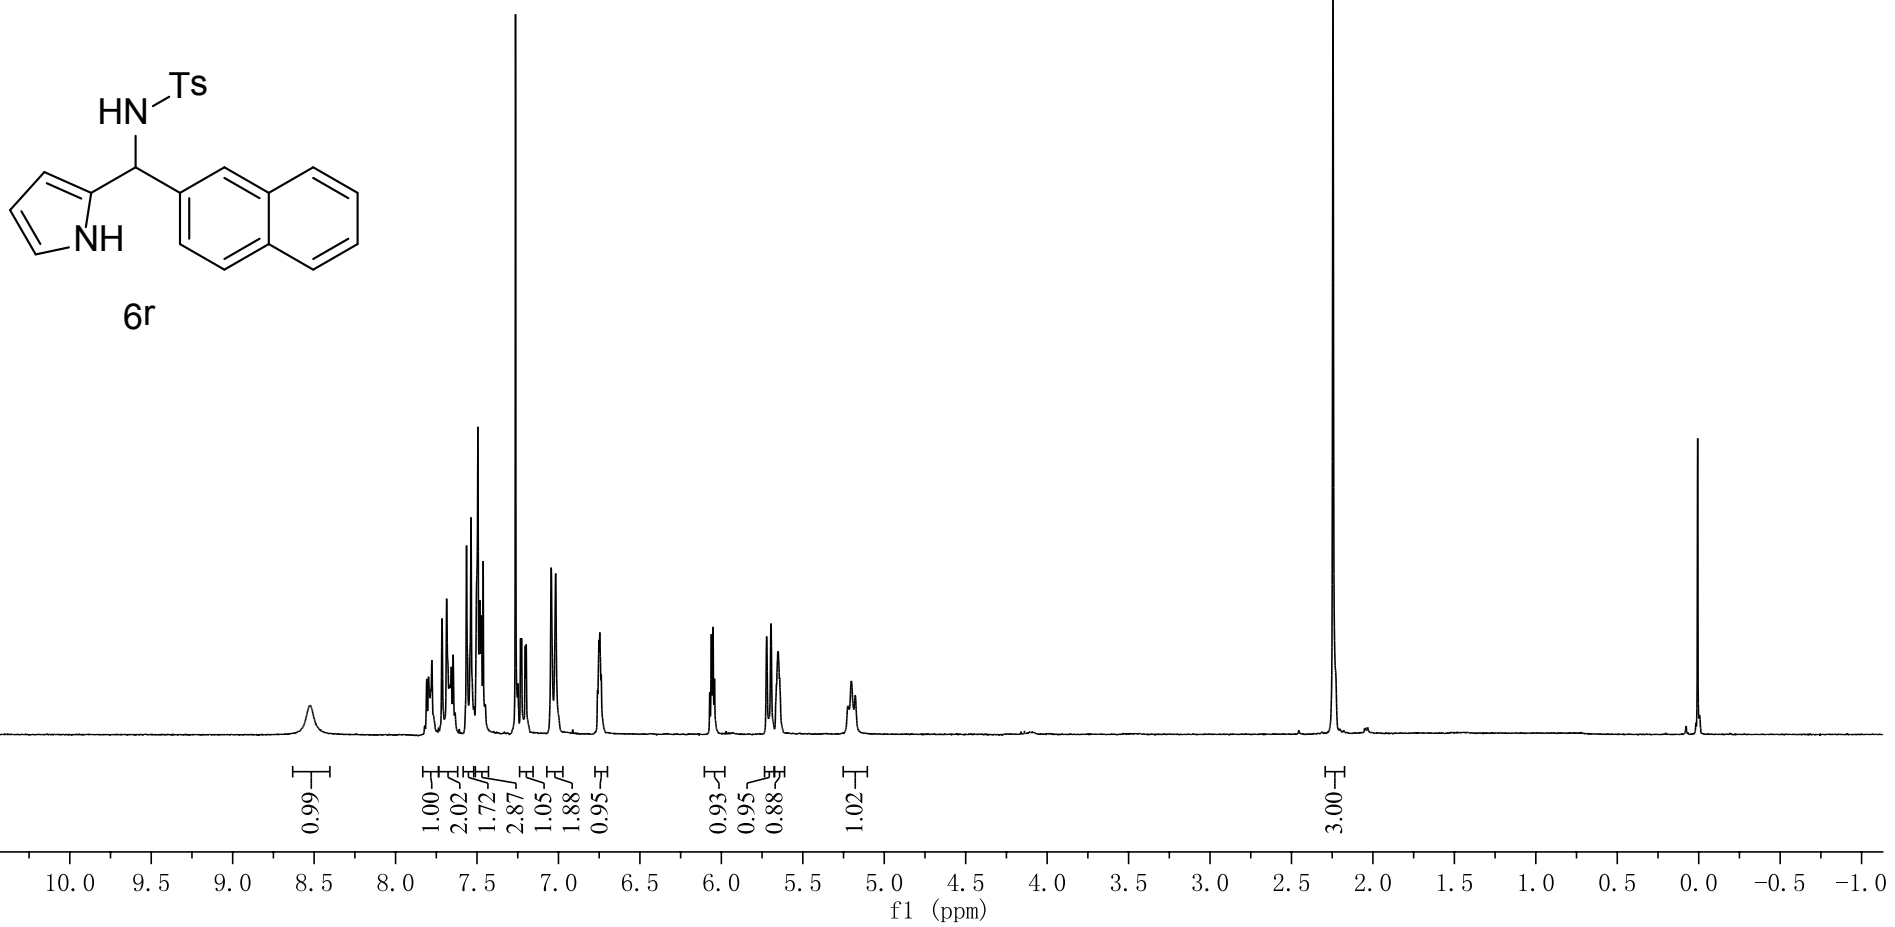



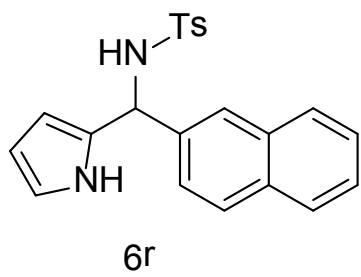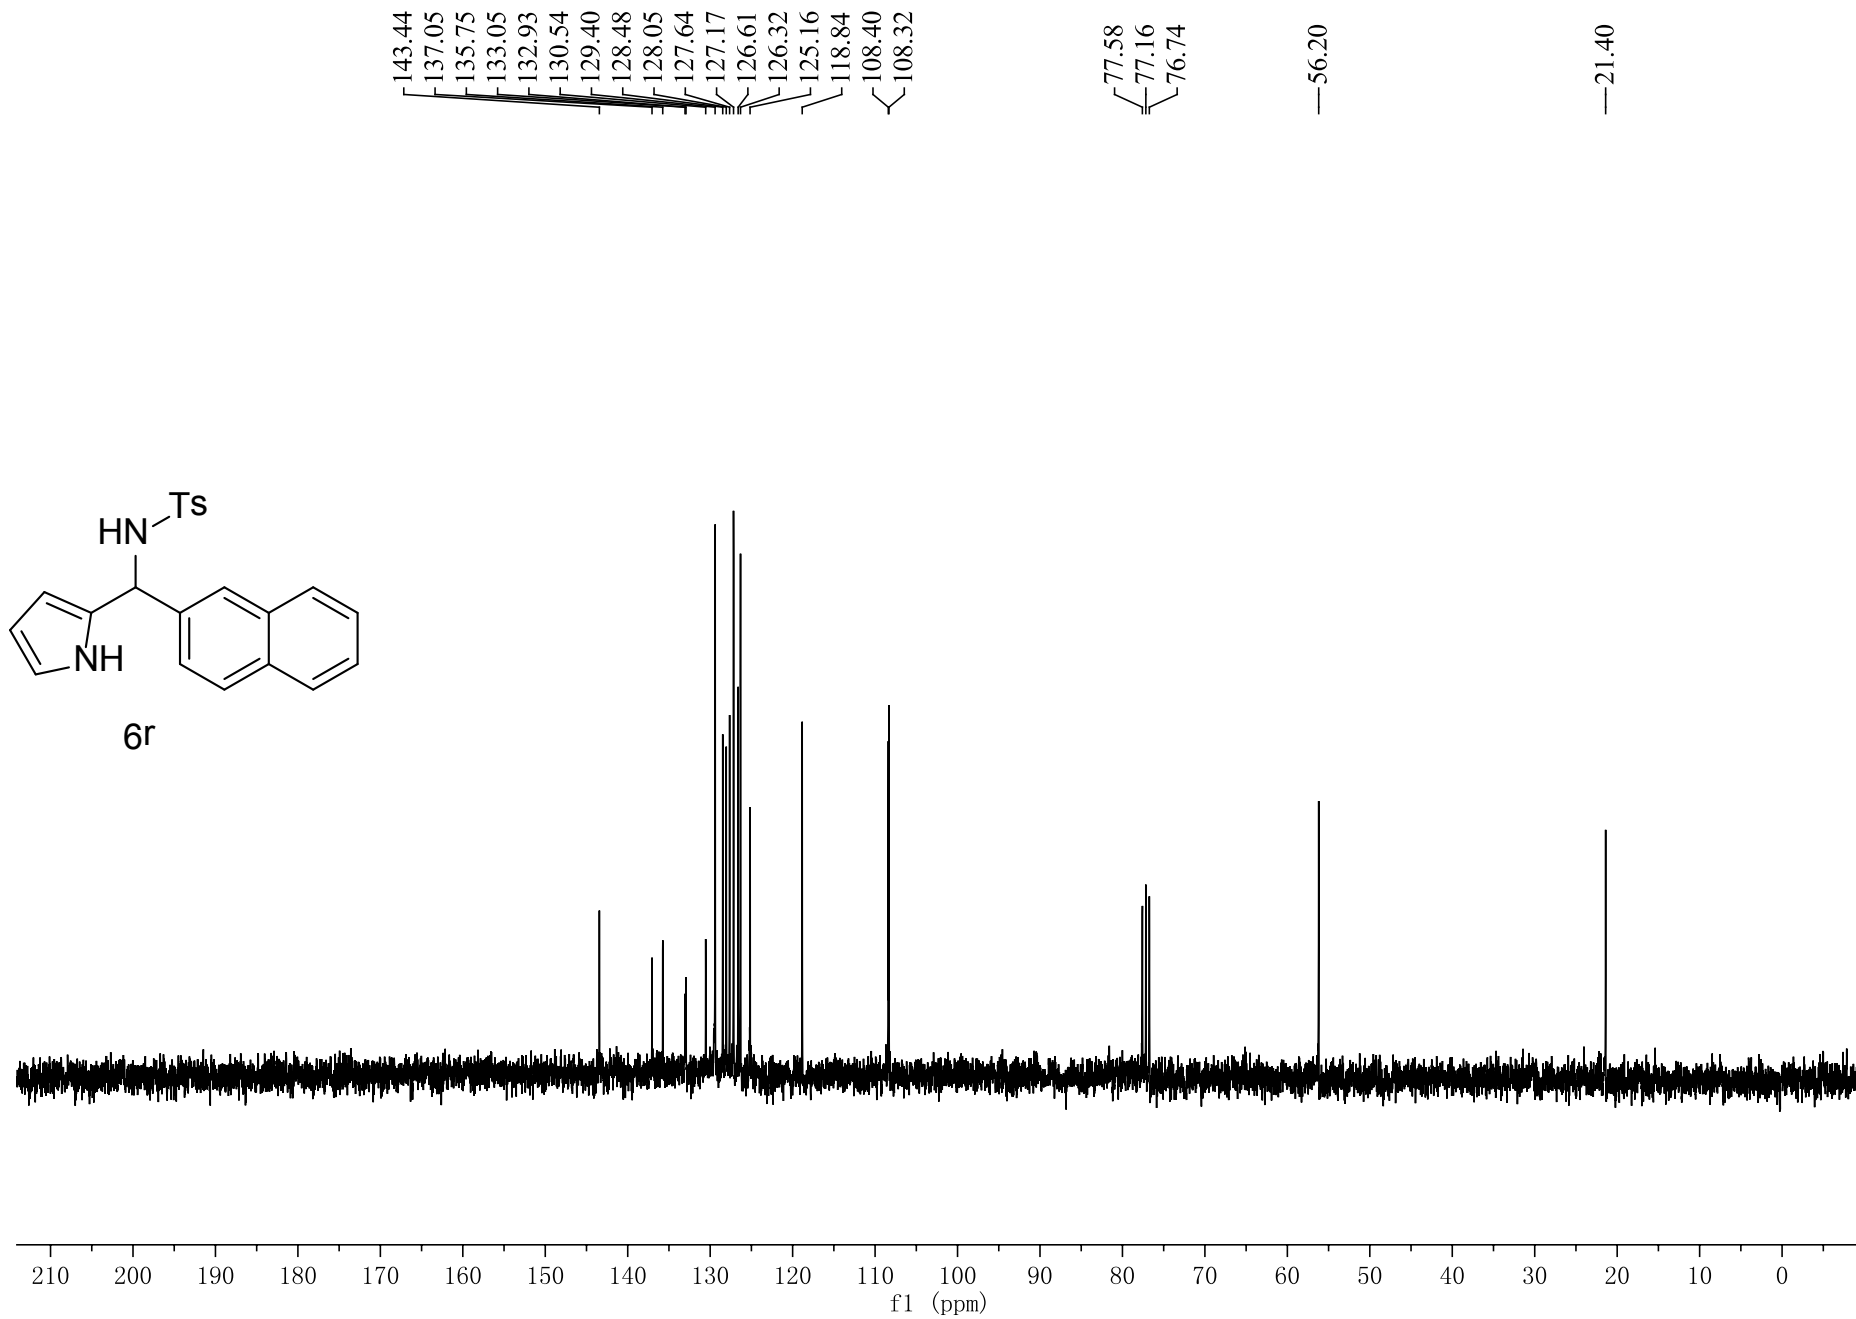

## 7. Copies of HPLC Spectra

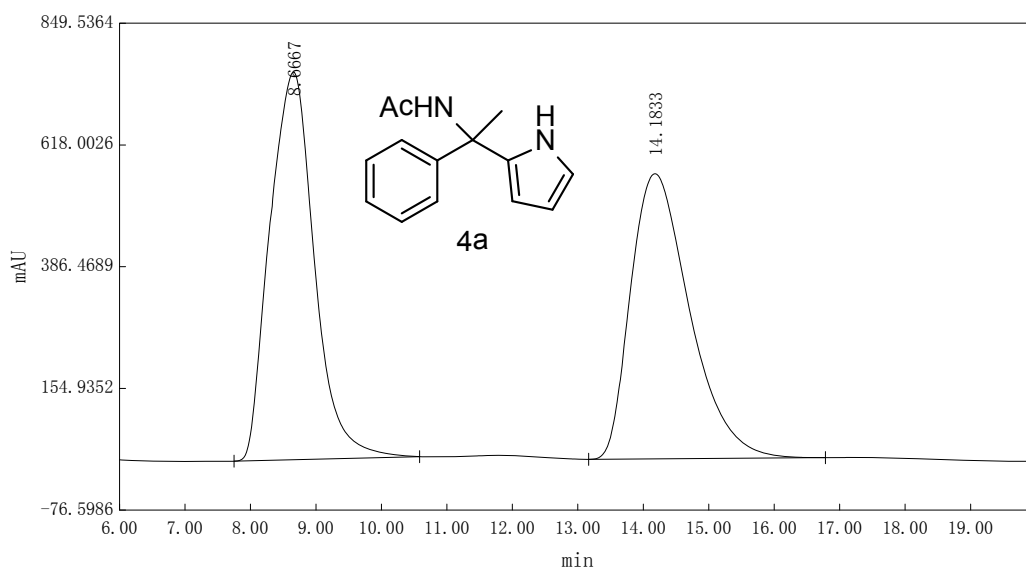

| Peak # | RetTime [min] | Area [mAU*s] | type | Peak width [s] | Area %  |
|--------|---------------|--------------|------|----------------|---------|
| 1      | 8.6667        | 36315.0336   | BB   | 170.0000       | 50.6609 |
| 2      | 14.1833       | 35367.5301   | FF   | 217.0000       | 49.3391 |

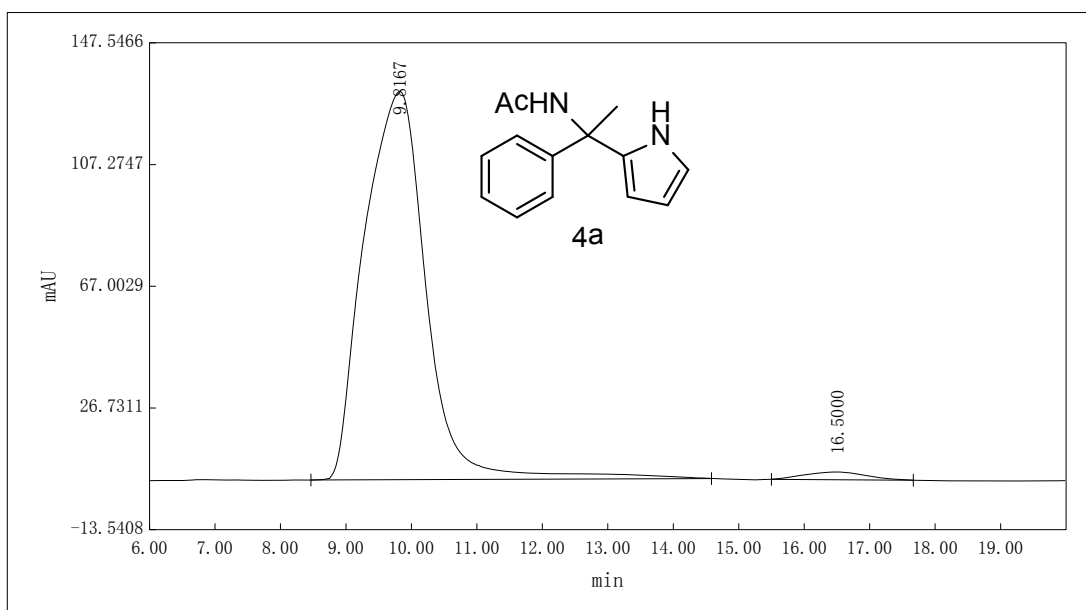

| Peak # | RetTime [min] | Area [mAU*s] | type | Peak width [s] | Area %  |
|--------|---------------|--------------|------|----------------|---------|
| 1      | 9.8167        | 8830.2375    | FF   | 367.0000       | 98.0719 |
| 2      | 16.5000       | 173.6024     | FF   | 130.0000       | 1.9281  |

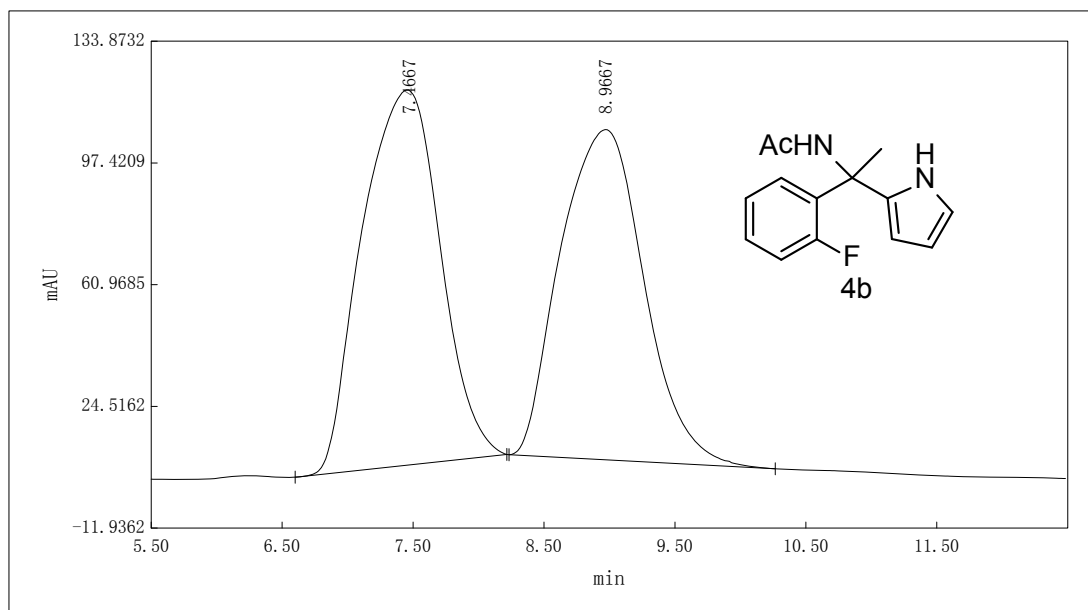

| Peak # | RetTime [min] | Area [mAU*s] | type | Peak width [s] | Area %  |
|--------|---------------|--------------|------|----------------|---------|
| 1      | 7.4667        | 4865.7272    | FF   | 97.0000        | 51.5130 |
| 2      | 8.9667        | 4579.9033    | FF   | 122.0000       | 48.4870 |

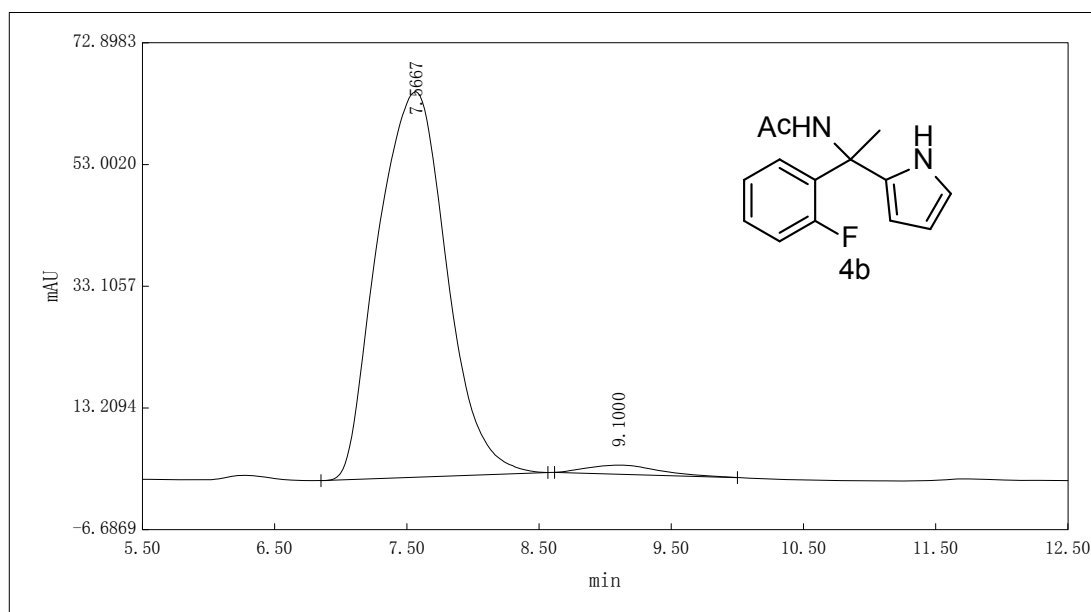

| Peak # | RetTime [min] | Area [mAU*s] | type | Peak width [s] | Area %  |
|--------|---------------|--------------|------|----------------|---------|
| 1      | 7.5667        | 2384.0139    | FF   | 103.0000       | 97.5879 |
| 2      | 9.1000        | 58.9253      | FF   | 83.0000        | 2.4121  |

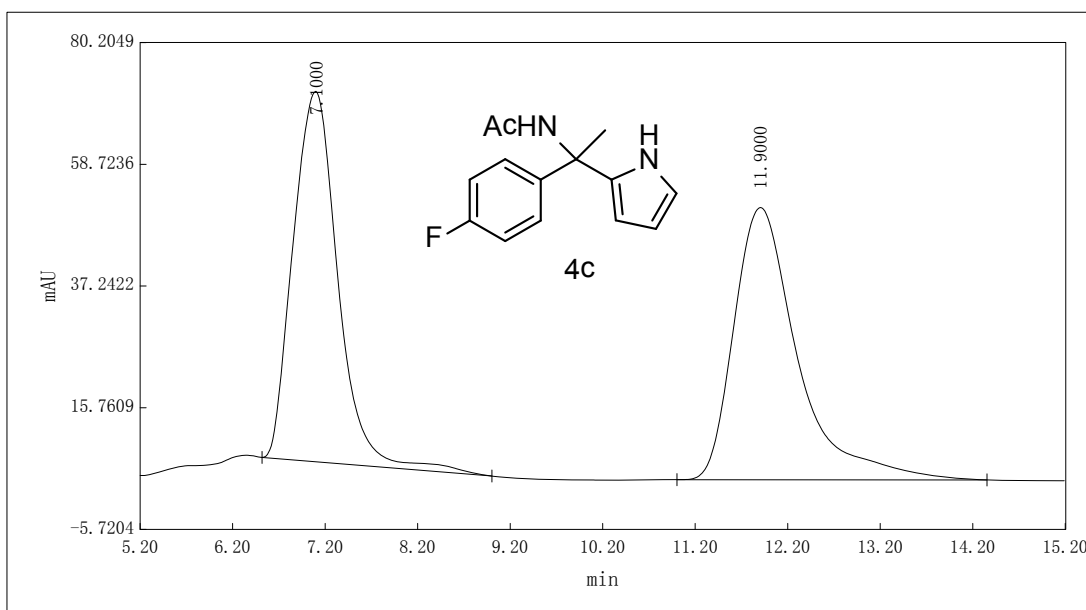

| Peak # | RetTime [min] | Area [mAU*s] | type | Peak width [s] | Area %  |
|--------|---------------|--------------|------|----------------|---------|
| 1      | 7.1000        | 2293.4337    | FF   | 149.0000       | 49.0152 |
| 2      | 11.9000       | 2385.5946    | FF   | 201.0000       | 50.9848 |

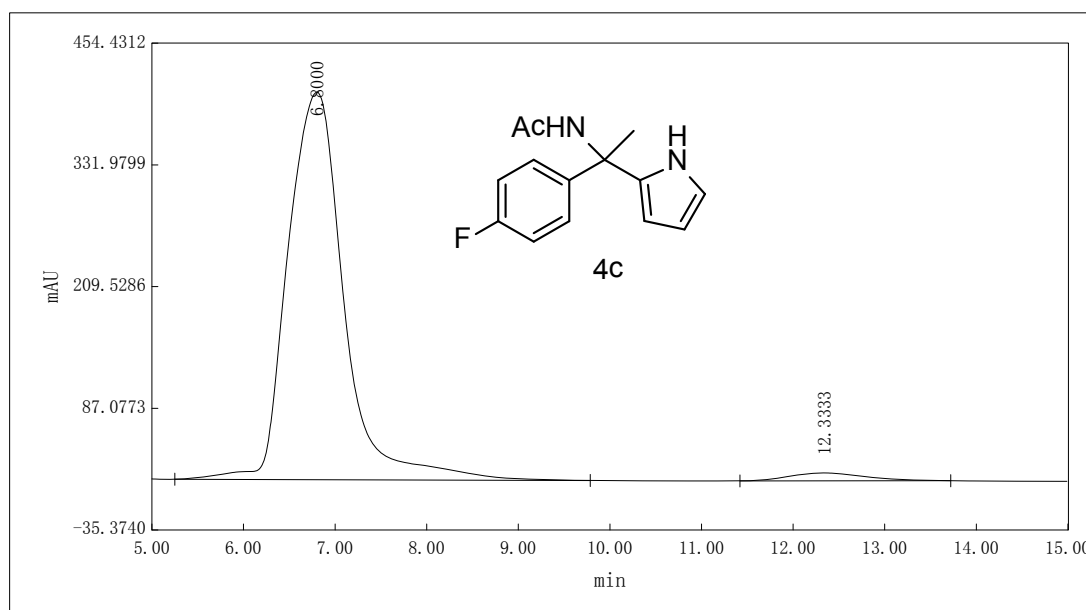

| Peak # | RetTime [min] | Area [mAU*s] | type | Peak width [s] | Area %  |
|--------|---------------|--------------|------|----------------|---------|
| 1      | 6.8000        | 17301.3755   | FF   | 272.0000       | 97.3378 |
| 2      | 12.3333       | 473.2022     | FF   | 138.0000       | 2.6622  |

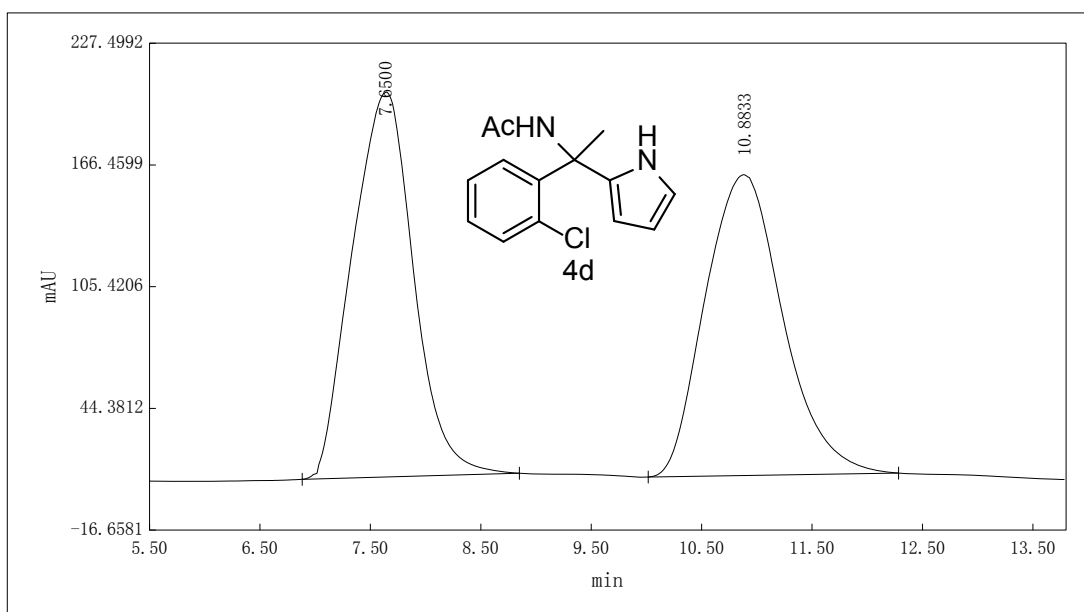

| Peak # | RetTime [min] | Area [mAU*s] | type | Peak width [s] | Area %  |
|--------|---------------|--------------|------|----------------|---------|
| 1      | 7.6500        | 7756.7320    | BB   | 118.0000       | 50.2576 |
| 2      | 10.8833       | 7677.2097    | BB   | 136.0000       | 49.7424 |

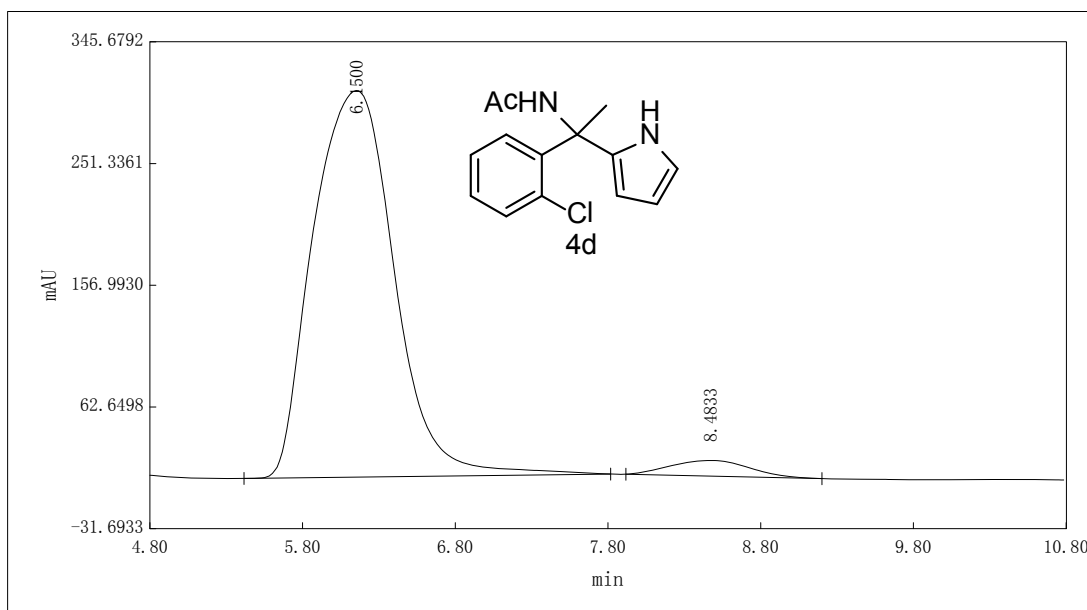

| Peak # | RetTime [min] | Area [mAU*s] | type | Peak width [s] | Area %  |
|--------|---------------|--------------|------|----------------|---------|
| 1      | 6.1500        | 11554.9260   | FF   | 144.0000       | 96.2227 |
| 2      | 8.4833        | 453.5994     | BB   | 77.0000        | 3.7773  |

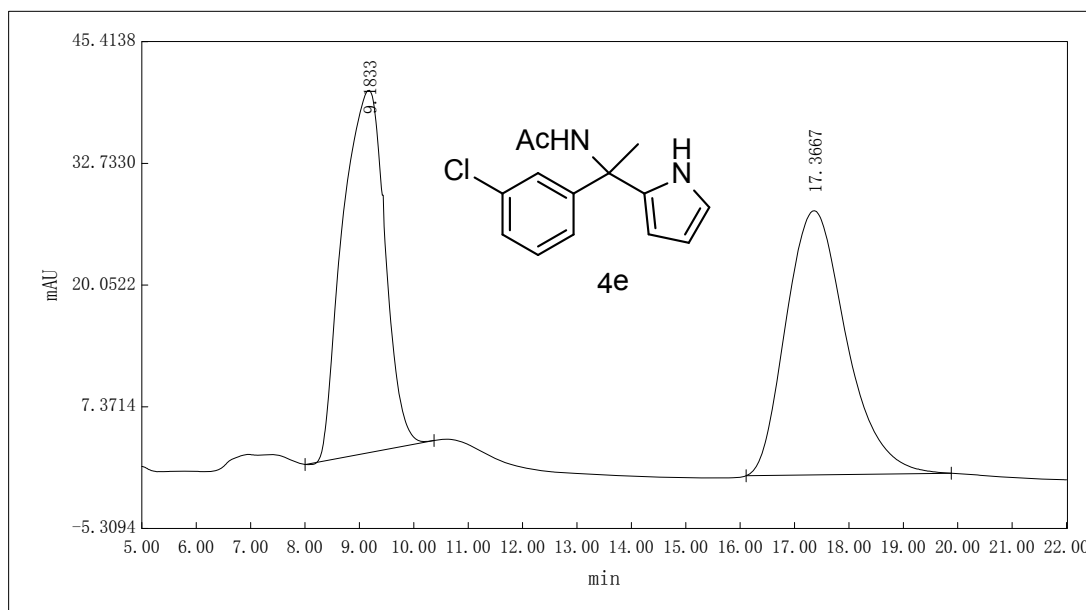

| Peak # | RetTime [min] | Area [mAU*s] | type | Peak width [s] | Area %  |
|--------|---------------|--------------|------|----------------|---------|
| 1      | 9.1833        | 2123.3289    | FF   | 142.0000       | 49.1152 |
| 2      | 17.3667       | 2199.8328    | FF   | 226.0000       | 50.8848 |

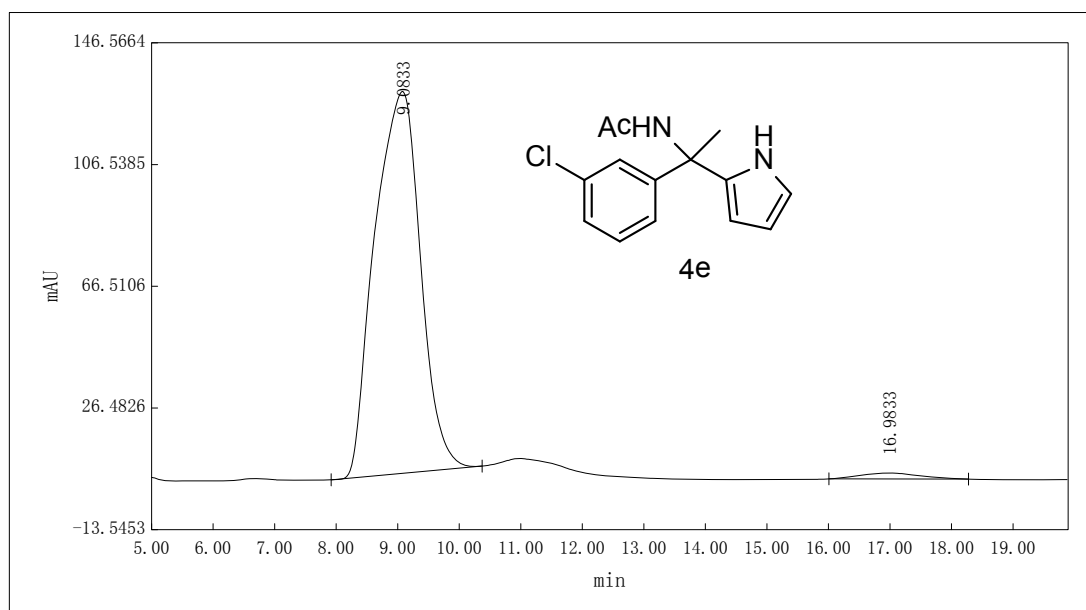

| Peak # | RetTime [min] | Area [mAU*s] | type | Peak width [s] | Area %  |
|--------|---------------|--------------|------|----------------|---------|
| 1      | 9.9833        | 6756.4068    | FF   | 147.0000       | 98.0310 |
| 2      | 16.9833       | 135.7033     | FF   | 136.0000       | 1.9690  |

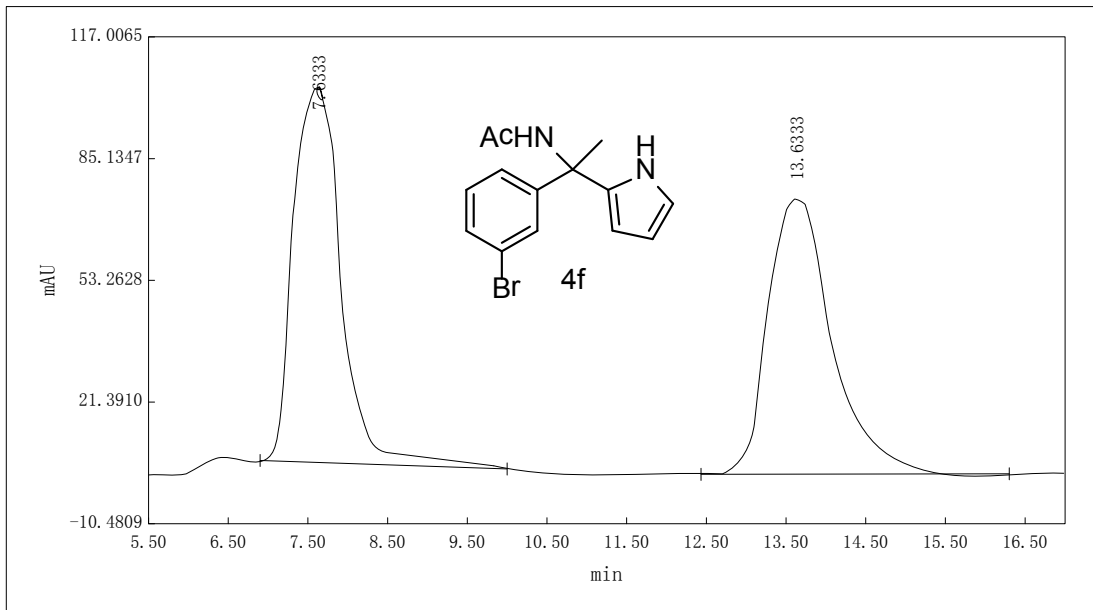

| Peak # | RetTime [min] | Area [mAU*s] | type | Peak width [s] | Area %  |
|--------|---------------|--------------|------|----------------|---------|
| 1      | 7.6333        | 4469.8395    | FF   | 186.0000       | 50.8938 |
| 2      | 13.6333       | 4312.8406    | FF   | 232.0000       | 49.1062 |

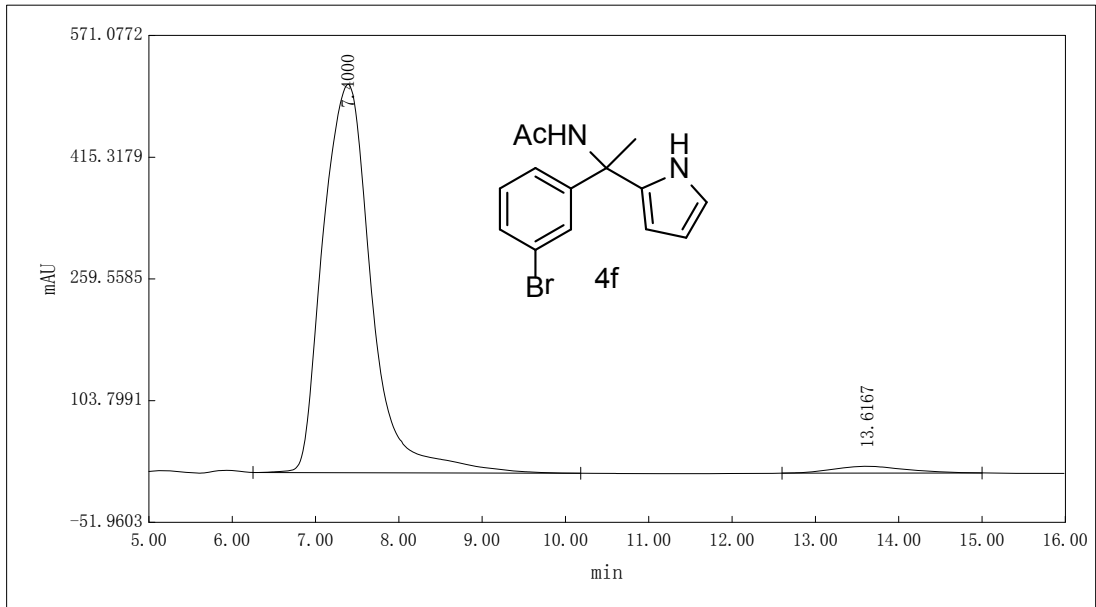

| Peak # | RetTime [min] | Area [mAU*s] | type | Peak width [s] | Area %  |
|--------|---------------|--------------|------|----------------|---------|
| 1      | 7.4000        | 20988.5592   | FF   | 236.0000       | 97.4216 |
| 2      | 13.6167       | 555.4973     | FF   | 144.0000       | 2.5784  |

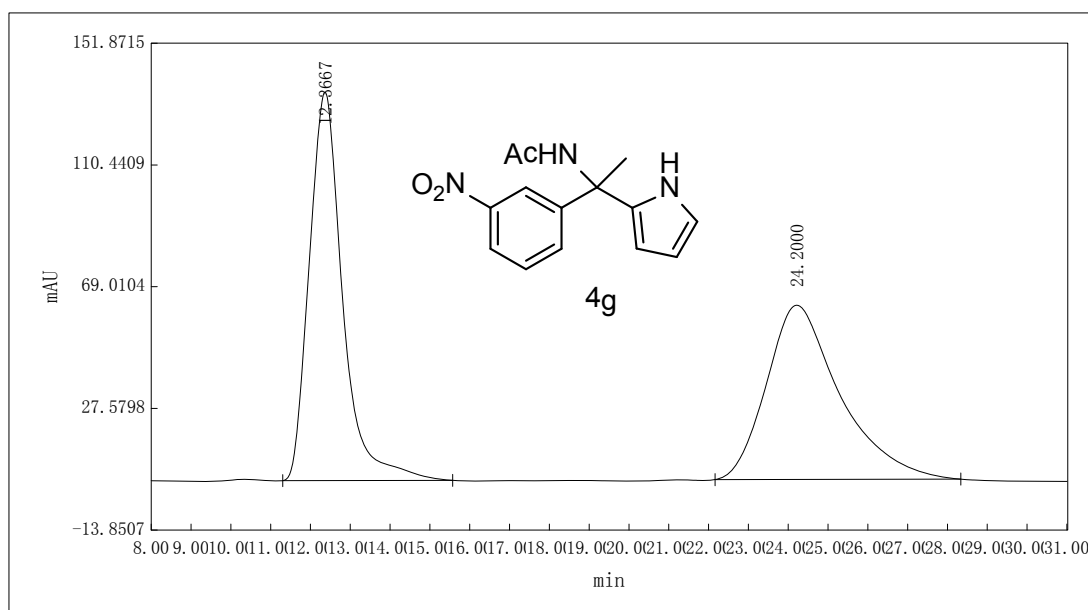

| Peak # | RetTime [min] | Area [mAU*s] | type | Peak width [s] | Area %  |
|--------|---------------|--------------|------|----------------|---------|
| 1      | 12.3667       | 8019.7583    | FF   | 256.0000       | 50.3891 |
| 2      | 24.2000       | 7895.9139    | FF   | 370.0000       | 49.6109 |

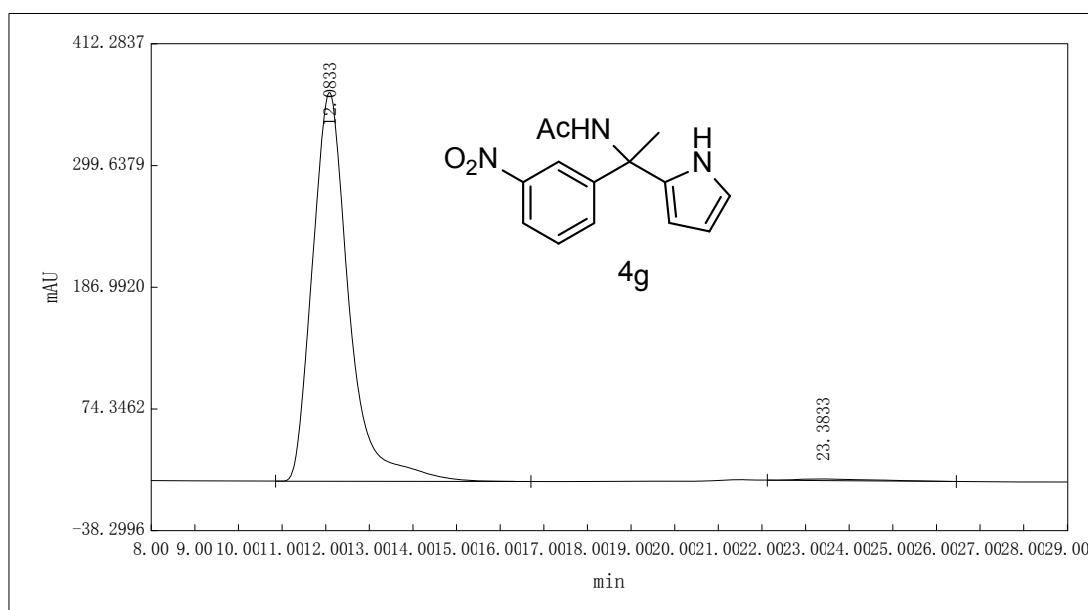

| Peak # | RetTime [min] | Area [mAU*s] | type | Peak width [s] | Area %  |
|--------|---------------|--------------|------|----------------|---------|
| 1      | 12.0833       | 21796.3444   | FF   | 351.0000       | 99.0956 |
| 2      | 23.3833       | 198.9202     | FF   | 260.0000       | 0.9044  |



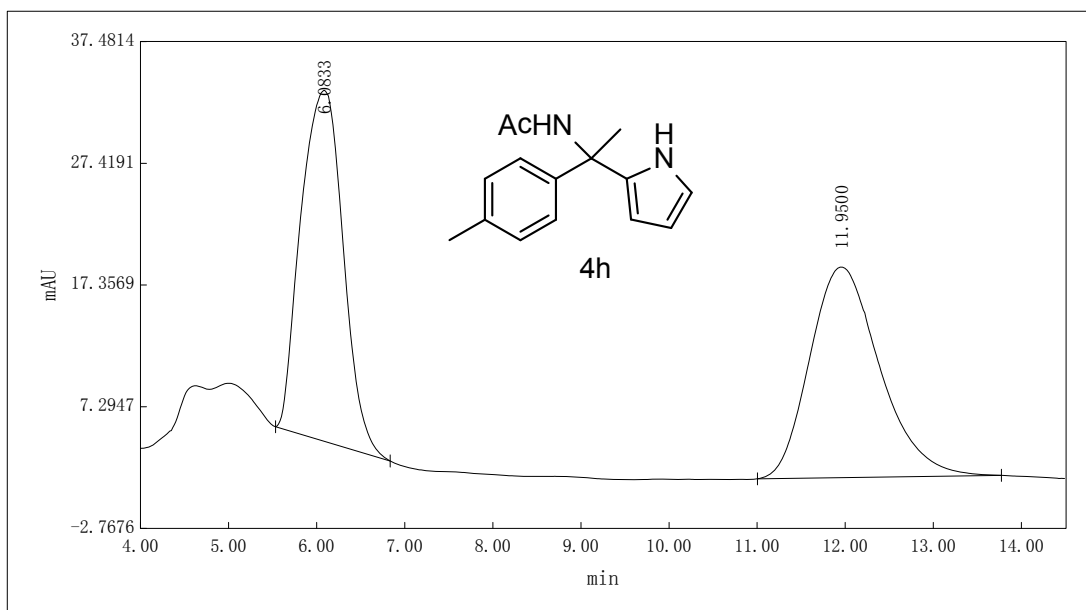

| Peak # | RetTime [min] | Area [mAU*s] | type | Peak width [s] | Area %  |
|--------|---------------|--------------|------|----------------|---------|
| 1      | 6.0833        | 1006.9461    | BB   | 78.0000        | 50.2011 |
| 2      | 11.9500       | 998.8804     | FF   | 166.0000       | 49.7989 |

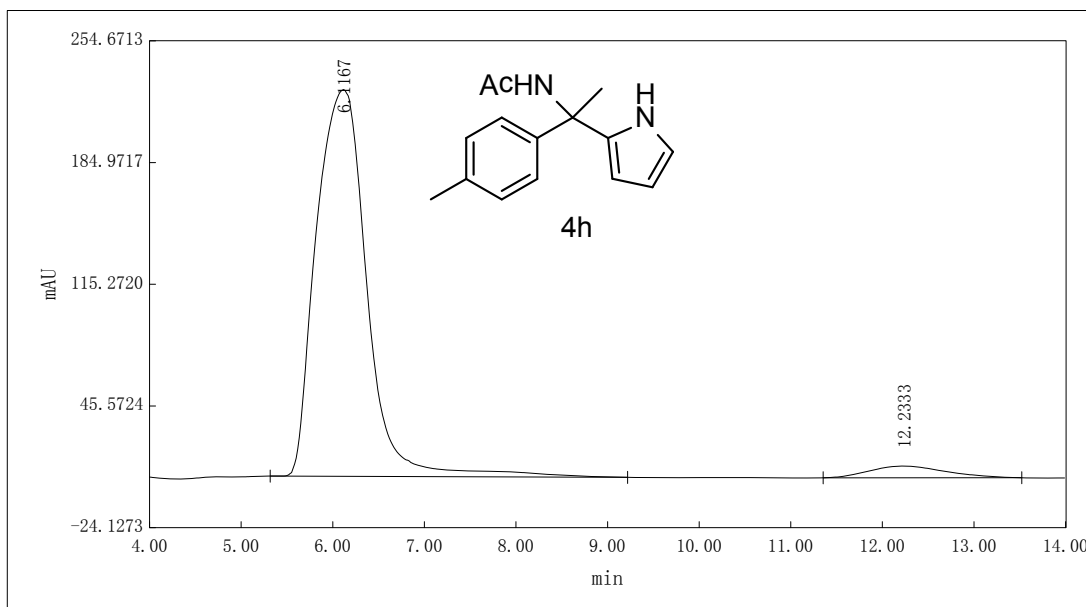

| Peak # | RetTime [min] | Area [mAU*s] | type | Peak width [s] | Area %  |
|--------|---------------|--------------|------|----------------|---------|
| 1      | 6.1167        | 8882.0603    | FF   | 234.0000       | 95.6603 |
| 2      | 12.2333       | 402.9449     | FF   | 130.0000       | 4.3397  |

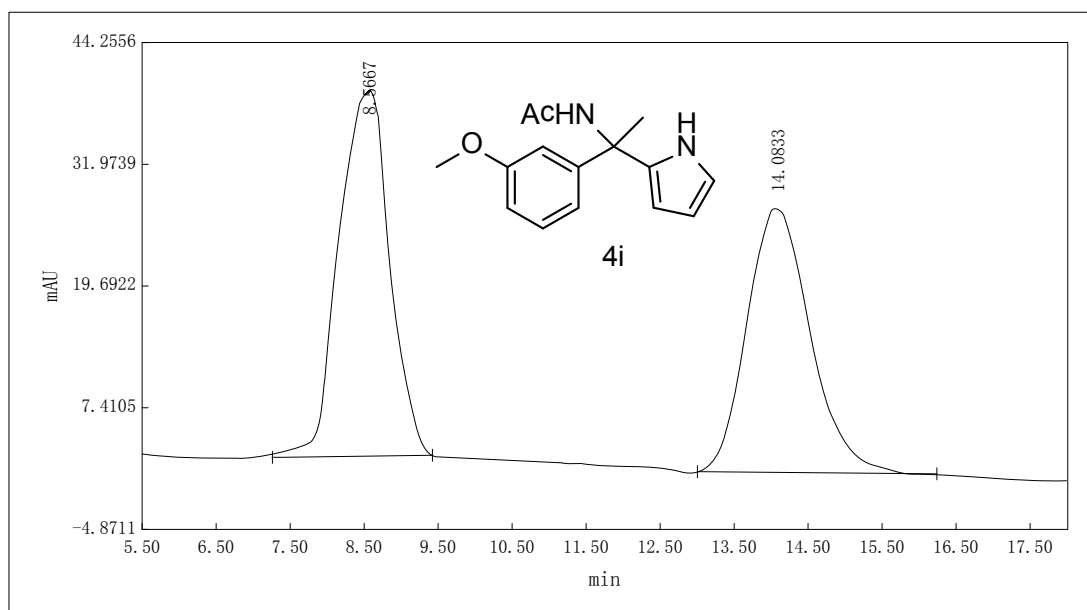

| Peak # | RetTime [min] | Area [mAU*s] | type | Peak width [s] | Area %  |
|--------|---------------|--------------|------|----------------|---------|
| 1      | 8.5667        | 1692.6249    | BB   | 121.0000       | 50.6680 |
| 2      | 14.0833       | 1647.9953    | FF   | 194.0000       | 49.3320 |

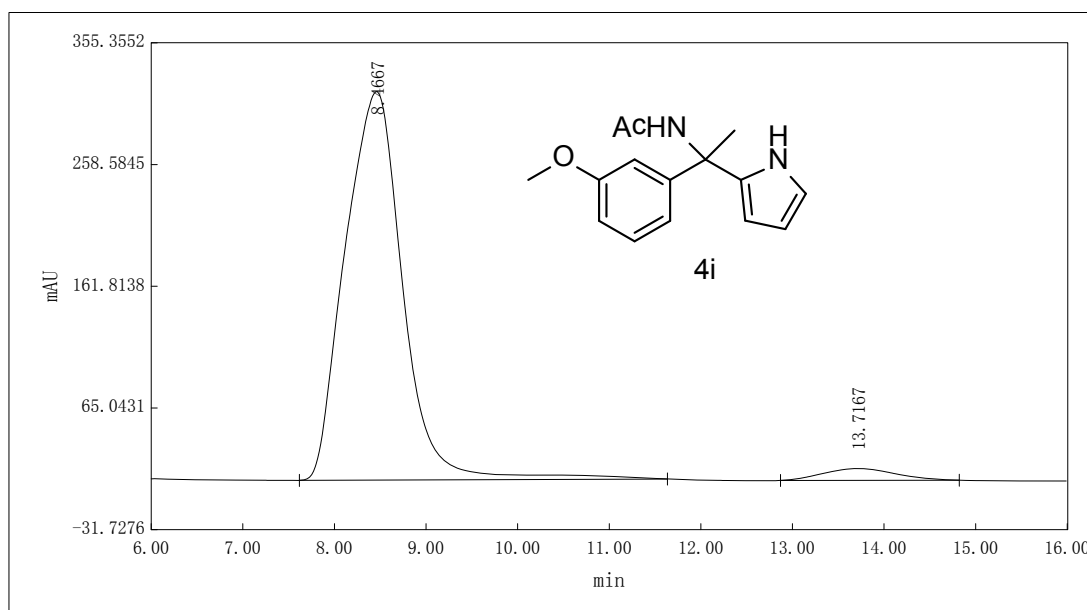

| Peak # | RetTime [min] | Area [mAU*s] | type | Peak width [s] | Area %  |
|--------|---------------|--------------|------|----------------|---------|
| 1      | 8.4667        | 14110.3012   | FF   | 241.0000       | 96.3525 |
| 2      | 13.7167       | 534.1516     | FF   | 117.0000       | 3.6475  |

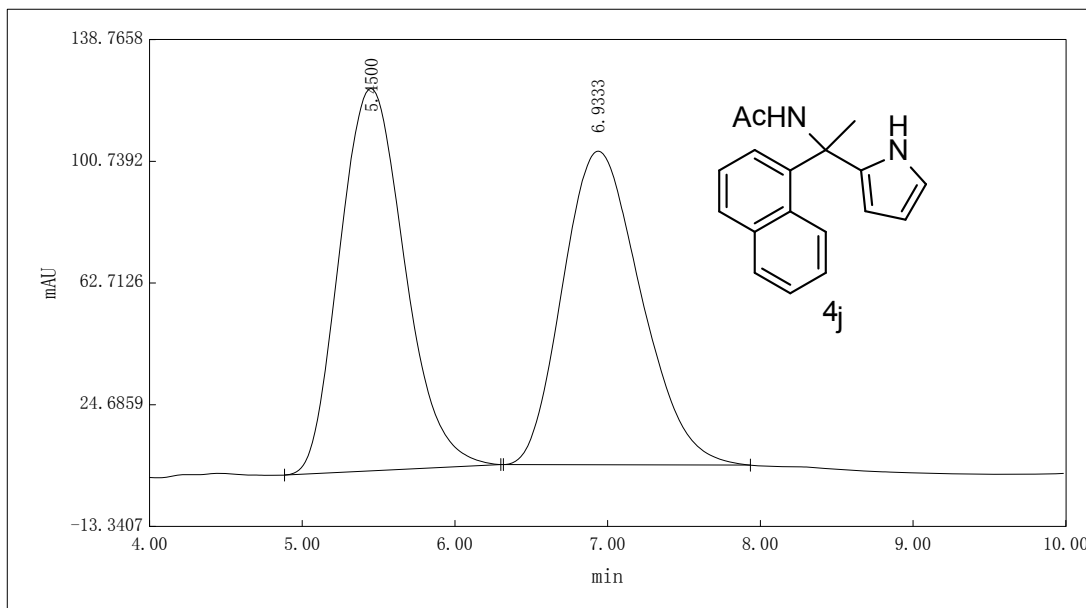

| Peak # | RetTime [min] | Area [mAU*s] | type | Peak width [s] | Area %  |
|--------|---------------|--------------|------|----------------|---------|
| 1      | 5.4500        | 3676.3929    | BB   | 85.0000        | 50.3413 |
| 2      | 6.9333        | 3626.5395    | BB   | 97.0000        | 49.6587 |

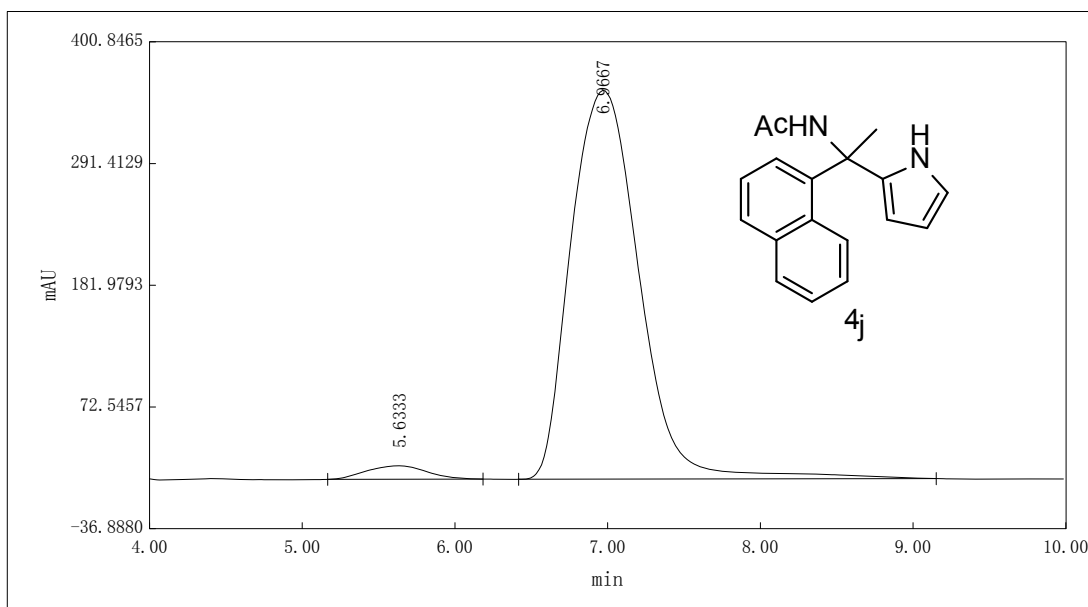

| Peak # | RetTime [min] | Area [mAU*s] | type | Peak width [s] | Area %  |
|--------|---------------|--------------|------|----------------|---------|
| 1      | 5.6333        | 344.6895     | BB   | 61.0000        | 2.9432  |
| 2      | 6.9667        | 11366.8492   | FF   | 164.0000       | 97.0568 |

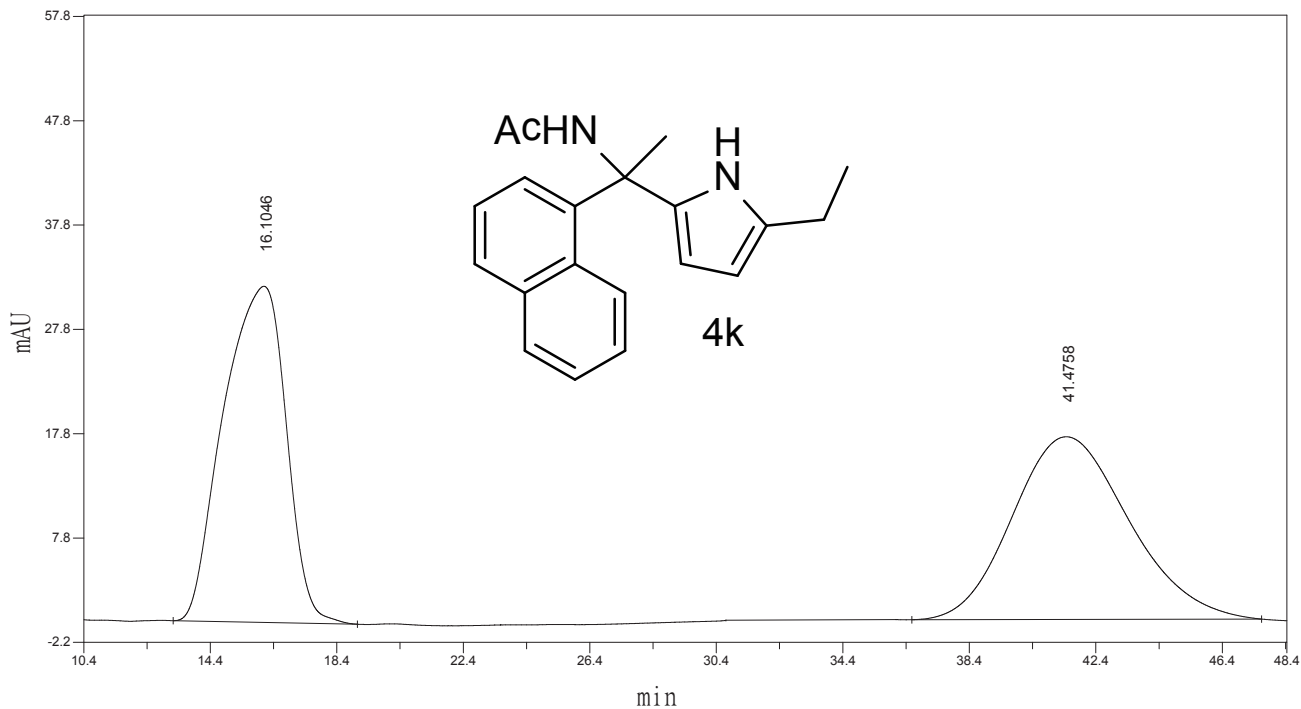

| Peak # | RetTime [min] | Area [mAU*s] | type | Area %  |
|--------|---------------|--------------|------|---------|
| 1      | 16.1046       | 4435.60      | BB   | 49.7584 |
| 2      | 41.4758       | 4478.67      | FF   | 50.2416 |

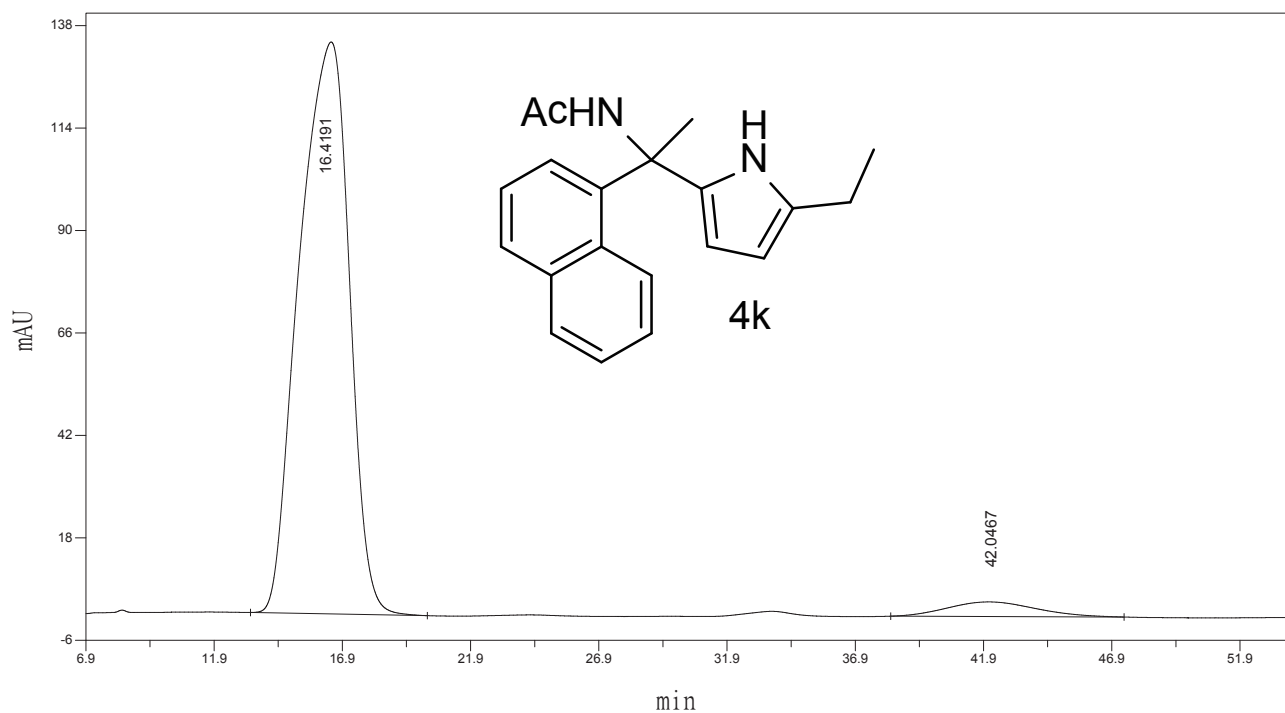

| Peak # | RetTime [min] | Area [mAU*s] | type | Area %  |
|--------|---------------|--------------|------|---------|
| 1      | 16.4191       | 18119.06     | BB   | 95.6555 |
| 2      | 42.0467       | 822.93       | FF   | 4.3445  |

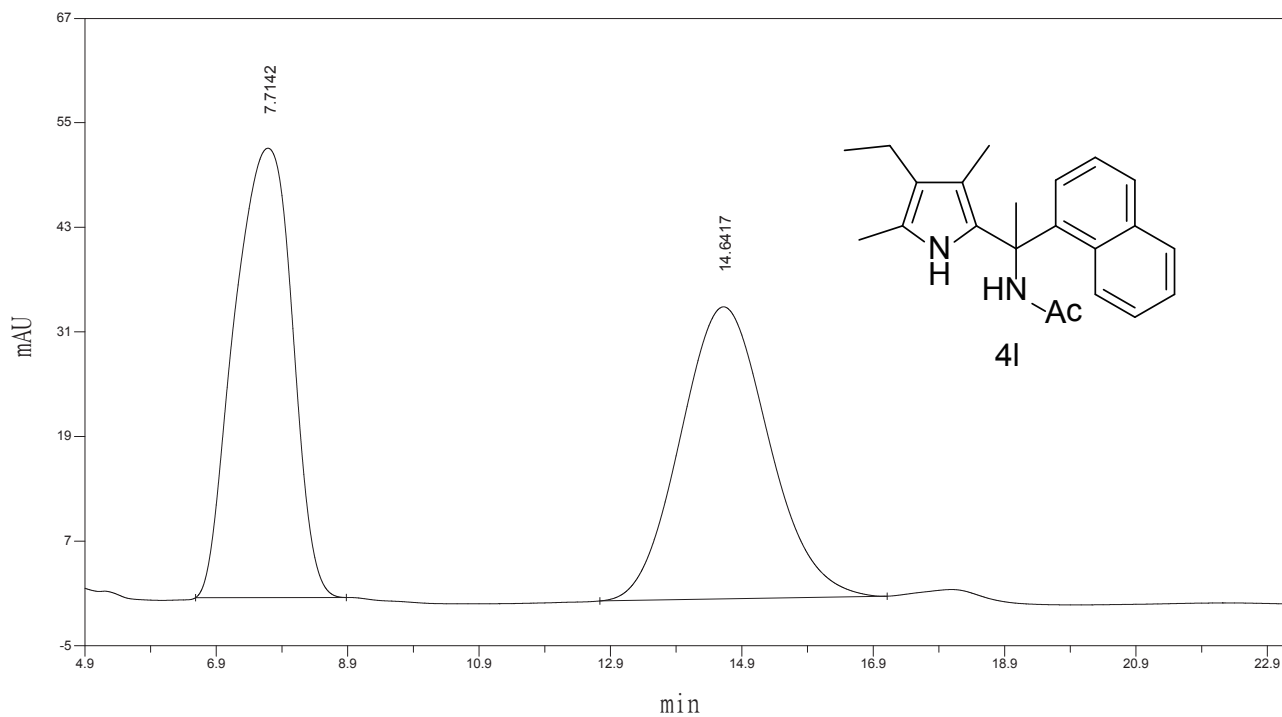

| Peak # | RetTime [min] | Area [mAU*s] | type | Area %  |
|--------|---------------|--------------|------|---------|
| 1      | 7.7142        | 3159.76      | BB   | 50.3210 |
| 2      | 14.6417       | 3119.45      | FF   | 49.6790 |

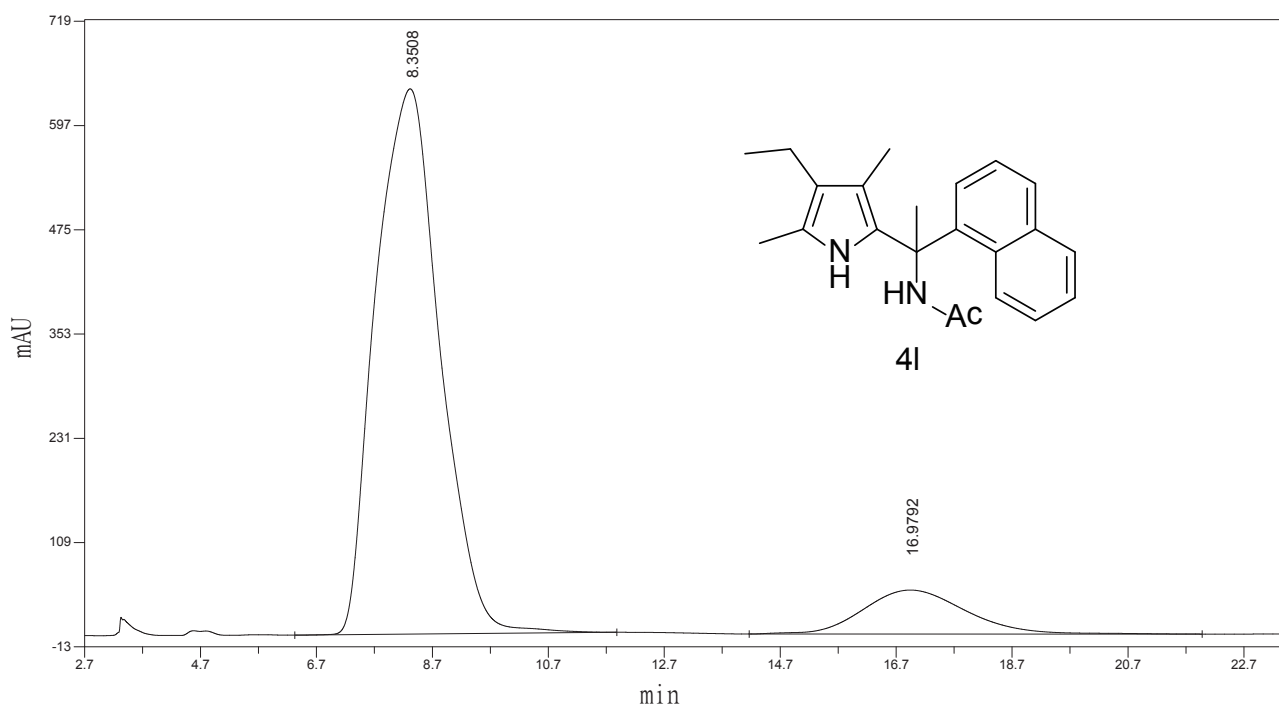

| Peak # | RetTime [min] | Area [mAU*s] | type | Area %  |
|--------|---------------|--------------|------|---------|
| 1      | 8.3508        | 49168.64     | BB   | 88.5291 |
| 2      | 16.9792       | 6370.87      | FF   | 11.4709 |

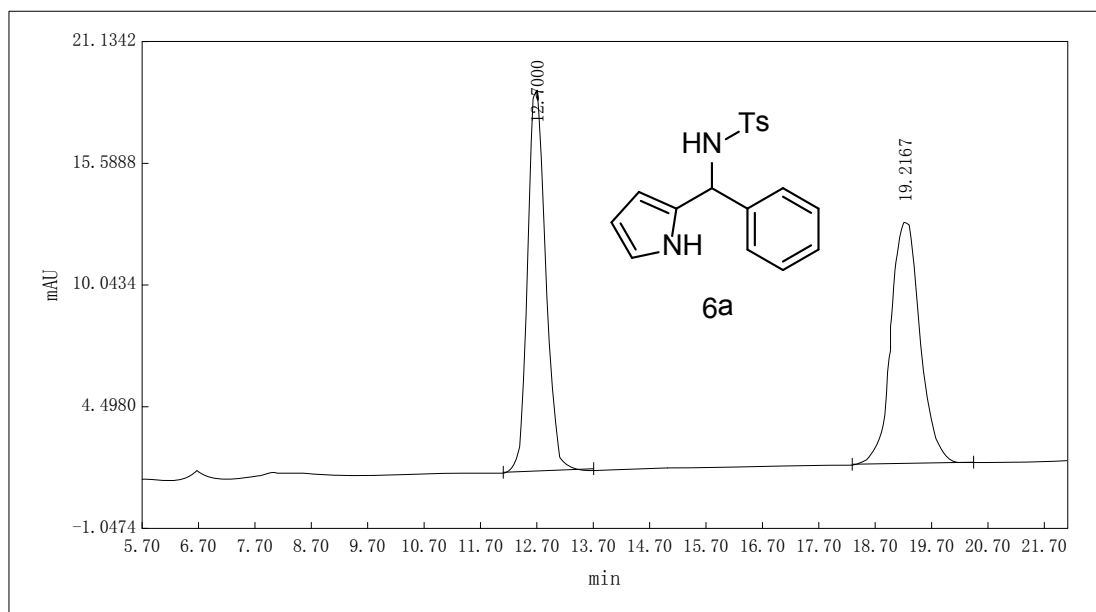

| Peak # | RetTime [min] | Area [mAU*s] | type | Peak width [s] | Area %  |
|--------|---------------|--------------|------|----------------|---------|
| 1      | 12.7000       | 423.9400     | FF   | 96.0000        | 50.1078 |
| 2      | 19.2167       | 422.1161     | FF   | 129.0000       | 49.8922 |

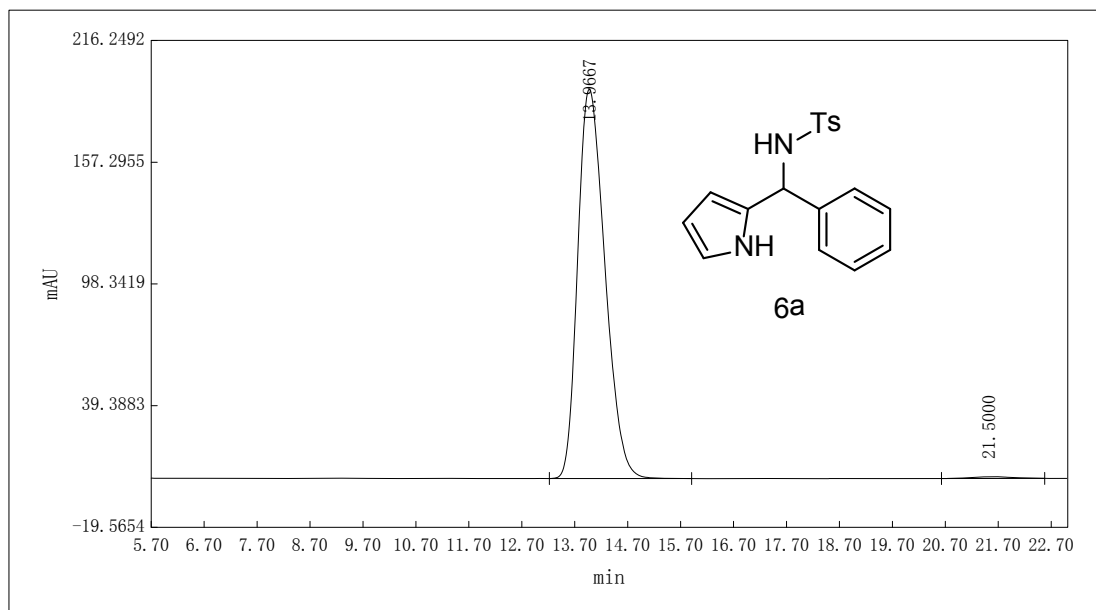

| Peak # | RetTime [min] | Area [mAU*s] | type | Peak width [s] | Area %  |
|--------|---------------|--------------|------|----------------|---------|
| 1      | 13.7667       | 4305.0681    | BB   | 78.0000        | 99.2954 |
| 2      | 21.3500       | 30.5486      | FF   | 69.0000        | 0.7046  |

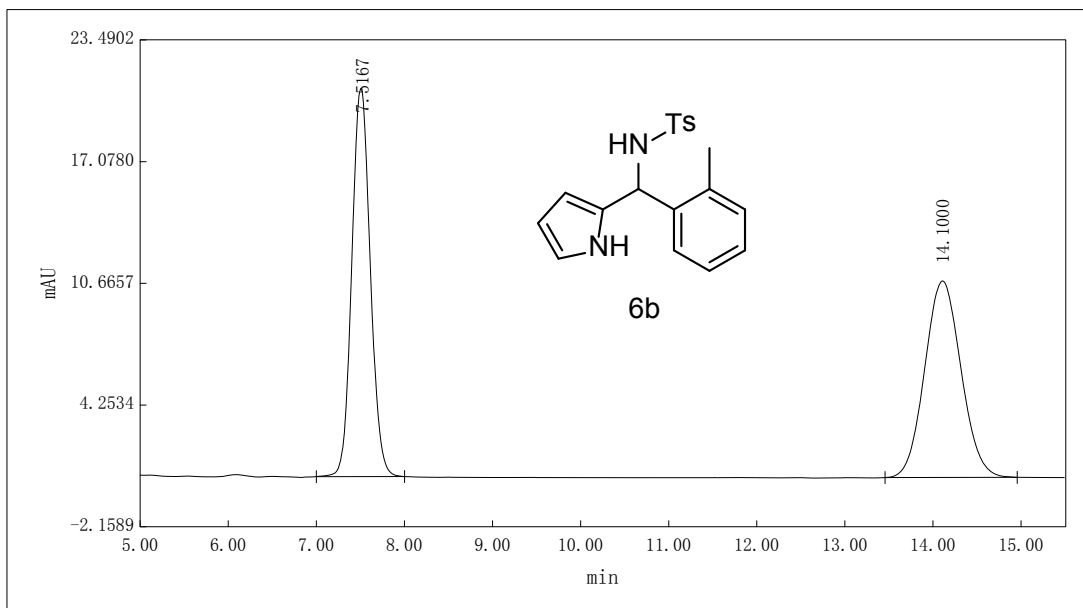

| Peak # | RetTime [min] | Area [mAU*s] | type | Peak width [s] | Area %  |
|--------|---------------|--------------|------|----------------|---------|
| 1      | 7.5167        | 310.2642     | FF   | 60.0000        | 50.1424 |
| 2      | 14.1000       | 308.5023     | FF   | 90.0000        | 49.8576 |

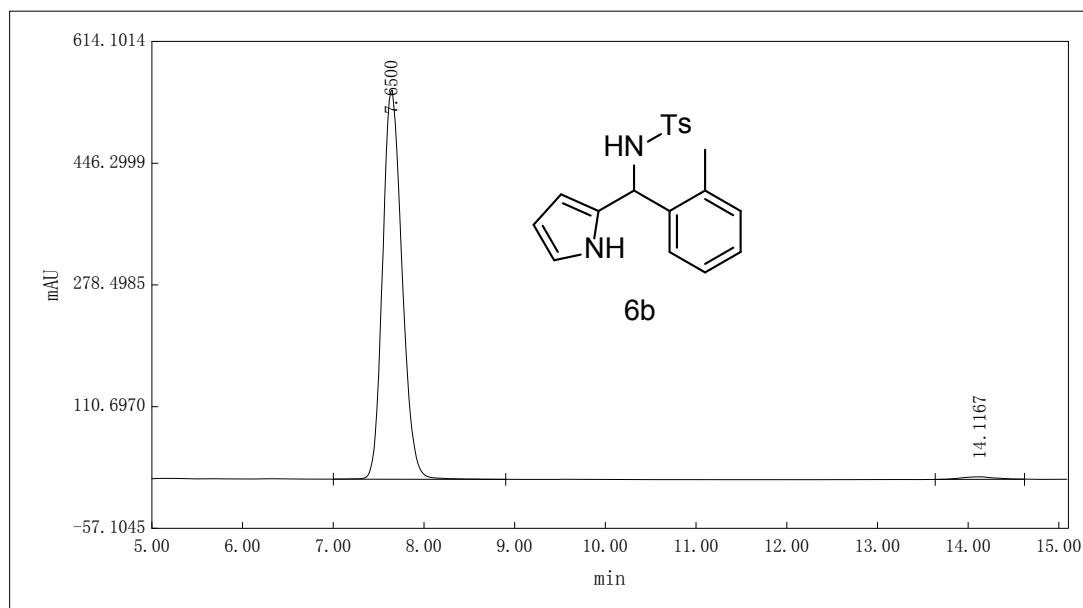

| Peak # | RetTime [min] | Area [mAU*s] | type | Peak width [s] | Area %  |
|--------|---------------|--------------|------|----------------|---------|
| 1      | 7.6500        | 8310.3791    | FF   | 114.0000       | 98.8526 |
| 2      | 14.1167       | 96.4620      | FF   | 59.0000        | 1.1474  |

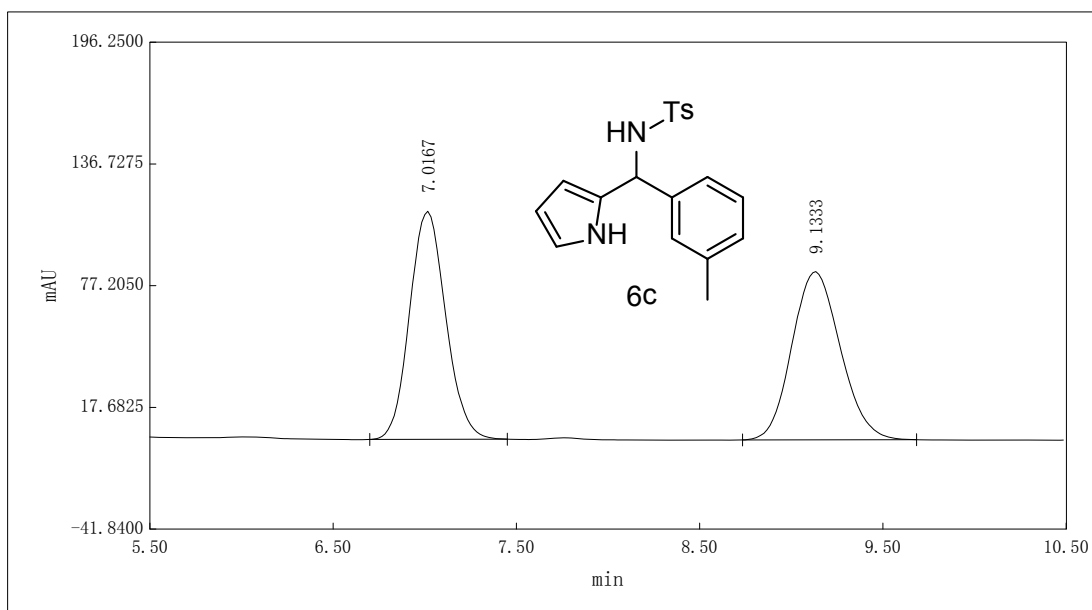

| Peak # | RetTime [min] | Area [mAU*s] | type | Peak width [s] | Area %  |
|--------|---------------|--------------|------|----------------|---------|
| 1      | 7.0167        | 1529.4819    | BB   | 45.0000        | 50.3440 |
| 2      | 9.1333        | 1508.5797    | BB   | 57.0000        | 49.6560 |

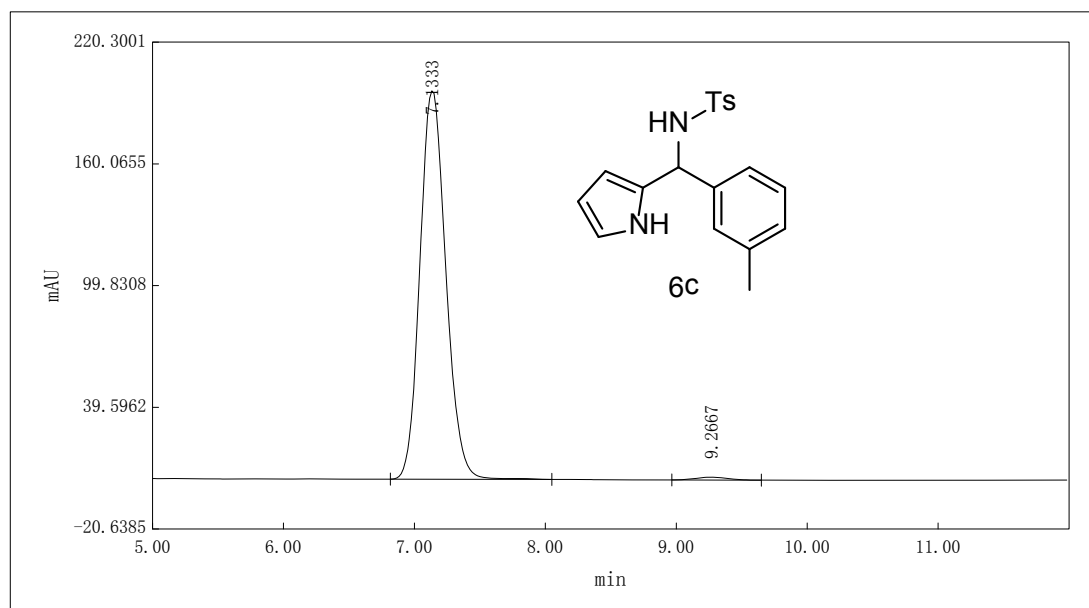

| Peak # | RetTime [min] | Area [mAU*s] | type | Peak width [s] | Area %  |
|--------|---------------|--------------|------|----------------|---------|
| 1      | 7.1333        | 2759.6622    | FF   | 74.0000        | 99.0940 |
| 2      | 9.2667        | 25.2319      | FF   | 41.0000        | 0.9060  |



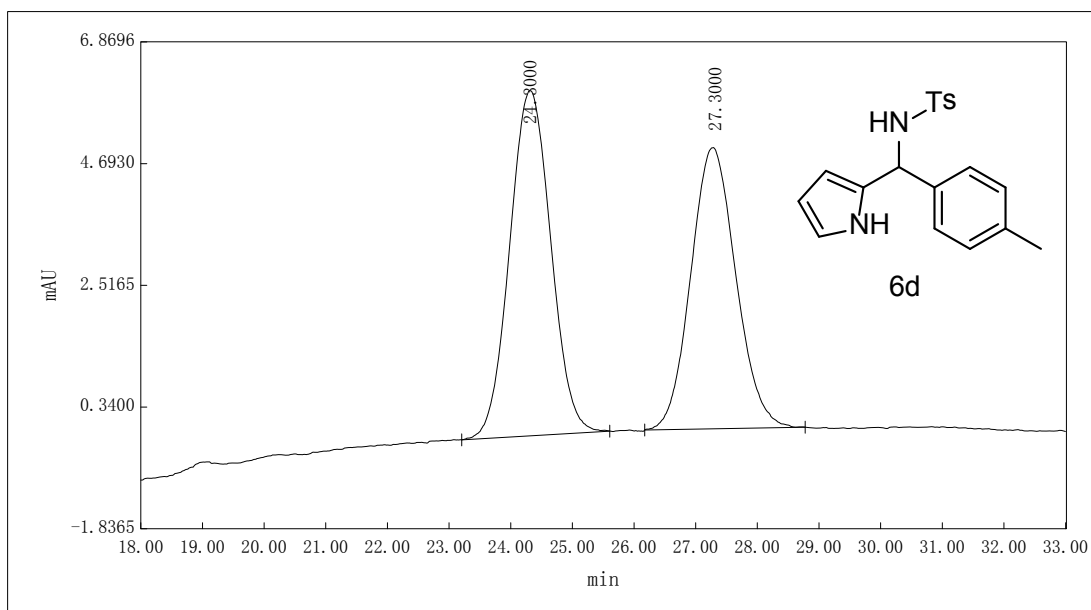

| Peak # | RetTime [min] | Area [mAU*s] | type | Peak width [s] | Area %  |
|--------|---------------|--------------|------|----------------|---------|
| 1      | 24.3000       | 297.9284     | FF   | 144.0000       | 52.8605 |
| 2      | 27.3000       | 265.6846     | FF   | 156.0000       | 47.1395 |

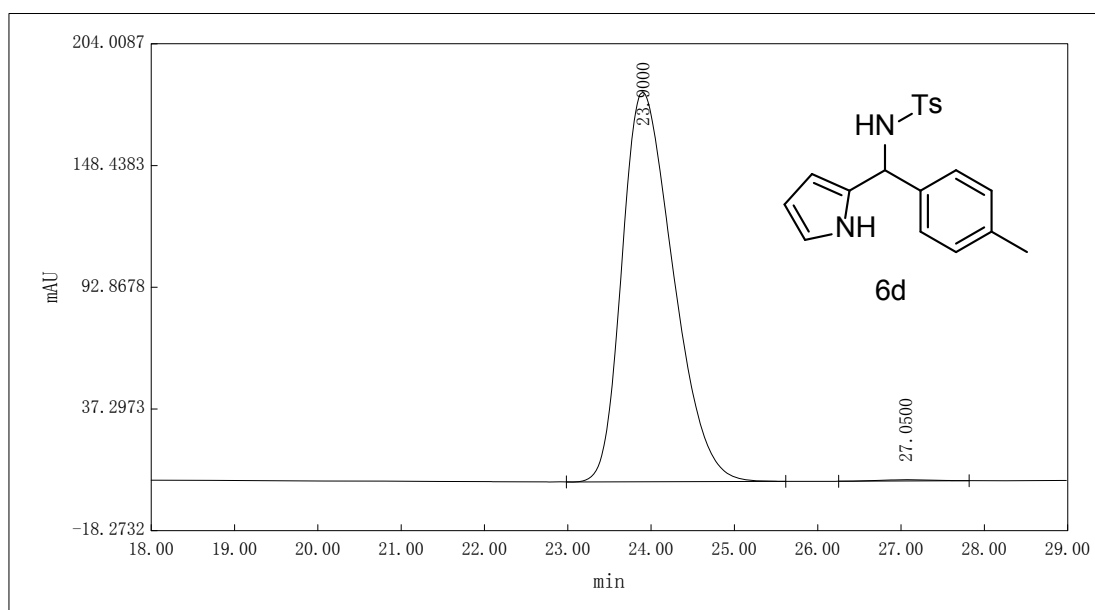

| Peak # | RetTime [min] | Area [mAU*s] | type | Peak width [s] | Area %  |
|--------|---------------|--------------|------|----------------|---------|
| 1      | 23.9000       | 7895.0508    | FF   | 158.0000       | 99.6514 |
| 2      | 27.0500       | 27.6208      | FF   | 94.0000        | 0.3486  |

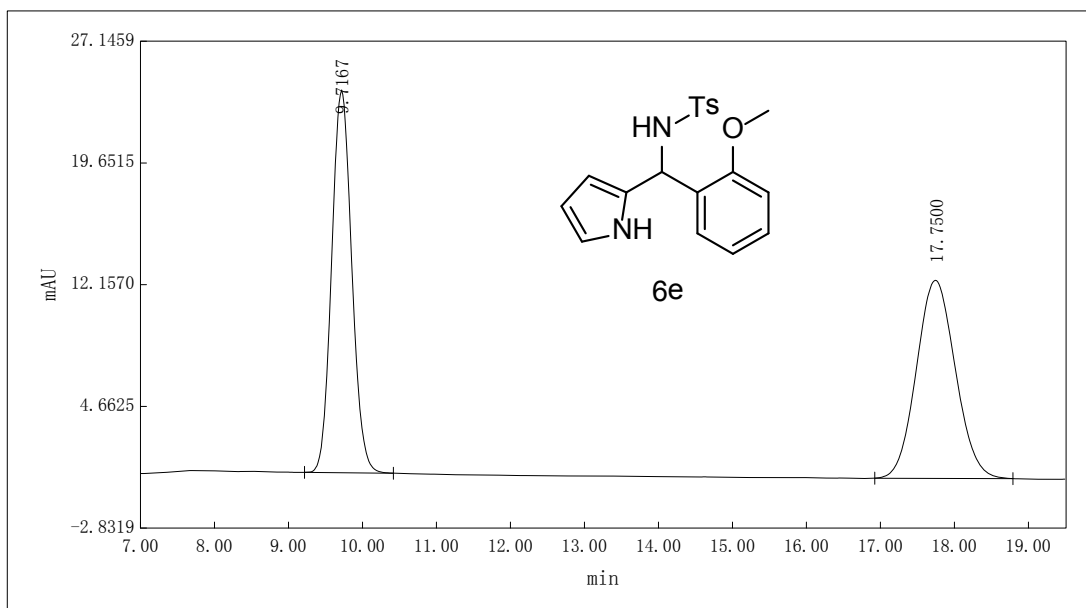

| Peak # | RetTime [min] | Area [mAU*s] | type | Peak width [s] | Area %  |
|--------|---------------|--------------|------|----------------|---------|
| 1      | 9.7167        | 463.4055     | FF   | 72.0000        | 49.9806 |
| 2      | 17.7500       | 463.7656     | FF   | 112.0000       | 50.0194 |

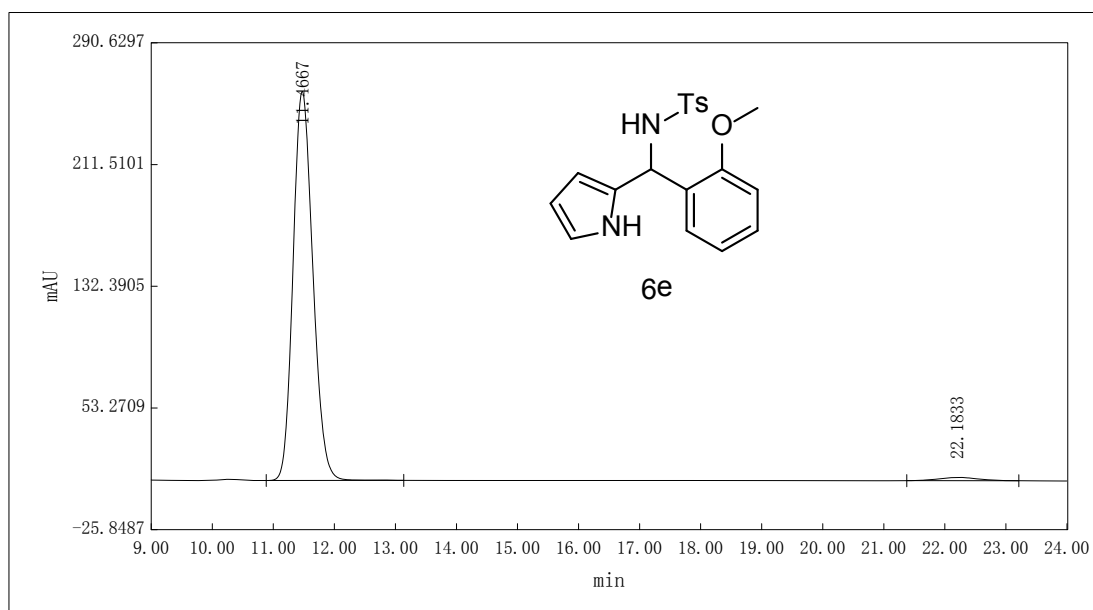

| Peak # | RetTime [min] | Area [mAU*s] | type | Peak width [s] | Area %  |
|--------|---------------|--------------|------|----------------|---------|
| 1      | 11.4667       | 5926.0362    | FF   | 135.0000       | 98.3337 |
| 2      | 22.1833       | 100.4173     | FF   | 110.0000       | 1.6663  |

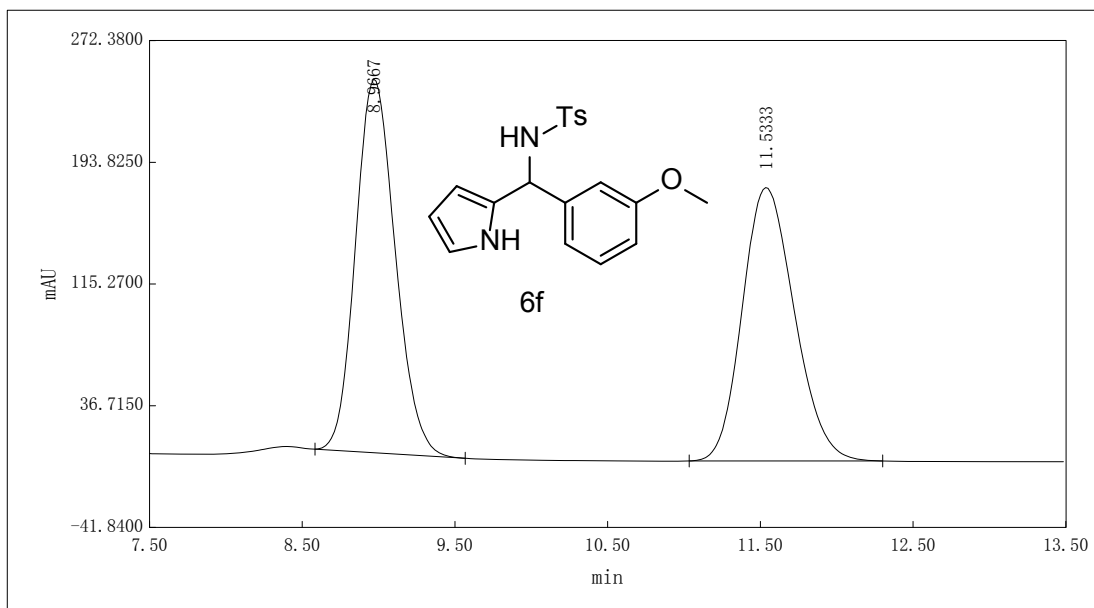

| Peak # | RetTime [min] | Area [mAU*s] | type | Peak width [s] | Area %  |
|--------|---------------|--------------|------|----------------|---------|
| 1      | 8.9667        | 4348.6797    | BB   | 59.0000        | 50.9795 |
| 2      | 11.5333       | 4181.5766    | BB   | 76.0000        | 49.0205 |

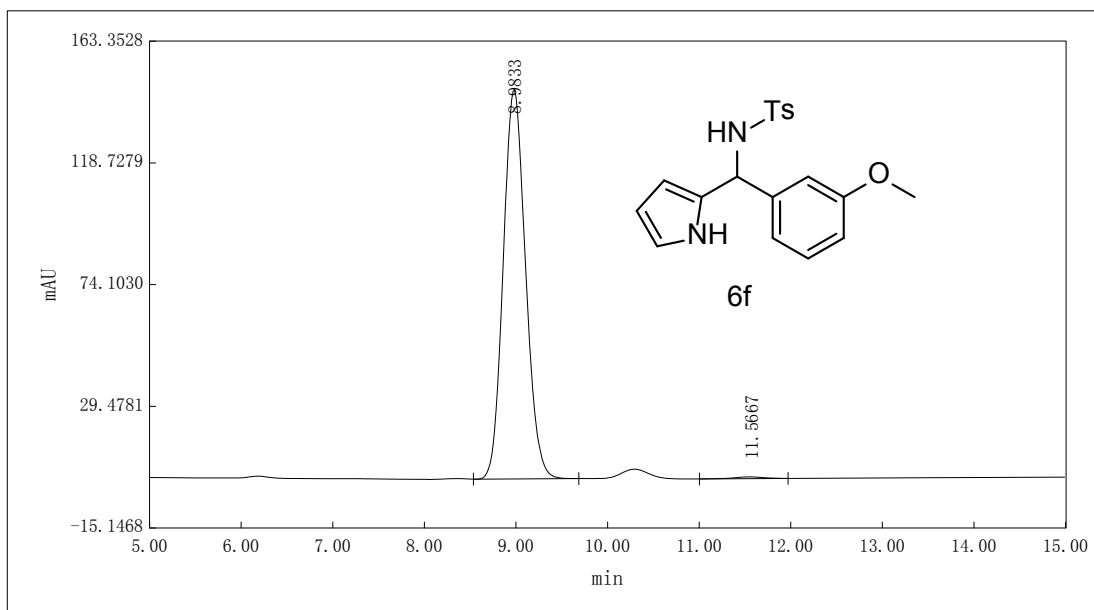

| Peak # | RetTime [min] | Area [mAU*s] | type | Peak width [s] | Area %  |
|--------|---------------|--------------|------|----------------|---------|
| 1      | 8.9833        | 2516.2268    | FF   | 69.0000        | 99.4132 |
| 2      | 11.5667       | 14.8535      | FF   | 58.0000        | 0.5868  |

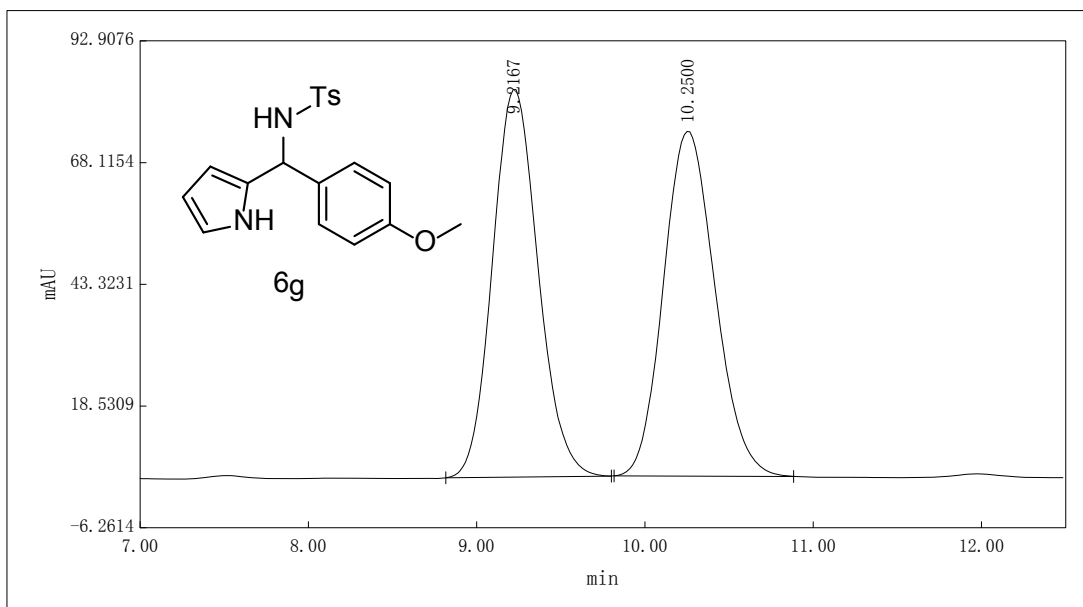

| Peak # | RetTime [min] | Area [mAU*s] | type | Peak width [s] | Area %  |
|--------|---------------|--------------|------|----------------|---------|
| 1      | 9.2167        | 1549.3971    | BB   | 59.0000        | 49.9038 |
| 2      | 10.2500       | 1555.3695    | BB   | 64.0000        | 50.0962 |

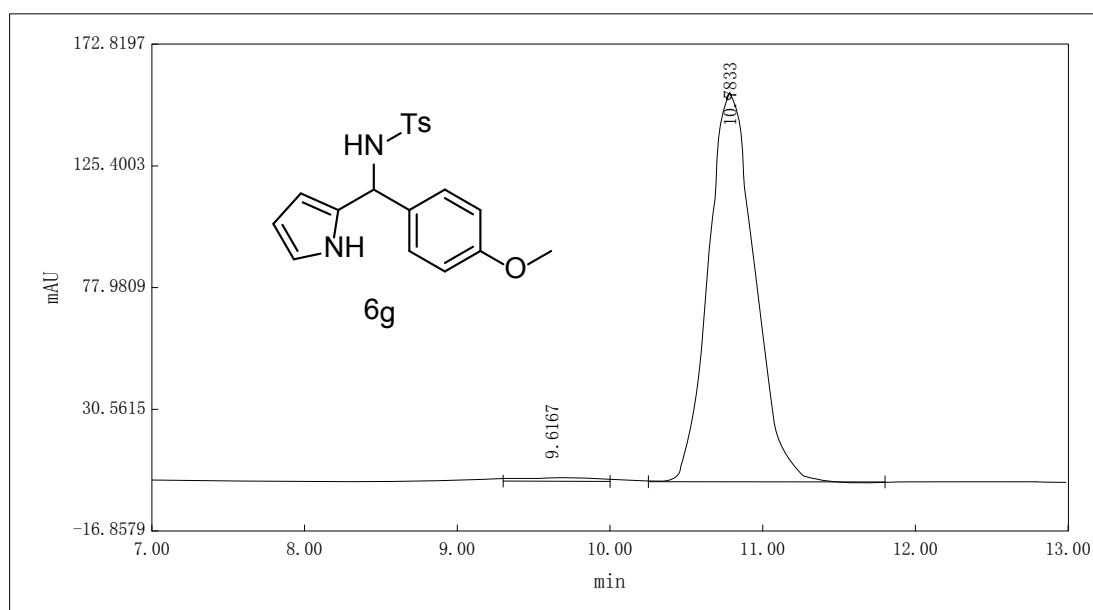

| Peak # | RetTime [min] | Area [mAU*s] | type | Peak width [s] | Area %  |
|--------|---------------|--------------|------|----------------|---------|
| 1      | 9.6167        | 34.5541      | FF   | 42.0000        | 1.0226  |
| 2      | 10.7833       | 3344.5947    | FF   | 93.0000        | 98.9774 |

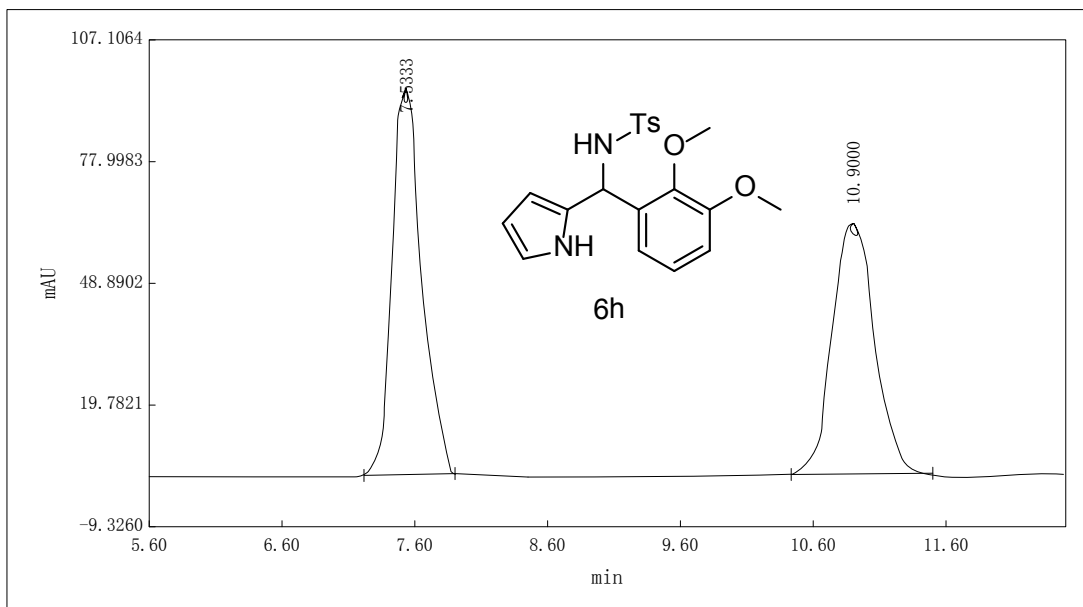

| Peak # | RetTime [min] | Area [mAU*s] | type | Peak width [s] | Area %  |
|--------|---------------|--------------|------|----------------|---------|
| 1      | 7.5333        | 1314.6259    | BB   | 37.0000        | 48.4488 |
| 2      | 10.9000       | 1398.8092    | BB   | 64.0000        | 51.5512 |

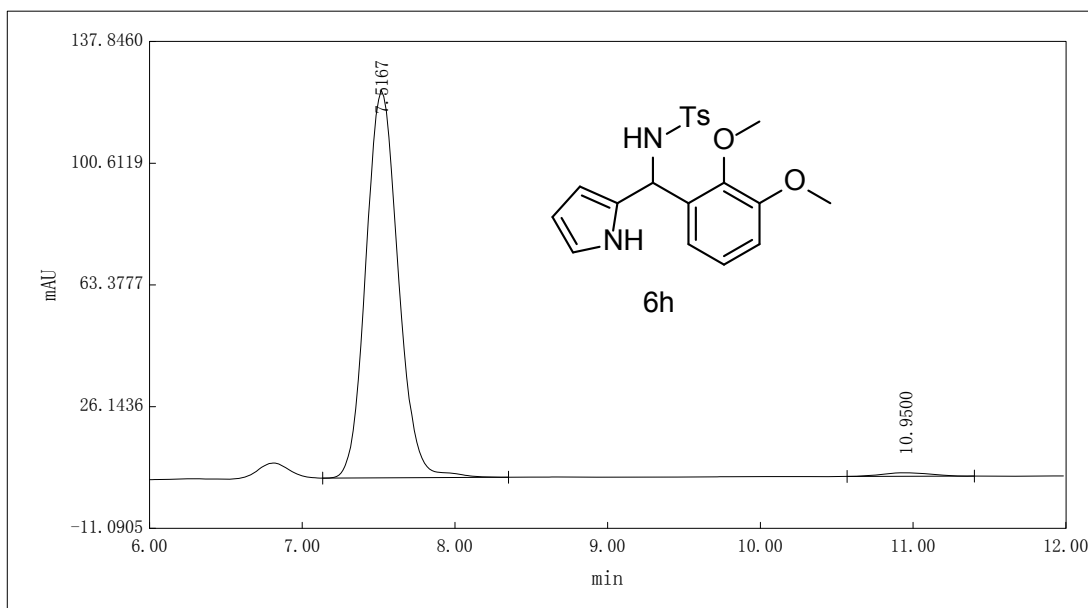

| Peak # | RetTime [min] | Area [mAU*s] | type | Peak width [s] | Area %  |
|--------|---------------|--------------|------|----------------|---------|
| 1      | 7.5167        | 1814.8695    | FF   | 73.0000        | 98.6311 |
| 2      | 10.9500       | 25.1890      | FF   | 50.0000        | 1.3689  |

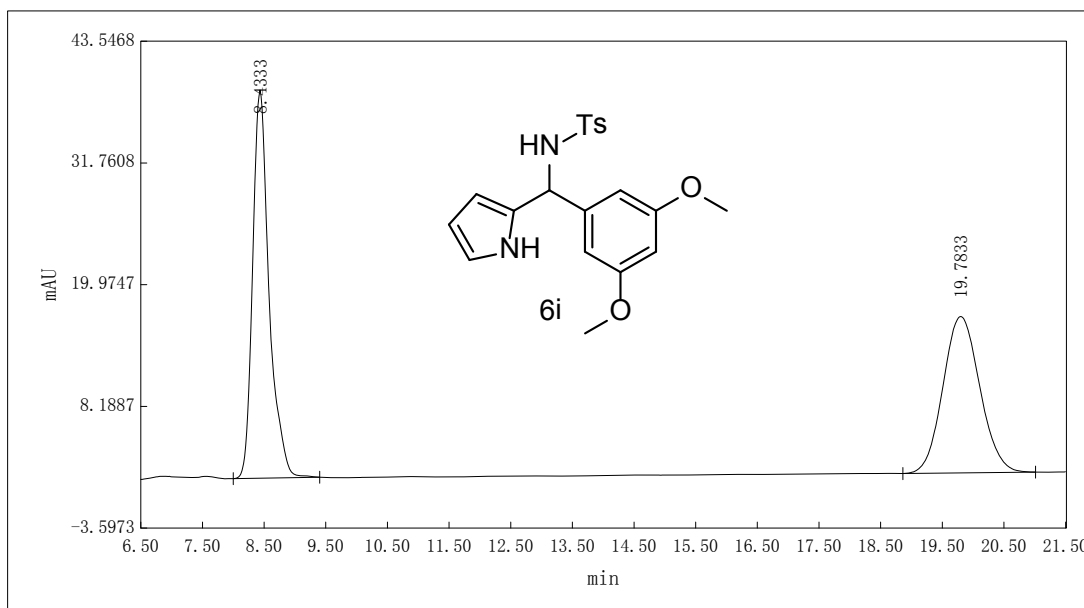

| Peak # | RetTime [min] | Area [mAU*s] | type | Peak width [s] | Area %  |
|--------|---------------|--------------|------|----------------|---------|
| 1      | 8.4333        | 724.0309     | FF   | 84.0000        | 52.5378 |
| 2      | 19.7833       | 654.0835     | FF   | 129.0000       | 47.4622 |

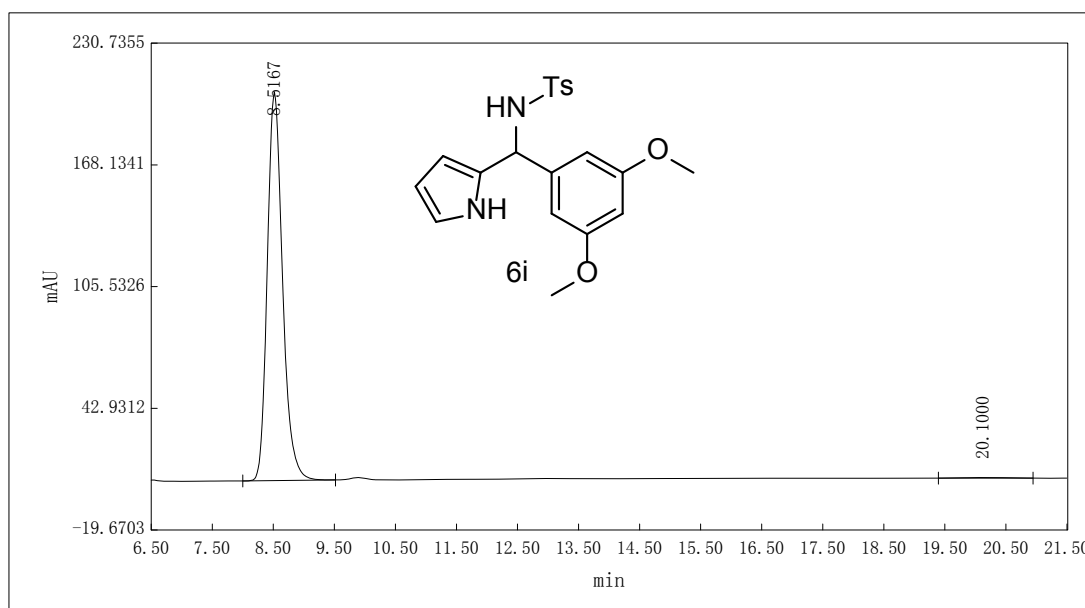

| Peak # | RetTime [min] | Area [mAU*s] | type | Peak width [s] | Area %  |
|--------|---------------|--------------|------|----------------|---------|
| 1      | 8.5167        | 3607.8903    | FF   | 91.0000        | 99.5713 |
| 2      | 20.1000       | 15.5354      | FF   | 93.0000        | 0.4287  |

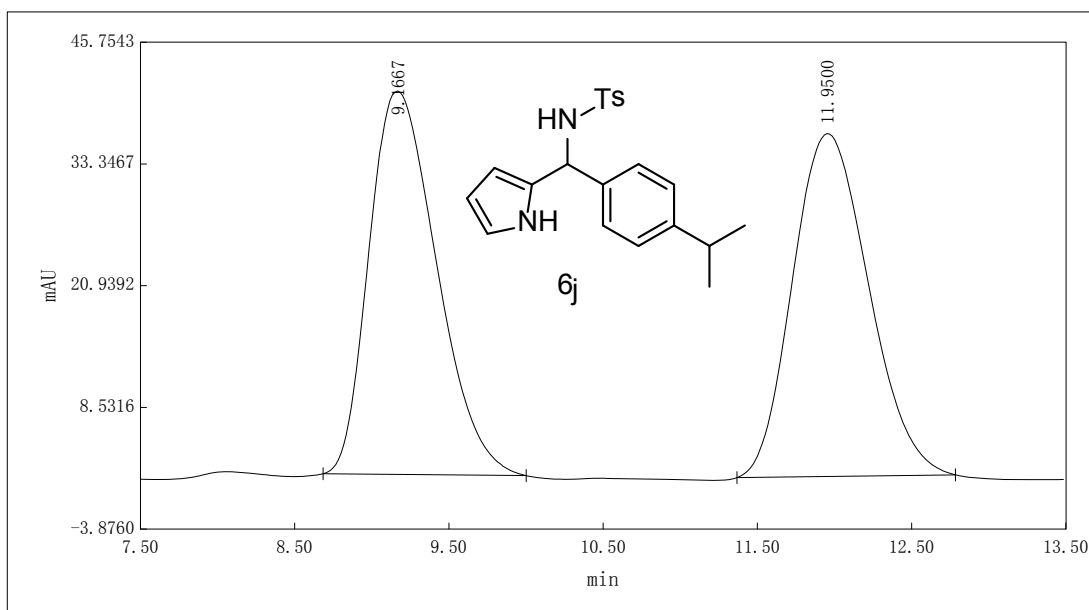

| Peak # | RetTime [min] | Area [mAU*s] | type | Peak width [s] | Area %  |
|--------|---------------|--------------|------|----------------|---------|
| 1      | 9.1667        | 1240.2820    | BB   | 79.0000        | 49.8624 |
| 2      | 11.9500       | 1247.1294    | BB   | 85.0000        | 50.1376 |

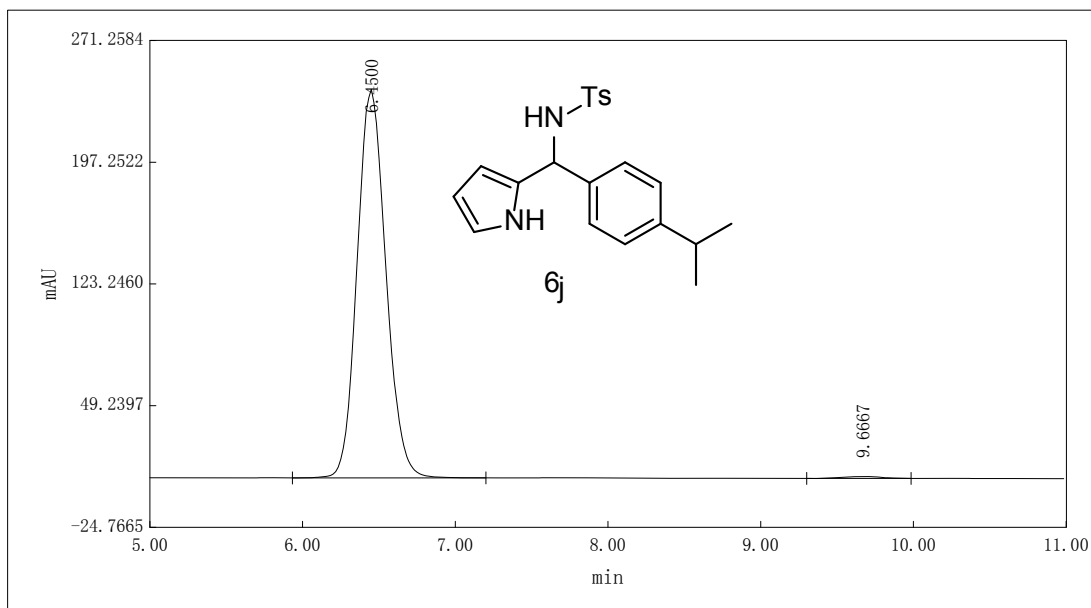

| Peak # | RetTime [min] | Area [mAU*s] | type | Peak width [s] | Area %  |
|--------|---------------|--------------|------|----------------|---------|
| 1      | 6.4500        | 3218.1324    | FF   | 76.0000        | 99.3869 |
| 2      | 9.6667        | 19.8508      | FF   | 41.0000        | 0.6131  |

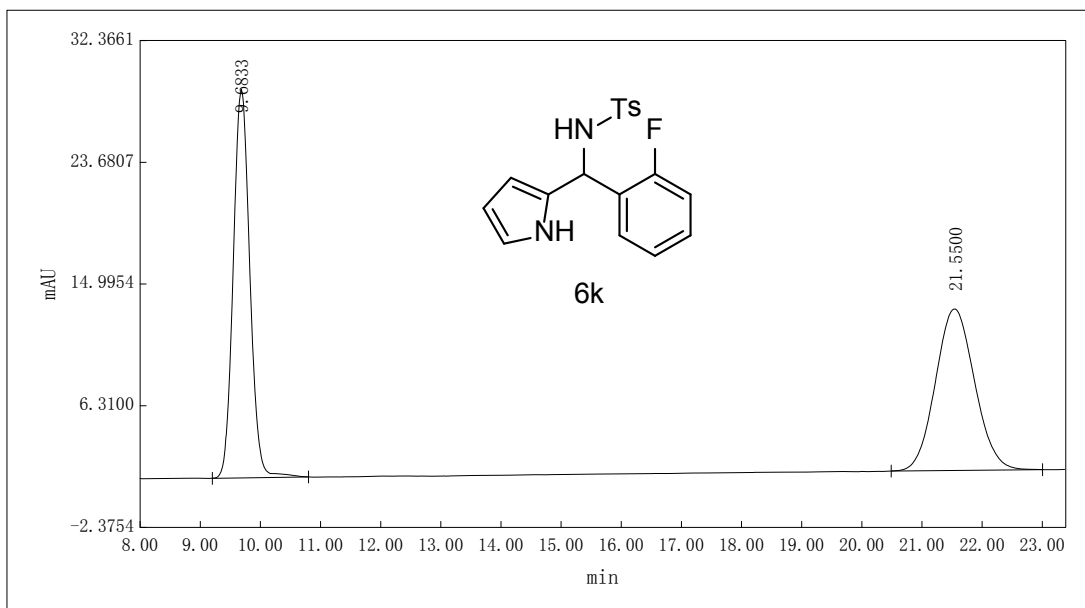

| Peak # | RetTime [min] | Area [mAU*s] | type | Peak width [s] | Area %  |
|--------|---------------|--------------|------|----------------|---------|
| 1      | 9.6833        | 552.2262     | FF   | 96.0000        | 50.4667 |
| 2      | 21.5500       | 542.0123     | FF   | 151.0000       | 49.5333 |

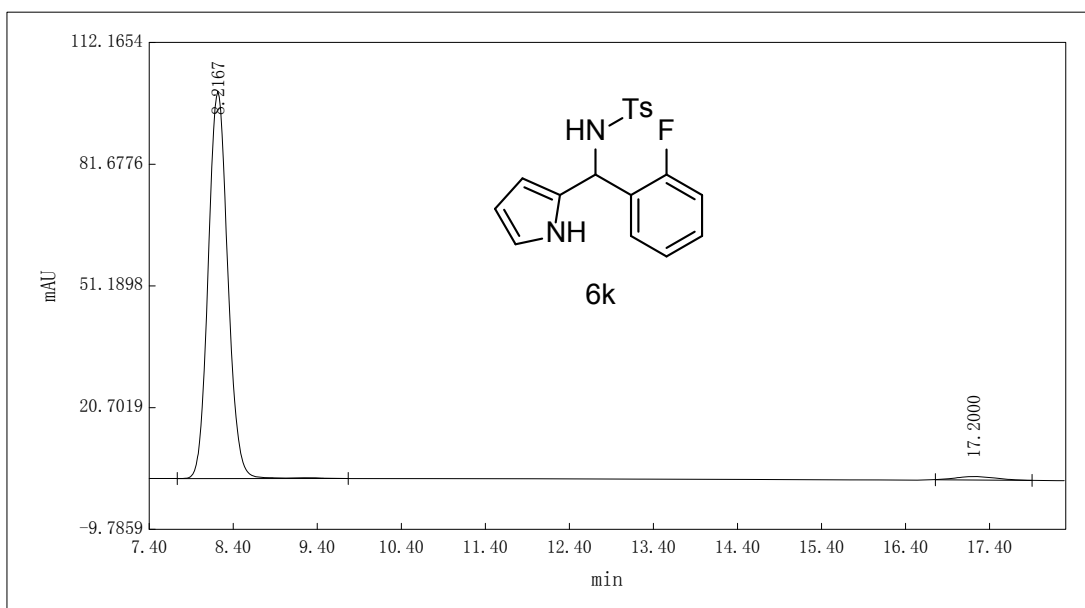

| Peak # | RetTime [min] | Area [mAU*s] | type | Peak width [s] | Area %  |
|--------|---------------|--------------|------|----------------|---------|
| 1      | 8.2167        | 1628.6571    | FF   | 122.0000       | 98.2355 |
| 2      | 17.2000       | 29.2540      | FF   | 69.0000        | 1.7645  |



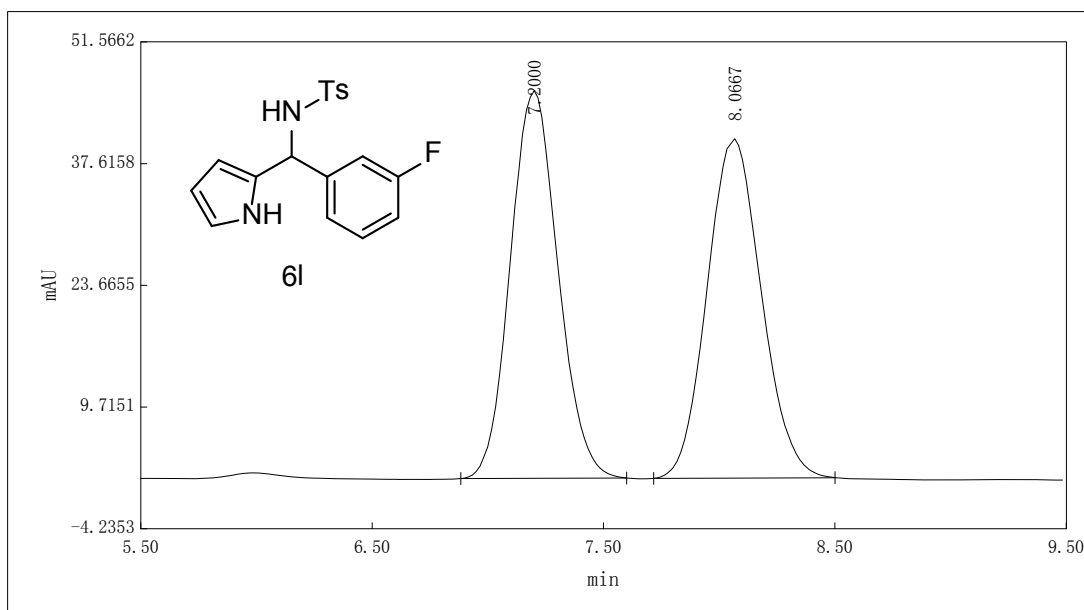

| Peak # | RetTime [min] | Area [mAU*s] | type | Peak width [s] | Area %  |
|--------|---------------|--------------|------|----------------|---------|
| 1      | 7.2000        | 662.3114     | BB   | 43.0000        | 50.1193 |
| 2      | 8.0667        | 659.1571     | BB   | 47.0000        | 49.8807 |

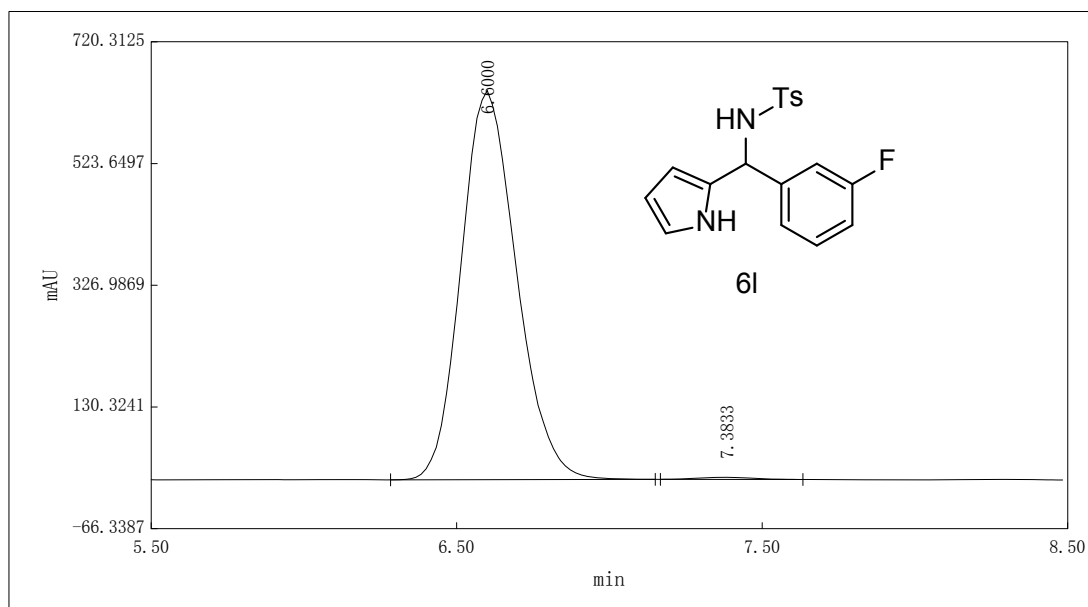

| Peak # | RetTime [min] | Area [mAU*s] | type | Peak width [s] | Area %  |
|--------|---------------|--------------|------|----------------|---------|
| 1      | 6.6000        | 8245.2907    | BB   | 52.0000        | 99.4740 |
| 2      | 7.3833        | 43.5973      | BB   | 28.0000        | 0.5260  |

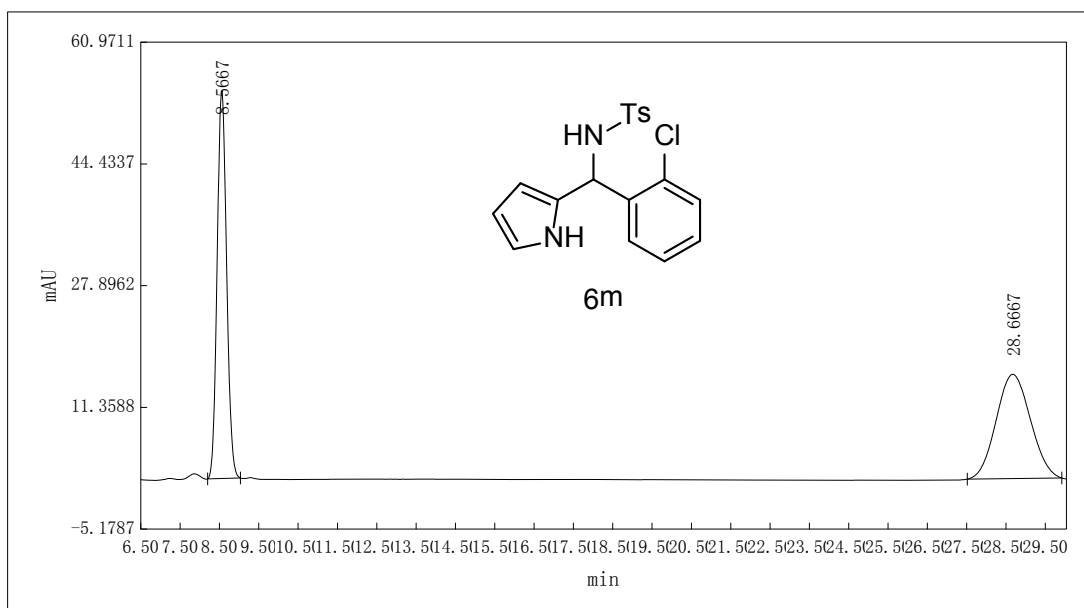

| Peak # | RetTime [min] | Area [mAU*s] | type | Peak width [s] | Area %  |
|--------|---------------|--------------|------|----------------|---------|
| 1      | 8.5667        | 920.5383     | BB   | 50.0000        | 50.7761 |
| 2      | 28.6667       | 892.3977     | FF   | 144.0000       | 49.2239 |

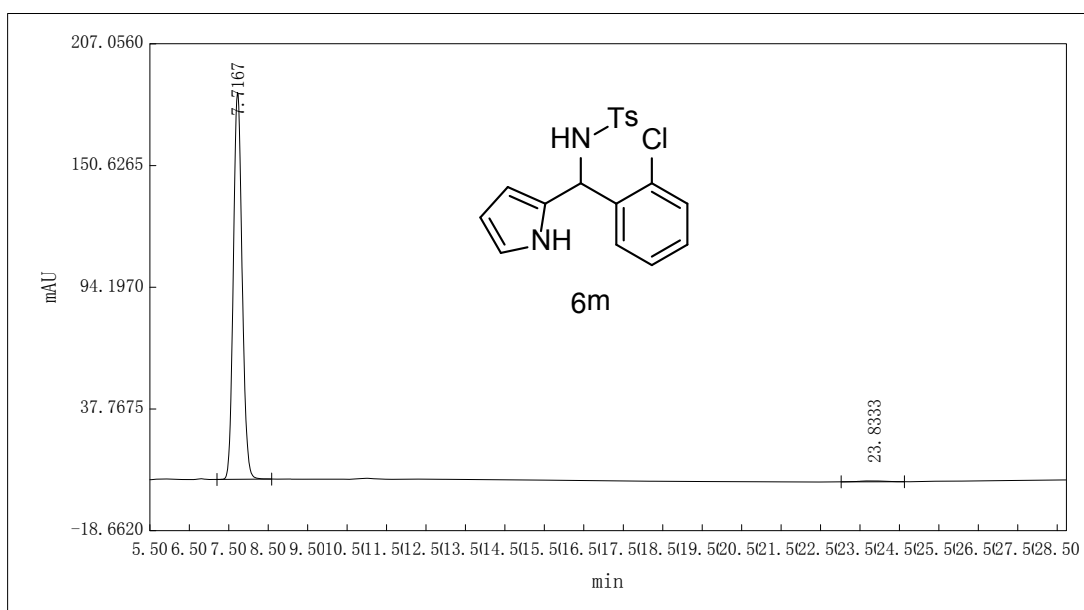

| Peak # | RetTime [min] | Area [mAU*s] | type | Peak width [s] | Area %  |
|--------|---------------|--------------|------|----------------|---------|
| 1      | 7.7167        | 2893.3366    | FF   | 83.0000        | 99.3606 |
| 2      | 23.8333       | 18.6181      | BB   | 96.0000        | 0.6394  |

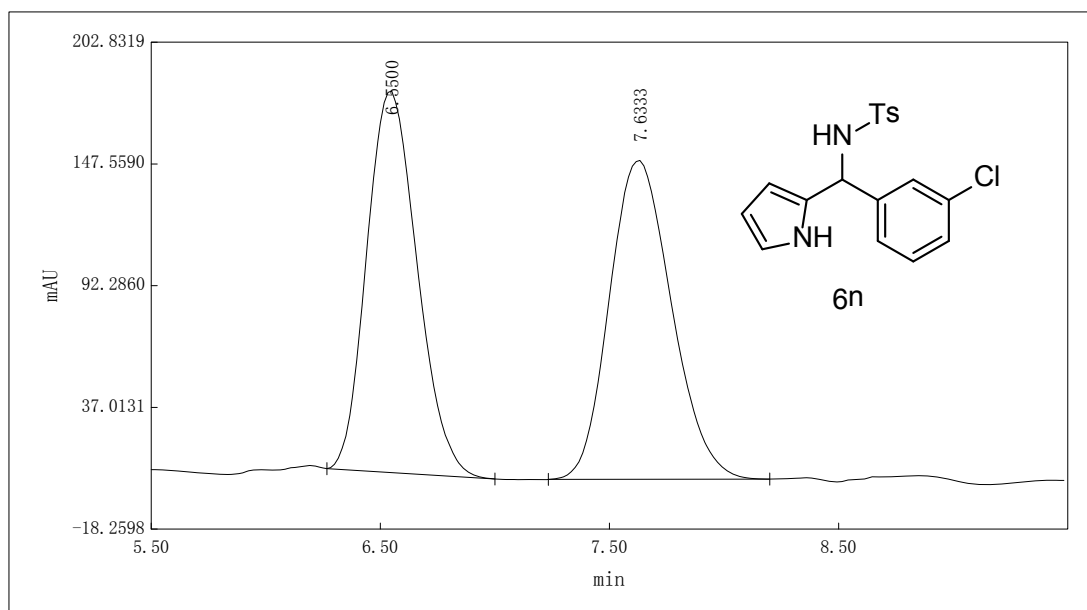

| Peak # | RetTime [min] | Area [mAU*s] | type | Peak width [s] | Area %  |
|--------|---------------|--------------|------|----------------|---------|
| 1      | 6.5500        | 2758.4248    | BB   | 44.0000        | 49.2558 |
| 2      | 7.6333        | 2841.7737    | BB   | 58.0000        | 50.7442 |

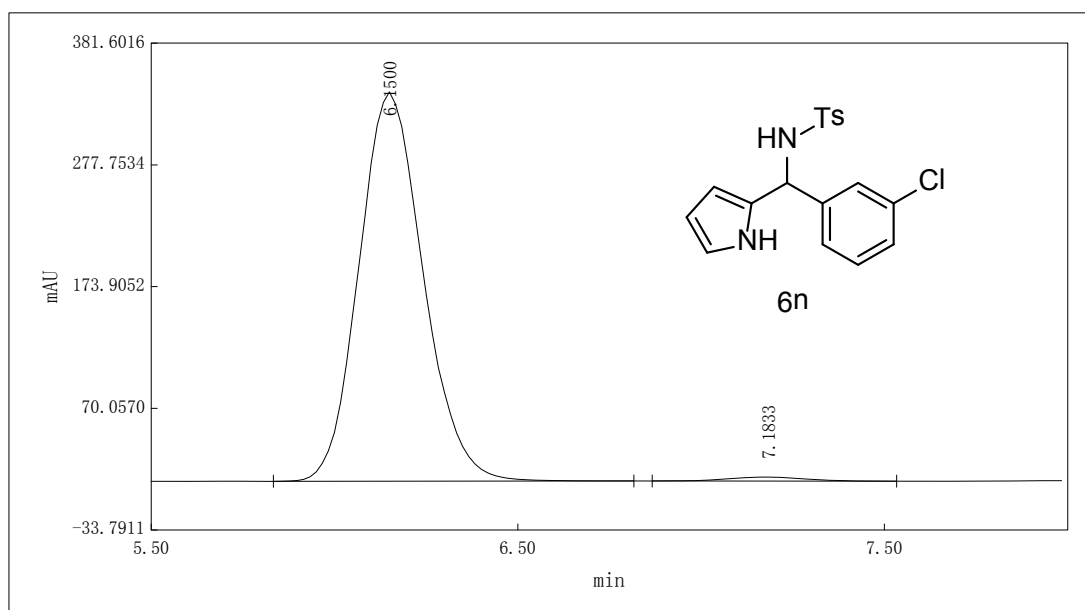

| Peak # | RetTime [min] | Area [mAU*s] | type | Peak width [s] | Area %  |
|--------|---------------|--------------|------|----------------|---------|
| 1      | 6.1500        | 4204.7581    | FF   | 59.0000        | 98.7911 |
| 2      | 7.1833        | 51.4532      | FF   | 40.0000        | 1.2089  |

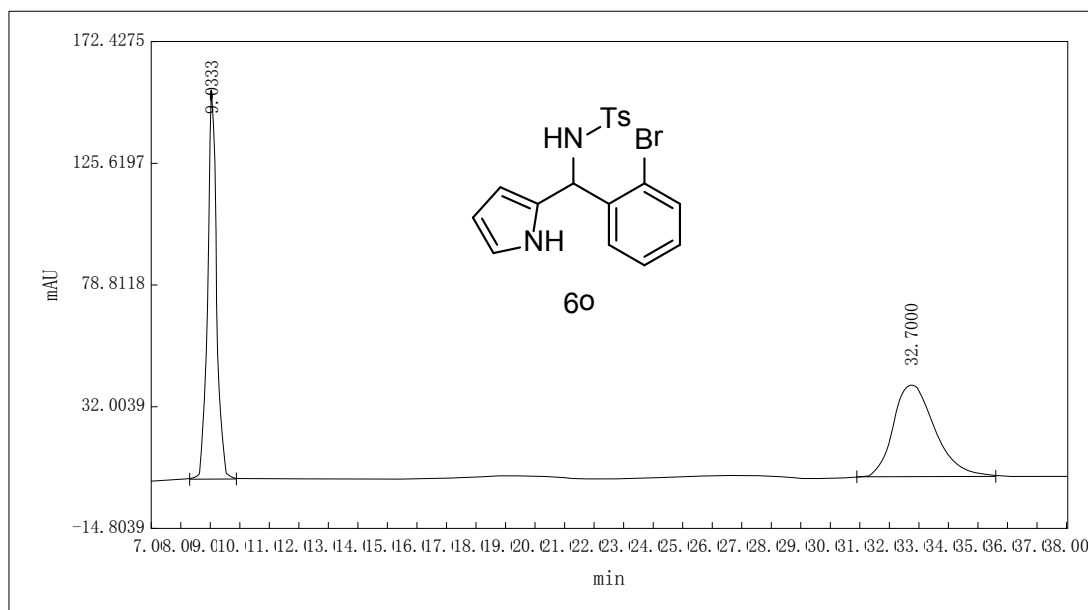

| Peak # | RetTime [min] | Area [mAU*s] | type | Peak width [s] | Area %  |
|--------|---------------|--------------|------|----------------|---------|
| 1      | 9.0333        | 3629.9775    | FF   | 95.0000        | 50.2667 |
| 2      | 32.7000       | 3591.4561    | FF   | 282.0000       | 49.7333 |

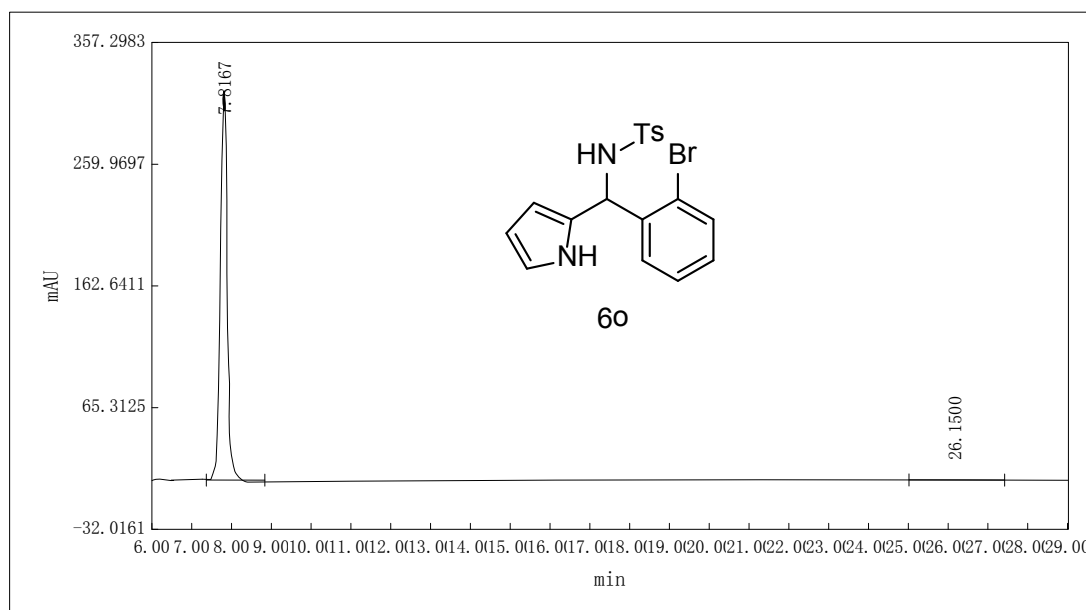

| Peak # | RetTime [min] | Area [mAU*s] | type | Peak width [s] | Area %  |
|--------|---------------|--------------|------|----------------|---------|
| 1      | 7.8167        | 4877.5885    | FF   | 88.0000        | 98.2233 |
| 2      | 26.1500       | 88.2270      | FF   | 144.0000       | 1.7767  |

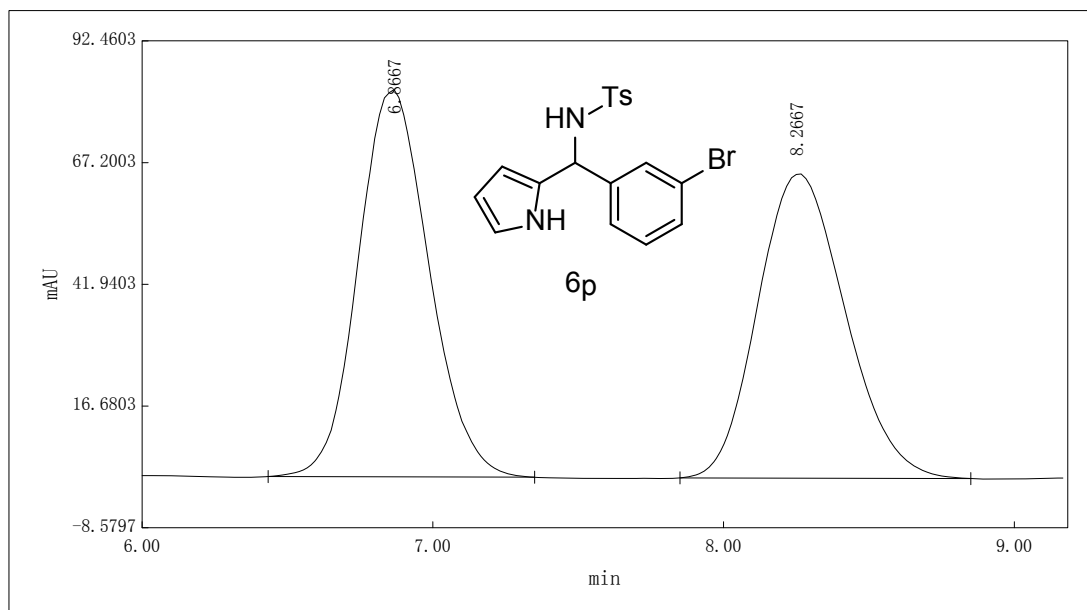

| Peak # | RetTime [min] | Area [mAU*s] | type | Peak width [s] | Area %  |
|--------|---------------|--------------|------|----------------|---------|
| 1      | 6.8667        | 1420.0285    | BB   | 55.0000        | 50.8260 |
| 2      | 8.2667        | 1373.8730    | BB   | 60.0000        | 49.1740 |

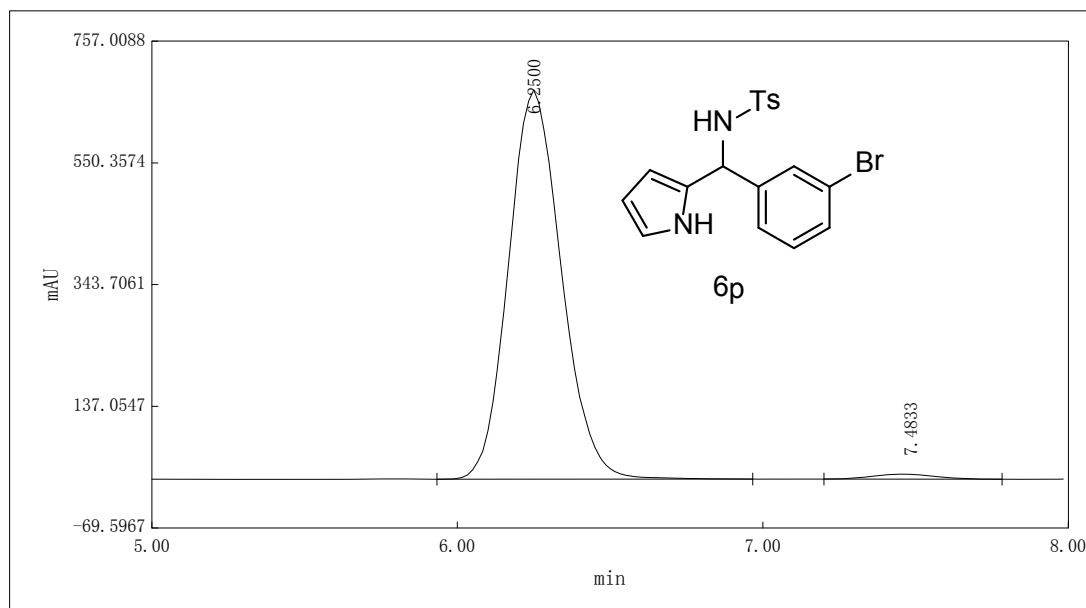

| Peak # | RetTime [min] | Area [mAU*s] | type | Peak width [s] | Area %  |
|--------|---------------|--------------|------|----------------|---------|
| 1      | 6.2500        | 8277.3009    | FF   | 62.0000        | 98.5176 |
| 2      | 7.4833        | 124.5477     | BB   | 35.0000        | 1.4824  |

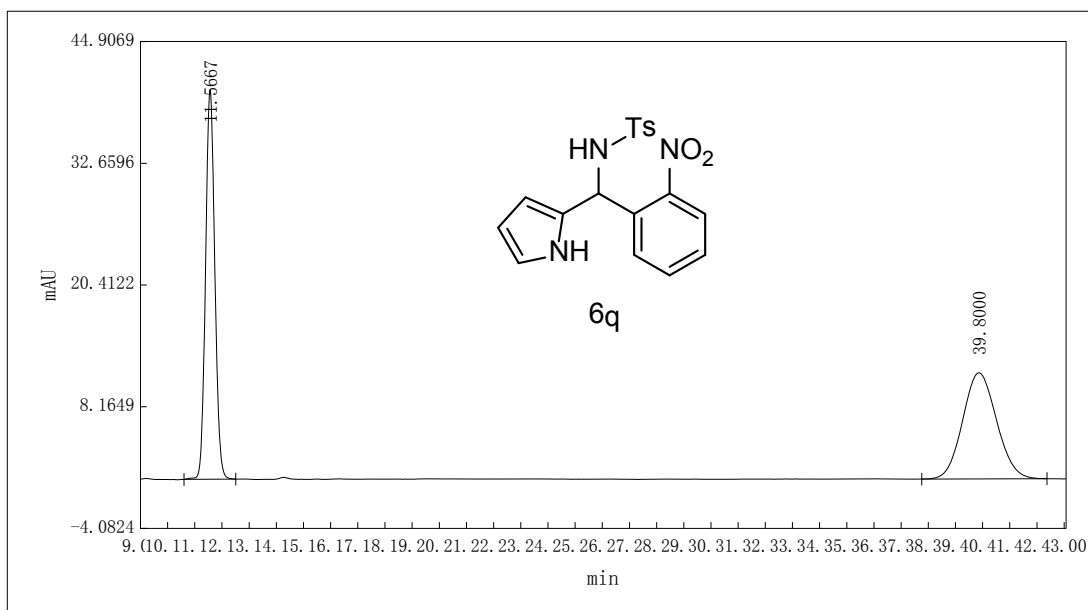

| Peak # | RetTime [min] | Area [mAU*s] | type | Peak width [s] | Area %  |
|--------|---------------|--------------|------|----------------|---------|
| 1      | 11.5667       | 962.4428     | FF   | 114.0000       | 50.0456 |
| 2      | 39.8000       | 960.6880     | FF   | 276.0000       | 49.9544 |

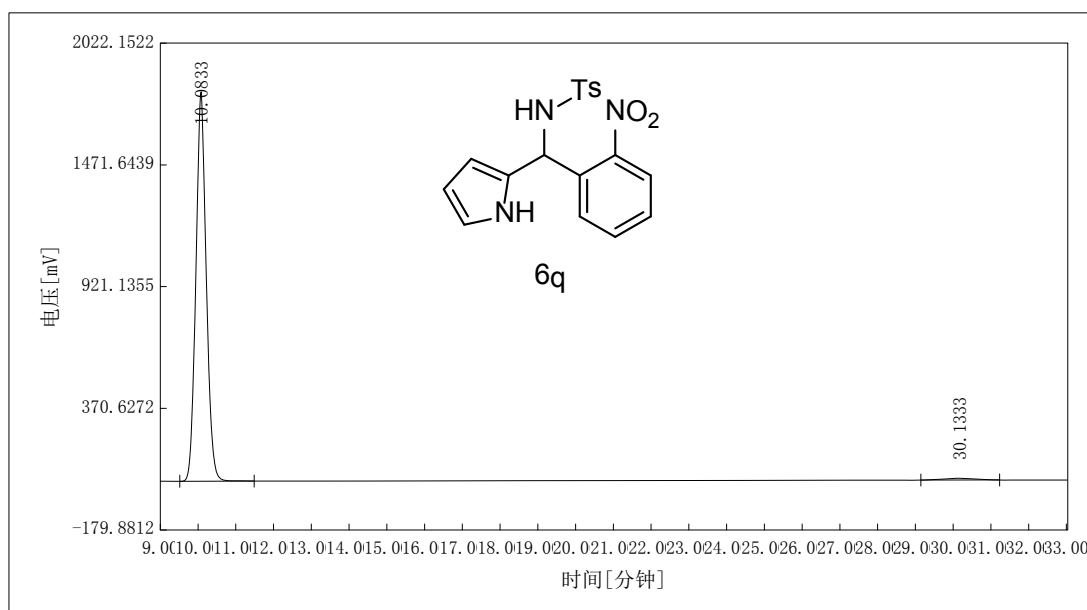

| Peak # | RetTime [min] | Area [mAU*s] | type | Peak width [s] | Area %  |
|--------|---------------|--------------|------|----------------|---------|
| 1      | 10.0833       | 34896.7765   | FF   | 118.0000       | 98.6567 |
| 2      | 30.1333       | 475.1477     | FF   | 125.0000       | 1.3433  |

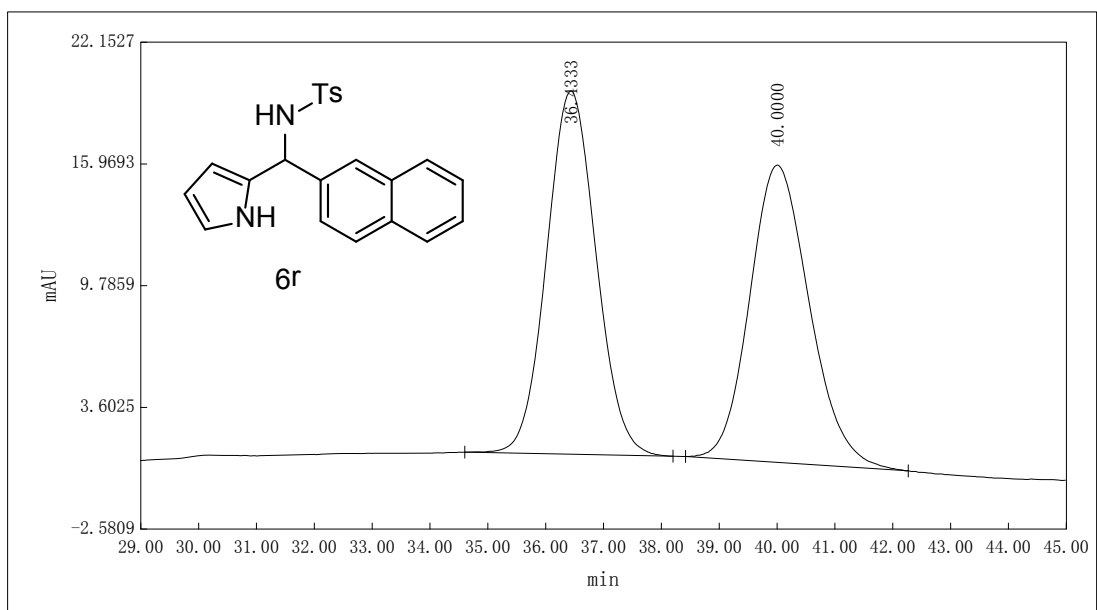

| Peak # | RetTime [min] | Area [mAU*s] | type | Peak width [s] | Area %  |
|--------|---------------|--------------|------|----------------|---------|
| 1      | 36.4333       | 1141.4287    | FF   | 216.0000       | 50.3029 |
| 2      | 40.0000       | 1127.6815    | FF   | 231.0000       | 49.6971 |

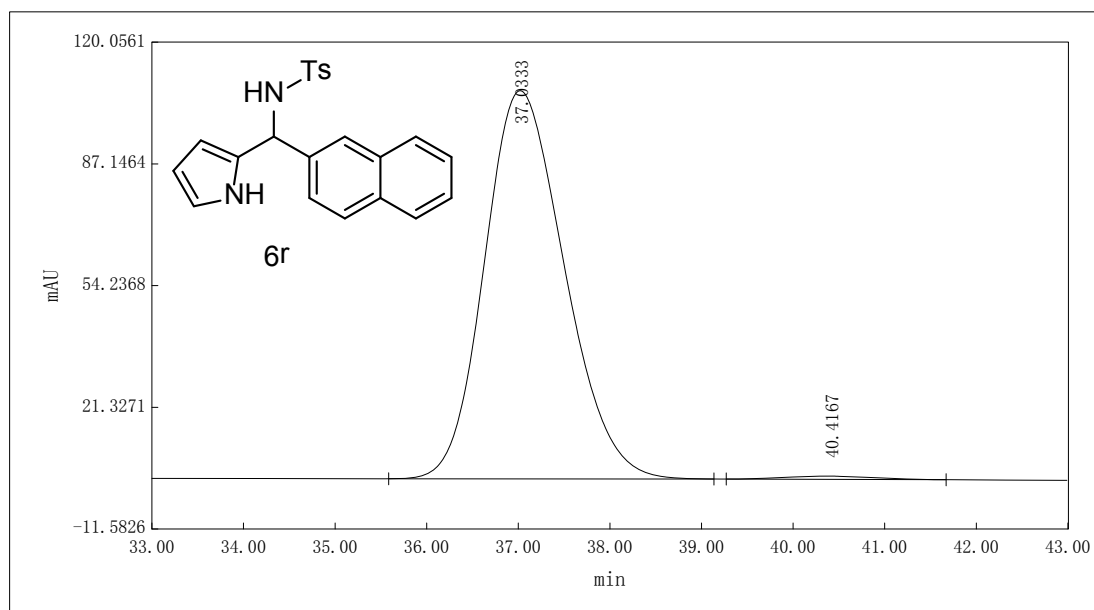

| Peak # | RetTime [min] | Area [mAU*s] | type | Peak width [s] | Area %  |
|--------|---------------|--------------|------|----------------|---------|
| 1      | 37.0333       | 6625.0331    | FF   | 213.0000       | 99.1005 |
| 2      | 40.4167       | 60.1364      | FF   | 144.0000       | 0.8995  |
